# Supplementary material
Source: PubMed Central journal article supplement (PMC7337986)

## SUPPORTING INFORMATION

### **Pd(0)-Catalyzed Directed *syn*-1,2-Carboboration and -Silylation: Alkene Scope, Applications in Dearomatization, and Stereocontrol via a Chiral Auxiliary**

Zhen Liu,<sup>[a]</sup> Jiahao Chen,<sup>[a]</sup> Hou-Xiang Lu,<sup>[a]</sup> Xiaohan Li,<sup>[a]</sup> Yang Gao,<sup>[a]</sup> John R. Coombs,<sup>[b]</sup> Matthew J. Goldfogel,<sup>[b]</sup> and Keary M. Engle\*<sup>[a]</sup>

\*keary@scripps.edu

<sup>[a]</sup>*Department of Chemistry, The Scripps Research Institute, 10550 North Torrey Pines Road, La Jolla, California 92037, United States*

<sup>[b]</sup>*Chemical Development, Bristol-Myers Squibb, One Squibb Drive, New Brunswick, New Jersey 08903, United States*

#### Table of Contents

|                                                                                  |      |
|----------------------------------------------------------------------------------|------|
| General Information.....                                                         | S-2  |
| Experimental Procedures.....                                                     | S-2  |
| Alkene Substrate Synthesis.....                                                  | S-2  |
| Reaction Optimization Details.....                                               | S-7  |
| General Procedure for Aryl- and Alkenylboration of Alkenes.....                  | S-8  |
| General Procedure for Dearomative Aryl- and Alkenylboration of Heterocycles..... | S-18 |
| General Procedure for Aryl- and Alkenylsilylation of Alkenes.....                | S-21 |
| Diastereoselective Arylboration using a Removable Chiral Directing Group.....    | S-25 |
| Alternative Stereoinduction Model for Diastereoselective Arylboration.....       | S-27 |
| Large-Scale Synthesis of (±)- <b>4c</b> .....                                    | S-28 |
| Procedures for the Transformations of Borylated Products.....                    | S-29 |
| X-Ray Crystallography.....                                                       | S-32 |
| References.....                                                                  | S-63 |
| NMR Spectra and SFC Chromatograms.....                                           | S-64 |

## GENERAL INFORMATION

Unless otherwise noted, all materials were used as received from commercial sources without further purification. All carbon electrophiles, B<sub>2</sub>pin<sub>2</sub>, PhMe<sub>2</sub>Si-Bpin, Pd<sub>2</sub>dba<sub>3</sub>, ligands, and solvents were purchased from Aldrich, Alfa Aesar, Oakwood, Strem, and Combi-Blocks. 4 Å molecular sieves was purchased from Aldrich and stored in a desiccator. Before using, an appropriate amount of molecular sieves was placed in a flask and activated in a microwave for 45 seconds (×3). NMR spectra were recorded on Bruker AV-400, DRX-500 and AV-600 instruments. Spectra were internally referenced to SiMe<sub>4</sub> or solvent signals. The following abbreviations (or combinations thereof) were used to explain multiplicities: s = singlet, d = doublet, t = triplet, q = quartet, p = pentet, m = multiplet. High-resolution mass spectra (HRMS) for new compounds were recorded on a Waters LC-TOF mass spectrometer, and the reported masses were automatically calibrated to be the neutral adduct of [M+H] by adding the mass of an electron. Enantiomeric excess (*ee*) was determined on a Waters UPC<sup>2</sup> system using commercially available chiral columns.

## EXPERIMENTAL PROCEDURES

### Alkene Substrate Synthesis

**Table S1.** Alkene substrates **1a–e**, **1g–j**, **1l–q**, **1t** and **1z**.

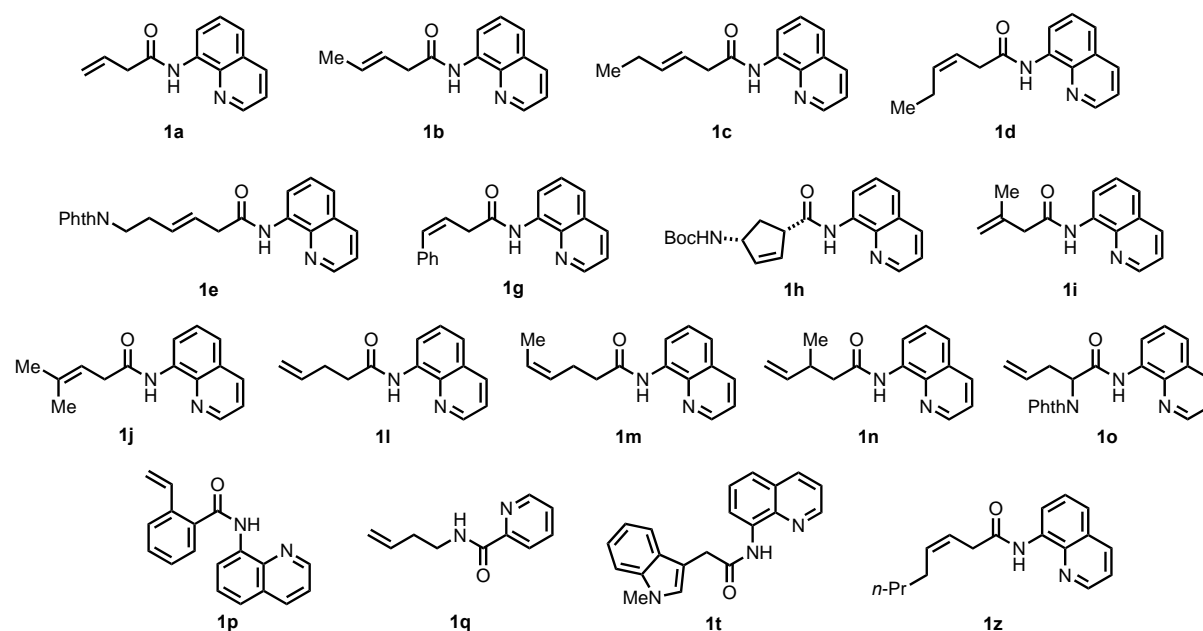

Alkene substrates **1a–e**, **1g–j**, **1l–q**, **1t** and **1z** were prepared according to literature procedures.<sup>[1–7]</sup>

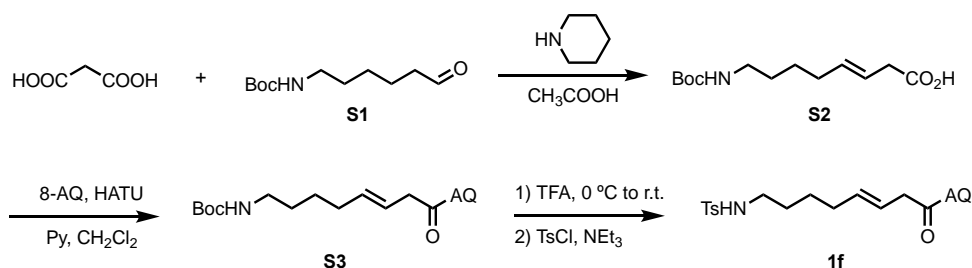

**Scheme S1:** Synthesis of (*E*)-8-((4-methylphenyl)sulfonamido)-*N*-(quinolin-8-yl)oct-3-enamide (**1f**).<sup>[1,8,9]</sup>

**(*E*)-8-((4-methylphenyl)sulfonamido)-*N*-(quinolin-8-yl)oct-3-enamide (**1f**):** The title compound was prepared by adapting several literature procedures.

**Knoevenagel condensation:**<sup>[8]</sup> Malonic acid (1.8 g, 17.3 mmol), *tert*-butyl (6-oxohexyl)carbamate<sup>[10]</sup> (**S1**) (3.4 g, 15.7 mmol), acetic acid (6  $\mu$ L) and piperidine (10  $\mu$ L) were charged into a 25-mL round-bottom flask equipped with a Teflon-coated magnetic stir bar containing DMSO (8 mL). The reaction mixture was stirred at 100 °C for 8 h. Upon completion, the reaction was quenched with brine (10 mL), and extracted with EtOAc (3  $\times$  10 mL). The combined organic layers were dried over Na<sub>2</sub>SO<sub>4</sub>, concentrated under vacuum, and purified by column chromatography (1:2 to 1:3 hexanes:EtOAc) to afford compound **S2** as a colorless oil (3.1 g, 76%).

**Amide coupling:**<sup>[11]</sup> Acid **S2** (3.0 g, 12 mmol) was charged into a 100-mL round-bottom flask equipped with a Teflon-coated magnetic stir bar containing CH<sub>2</sub>Cl<sub>2</sub> (18 mL). 8-Aminoquinoline (1.7 g, 12 mmol), pyridine (2.0 mL, 24 mmol), and HATU (6.84 g, 18 mmol) were added sequentially, and the reaction was stirred at ambient temperature for 36 h. The dark brown solution was diluted with EtOAc (100 mL), washed with sat. NaHCO<sub>3</sub> (2  $\times$  50 mL) and brine (50 mL), and purified by column chromatography (5:1 to 3:1 hexanes:EtOAc) to afford amide **S3** (3.4 g, 73%) as a light-yellow oil.

**Boc deprotection/Tosyl protection:**<sup>[9]</sup> To a stirred solution of **S3** (383 mg, 1 mmol) in CH<sub>2</sub>Cl<sub>2</sub> (20 mL) was added TFA (1 mL) dropwise at 0 °C. After being allowed to stir at room temperature for 1 h, the reaction mixture was diluted with EtOAc and quenched by slow addition of saturated NaHCO<sub>3</sub> (10 mL). The organic phase was separated and washed with brine (20 mL), dried over Na<sub>2</sub>SO<sub>4</sub>, and concentrated under vacuum to afford free amine, which was carried forward to the next step without further purification. The crude product was dissolved in THF (4 mL), followed by addition of TsCl (196 mg, 1 mmol) and NEt<sub>3</sub> (277  $\mu$ L, 2 mmol). The reaction mixture was stirred at room temperature for 1 h. Upon completion, the reaction was diluted with EtOAc and washed with saturated NaHCO<sub>3</sub> (10 mL). After being dried over Na<sub>2</sub>SO<sub>4</sub> and concentrated under vacuum, the resulting residue was purified by column chromatography (1:1 hexanes:EtOAc) to afford compound **1f** as a yellow solid (289 mg, 66%). <sup>1</sup>H NMR (600 MHz, CDCl<sub>3</sub>)  $\delta$  9.99 (s, 1H), 8.88–8.65 (m, 2H), 8.16 (dd, *J* = 8.3, 1.7 Hz, 1H), 7.84–7.66 (m, 2H), 7.61–7.37 (m, 3H), 7.28 (d, *J* = 8.0 Hz, 2H), 5.86–5.56 (m, 2H), 4.43 (t, *J* = 6.2 Hz, 1H), 3.25 (d, *J* = 5.7 Hz, 2H), 2.96 (q, *J* = 6.7 Hz, 2H), 2.41 (s, 3H), 2.23–2.06 (m, 2H), 1.59–1.43 (m, 4H); <sup>13</sup>C NMR (150 MHz, CDCl<sub>3</sub>)  $\delta$  169.8, 148.2, 143.3, 138.5, 136.9, 136.3, 135.9, 134.4, 129.7, 127.9, 127.4, 127.1, 123.0, 121.6, 121.6, 116.3, 43.1, 42.0, 32.0, 29.0, 26.0, 21.5; HRMS (ESI-TOF) Calcd for C<sub>24</sub>H<sub>28</sub>N<sub>3</sub>O<sub>3</sub>S [M+H] 438.1851, found 438.1848.

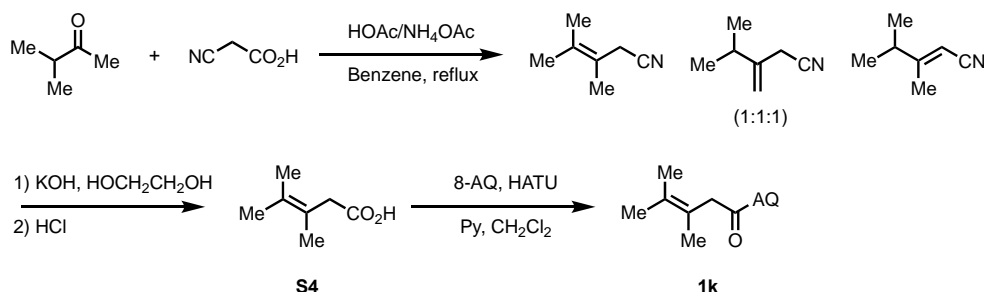

**Scheme S2:** Synthesis of 3,4-dimethyl-*N*-(quinolin-8-yl)pent-3-enamide (**1k**).<sup>[1,11,12]</sup>

**3,4-dimethyl-*N*-(quinolin-8-yl)pent-3-enamide (**1k**):** The title compound was prepared by adapting several literature procedures.

**Knoevenagel condensation:**<sup>[11,12]</sup> In a 100-mL round-bottom flask, a mixture of cyanoacetic acid (8.51 g, 100 mmol), isopropyl methyl ketone (8.61 g, 100 mmol), acetic acid (3.0 g, 50 mmol), ammonium acetate (1.5 g, 20 mmol) and 20 mL of benzene were heated with a Dean-Stark trap until completion (around 2 days). The reaction mixture was diluted with diethyl ether (60 mL), washed with sat. NaHCO<sub>3</sub> (3 × 20 mL) and brine (3 × 20 mL), and dried over Na<sub>2</sub>SO<sub>4</sub>. A mixture of nitrile isomers was isolated by silica gel column chromatography (30:1 hexanes:EtOAc).

**Hydrolysis of nitriles:**<sup>[11,12]</sup> A mixture of nitriles (180 mg, 1.65 mmol) and KOH (194 mg, 3.46 mmol) was heated in ethylene glycol (15 mL) at reflux for 2 days. The solution was cooled, diluted with water (50 mL) and washed with diethyl ether (2 × 20 mL). The aqueous layer was then acidified with 3 N HCl solution and extracted with 3:1 EtOAc/toluene mixture (×3). The organic layer was further washed with brine (2 × 20 mL) and dried over Na<sub>2</sub>SO<sub>4</sub>. After removal of the volatiles, the acid **S4** (115 mg, 54%) was carried on to the next step without further purification.

**Amide coupling:**<sup>[11]</sup> 3,4-Dimethylpent-3-enoic acid (**S4**) (64 mg, 0.5 mmol) and 8-aminoquinoline (63 mg, 0.44 mmol) were used to prepare amide **1k** following the above amide coupling procedure. The final product was isolated as a white solid (66 mg, 60%) by column chromatography (30:1 to 15:1 hexanes:EtOAc). <sup>1</sup>H NMR (400 MHz, CDCl<sub>3</sub>) δ 10.24 (s, 1H), 9.09–8.56 (m, 2H), 8.14 (dd, *J* = 8.3, 1.7 Hz, 1H), 7.64–7.34 (m, 3H), 3.32 (s, 2H), 1.90–1.82 (m, 9H); <sup>13</sup>C NMR (125 MHz, CDCl<sub>3</sub>) δ 169.9, 148.3, 138.7, 136.2, 134.6, 130.7, 127.9, 127.4, 122.2, 121.5, 121.3, 116.2, 44.2, 20.9, 20.8, 19.5; HRMS (ESI-TOF) Calcd for C<sub>16</sub>H<sub>19</sub>N<sub>2</sub>O [M+H] 255.1497, found 255.1499.

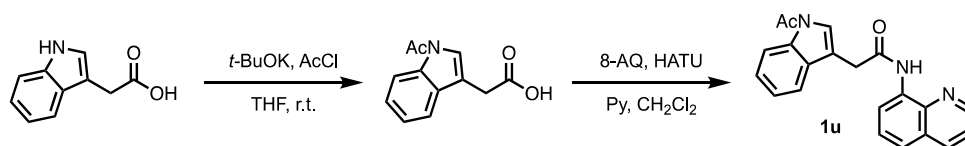

**Scheme S3:** Synthesis of 2-(1-acetyl-1*H*-indol-3-yl)-*N*-(quinolin-8-yl)acetamide (**1u**).<sup>[1,13]</sup>

**2-(1-acetyl-1*H*-indol-3-yl)-*N*-(quinolin-8-yl)acetamide (**1u**):** The title compound was prepared by adapting several literature procedures.

**Acetyl protection:**<sup>[13]</sup> To a stirring solution of 2-(1*H*-indol-3-yl)acetic acid (1.75 g, 10 mmol) in THF (80 mL) was added a solution of *t*-BuOK (2.24 g, 20 mmol) in THF (80 mL) dropwise at –78 °C. After being stirred at this temperature for 1 h, a solution of acetyl chloride (1.18 g, 15 mmol) in THF (2 mL) was added dropwise, and the resulting solution was stirred at room temperature for 16 h. Upon completion, the reaction was quenched by dropwise addition of 12 N HCl solution. The organic layer was separated, and the aqueous layer was extracted by EtOAc (2 × 20 mL). The combined organic layers were further



washed with water (20 mL) brine (20 mL) and then dried over Na<sub>2</sub>SO<sub>4</sub>. The crude acid was purified by silica gel column chromatography (2:1 hexanes:EtOAc to pure EtOAc).

**Amide coupling:**<sup>[1]</sup> 2-(1-acetyl-1*H*-indol-3-yl)acetic acid (542 mg, 2.5 mmol) and 8-aminoquinoline (300 mg, 2.1 mmol) were used to prepare amide **1u** following the above amide coupling procedure. The final product was isolated as a yellow solid (286 mg, 40% in 2 steps) by column chromatography (2:1 hexanes:EtOAc). <sup>1</sup>H NMR (600 MHz, CDCl<sub>3</sub>) δ 10.11 (s, 1H), 8.76 (dd, *J* = 7.4, 1.5 Hz, 1H), 8.64 (dd, *J* = 4.2, 1.7 Hz, 1H), 8.48 (d, *J* = 8.3 Hz, 1H), 8.12 (dd, *J* = 8.2, 1.7 Hz, 1H), 7.74–7.28 (m, 7H), 4.00 (d, *J* = 1.1 Hz, 2H), 2.67 (s, 3H); <sup>13</sup>C NMR (150 MHz, CDCl<sub>3</sub>) δ 168.1, 167.8, 147.7, 138.0, 135.8, 135.5, 133.7, 129.6, 127.4, 126.9, 125.2, 123.7, 123.4, 121.3, 121.2, 118.5, 116.3, 116.0, 115.3, 34.2, 23.6; **HRMS** (ESI-TOF) Calcd for C<sub>21</sub>H<sub>18</sub>N<sub>3</sub>O<sub>2</sub> [M+H] 344.1399, found 344.1397.

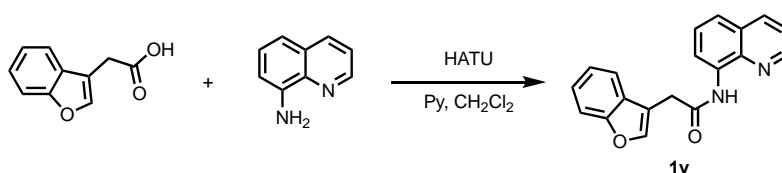

**Scheme S4:** Synthesis of 2-(benzofuran-3-yl)-*N*-(quinolin-8-yl)acetamide (**1v**).<sup>[1]</sup>

**2-(benzofuran-3-yl)-*N*-(quinolin-8-yl)acetamide (**1v**):** 2-(Benzofuran-3-yl)acetic acid (506 mg, 2.9 mmol) and 8-aminoquinoline (360 mg, 2.5 mmol) were used to prepare amide **1u** following the above amide coupling procedure.<sup>[1]</sup> The final product was isolated as a light-yellow solid (656 mg, 87%) by column chromatography (15:1 hexanes:EtOAc). <sup>1</sup>H NMR (500 MHz, CDCl<sub>3</sub>) δ 10.08 (s, 1H), 8.76 (dd, *J* = 7.4, 1.5 Hz, 1H), 8.63 (dd, *J* = 4.2, 1.7 Hz, 1H), 8.10 (dd, *J* = 8.2, 1.8 Hz, 1H), 7.78 (s, 1H), 7.73–7.62 (m, 1H), 7.58–7.44 (m, 3H), 7.42–7.22 (m, 3H), 3.97 (d, *J* = 1.0 Hz, 2H); <sup>13</sup>C NMR (125 MHz, CDCl<sub>3</sub>) δ 168.2, 155.5, 148.2, 143.2, 138.4, 136.2, 134.2, 127.8, 127.5, 127.3, 124.7, 122.8, 121.7, 121.5, 119.8, 116.4, 113.9, 111.5, 33.4; **HRMS** (ESI-TOF) Calcd for C<sub>19</sub>H<sub>15</sub>N<sub>2</sub>O<sub>2</sub> [M+H] 303.1134, found 303.1134.

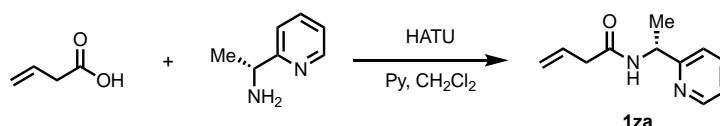

**Scheme S5:** Synthesis of (*R*)-*N*-(1-(pyridine-2-yl)ethyl)but-3-enamide (**1za**).<sup>[1]</sup>

**(*R*)-*N*-(1-(pyridine-2-yl)ethyl)but-3-enamide (**1y**):** But-3-enoic acid (405 mg, 4.7 mmol) and (*R*)-1-(pyridine-2-yl)ethan-1-amine (500 mg, 4.1 mmol) were used to prepare amide **1y** following the above amide coupling procedure.<sup>[1]</sup> The final product was isolated as a white solid (389 mg, 50%, 98% *ee*) by column chromatography (1:1 to 1:2 hexanes:EtOAc). <sup>1</sup>H NMR (500 MHz, CDCl<sub>3</sub>) δ 8.54 (dt, *J* = 4.8, 1.3 Hz, 1H), 7.66 (td, *J* = 7.7, 1.8 Hz, 1H), 7.26–7.15 (m, 2H), 7.03 (s, 1H), 6.15–5.79 (m, 1H), 5.34–5.19 (m, 2H), 5.14 (p, *J* = 6.9 Hz, 1H), 3.05 (dq, *J* = 7.2, 1.2 Hz, 2H), 1.46 (d, *J* = 6.8 Hz, 3H); <sup>13</sup>C NMR (150 MHz, CDCl<sub>3</sub>) δ 169.8, 160.8, 149.0, 136.8, 131.3, 122.3, 121.5, 119.5, 49.7, 41.7, 22.7; **HRMS** (ESI-TOF) Calcd for C<sub>11</sub>H<sub>15</sub>N<sub>2</sub>O [M+H] 191.1184, found 191.1186; **HPLC** (chiral column) The enantiomeric excess was determined by chiral HPLC on a Daicel AD-H column (5 μm, 4.6×250 mm), 20% *i*-PrOH/Hexanes, 1.0 mL/min, λ = 246 nm, *t* (major) = 4.293 min, *t* (minor) = 5.773 min.

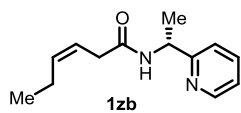

**(*R,Z*)-*N*-(1-(pyridine-2-yl)ethyl)hex-3-enamide (1zb):** (*Z*)-Hex-3-enoic acid<sup>[14]</sup> (700 mg, 6 mmol) and (*R*)-1-(pyridine-2-yl)ethan-1-amine (700 mg, 5 mmol) were used to prepare amide **1zb** following the above amide coupling procedure.<sup>[1]</sup> The final product was isolated as a yellow oil (796 mg, 73%) by column chromatography (1:1 to 1:2 hexanes:EtOAc). <sup>1</sup>H NMR (500 MHz, CDCl<sub>3</sub>) δ 8.53 (ddd, *J* = 4.9, 1.8, 0.9 Hz, 1H), 7.65 (td, *J* = 7.7, 1.8 Hz, 1H), 7.24–7.15 (m, 2H), 7.08 (s, 1H), 5.70 (dt, *J* = 10.1, 7.3, 1.4 Hz, 1H), 5.56 (dt, *J* = 10.8, 7.6, 1.6 Hz, 1H), 5.13 (p, *J* = 6.9 Hz, 1H), 3.05 (dd, *J* = 7.6, 1.3 Hz, 2H), 2.08 (pd, *J* = 7.5, 1.5 Hz, 2H), 1.45 (d, *J* = 6.8 Hz, 3H), 0.99 (t, *J* = 7.6 Hz, 3H); <sup>13</sup>C NMR (125 MHz, CDCl<sub>3</sub>) δ 160.9, 149.0, 136.7, 136.5, 122.2, 121.4, 121.0, 49.6, 35.2, 22.6, 20.6, 13.8; HRMS (ESI-TOF) Calcd for C<sub>13</sub>H<sub>19</sub>N<sub>2</sub>O [M+H] 219.1497, found 219.1494.

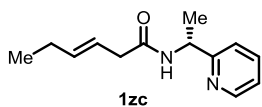

**(*R,E*)-*N*-(1-(pyridine-2-yl)ethyl)hex-3-enamide (1zc):** (*E*)-Hex-3-enoic acid (600 mg, 5 mmol) and (*R*)-1-(pyridine-2-yl)ethan-1-amine (500 mg, 4 mmol) were used to prepare amide **1zc** following the above amide coupling procedure.<sup>[1]</sup> The final product was isolated as a white solid (654 mg, 75% yield). <sup>1</sup>H NMR (500 MHz, CDCl<sub>3</sub>) δ 8.53 (dt, *J* = 4.8, 1.5 Hz, 1H), 7.65 (td, *J* = 7.7, 1.8 Hz, 1H), 7.25–7.16 (m, 2H), 7.06 (s, 1H), 5.80–5.62 (m, 1H), 5.62–5.48 (m, 1H), 5.12 (p, *J* = 6.9 Hz, 1H), 2.98 (ddt, *J* = 7.1, 2.6, 1.2 Hz, 2H), 2.19–2.00 (m, 2H), 1.46 (d, *J* = 6.8 Hz, 3H), 1.03 (t, *J* = 7.5 Hz, 3H); <sup>13</sup>C NMR (125 MHz, CDCl<sub>3</sub>) δ 170.7, 161.0, 149.0, 137.7, 136.8, 122.3, 121.7, 121.5, 49.7, 40.6, 25.6, 22.8, 13.6; HRMS (ESI-TOF) Calcd for C<sub>13</sub>H<sub>19</sub>N<sub>2</sub>O [M+H] 219.1497, found 219.1495.

## Reaction Optimization Details

**Table S2.** Optimization of 1,2-arylboration reaction.<sup>a</sup>

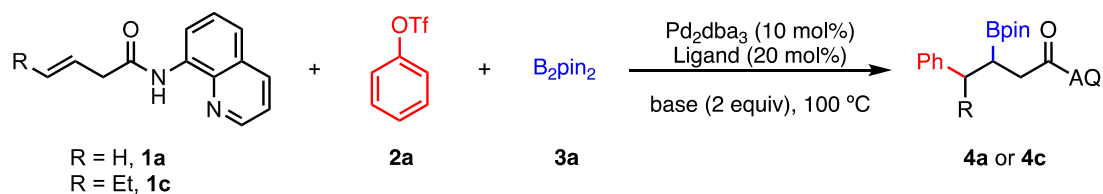

| entry           | Substrate | Solvent          | Base                            | Ligand             | Yield <sup>b</sup> (%) |
|-----------------|-----------|------------------|---------------------------------|--------------------|------------------------|
| 1               | <b>1a</b> | DMPU             | K <sub>2</sub> CO <sub>3</sub>  | Cy-JohnPhos        | 61                     |
| 2               | <b>1a</b> | DMPU             | KF                              | Cy-JohnPhos        | 70                     |
| 3               | <b>1a</b> | DMPU             | K <sub>2</sub> HPO <sub>4</sub> | Cy-JohnPhos        | 89                     |
| 4               | <b>1a</b> | DMPU             | <i>i</i> -Pr <sub>2</sub> NEt   | Cy-JohnPhos        | 90                     |
| 5               | <b>1a</b> | <i>t</i> -AmyIOH | KF                              | Cy-JohnPhos        | 95                     |
| 6               | <b>1a</b> | DMSO             | KF                              | Cy-JohnPhos        | 15                     |
| 7               | <b>1a</b> | toluene          | KF                              | Cy-JohnPhos        | 89                     |
| 8 <sup>c</sup>  | <b>1a</b> | <i>t</i> -AmyIOH | <i>i</i> -Pr <sub>2</sub> NEt   | Cy-JohnPhos        | (98)                   |
| 9 <sup>c</sup>  | <b>1c</b> | <i>t</i> -AmyIOH | <i>i</i> -Pr <sub>2</sub> NEt   | PPh <sub>3</sub>   | trace                  |
| 10 <sup>c</sup> | <b>1c</b> | <i>t</i> -AmyIOH | <i>i</i> -Pr <sub>2</sub> NEt   | CyPPh <sub>2</sub> | 12                     |
| 11 <sup>c</sup> | <b>1c</b> | <i>t</i> -AmyIOH | <i>i</i> -Pr <sub>2</sub> NEt   | RuPhos             | >99                    |
| 12 <sup>c</sup> | <b>1c</b> | <i>t</i> -AmyIOH | <i>i</i> -Pr <sub>2</sub> NEt   | XPhos              | 98                     |

<sup>a</sup> Reaction conditions: **1a** or **1c** (0.1 mmol), **2a** (1.5 equiv), **3a** (2 equiv), Pd<sub>2</sub>dba<sub>3</sub> (10 mol%), Ligand (20 mol%), base (2 equiv), 4Å MS (15–30 mg), 100 °C, N<sub>2</sub>, 16–20 h. <sup>b</sup> Yields were determined by <sup>1</sup>H NMR analysis of the crude reaction mixture using CH<sub>2</sub>Br<sub>2</sub> as internal standard. Values in parentheses represent isolated yields. <sup>c</sup> Pd<sub>2</sub>dba<sub>3</sub> (3 mol%), Ligand (6 mol%), 90 °C.

## General Procedure for Aryl- and Alkenylboration of Alkenes

**General Procedure:** To a 4-mL scintillation vial equipped with a Teflon-coated magnetic stir bar were added the alkene substrate (0.1 mmol), bis(pinacolato)diboron (50.8 mg, 0.2 mmol), Pd<sub>2</sub>(dba)<sub>3</sub> (2.8 mg, 3 mol%), Cy-JohnPhos (2.2 mg, 6 mol%), and 4Å molecular sieves (~28 mg). The vial was sealed with a screw-top septum cap and was then evacuated and backfilled with N<sub>2</sub> (×3). Under positive N<sub>2</sub> pressure, aryl or alkenyl triflate (0.15 mmol), *i*-Pr<sub>2</sub>Net (34.8 μL, 0.2 mmol), and *t*-AmylOH (0.2 mL) were added. All needle inlets/outlets were removed, and the reaction was placed in a heating block that was pre-heated to 90 °C. (Note: To prevent solvent evaporation through the punctures in the septum, at this stage we typically switch the old cap for new cap under a flow of N<sub>2</sub> gas.) After 40–44 h, the black reaction mixture was allowed to cool to room temperature and filtered through a short plug of celite (CH<sub>2</sub>Cl<sub>2</sub> or EtOAc as eluent). The solvent was removed in *vacuo* to afford a dark brown residue. Upon purification by column chromatography with 5:1 to 3:1 hexanes:EtOAc as the eluent, the pure product was obtained.

Note:<sup>[1]</sup> Column chromatography should be performed quickly to prevent product decomposition on silica. (We typically aim to complete the column in 10–15 min for a reaction on this scale.) If pinacol is still present after column purification, it can be removed by heating under vacuum at 80 °C for 1 h.

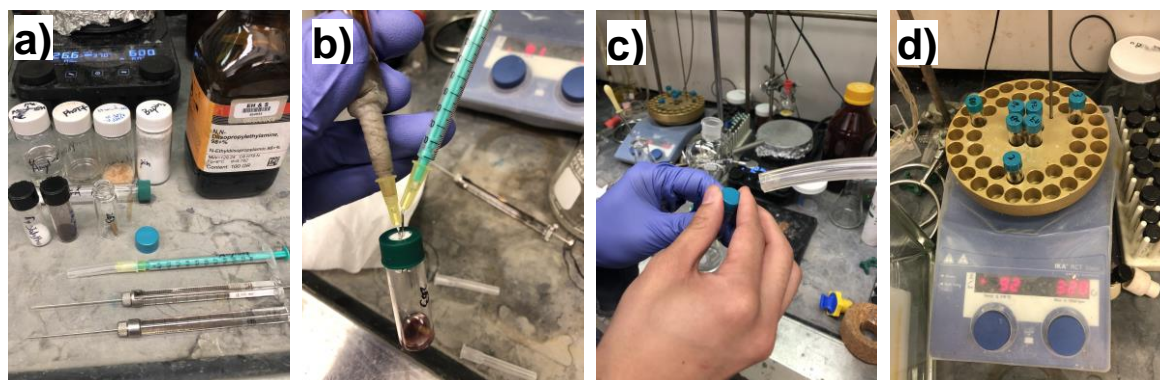

**Figure S1:** Photographic depiction of reaction setup.

S) Reactants. B) Adding solvent. C) Switching cap under N<sub>2</sub>. D) Heating on stir plate.

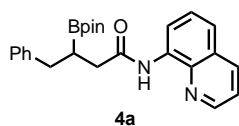

**4-phenyl-*N*-(quinolin-8-yl)-3-(4,4,5,5-tetramethyl-1,3,2-dioxaborolan-2-yl)butanamide (4a):** The title compound was prepared from **1a** (21.2 mg, 0.1 mmol), phenyl triflate (24.4 μL, 0.15 mmol), and bis(pinacolato)diboron (50.8 mg, 0.2 mmol) with *t*-AmylOH (0.4 mL) according to the general carboboration procedure. Purification using silica gel chromatography with 5:1 hexanes:EtOAc as the eluent gave the product as a colorless oil (40.8 mg, 98% yield). <sup>1</sup>H NMR (600 MHz, CDCl<sub>3</sub>) δ 9.72 (s, 1H), 8.99–8.64 (m, 2H), 8.16 (dd, *J* = 8.3, 1.7 Hz, 1H), 7.67–7.40 (m, 3H), 7.31–7.25 (m, 4H), 7.23–7.17 (m, 1H), 2.98 (dd, *J* = 13.9, 6.3 Hz, 1H), 2.75 (dd, *J* = 13.9, 9.4 Hz, 1H), 2.71–2.57 (m, 2H), 1.87 (ddt, *J* = 9.5, 8.0, 6.4 Hz, 1H), 1.27 (s, 6H), 1.24 (s, 6H); <sup>13</sup>C NMR (150 MHz, CDCl<sub>3</sub>) δ 171.6, 148.0,

141.5, 138.3, 136.2, 134.7, 129.0, 128.2, 127.9, 127.4, 125.8, 121.5, 121.2, 116.4, 83.3, 38.4, 36.0, 24.8, 24.7; **HRMS** (ESI-TOF) Calcd for C<sub>25</sub>H<sub>30</sub>BN<sub>2</sub>O<sub>3</sub> [M+H] 416.2386, found 416.2382.

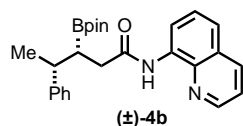

**4-phenyl-N-(quinolin-8-yl)-3-(4,4,5,5-tetramethyl-1,3,2-dioxaborolan-2-yl)pentanamide ((±)-4b):** The title compound was prepared from **1b** (22.6 mg, 0.1 mmol), phenyl triflate (24.4 μL, 0.15 mmol), and bis(pinacolato)diboron (50.8 mg, 0.2 mmol) with *t*-AmylOH (0.4 mL) according to the general carboboration procedure. Purification using silica gel chromatography with 10:1 to 5:1 hexanes:EtOAc as the eluent gave the product as a colorless oil (42.6 mg, 99% yield). **<sup>1</sup>H NMR** (600 MHz, CDCl<sub>3</sub>) δ 9.74 (s, 1H), 9.02–8.53 (m, 2H), 8.14 (dd, *J* = 8.3, 1.7 Hz, 1H), 7.62–7.40 (m, 3H), 7.34–7.22 (m, 4H), 7.20–7.10 (m, 1H), 2.99 (p, *J* = 7.1 Hz, 1H), 2.76–2.52 (m, 2H), 1.92 (ddd, *J* = 10.2, 7.7, 5.8 Hz, 1H), 1.38 (d, *J* = 7.1 Hz, 3H), 1.10 (s, 6H), 1.02 (s, 6H); **<sup>13</sup>C NMR** (150 MHz, CDCl<sub>3</sub>) δ 171.9, 148.0, 146.5, 138.3, 136.3, 134.7, 128.1, 127.9, 127.7, 127.5, 126.0, 121.5, 121.0, 116.4, 83.1, 40.7, 37.7, 24.8, 24.6, 20.7; **HRMS** (ESI-TOF) Calcd for C<sub>26</sub>H<sub>32</sub>BN<sub>2</sub>O<sub>3</sub> [M+H] 430.2542, found 430.2535.

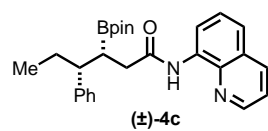

**4-phenyl-N-(quinolin-8-yl)-3-(4,4,5,5-tetramethyl-1,3,2-dioxaborolan-2-yl)hexanamide ((±)-4c):** The title compound was prepared from **1c** (24.0 mg, 0.1 mmol), phenyl triflate (24.4 μL, 0.15 mmol), and bis(pinacolato)diboron (50.8 mg, 0.2 mmol) with *t*-AmylOH (0.4 mL) according to the general carboboration procedure. Purification using silica gel chromatography with 10:1 to 5:1 hexanes:EtOAc as the eluent gave the product as a yellow solid (44.0 mg, 99% yield). **<sup>1</sup>H NMR** (500 MHz, CDCl<sub>3</sub>) δ 9.74 (s, 1H), 8.94–8.61 (m, 2H), 8.14 (dd, *J* = 8.3, 1.7 Hz, 1H), 7.63–7.36 (m, 3H), 7.30–7.21 (m, 4H), 7.21–7.11 (m, 1H), 2.80–2.47 (m, 3H), 2.04–1.86 (m, 2H), 1.77–1.64 (m, 1H), 1.08 (s, 6H), 1.00 (s, 6H), 0.76 (t, *J* = 7.3 Hz, 3H); **<sup>13</sup>C NMR** (150 MHz, CDCl<sub>3</sub>) δ 171.9, 148.0, 144.4, 138.3, 136.2, 134.7, 128.7, 128.0, 127.9, 127.4, 126.1, 121.5, 121.0, 116.4, 83.0, 49.0, 38.4, 27.8, 24.8, 24.6, 12.2; **HRMS** (ESI-TOF) Calcd for C<sub>27</sub>H<sub>34</sub>BN<sub>2</sub>O<sub>3</sub> [M+H] 444.2699, found 444.2702.

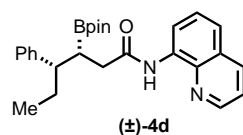

**4-phenyl-N-(quinolin-8-yl)-3-(4,4,5,5-tetramethyl-1,3,2-dioxaborolan-2-yl)hexanamide ((±)-4d):** The title compound was prepared from **1d** (24.0 mg, 0.1 mmol), phenyl triflate (24.4 μL, 0.15 mmol), and bis(pinacolato)diboron (50.8 mg, 0.2 mmol) with *t*-AmylOH (4 mL) according to the general carboboration procedure. Purification using silica gel chromatography with 10:1 to 5:1 hexanes:EtOAc as the eluent gave the product as a white solid (43.1 mg, 97% yield). **<sup>1</sup>H NMR** (500 MHz, CDCl<sub>3</sub>) δ 9.49 (s, 1H), 8.95–8.56 (m, 2H), 8.11 (dd, *J* = 8.2, 1.7 Hz, 1H), 7.66–7.36 (m, 3H), 7.29 (dd, *J* = 17.2, 9.7 Hz, 2H), 7.24–7.08 (m, 3H), 2.59 (td, *J* = 11.0, 3.5 Hz, 1H), 2.49 (dd, *J* = 15.8, 11.2 Hz, 1H), 2.35 (dd, *J* = 15.8, 4.9 Hz, 1H), 1.96–1.84 (m, 1H), 1.80 (td, *J* = 11.1, 4.9 Hz, 1H), 1.69–1.61 (m, 1H), 1.30 (s, 6H), 1.27 (s, 6H), 0.70 (t, *J* = 7.3 Hz, 3H); **<sup>13</sup>C NMR** (150 MHz, CDCl<sub>3</sub>) δ 171.9, 147.9, 144.7, 138.2, 136.2, 134.7, 128.3, 128.1, 127.8, 127.4, 126.1, 121.4, 120.9, 116.3, 83.2, 48.8,

38.9, 29.4, 25.0, 24.9, 12.2; **HRMS** (ESI-TOF) Calcd for C<sub>27</sub>H<sub>34</sub>BN<sub>2</sub>O<sub>3</sub> [M+H] 444.2699, found 444.2699.

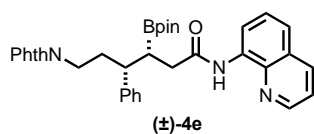

**6-(1,3-dioxisoindolin-2-yl)-4-phenyl-N-(quinolin-8-yl)-3-(4,4,5,5-tetramethyl-1,3,2-dioxaborolan-2-yl)hexanamide ((±)-4e)**: The title compound was prepared from **1e** (38.5 mg, 0.1 mmol), phenyl triflate (24.4 μL, 0.15 mmol), and

bis(pinacolato)diboron (50.8 mg, 0.2 mmol) according to the general carboboration procedure. Purification using silica gel chromatography with 3:1 to 2:1 hexanes:EtOAc as the eluent gave the product as a white solid (51.3 mg, 87% yield). **<sup>1</sup>H NMR** (400 MHz, CDCl<sub>3</sub>) δ 9.70 (s, 1H), 9.07–8.63 (m, 2H), 8.12 (dd, *J* = 7.9, 1.5 Hz, 1H), 7.89–7.70 (m, 2H), 7.70–7.60 (m, 2H), 7.54–7.37 (m, 3H), 7.35–7.28 (m, 2H), 7.28–7.20 (m, 2H), 7.16–7.05 (m, 1H), 3.68–3.40 (m, 2H), 2.88 (q, *J* = 7.4 Hz, 1H), 2.72–2.50 (m, 2H), 2.38–2.15 (m, 2H), 1.95 (q, *J* = 7.8 Hz, 1H), 1.11 (s, 6H), 1.03 (s, 6H); **<sup>13</sup>C NMR** (150 MHz, CDCl<sub>3</sub>) δ 171.5, 168.2, 147.9, 142.8, 138.2, 136.2, 134.6, 133.6, 132.1, 128.4, 128.2, 127.8, 127.4, 126.4, 122.9, 121.4, 121.0, 116.3, 83.2, 44.9, 37.8, 36.9, 32.8, 24.8, 24.6; **HRMS** (ESI-TOF) Calcd for C<sub>35</sub>H<sub>37</sub>BN<sub>3</sub>O<sub>5</sub> [M+H] 589.2863, found 589.2872.

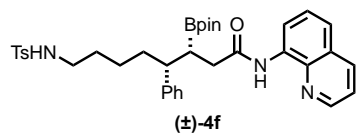

**8-((4-methylphenyl) yridine ne)-4-phenyl-N-(quinolin-8-yl)-3-(4,4,5,5-tetramethyl-1,3,2-dioxaborolan-2-yl)octanamide ((±)-4f)**: The title compound was prepared from **1f** (43.8 mg, 0.1 mmol), phenyl triflate (24.4 μL, 0.15 mmol), and

bis(pinacolato)diboron (50.8 mg, 0.2 mmol) according to the general carboboration procedure. Purification using silica gel chromatography with 1:1 hexanes:EtOAc as the eluent gave the product as a gray solid (62.8 mg, 98% yield). **<sup>1</sup>H NMR** (400 MHz, CDCl<sub>3</sub>) δ 9.73 (s, 1H), 9.22–8.52 (m, 2H), 8.29–7.97 (m, 1H), 7.70 (d, *J* = 8.1 Hz, 2H), 7.60–7.36 (m, 3H), 7.26 (dd, *J* = 11.3, 7.7 Hz, 4H), 7.18 (d, *J* = 7.3 Hz, 3H), 4.42 (t, *J* = 6.1 Hz, 1H), 2.85 (q, *J* = 6.8 Hz, 2H), 2.71–2.55 (m, 3H), 2.40 (s, 3H), 1.93 (q, *J* = 7.9 Hz, 1H), 1.86–1.72 (m, 1H), 1.70–1.53 (m, 1H), 1.40 (dddd, *J* = 22.2, 14.6, 10.7, 4.5 Hz, 2H), 1.08 (s, 6H), 1.01 (s, 6H); **<sup>13</sup>C NMR** (125 MHz, CDCl<sub>3</sub>) δ 171.7, 148.0, 144.2, 143.2, 138.3, 137.0, 136.3, 134.6, 129.6, 128.4, 128.1, 127.9, 127.4, 127.0, 126.3, 121.5, 121.1, 116.4, 83.1, 46.9, 43.0, 38.3, 34.3, 29.4, 24.8, 24.6, 24.5, 21.5; **HRMS** (ESI-TOF) Calcd for C<sub>36</sub>H<sub>45</sub>BN<sub>3</sub>O<sub>5</sub>S [M+H] 641.3209, found 641.3212.

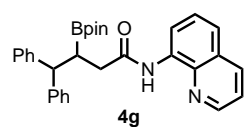

**4,4-diphenyl-N-(quinolin-8-yl)-3-(4,4,5,5-tetramethyl-1,3,2-dioxaborolan-2-yl)butanamide (4g)**: The title compound was prepared from **1g** (28.8 mg, 0.1 mmol), phenyl triflate (24.4 μL, 0.15 mmol), and bis(pinacolato)diboron (50.8 mg, 0.2 mmol) according to the general

carboboration procedure. Purification using silica gel chromatography with 5:1 hexanes:EtOAc as the eluent gave the product as a white solid (47.3 mg, 96% yield). **<sup>1</sup>H NMR** (500 MHz, CDCl<sub>3</sub>) δ 9.58 (s, 1H), 9.10–8.47 (m, 2H), 8.12 (dd, *J* = 8.3, 1.7 Hz, 1H), 7.60–7.33 (m, 7H), 7.31–7.20 (m, 4H), 7.20–7.07 (m, 2H), 3.98 (d, *J* = 12.1 Hz, 1H), 2.85–2.36 (m, 3H), 1.00 (s, 6H), 0.92 (s, 6H); **<sup>13</sup>C NMR** (125 MHz, CDCl<sub>3</sub>) δ 171.4, 147.9, 144.7,

144.4, 138.2, 136.2, 134.6, 128.7, 128.2, 128.2, 127.8, 127.6, 127.4, 126.3, 121.4, 121.1, 116.4, 83.1, 53.6, 39.6, 24.5, 24.5; **HRMS** (ESI-TOF) Calcd for C<sub>31</sub>H<sub>34</sub>BN<sub>2</sub>O<sub>3</sub> [M+H] 492.2699, found 492.2698.

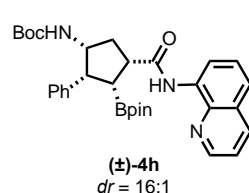

**tert-butyl (2-phenyl-4-(quinolin-8-ylcarbamoyl)-3-(4,4,5,5-tetramethyl-1,3,2-dioxaborolan-2-yl)cyclopentyl)carbamate (( $\pm$ )-**4h**):**

The title compound was prepared from **1h** (17.7 mg, 0.05 mmol), phenyl triflate (24.4  $\mu$ L, 0.15 mmol), and bis(pinacolato)diboron (38.1 mg, 0.15 mmol) according to the general carboboration procedure. Pd<sub>2</sub>(dba)<sub>3</sub> (2.3 mg, 5 mol%), Cy-JohnPhos (1.8 mg, 10 mol%), and *i*-Pr<sub>2</sub>Net (26.1  $\mu$ L, 0.15 mmol) were used in this experiment. The reaction mixture was heated at 100 °C. Purification using silica gel chromatography with 3:1 hexanes:EtOAc as the eluent gave the product as a white solid (25.6 mg, 92% yield). This product was isolated as an inseparable 16:1 mixture of diastereomers. The reported *dr* was determined by <sup>1</sup>H NMR analysis of purified **4h** and is consistent with that of the crude reaction mixture. The following analytical data correspond to the major diastereomer. **<sup>1</sup>H NMR** (500 MHz, CDCl<sub>3</sub>)  $\delta$  9.86 (s, 1H), 9.02–8.55 (m, 2H), 8.16 (dd, *J* = 8.3, 1.7 Hz, 1H), 7.58–7.44 (m, 3H), 7.43–7.37 (m, 2H), 7.30–7.23 (m, 1H), 7.16 (t, *J* = 7.3 Hz, 1H), 6.74 (d, *J* = 10.5 Hz, 1H), 4.80 (dtd, *J* = 11.0, 7.8, 3.7 Hz, 1H), 3.62 (t, *J* = 7.4 Hz, 1H), 3.35 (td, *J* = 9.9, 7.9 Hz, 1H), 2.90 (ddd, *J* = 14.0, 10.1, 8.3 Hz, 1H), 2.50 (t, *J* = 7.7 Hz, 1H), 2.21 (ddd, *J* = 13.9, 9.9, 3.8 Hz, 1H), 1.31 (s, 9H), 1.19 (s, 6H), 1.11 (s, 6H); **<sup>13</sup>C NMR** (125 MHz, CDCl<sub>3</sub>)  $\delta$  173.2, 155.8, 148.2, 139.6, 138.3, 136.3, 134.5, 128.7, 127.9, 127.7, 127.3, 125.8, 121.6, 121.3, 116.4, 83.7, 78.0, 51.5, 51.4, 49.7, 38.0, 28.4, 25.0, 24.9; **HRMS** (ESI-TOF) Calcd for C<sub>32</sub>H<sub>41</sub>BN<sub>3</sub>O<sub>5</sub> [M+H] 557.3176, found 557.3167.

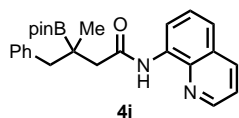

**3-methyl-4-phenyl-N-(quinolin-8-yl)-3-(4,4,5,5-tetramethyl-1,3,2-dioxaborolan-2-yl)butanamide (**4i**):**

The title compound was prepared from **1i** (11.3 mg, 0.05 mmol), phenyl triflate (12.2  $\mu$ L, 0.075 mmol), and bis(pinacolato)diboron (25.4 mg, 0.1 mmol) with Pd<sub>2</sub>(dba)<sub>3</sub> (1.4 mg, 3 mol%), Cy-JohnPhos (1.1 mg, 6 mol%), *i*-Pr<sub>2</sub>Net (17.4  $\mu$ L, 0.1 mmol), and *t*-AmylOH (0.1 mL) according to the general carboboration procedure. Purification using silica gel chromatography with 5:1 hexanes:EtOAc as the eluent gave the product as a white solid (21.3 mg, 99% yield). **<sup>1</sup>H NMR** (600 MHz, CDCl<sub>3</sub>)  $\delta$  9.68 (s, 1H), 9.09–8.51 (m, 2H), 8.14 (dd, *J* = 8.2, 1.7 Hz, 1H), 7.63–7.35 (m, 3H), 7.31–7.16 (m, 5H), 2.99–2.76 (m, 2H), 2.73–2.35 (m, 2H), 1.31 (s, 6H), 1.29 (s, 6H), 1.06 (s, 3H); **<sup>13</sup>C NMR** (150 MHz, CDCl<sub>3</sub>)  $\delta$  171.2, 148.0, 138.8, 138.3, 136.3, 134.6, 130.7, 127.9, 127.7, 127.4, 125.8, 121.5, 121.1, 116.5, 83.3, 45.9, 42.8, 24.9, 24.9, 21.1; **HRMS** (ESI-TOF) Calcd for C<sub>26</sub>H<sub>32</sub>BN<sub>2</sub>O<sub>3</sub> [M+H] 430.2542, found 430.2547.

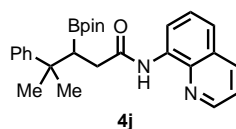

**4-methyl-4-phenyl-N-(quinolin-8-yl)-3-(4,4,5,5-tetramethyl-1,3,2-dioxaborolan-2-yl)pentanamide (**4j**):**

The title compound was prepared from **1j** (12.0 mg, 0.05 mmol), phenyl triflate (16.3  $\mu$ L, 0.1 mmol), and bis(pinacolato)diboron (38.1 mg, 0.15 mmol) with Pd<sub>2</sub>(dba)<sub>3</sub> (2.1 mg, 4.5 mol%), Cy-JohnPhos (1.7 mg, 9 mol%), *i*-Pr<sub>2</sub>Net (26.1  $\mu$ L, 0.15 mmol), and *t*-AmylOH

(0.15 mL) according to the general carboboration procedure. Purification using preparative TLC (10:1 hexanes:EtOAc) gave the product as a white solid (20.4 mg, 92% yield).  $^1\text{H NMR}$  (600 MHz,  $\text{CDCl}_3$ )  $\delta$  9.54 (s, 1H), 8.99–8.26 (m, 2H), 8.11 (dd,  $J = 8.2, 1.6$  Hz, 1H), 7.54–7.37 (m, 5H), 7.32 (t,  $J = 7.7$  Hz, 2H), 7.17 (t,  $J = 7.3$  Hz, 1H), 2.66 (dd,  $J = 15.4, 12.5$  Hz, 1H), 2.18 (dd,  $J = 15.4, 3.9$  Hz, 1H), 2.07 (dd,  $J = 12.5, 3.9$  Hz, 1H), 1.44 (d,  $J = 3.2$  Hz, 6H), 1.26 (s, 6H), 1.19 (s, 6H);  $^{13}\text{C NMR}$  (150 MHz,  $\text{CDCl}_3$ )  $\delta$  172.2, 149.8, 147.9, 138.2, 136.2, 134.8, 128.1, 127.8, 127.4, 125.9, 125.6, 121.4, 120.8, 116.1, 83.2, 38.7, 36.4, 31.4, 25.0, 24.7; **HRMS** (ESI-TOF) Calcd for  $\text{C}_{27}\text{H}_{34}\text{BN}_2\text{O}_3$  [ $\text{M}+\text{H}$ ] 444.2699, found 444.2694.

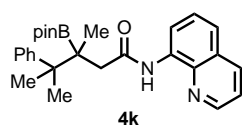

**3,4-dimethyl-4-phenyl-*N*-(quinolin-8-yl)-3-(4,4,5,5-tetramethyl-1,3,2-dioxaborolan-2-yl)pentanamide (4k):** The title compound was prepared from **1k** (12.7 mg, 0.05 mmol), phenyl triflate (16.3  $\mu\text{L}$ , 0.1 mmol), and bis(pinacolato)diboron (38.1 mg, 0.15 mmol) with  $\text{Pd}_2(\text{dba})_3$  (2.1 mg, 4.5 mol%), Cy-JohnPhos (1.7 mg, 9 mol%), *i*-Pr<sub>2</sub>Net (26.1  $\mu\text{L}$ , 0.15 mmol), *t*-AmylOH (0.15 mL) according to the general carboboration procedure. Purification using preparative TLC (10:1 hexanes:EtOAc) gave the product as a white solid (14.0 mg, 61% yield).  $^1\text{H NMR}$  (600 MHz,  $\text{CDCl}_3$ )  $\delta$  9.55 (s, 1H), 8.82–8.66 (m, 2H), 8.12 (dd,  $J = 8.3, 1.7$  Hz, 1H), 7.53–7.37 (m, 5H), 7.34 (t,  $J = 7.8$  Hz, 2H), 7.25–7.16 (m, 1H), 3.17 (d,  $J = 15.1$  Hz, 1H), 2.05 (d,  $J = 15.1$  Hz, 1H), 1.54 (s, 3H), 1.49 (s, 3H), 1.36 (s, 6H), 1.30 (s, 6H), 0.99 (s, 3H);  $^{13}\text{C NMR}$  (150 MHz,  $\text{CDCl}_3$ )  $\delta$  171.8, 147.9, 146.6, 138.2, 136.3, 134.8, 128.3, 127.9, 127.4, 127.2, 125.6, 121.4, 120.9, 116.3, 83.3, 43.8, 41.9, 26.6, 26.0, 25.4, 25.3, 18.4; **HRMS** (ESI-TOF) Calcd for  $\text{C}_{28}\text{H}_{36}\text{BN}_2\text{O}_3$  [ $\text{M}+\text{H}$ ] 458.2855, found 458.2853.

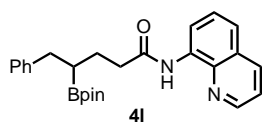

**5-phenyl-*N*-(quinolin-8-yl)-4-(4,4,5,5-tetramethyl-1,3,2-dioxaborolan-2-yl)pentanamide (4l):** The title compound was prepared from **1l** (22.6 mg, 0.1 mmol), phenyl triflate (24.4  $\mu\text{L}$ , 0.15 mmol), and bis(pinacolato)diboron (50.8 mg, 0.2 mmol) with *t*-AmylOH (0.4 mL) according to the general carboboration procedure. Purification using silica gel chromatography with 10:1 to 5:1 hexanes:EtOAc as the eluent gave the product as a colorless oil (42.2 mg, 98% yield).  $^1\text{H NMR}$  (400 MHz,  $\text{CDCl}_3$ )  $\delta$  10.00–9.46 (m, 1H), 9.03–8.57 (m, 2H), 8.18 (dd,  $J = 8.3, 1.7$  Hz, 1H), 7.67–7.39 (m, 3H), 7.28–7.22 (m, 4H), 7.16 (ddd,  $J = 8.7, 5.0, 3.9$  Hz, 1H), 2.92–2.73 (m, 2H), 2.72–2.48 (m, 2H), 1.98 (dtd,  $J = 8.9, 6.8, 2.1$  Hz, 2H), 1.52 (p,  $J = 7.9$  Hz, 1H), 1.23 (s, 6H), 1.21 (s, 6H);  $^{13}\text{C NMR}$  (125 MHz,  $\text{CDCl}_3$ )  $\delta$  171.7, 148.0, 141.8, 138.4, 136.3, 134.6, 128.9, 128.1, 127.9, 127.4, 125.7, 121.5, 121.2, 116.4, 83.2, 37.8, 37.1, 27.0, 24.8, 24.8; **HRMS** (ESI-TOF) Calcd for  $\text{C}_{26}\text{H}_{32}\text{BN}_2\text{O}_3$  [ $\text{M}+\text{H}$ ] 430.2542, found 430.2542.

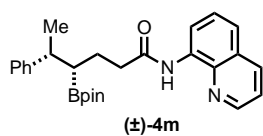

**5-phenyl-*N*-(quinolin-8-yl)-4-(4,4,5,5-tetramethyl-1,3,2-dioxaborolan-2-yl)hexanamide ((±)-4m):** The title compound was prepared from **1m** (24.0 mg, 0.1 mmol), phenyl triflate (24.4  $\mu\text{L}$ , 0.15 mmol), and bis(pinacolato)diboron (50.8 mg, 0.2 mmol) with *t*-AmylOH (0.4 mL) according to the general carboboration procedure. Purification using silica gel chromatography with 10:1 to 5:1 hexanes:EtOAc as the eluent gave the product as a



colorless oil (37.8 mg, 85% yield). **<sup>1</sup>H NMR** (600 MHz, CDCl<sub>3</sub>) δ 9.71 (s, 1H), 9.06–8.61 (m, 2H), 8.14 (dd, *J* = 8.3, 1.7 Hz, 1H), 7.74–7.36 (m, 3H), 7.29–7.23 (m, 2H), 7.22–7.19 (m, 2H), 7.17–7.12 (m, 1H), 2.85 (dq, *J* = 10.5, 6.9 Hz, 1H), 2.50 (ddd, *J* = 14.6, 10.1, 5.7 Hz, 1H), 2.38 (ddd, *J* = 14.6, 9.9, 6.9 Hz, 1H), 1.80–1.65 (m, 2H), 1.42–1.35 (m, 1H), 1.34–1.31 (m, 12H), 1.29 (d, *J* = 6.9 Hz, 3H); **<sup>13</sup>C NMR** (150 MHz, CDCl<sub>3</sub>) δ 171.6, 147.9, 147.0, 138.4, 136.3, 134.6, 128.4, 127.9, 127.4, 127.3, 125.9, 121.5, 121.2, 116.3, 83.4, 41.4, 37.8, 26.0, 25.0, 25.0, 22.7; **HRMS** (ESI-TOF) Calcd for C<sub>27</sub>H<sub>34</sub>BN<sub>2</sub>O<sub>3</sub> [M+H] 444.2699, found 444.2701.

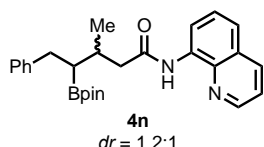

**3-methyl-5-phenyl-*N*-(quinolin-8-yl)-4-(4,4,5,5-tetramethyl-1,3,2-dioxaborolan-2-yl)pentanamide (4n):** The title compound was prepared from **1n** (24.0 mg, 0.1 mmol), phenyl triflate (24.4 μL, 0.15 mmol), and bis(pinacolato)diboron (50.8 mg, 0.2 mmol) according to the general carboboration procedure. Purification using silica gel chromatography with 10:1 to 5:1 hexanes:EtOAc as the eluent gave the product as a yellow oil (44.0 mg, 99% yield). This product was isolated as an inseparable 1.2:1 mixture of diastereomers. The reported *dr* was determined by <sup>1</sup>H NMR analysis of purified **4n** and is consistent with that of the crude reaction mixture. The following analytical data correspond to the mixture. **<sup>1</sup>H NMR** (600 MHz, CDCl<sub>3</sub>) δ 10.16–9.61 (m, 1H), 9.10–8.51 (m, 2H), 8.16 (ddd, *J* = 8.3, 4.8, 1.7 Hz, 1H), 7.68–7.35 (m, 3H), 7.26–7.17 (m, 4H), 7.17–7.08 (m, 1H), 2.96–2.68 (m, 3H), 2.57–2.30 (m, 2H), 1.60–1.47 (m, 1H), 1.24–1.03 (m, 15H); **<sup>13</sup>C NMR** (150 MHz, CDCl<sub>3</sub>) δ 171.5, 171.5, 148.0, 148.0, 142.1, 142.0, 138.5, 138.4, 136.3, 136.3, 134.7, 134.7, 129.0, 128.9, 128.1, 128.0, 128.0, 127.9, 127.4, 125.6, 125.6, 121.5, 121.5, 121.3, 116.5, 116.4, 83.2, 45.6, 44.2, 35.4, 34.6, 32.8, 32.6, 24.9, 24.9, 24.8, 24.8, 19.8, 18.5; **HRMS** (ESI-TOF) Calcd for C<sub>27</sub>H<sub>34</sub>BN<sub>2</sub>O<sub>3</sub> [M+H] 444.2699, found 444.2697.

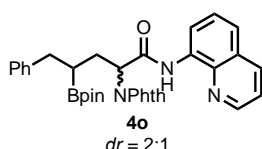

**2-(1,3-dioxoisindolin-2-yl)-5-phenyl-*N*-(quinolin-8-yl)-4-(4,4,5,5-tetramethyl-1,3,2-dioxaborolan-2-yl)pentanamide (4o):** The title compound was prepared from **1o** (37.1 mg, 0.1 mmol), phenyl triflate (24.4 μL, 0.15 mmol), and bis(pinacolato)diboron (50.8 mg, 0.2 mmol) according to the general carboboration procedure. Purification using silica gel chromatography with 3:1 to 1:1 hexanes:EtOAc as the eluent gave the product as a brown solid (57.0 mg, 99% yield). This product was isolated as an inseparable 2:1 mixture of diastereomers. The reported *dr* was determined by <sup>1</sup>H NMR analysis of purified **4o** and is consistent with that of the crude reaction mixture. The following analytical data correspond to the mixture. **<sup>1</sup>H NMR** (500 MHz, CDCl<sub>3</sub>) δ 10.53–10.06 (m, 1H), 8.93–8.45 (m, 2H), 8.21–8.03 (m, 1H), 7.93–7.81 (m, 2H), 7.77–7.67 (m, 2H), 7.54–7.38 (m, 3H), 7.30–7.07 (m, 5H), 5.39–5.16 (m, 1H), 3.22–2.36 (m, 4H), 1.63–1.38 (m, 1H), 1.28–0.90 (m, 12H); **<sup>13</sup>C NMR** (125 MHz, CDCl<sub>3</sub>) δ 168.1, 168.0, 167.3, 167.1, 148.2, 148.2, 141.1, 140.9, 138.5, 136.2, 134.1, 134.0, 134.0, 132.0, 132.0, 129.0, 128.9, 128.2, 128.1, 127.8, 127.2, 125.9, 125.8, 123.5, 123.4, 121.8, 121.7, 121.5, 116.7, 116.6, 83.6, 83.4, 55.1, 54.5, 37.4, 36.4, 30.2, 29.7, 25.1, 24.7, 24.6; **HRMS** (ESI-TOF) Calcd for C<sub>34</sub>H<sub>35</sub>BN<sub>3</sub>O<sub>5</sub> [M+H] 575.2706, found 575.2708.

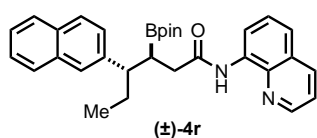

**4-(naphthalen-2-yl)-N-(quinolin-8-yl)-3-(4,4,5,5-tetramethyl-1,3,2-dioxaborolan-2-yl)hexanamide ((±)-4r):** The title compound was prepared from **1c** (24.0 mg, 0.1 mmol), naphthalen-2-yl trifluoromethanesulfonate (41.4 mg, 0.15 mmol), and bis(pinacolato)diboron (50.8 mg, 0.2 mmol) according to the general carboboration procedure. Purification using silica gel chromatography with 10:1 to 5:1 hexanes:EtOAc as the eluent gave the product as a white solid (48.4 mg, 98% yield). **<sup>1</sup>H NMR** (600 MHz, CDCl<sub>3</sub>) δ 9.74 (s, 1H), 8.97–8.63 (m, 2H), 8.11 (dd, *J* = 8.2, 1.7 Hz, 1H), 7.84–7.64 (m, 4H), 7.55–7.36 (m, 6H), 2.84 (ddd, *J* = 10.3, 7.7, 4.2 Hz, 1H), 2.76–2.62 (m, 2H), 2.09 (q, *J* = 7.9 Hz, 1H), 2.05–1.94 (m, 1H), 1.91–1.79 (m, 1H), 1.05 (s, 6H), 0.96 (s, 6H), 0.79 (t, *J* = 7.3 Hz, 3H); **<sup>13</sup>C NMR** (150 MHz, CDCl<sub>3</sub>) δ 171.9, 147.9, 141.9, 138.3, 136.2, 134.7, 133.4, 132.3, 127.8, 127.6, 127.6, 127.4, 127.4, 127.2, 127.0, 125.6, 125.0, 121.4, 121.0, 116.3, 83.0, 49.1, 38.4, 27.6, 24.7, 24.6, 12.3; **HRMS** (ESI-TOF) Calcd for C<sub>31</sub>H<sub>36</sub>BN<sub>2</sub>O<sub>3</sub> [M+H] 494.2855, found 494.2859.

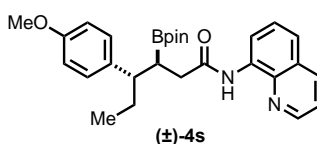

**4-(4-methoxyphenyl)-N-(quinolin-8-yl)-3-(4,4,5,5-tetramethyl-1,3,2-dioxaborolan-2-yl)hexanamide ((±)-4s):** The title compound was prepared from **1c** (24.0 mg, 0.1 mmol), 4-methoxyphenyl trifluoromethanesulfonate (27 μL, 0.15 mmol), and bis(pinacolato)diboron (50.8 mg, 0.2 mmol) according to the general carboboration procedure. Purification using silica gel chromatography with 5:1 hexanes:EtOAc as the eluent gave the product as a white solid (46.9 mg, 99% yield). **<sup>1</sup>H NMR** (500 MHz, CDCl<sub>3</sub>) δ 9.74 (s, 1H), 9.14–8.57 (m, 2H), 8.14 (dd, *J* = 8.3, 1.7 Hz, 1H), 7.61–7.32 (m, 3H), 7.21–7.03 (m, 2H), 6.92–6.54 (m, 2H), 3.78 (s, 3H), 2.98–2.44 (m, 3H), 2.08–1.83 (m, 2H), 1.67 (tdd, *J* = 14.3, 11.2, 8.1 Hz, 1H), 1.09 (s, 6H), 1.03 (s, 6H), 0.75 (t, *J* = 7.3 Hz, 3H); **<sup>13</sup>C NMR** (125 MHz, CDCl<sub>3</sub>) δ 172.0, 158.0, 147.9, 138.3, 136.5, 136.2, 134.7, 129.5, 127.9, 127.4, 121.4, 121.0, 116.3, 113.4, 83.0, 55.2, 48.1, 38.4, 27.9, 24.8, 24.6, 12.2; **HRMS** (ESI-TOF) Calcd for C<sub>28</sub>H<sub>36</sub>BN<sub>2</sub>O<sub>4</sub> [M+H] 474.2804, found 474.2799.

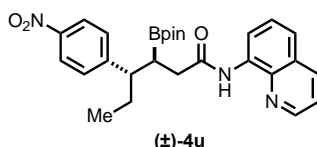

**4-(4-nitrophenyl)-N-(quinolin-8-yl)-3-(4,4,5,5-tetramethyl-1,3,2-dioxaborolan-2-yl)hexanamide ((±)-4u):** The title compound was prepared from **1c** (24.0 mg, 0.1 mmol), 4-nitrophenyl trifluoromethanesulfonate (40.7 mg, 0.15 mmol), and bis(pinacolato)diboron (50.8 mg, 0.2 mmol) with *t*-AmylOH (0.4 mL) according to the general carboboration procedure. Purification using silica gel chromatography with 3:1 to 2:1 hexanes:EtOAc as the eluent gave the product as a white solid (47.9 mg, 98% yield). **<sup>1</sup>H NMR** (600 MHz, CDCl<sub>3</sub>) δ 9.73 (s, 1H), 8.99–8.53 (m, 2H), 8.33–7.94 (m, 3H), 7.56–7.35 (m, 5H), 2.82 (ddd, *J* = 10.2, 8.1, 4.3 Hz, 1H), 2.76–2.62 (m, 2H), 2.11–1.91 (m, 2H), 1.73 (ddq, *J* = 14.4, 10.3, 7.3 Hz, 1H), 1.10 (s, 6H), 1.03 (s, 6H), 0.75 (t, *J* = 7.3 Hz, 3H); **<sup>13</sup>C NMR** (150 MHz, CDCl<sub>3</sub>) δ 171.3, 152.8, 148.1, 146.5, 138.2, 136.3, 134.5, 129.5, 127.9, 127.4, 123.3, 121.6, 121.3, 116.4, 83.3, 48.7, 38.0, 27.6, 24.8, 24.6, 12.0; **HRMS** (ESI-TOF) Calcd for C<sub>27</sub>H<sub>33</sub>BN<sub>3</sub>O<sub>5</sub> [M+H] 489.2550, found 489.2546; **X-ray** (single-crystal) Colorless block crystals of X-ray diffraction quality were obtained by vapor diffusion of pentane into a saturated solution of (±)-**4u** in CH<sub>2</sub>Cl<sub>2</sub> (CCDC 1939487).<sup>[15]</sup>

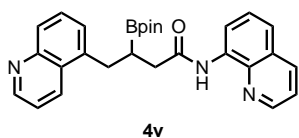

**4-(quinolin-5-yl)-N-(quinolin-8-yl)-3-(4,4,5,5-tetramethyl-1,3,2-dioxaborolan-2-yl)butanamide (4v):** The title compound was prepared from **1a** (21.2 mg, 0.1 mmol), quinolin-5-yl trifluoromethanesulfonate (27.3  $\mu$ L, 0.15 mmol), and

bis(pinacolato)diboron (50.8 mg, 0.2 mmol) according to the general carboboration procedure. Purification using silica gel chromatography with 2:1 hexanes:EtOAc as the eluent gave the product as a yellow solid (32.7 mg, 70% yield).  $^1\text{H NMR}$  (500 MHz,  $\text{CDCl}_3$ )  $\delta$  9.67 (s, 1H), 8.88–8.70 (m, 3H), 8.51 (d,  $J = 8.5$  Hz, 1H), 8.14 (dd,  $J = 8.3, 1.7$  Hz, 1H), 7.96 (d,  $J = 8.4$  Hz, 1H), 7.59 (dd,  $J = 8.5, 7.0$  Hz, 1H), 7.56–7.39 (m, 4H), 7.33 (dd,  $J = 8.5, 4.2$  Hz, 1H), 3.51–3.06 (m, 2H), 2.74–2.58 (m, 2H), 1.94 (dq,  $J = 9.1, 6.9$  Hz, 1H), 1.24 (s, 6H), 1.21 (s, 6H);  $^{13}\text{C NMR}$  (125 MHz,  $\text{CDCl}_3$ )  $\delta$  171.2, 149.8, 148.8, 148.0, 138.3, 138.2, 136.3, 134.5, 132.7, 128.8, 128.0, 127.9, 127.4, 127.2, 127.2, 121.5, 121.2, 120.7, 116.4, 83.4, 38.6, 32.3, 24.8; **HRMS** (ESI-TOF) Calcd for  $\text{C}_{28}\text{H}_{30}\text{BN}_3\text{O}_3$  [ $\text{M}+\text{H}$ ] 467.2495, found 467.2487.

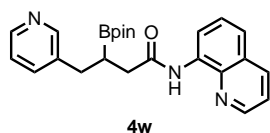

**4-(pyridine-3-yl)-N-(quinolin-8-yl)-3-(4,4,5,5-tetramethyl-1,3,2-dioxaborolan-2-yl)butanamide (4w):** The title compound was prepared from **1a** (21.2 mg, 0.1 mmol), pyridine-3-yl trifluoromethanesulfonate (24.1  $\mu$ L, 0.15 mmol), and

bis(pinacolato)diboron (50.8 mg, 0.2 mmol) according to the general carboboration procedure. Purification using silica gel chromatography with 1:1 hexanes:EtOAc as the eluent gave the product as a yellow oil (25.9 mg, 62% yield).  $^1\text{H NMR}$  (600 MHz,  $\text{CDCl}_3$ )  $\delta$  9.73 (s, 1H), 8.82–8.66 (m, 2H), 8.51 (d,  $J = 2.2$  Hz, 1H), 8.43 (dd,  $J = 4.8, 1.6$  Hz, 1H), 8.15 (dd,  $J = 8.2, 1.7$  Hz, 1H), 7.59 (dt,  $J = 7.8, 2.0$  Hz, 1H), 7.56–7.46 (m, 2H), 7.44 (dd,  $J = 8.2, 4.2$  Hz, 1H), 7.19 (dd,  $J = 7.8, 4.8$  Hz, 1H), 3.06–2.72 (m, 2H), 2.72–2.56 (m, 2H), 1.83 (p,  $J = 7.4$  Hz, 1H), 1.22 (s, 6H), 1.20 (s, 6H);  $^{13}\text{C NMR}$  (150 MHz,  $\text{CDCl}_3$ )  $\delta$  171.1, 150.4, 148.1, 147.4, 138.3, 136.9, 136.4, 136.3, 134.5, 127.9, 127.4, 123.2, 121.5, 121.3, 116.4, 83.4, 38.4, 33.2, 24.7; **HRMS** (ESI-TOF) Calcd for  $\text{C}_{24}\text{H}_{29}\text{BN}_3\text{O}_3$  [ $\text{M}+\text{H}$ ] 417.2338, found 417.2338.

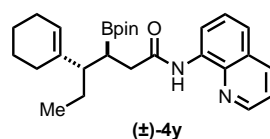

**4-(cyclohex-1-en-1-yl)-N-(quinolin-8-yl)-3-(4,4,5,5-tetramethyl-1,3,2-dioxaborolan-2-yl)hexanamide (( $\pm$ )-4y):** The title compound was prepared from **1c** (24.0 mg, 0.1 mmol), cyclohex-1-en-1-yl trifluoromethanesulfonate (26.3  $\mu$ L, 0.15 mmol), and

bis(pinacolato)diboron (50.8 mg, 0.2 mmol) according to the general carboboration procedure. Purification using silica gel chromatography with 10:1 to 5:1 hexanes:EtOAc as the eluent gave the product as a yellow oil (38.6 mg, 86% yield).  $^1\text{H NMR}$  (600 MHz,  $\text{CDCl}_3$ )  $\delta$  9.76 (s, 1H), 8.93–8.54 (m, 2H), 8.14 (dt,  $J = 8.3, 1.5$  Hz, 1H), 7.71–7.38 (m, 3H), 5.43 (td,  $J = 3.6, 1.8$  Hz, 1H), 2.78–2.50 (m, 2H), 2.13–1.93 (m, 4H), 1.87 (s, 1H), 1.73–1.50 (m, 6H), 1.37 (ddq,  $J = 14.3, 10.8, 7.2$  Hz, 1H), 1.21 (s, 6H), 1.17 (s, 6H), 0.79 (t,  $J = 7.3$  Hz, 3H);  $^{13}\text{C NMR}$  (150 MHz,  $\text{CDCl}_3$ )  $\delta$  172.4, 147.9, 139.0, 138.3, 136.2, 134.8, 127.9, 127.5, 123.1, 121.4, 120.9, 116.3, 82.9, 50.7, 38.4, 25.3, 25.0, 25.0, 24.7, 24.1, 22.9, 22.8, 12.1; **HRMS** (ESI-TOF) Calcd for  $\text{C}_{27}\text{H}_{38}\text{BN}_2\text{O}_3$  [ $\text{M}+\text{H}$ ] 448.3012, found 448.3007.

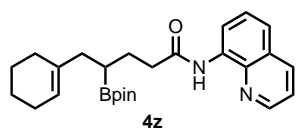

**5-(cyclohex-1-en-1-yl)-N-(quinolin-8-yl)-4-(4,4,5,5-tetramethyl-1,3,2-dioxaborolan-2-yl)pentanamide (4z):** The title compound was prepared from **11** (22.6 mg, 0.1 mmol), cyclohex-1-en-1-yl trifluoromethanesulfonate (26.3  $\mu$ L, 0.15 mmol), and

bis(pinacolato)diboron (50.8 mg, 0.2 mmol) according to the general carboboration procedure. Purification using silica gel chromatography with 10:1 to 5:1 hexanes:EtOAc as the eluent gave the product as a yellow oil (40.0 mg, 92% yield).  $^1\text{H NMR}$  (500 MHz,  $\text{CDCl}_3$ )  $\delta$  9.83 (s, 1H), 9.06–8.63 (m, 2H), 8.15 (dd,  $J = 8.2, 1.7$  Hz, 1H), 7.69–7.36 (m, 3H), 5.45 (dt,  $J = 3.9, 2.2$  Hz, 1H), 2.69–2.46 (m, 2H), 2.21–2.02 (m, 2H), 2.02–1.76 (m, 6H), 1.62–1.47 (m, 4H), 1.40–1.28 (m, 1H), 1.26 (s, 12H);  $^{13}\text{C NMR}$  (125 MHz,  $\text{CDCl}_3$ )  $\delta$  172.0, 148.0, 138.4, 137.1, 136.3, 134.7, 127.9, 127.5, 121.8, 121.5, 121.2, 116.4, 83.1, 39.6, 37.9, 28.2, 27.1, 25.2, 24.9, 24.9, 23.0, 22.6; **HRMS** (ESI-TOF) Calcd for  $\text{C}_{26}\text{H}_{36}\text{BN}_2\text{O}_3$  [ $\text{M}+\text{H}$ ] 434.2855, found 434.2852.

**General Procedure for Boronate Oxidation:**<sup>[1]</sup> The alkene substrate was carboborylated according to the general procedure and was filtered and concentrated to obtain the crude boronate ester product. The crude boronate ester,  $\text{NaBO}_3 \cdot 4\text{H}_2\text{O}$  (77 mg, 0.5 mmol), THF (0.5 mL), and  $\text{H}_2\text{O}$  (0.5 mL) were added to a 10-mL round-bottom flask containing a Teflon-coated magnetic stir bar. The reaction mixture was stirred at room temperature for at least 3 h until the boronate ester was completely consumed. The aqueous layer was then washed with  $\text{Et}_2\text{O}$  ( $2 \times 5$  mL). The combined organic layers were dried over  $\text{Na}_2\text{SO}_4$ , filtered, and concentrated under vacuum. The residue was purified by preparative TLC to afford the pure product.

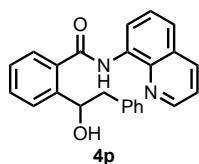

**2-(1-hydroxy-2-phenylethyl)-N-(quinolin-8-yl)benzamide (4p):** The title compound was prepared from **1p** (27.4 mg, 0.1 mmol), phenyl triflate (32.5  $\mu$ L, 0.2 mmol), and bis(pinacolato)diboron (76.2 mg, 0.3 mmol) with

$\text{Pd}_2(\text{dba})_3$  (4.2 mg, 4.5 mol%), Cy-JohnPhos (3.3 mg, 9 mol%),  $i\text{-Pr}_2\text{Net}$  (52.2  $\mu$ L, 0.15 mmol), and  $t\text{-AmylOH}$  (0.3 mL) according to the general carboboration/oxidation procedure. Purification by preparative TLC (3:1 hexanes:EtOAc) gave the product as a colorless oil (25.8 mg, 70% yield).  $^1\text{H NMR}$  (500 MHz,  $\text{CDCl}_3$ )  $\delta$  10.42 (s, 1H), 8.94 (dd,  $J = 7.4, 1.6$  Hz, 1H), 8.77 (dd,  $J = 4.2, 1.7$  Hz, 1H), 8.23 (dd,  $J = 8.3, 1.7$  Hz, 1H), 7.80 (dd,  $J = 7.6, 1.3$  Hz, 1H), 7.72–7.59 (m, 3H), 7.56 (td,  $J = 7.6, 1.4$  Hz, 1H), 7.52–7.43 (m, 2H), 7.28–7.22 (m, 4H), 7.18–7.13 (m, 1H), 5.31 (dt,  $J = 8.7, 4.0$  Hz, 1H), 4.33–4.01 (m, 1H), 3.24 (qd,  $J = 13.6, 6.9$  Hz, 2H);  $^{13}\text{C NMR}$  (125 MHz,  $\text{CDCl}_3$ )  $\delta$  168.6, 148.4, 143.1, 138.7, 138.7, 136.5, 135.4, 134.4, 131.1, 129.5, 128.3, 128.0, 127.9, 127.8, 127.6, 127.4, 126.3, 122.3, 121.7, 117.1, 73.3, 43.8; **HRMS** (ESI-TOF) Calcd for  $\text{C}_{24}\text{H}_{21}\text{N}_2\text{O}_2$  [ $\text{M}+\text{H}$ ] 369.1603, found 369.1597.

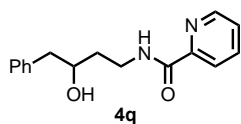

**N-(3-hydroxy-4-phenylbutyl)picolinamide (4q):** The title compound was prepared from **1q** (17.6 mg, 0.1 mmol), phenyl triflate (24.4  $\mu$ L, 0.15 mmol), and bis(pinacolato)diboron (50.8 mg, 0.2 mmol) with  $t\text{-AmylOH}$  (0.4 mL) according to the general carboboration/oxidation

procedure. Purification by preparative TLC (1:1 hexanes:EtOAc) gave the product as a yellow solid (14.6 mg, 54% yield).  $^1\text{H NMR}$  (500 MHz,  $\text{CDCl}_3$ )  $\delta$  8.56 (ddd,  $J = 4.8, 1.7, 0.9$

Hz, 1H), 8.36 (s, 1H), 8.20 (dt,  $J = 7.8, 1.1$  Hz, 1H), 7.87 (td,  $J = 7.7, 1.7$  Hz, 1H), 7.44 (ddd,  $J = 7.6, 4.8, 1.3$  Hz, 1H), 7.35–7.27 (m, 2H), 7.26–7.16 (m, 3H), 4.06–3.81 (m, 2H), 3.44 (dq,  $J = 14.0, 5.3$  Hz, 1H), 3.33 (d,  $J = 3.5$  Hz, 1H), 2.93–2.65 (m, 2H), 1.93–1.79 (m, 1H), 1.78–1.66 (m, 1H);  $^{13}\text{C NMR}$  (125 MHz,  $\text{CDCl}_3$ )  $\delta$  165.2, 149.6, 148.1, 138.5, 137.4, 129.5, 128.4, 126.4, 126.2, 122.3, 69.8, 43.8, 36.8, 36.4; **HRMS** (ESI-TOF) Calcd for  $\text{C}_{16}\text{H}_{19}\text{N}_2\text{O}_2$  [ $\text{M}+\text{H}$ ] 271.1447, found 271.1447.

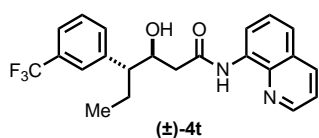

**3-hydroxy-*N*-(quinolin-8-yl)-4-(3-(trifluoromethyl)phenyl)hexanamide ((±)-4t):** The title compound was prepared from **1c** (24.0 mg, 0.1 mmol), 3-(trifluoromethyl)phenyl trifluoromethanesulfonate (40  $\mu\text{L}$ , 0.2

mmol), and bis(pinacolato)diboron (76.2 mg, 0.3 mmol) with *t*-AmylOH (0.6 mL) according to the general carboboration/oxidation procedure. Purification by preparative TLC (3:1 hexanes:EtOAc) gave the product as a white solid (33.4 mg, 83% yield).  $^1\text{H NMR}$  (500 MHz,  $\text{CDCl}_3$ )  $\delta$  9.90 (s, 1H), 8.78 (dd,  $J = 4.3, 1.7$  Hz, 1H), 8.70 (dd,  $J = 5.9, 3.1$  Hz, 1H), 8.15 (dd,  $J = 8.4, 1.7$  Hz, 1H), 7.68–7.39 (m, 7H), 4.48 (ddd,  $J = 9.8, 5.1, 2.4$  Hz, 1H), 3.57 (s, 1H), 2.74–2.60 (m, 2H), 2.49 (dd,  $J = 15.5, 9.7$  Hz, 1H), 2.06–1.90 (m, 1H), 1.89–1.75 (m, 1H), 0.84 (t,  $J = 7.4$  Hz, 3H);  $^{13}\text{C NMR}$  (125 MHz,  $\text{CDCl}_3$ )  $\delta$  170.9, 148.2, 142.3, 138.3, 136.4, 134.0, 132.7, 130.5 (q,  $J = 32.1$  Hz), 128.7, 127.9, 127.3, 125.9 (q,  $J = 4.0$  Hz), 124.3 (q,  $J = 273.4$  Hz), 123.6 (q,  $J = 3.7$  Hz), 121.9, 121.6, 116.9, 70.9, 53.2, 42.4, 25.2, 12.1;  $^{19}\text{F NMR}$  (376 MHz,  $\text{CDCl}_3$ )  $\delta$  -62.6; **HRMS** (ESI-TOF) Calcd for  $\text{C}_{22}\text{H}_{22}\text{F}_3\text{N}_2\text{O}_2$  [ $\text{M}+\text{H}$ ] 403.1633, found 403.1637.

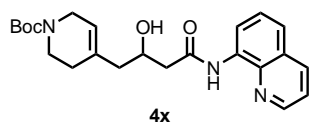

**tert-butyl 4-(2-hydroxy-4-oxo-4-(quinolin-8-ylamino)butyl)-3,6-dihydropyridine-1(2H)-carboxylate (4x):** The title compound was prepared from **1a** (21.2 mg, 0.1 mmol), *tert*-butyl 4-(((trifluoromethyl)sulfonyl)oxy)-3,6-dihydropyridine-1(2H)-carboxylate (49.7 mg, 0.15 mmol), and bis(pinacolato)diboron (50.8 mg, 0.2 mmol) according to the general carboboration/oxidation procedure. Purification by preparative TLC (1:1 hexanes:EtOAc) gave the product as a yellow solid (25.1 mg, 61% yield).  $^1\text{H NMR}$  (500 MHz,  $\text{CDCl}_3$ )  $\delta$  10.02 (s, 1H), 8.81 (dd,  $J = 4.2, 1.7$  Hz, 1H), 8.74 (dd,  $J = 6.4, 2.6$  Hz, 1H), 8.16 (dd,  $J = 8.3, 1.7$  Hz, 1H), 7.63–7.38 (m, 3H), 5.53 (s, 1H), 4.33 (d,  $J = 8.1$  Hz, 1H), 3.90 (s, 2H), 3.65–3.33 (m, 3H), 2.94–2.52 (m, 2H), 2.47–2.04 (m, 4H), 1.47 (s, 9H);  $^{13}\text{C NMR}$  (125 MHz,  $\text{CDCl}_3$ )  $\delta$  170.8, 148.3, 138.4, 136.4, 134.1, 128.0, 127.3, 121.9, 121.7, 116.8, 79.5, 66.5, 44.8, 43.6, 28.6, 28.5; **HRMS** (ESI-TOF) Calcd for  $\text{C}_{23}\text{H}_{30}\text{N}_3\text{O}_4$  [ $\text{M}+\text{H}$ ] 412.2236, found 412.2237.

## General Procedure for Dearomative Aryl- and Alkenylboration of Heterocycles

**General Procedure:** To a 4-mL scintillation vial equipped with a Teflon-coated magnetic stir bar were added the heterocycle substrate (0.05 mmol), bis(pinacolato)diboron (38.1 mg, 0.15 mmol), Pd<sub>2</sub>(dba)<sub>3</sub> (2.3 mg, 5 mol%), Cy-JohnPhos (1.8 mg, 10 mol%), and 4 Å molecular sieves (~30 mg). The vial was sealed with a screw-top septum cap and was then evacuated and backfilled with N<sub>2</sub> (×3). Under positive N<sub>2</sub> pressure, aryl or alkenyl triflate (0.15 mmol), *i*-Pr<sub>2</sub>Net (26.1 μL, 0.15 mmol) and *t*-AmylOH (0.2 mL) were added. All needle inlets/outlets were removed, and the reaction was placed in a heating block that was preheated to 100 °C. (To prevent solvent evaporation through the punctures in the septum, at this stage we typically switch the old cap for new cap under a flow of N<sub>2</sub> gas.) After 40–44 hours, the black reaction mixture was allowed to cool to room temperature and filtered through a short plug of celite (CH<sub>2</sub>Cl<sub>2</sub> or EtOAc as eluent). The solvent was removed in *vacuo* to afford a dark brown residue. Upon purification by preparative TLC with 5:1 hexanes:EtOAc as the eluent, afforded the pure product.

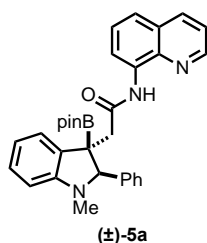

**2-(1-methyl-2-phenyl-3-(4,4,5,5-tetramethyl-1,3,2-dioxaborolan-2-yl)indolin-3-yl)-N-(quinolin-8-yl)acetamide ((±)-5a):** The title compound was prepared from **1t** (15.7 mg, 0.05 mmol), phenyl triflate (24.4 μL, 0.15 mmol), and bis(pinacolato)diboron (38.1 mg, 0.15 mmol) according to the general dearomative carboboration procedure. Purification by preparative TLC (5:1 hexanes:EtOAc) gave the product as a yellow oil (16.4 mg, 63% yield). (Note: In this case, it was necessary to pre-treat the PTLC plate with Net<sub>3</sub> prior to loading on the crude product in order to prevent decomposition on silica gel.) <sup>1</sup>H NMR (600 MHz, CDCl<sub>3</sub>) δ 9.59 (s, 1H), 8.77 (dd, *J* = 7.6, 1.3 Hz, 1H), 8.70 (dd, *J* = 4.2, 1.7 Hz, 1H), 8.11 (dd, *J* = 8.2, 1.7 Hz, 1H), 7.56–7.48 (m, 1H), 7.45 (dd, *J* = 8.2, 1.4 Hz, 1H), 7.39 (dd, *J* = 8.3, 4.2 Hz, 1H), 7.36 (dd, *J* = 7.3, 1.2 Hz, 1H), 7.25–7.17 (m, 5H), 7.05 (td, *J* = 7.6, 1.3 Hz, 1H), 6.63 (td, *J* = 7.4, 1.0 Hz, 1H), 6.39 (d, *J* = 7.7 Hz, 1H), 4.50 (s, 1H), 3.31 (d, *J* = 15.1 Hz, 1H), 3.13 (d, *J* = 15.1 Hz, 1H), 2.59 (s, 3H), 0.94 (s, 6H), 0.92 (s, 6H); <sup>13</sup>C NMR (150 MHz, CDCl<sub>3</sub>) δ 170.1, 151.8, 147.9, 139.3, 138.3, 136.1, 134.7, 133.9, 128.0, 127.8, 127.7, 127.5, 127.3, 126.0, 121.4, 121.0, 117.4, 116.4, 105.3, 83.4, 78.2, 47.4, 32.7, 24.8, 24.7; HRMS (ESI-TOF) Calcd for C<sub>32</sub>H<sub>35</sub>BN<sub>3</sub>O<sub>3</sub> [M+H] 519.2808, found 519.2826.

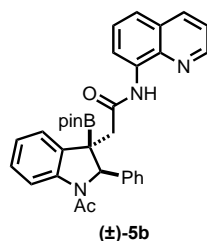

**2-(1-acetyl-2-phenyl-3-(4,4,5,5-tetramethyl-1,3,2-dioxaborolan-2-yl)indolin-3-yl)-N-(quinolin-8-yl)acetamide ((±)-5b):** The title compound was prepared from **1u** (34.3 mg, 0.1 mmol), phenyl triflate (48.8 μL, 0.3 mmol), and bis(pinacolato)diboron (76.2 mg, 0.3 mmol) according to the general dearomative carboboration procedure. Purification by preparative TLC (3:1 hexanes:EtOAc) gave the product as a light-yellow solid (36.1 mg, 66% yield). <sup>1</sup>H NMR (500 MHz, CDCl<sub>3</sub>) δ 9.50 (s, 1H), 8.81–8.69 (m, 2H), 8.24 (d, *J* = 8.1 Hz, 1H), 8.13 (dd, *J* = 8.4, 1.7 Hz, 1H), 7.57–7.40 (m, 4H), 7.27–7.15 (m, 6H), 7.02 (t, *J* = 7.5 Hz, 1H), 5.21 (s, 1H), 3.36 (d, *J* = 14.7 Hz, 1H), 2.95 (d, *J* = 14.8 Hz, 1H), 2.09 (s, 3H), 1.07 (s, 6H), 0.89 (s, 6H); <sup>13</sup>C NMR (125 MHz, CDCl<sub>3</sub>) δ 169.4, 169.0, 148.0, 142.8, 139.7, 138.2, 136.2, 135.7, 134.3, 128.6, 128.3, 127.8,

127.3, 127.3, 124.2, 121.6, 121.4, 116.6, 116.3, 83.8, 49.4, 25.0, 24.8, 24.3; **HRMS** (ESI-TOF) Calcd for C<sub>33</sub>H<sub>35</sub>BN<sub>3</sub>O<sub>4</sub> [M+H] 547.2753, found 547.2753.

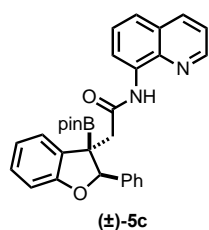

**2-(2-phenyl-3-(4,4,5,5-tetramethyl-1,3,2-dioxaborolan-2-yl)-2,3-dihydrobenzofuran-3-yl)-N-(quinolin-8-yl)acetamide ((±)-5c):** The title compound was prepared from **1v** (15.1 mg, 0.05 mmol), phenyl triflate (24.4  $\mu$ L, 0.15 mmol), and bis(pinacolato)diboron (38.1 mg, 0.15 mmol) according to the general dearomative carboboration procedure. Purification by preparative TLC (5:1 hexanes:EtOAc) gave the product as a white solid (21.8 mg, 86% yield). **<sup>1</sup>H NMR** (600 MHz, CDCl<sub>3</sub>)  $\delta$  9.58 (s, 1H), 8.82–8.64 (m, 2H), 8.12 (dd,  $J$  = 8.2, 1.7 Hz, 1H), 7.61–7.36 (m, 4H), 7.31–7.28 (m, 2H), 7.25–7.21 (m, 3H), 7.11 (td,  $J$  = 7.7, 1.4 Hz, 1H), 6.97–6.74 (m, 2H), 5.56 (s, 1H), 3.43 (d,  $J$  = 15.1 Hz, 1H), 3.03 (d,  $J$  = 15.1 Hz, 1H), 0.98 (s, 6H), 0.90 (s, 6H); **<sup>13</sup>C NMR** (150 MHz, CDCl<sub>3</sub>)  $\delta$  169.2, 159.7, 148.0, 140.1, 138.2, 136.2, 134.5, 132.6, 128.3, 128.1, 128.1, 127.9, 127.4, 127.3, 126.9, 121.5, 121.2, 120.9, 116.3, 108.8, 92.2, 83.7, 49.1, 24.8, 24.8; **HRMS** (ESI-TOF) Calcd for C<sub>31</sub>H<sub>32</sub>BN<sub>2</sub>O<sub>4</sub> [M+H] 506.2491, found 506.2484.

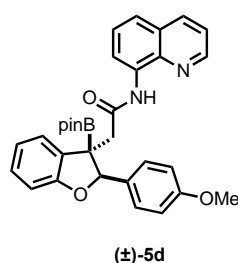

**2-(2-(4-methoxyphenyl)-3-(4,4,5,5-tetramethyl-1,3,2-dioxaborolan-2-yl)-2,3-dihydrobenzofuran-3-yl)-N-(quinolin-8-yl)acetamide ((±)-5d):** The title compound was prepared from **1v** (30.2 mg, 0.1 mmol), 4-methoxyphenyl trifluoromethanesulfonate (36  $\mu$ L, 0.2 mmol), and bis(pinacolato)diboron (76.2 mg, 0.3 mmol) with Pd<sub>2</sub>(dba)<sub>3</sub> (4.2 mg, 4.5 mol%), Cy-JohnPhos (3.3 mg, 9 mol%), *i*-Pr<sub>2</sub>Net (52.2  $\mu$ L, 0.15 mmol), and *t*-AmylOH (0.3 mL) according to the general dearomative carboboration procedure. Purification by preparative TLC (5:1 hexanes:EtOAc) gave the product as a white solid (39.1 mg, 73% yield). **<sup>1</sup>H NMR** (500 MHz, CDCl<sub>3</sub>)  $\delta$  9.56 (s, 1H), 8.82–8.65 (m, 2H), 8.12 (dd,  $J$  = 8.3, 1.7 Hz, 1H), 7.57–7.38 (m, 4H), 7.24–7.18 (m, 2H), 7.10 (td,  $J$  = 7.7, 1.5 Hz, 1H), 6.89–6.62 (m, 4H), 5.51 (s, 1H), 3.75 (s, 3H), 3.41 (d,  $J$  = 15.1 Hz, 1H), 3.00 (d,  $J$  = 15.2 Hz, 1H), 1.00 (s, 6H), 0.95 (s, 6H); **<sup>13</sup>C NMR** (125 MHz, CDCl<sub>3</sub>)  $\delta$  169.3, 159.8, 159.6, 148.0, 138.2, 136.2, 134.5, 132.7, 132.6, 128.2, 128.0, 127.9, 127.4, 127.3, 121.5, 121.2, 120.8, 116.3, 113.5, 108.9, 92.0, 83.7, 55.4, 49.0, 24.9, 24.8; **HRMS** (ESI-TOF) Calcd for C<sub>32</sub>H<sub>34</sub>BN<sub>2</sub>O<sub>5</sub> [M+H] 536.2597, found 536.2599.

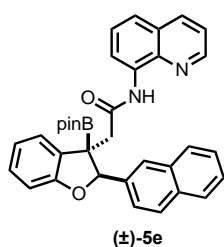

**2-(2-(naphthalen-2-yl)-3-(4,4,5,5-tetramethyl-1,3,2-dioxaborolan-2-yl)-2,3-dihydrobenzofuran-3-yl)-N-(quinolin-8-yl)acetamide ((±)-5e):** The title compound was prepared from **1v** (30.2 mg, 0.1 mmol), naphthalen-2-yl trifluoromethanesulfonate (82.8 mg, 0.3 mmol), and bis(pinacolato)diboron (76.2 mg, 0.3 mmol) according to the general dearomative carboboration procedure. Purification by preparative TLC (5:1 hexanes:EtOAc) gave the product as a white solid (48.3 mg, 87% yield). **<sup>1</sup>H NMR** (600 MHz, CDCl<sub>3</sub>)  $\delta$  9.63 (s, 1H), 8.89–8.66 (m, 2H), 8.12 (dd,  $J$  = 8.3, 1.7 Hz, 1H), 7.87–7.65 (m, 4H), 7.59–7.34 (m, 7H), 7.17 (td,  $J$  = 7.7, 1.4 Hz, 1H), 7.01–6.81 (m, 2H), 5.78 (s, 1H), 3.49 (d,  $J$  = 15.1 Hz, 1H), 3.11 (d,  $J$  = 15.1 Hz, 1H), 0.83 (s, 6H), 0.75 (s,

6H);  $^{13}\text{C}$  NMR (150 MHz,  $\text{CDCl}_3$ )  $\delta$  169.2, 159.7, 148.0, 138.2, 137.6, 136.2, 134.5, 133.4, 133.0, 132.6, 128.1, 128.1, 127.9, 127.5, 127.3, 127.3, 125.9, 125.9, 125.8, 124.7, 121.5, 121.3, 121.0, 116.3, 108.9, 92.3, 83.6, 49.1, 24.7, 24.6; HRMS (ESI-TOF) Calcd for  $\text{C}_{35}\text{H}_{34}\text{BN}_2\text{O}_4$  [M+H] 556.2648, found 556.2656.

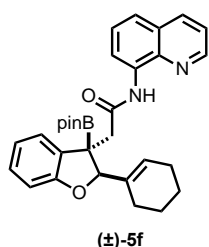

**2-(2-(cyclohex-1-en-1-yl)-3-(4,4,5,5-tetramethyl-1,3,2-dioxaborolan-2-yl)-2,3-dihydrobenzofuran-3-yl)-N-(quinolin-8-yl)acetamide ((±)-5f):**

The title compound was prepared from **1v** (15.1 mg, 0.05 mmol), cyclohex-1-en-1-yl trifluoromethanesulfonate (26.3  $\mu\text{L}$ , 0.15 mmol), and bis(pinacolato)diboron (38.1 mg, 0.15 mmol) according to the general dearomative carboboration procedure. Purification by preparative TLC (5:1 hexanes:EtOAc) gave the product as a colorless oil (18.4 mg, 72% yield).  $^1\text{H}$  NMR (500 MHz,  $\text{CDCl}_3$ )  $\delta$  9.55 (s, 1H), 8.90–8.58 (m, 2H), 8.13 (dd,  $J = 8.3, 1.7$  Hz, 1H), 7.64–7.36 (m, 4H), 7.07 (td,  $J = 7.7, 1.4$  Hz, 1H), 6.86–6.67 (m, 2H), 5.79 (dq,  $J = 3.7, 1.8$  Hz, 1H), 4.98 (s, 1H), 3.28 (d,  $J = 15.4$  Hz, 1H), 2.93 (d,  $J = 15.4$  Hz, 1H), 2.18–1.76 (m, 5H), 1.64–1.49 (m, 4H), 1.36 (s, 6H), 1.33 (s, 6H);  $^{13}\text{C}$  NMR (125 MHz,  $\text{CDCl}_3$ )  $\delta$  169.5, 159.5, 148.0, 138.2, 137.5, 136.2, 134.5, 133.5, 127.8, 127.3, 126.2, 125.5, 121.5, 121.1, 120.3, 116.3, 108.5, 95.6, 83.8, 48.9, 25.6, 25.0, 24.9, 23.5, 22.2, 22.0; HRMS (ESI-TOF) Calcd for  $\text{C}_{31}\text{H}_{36}\text{BN}_2\text{O}_4$  [M+H] 510.2804, found 510.2795.



## General Procedure for Aryl- and Alkenylsilylation of Alkenes

**General Procedure:** To a 4-mL scintillation vial equipped with a Teflon-coated magnetic stir bar were added the alkene substrate (0.1 mmol), dimethylphenylsilylpinacolatoboron (55.2 mg, 0.2 mmol), Pd<sub>2</sub>(dba)<sub>3</sub> (4.6 mg, 5 mol%), Cy-JohnPhos (3.5 mg, 10 mol%), and 4 Å molecular sieves (~30 mg). The vial was sealed with a screw-top septum cap and was then evacuated and backfilled with N<sub>2</sub> (×3). Under positive N<sub>2</sub> pressure, aryl or alkenyl triflate (0.15 mmol), *i*-Pr<sub>2</sub>Net (34.8 μL, 0.2 mmol) and DMF (0.4 mL) were added. All needle inlets/outlets were removed, and the reaction was placed in a heating block that was preheated to 100 °C. After 40–44 h, the black reaction mixture was allowed to cool to room temperature and filtered through a short plug of celite (CH<sub>2</sub>Cl<sub>2</sub> or EtOAc as eluent). The solvent was removed in *vacuo* to afford a dark brown residue, which upon purification by preparative TLC with 5:1 hexanes:EtOAc as the eluent, afforded the pure product.

*Note:* Dimethylphenylsilylpinacolatoboron was used from a fresh bottle. It is suggested that this chemical be stored in a glovebox to prevent decomposition.

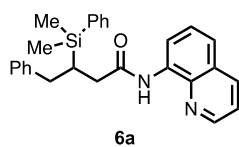

### 3-(dimethyl(phenyl)silyl)-4-phenyl-N-(quinolin-8-yl)butanamide (6a):

The title compound was prepared from **1a** (21.2 mg, 0.1 mmol), phenyl triflate (24.4 μL, 0.15 mmol), and dimethylphenylsilylpinacolatoboron (55.2 mg, 0.2 mmol) according to the general carbosilylation procedure.

Purification by preparative TLC (10:1 to 5:1 hexanes:EtOAc) gave the product as a yellow oil (33.5 mg, 79% yield). <sup>1</sup>H NMR (500 MHz, CDCl<sub>3</sub>) δ 9.61 (s, 1H), 8.80 (dd, *J* = 4.2, 1.7 Hz, 1H), 8.65 (dd, *J* = 7.1, 1.9 Hz, 1H), 8.15 (dd, *J* = 8.2, 1.7 Hz, 1H), 7.58 (tt, *J* = 5.3, 2.6 Hz, 2H), 7.53–7.39 (m, 3H), 7.33 (dd, *J* = 4.8, 1.9 Hz, 3H), 7.24–7.13 (m, 4H), 7.08–7.01 (m, 1H), 2.88 (dd, *J* = 14.1, 5.7 Hz, 1H), 2.65 (dd, *J* = 14.1, 9.8 Hz, 1H), 2.60–2.38 (m, 2H), 2.04 (ddt, *J* = 9.8, 7.4, 6.0 Hz, 1H), 0.34 (s, 3H), 0.30 (s, 3H); <sup>13</sup>C NMR (150 MHz, CDCl<sub>3</sub>) δ 171.5, 147.9, 141.3, 138.3, 137.7, 136.3, 134.4, 134.0, 129.0, 129.0, 128.2, 127.8, 127.8, 127.4, 125.8, 121.5, 121.2, 116.3, 38.1, 36.1, 24.6, –4.0, –4.2; HRMS (ESI-TOF) Calcd for C<sub>27</sub>H<sub>29</sub>N<sub>2</sub>Osi [M+H] 425.2049, found 425.2049.

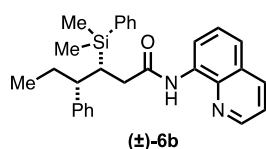

### 3-(dimethyl(phenyl)silyl)-4-phenyl-N-(quinolin-8-yl)hexanamide

((±)-**6b**): The title compound was prepared from **1c** (24.0 mg, 0.1 mmol), phenyl triflate (24.4 μL, 0.15 mmol), and dimethylphenylsilylpinacolatoboron (55.2 mg, 0.2 mmol) according to

the general carbosilylation procedure. Purification by preparative TLC (50:1 benzene:acetone) gave the product as a yellow oil (32.1 mg, 71% yield). <sup>1</sup>H NMR (500 MHz, CDCl<sub>3</sub>) δ 9.66 (s, 1H), 8.81 (dd, *J* = 4.2, 1.7 Hz, 1H), 8.70 (dd, *J* = 7.4, 1.6 Hz, 1H), 8.16 (dd, *J* = 8.3, 1.7 Hz, 1H), 7.75–7.35 (m, 5H), 7.31–7.18 (m, 7H), 7.16–7.11 (m, 1H), 2.89–2.51 (m, 3H), 2.14 (td, *J* = 7.4, 5.2 Hz, 1H), 1.78 (dtt, *J* = 14.6, 7.3, 3.8 Hz, 1H), 1.72–1.62 (m, 1H), 0.64 (t, *J* = 7.3 Hz, 3H), 0.18 (s, 3H), 0.11 (s, 3H); <sup>13</sup>C NMR (125 MHz, CDCl<sub>3</sub>) δ 171.8, 148.0, 144.4, 138.8, 138.3, 136.3, 134.6, 133.9, 128.7, 128.7, 128.1, 127.9, 127.7, 127.4, 126.1, 121.5, 121.1, 116.3, 48.6, 36.7, 29.5, 26.5, 12.5, –2.2, –3.7; HRMS (ESI-TOF) Calcd for C<sub>29</sub>H<sub>33</sub>N<sub>2</sub>Osi [M+H] 453.2362, found 453.2359.

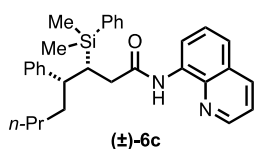

**3-(dimethyl(phenyl)silyl)-4-phenyl-N-(quinolin-8-yl)octanamide ((±)-6c):** The title compound was prepared from **1z** (26.8 mg, 0.1 mmol), phenyl triflate (24.4  $\mu$ L, 0.15 mmol), and dimethylphenylsilylpinacolboron (55.2 mg, 0.2 mmol) according to the general carbosilylation procedure. Purification by preparative TLC (10:1 hexanes:EtOAc) gave the product as a colorless oil (34.1 mg, 71% yield).  $^1\text{H NMR}$  (600 MHz,  $\text{CDCl}_3$ )  $\delta$  9.31 (s, 1H), 8.75 (dd,  $J = 4.2, 1.7$  Hz, 1H), 8.65 (dd,  $J = 7.6, 1.4$  Hz, 1H), 8.12 (dd,  $J = 8.2, 1.6$  Hz, 1H), 7.66–7.56 (m, 2H), 7.49 (t,  $J = 7.9$  Hz, 1H), 7.46–7.40 (m, 2H), 7.29–7.22 (m, 3H), 7.18–7.13 (m, 4H), 7.01 (td,  $J = 6.3, 3.2$  Hz, 1H), 2.82 (ddd,  $J = 10.8, 9.1, 3.7$  Hz, 1H), 2.47 (dd,  $J = 15.8, 5.5$  Hz, 1H), 2.39 (dd,  $J = 15.9, 6.6$  Hz, 1H), 2.08 (dt,  $J = 9.2, 6.0$  Hz, 1H), 1.75 (dddd,  $J = 13.5, 10.0, 6.6, 3.8$  Hz, 1H), 1.57–1.47 (m, 1H), 1.18–1.01 (m, 2H), 0.95 (tdd,  $J = 11.2, 9.4, 6.3$  Hz, 2H), 0.70 (t,  $J = 7.3$  Hz, 3H), 0.40 (s, 3H), 0.34 (s, 3H);  $^{13}\text{C NMR}$  (150 MHz,  $\text{CDCl}_3$ )  $\delta$  171.8, 147.8, 144.7, 139.5, 138.2, 136.2, 134.6, 133.9, 128.6, 128.6, 128.1, 127.8, 127.7, 127.4, 126.0, 121.4, 121.0, 116.1, 47.0, 37.5, 36.0, 30.1, 28.6, 22.5, 13.9, –2.4, –3.0; **HRMS** (ESI-TOF) Calcd for  $\text{C}_{31}\text{H}_{37}\text{N}_2\text{O}_2\text{Si}$  [ $\text{M}+\text{H}$ ] 481.2675, found 481.2667.

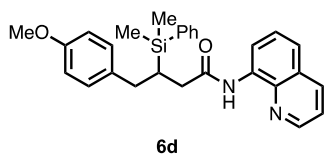

**3-(dimethyl(phenyl)silyl)-4-(4-methoxyphenyl)-N-(quinolin-8-yl)butanamide (6d):** The title compound was prepared from **1a** (21.2 mg, 0.1 mmol), 4-methoxyphenyl trifluoromethanesulfonate (36  $\mu$ L, 0.2 mmol), and dimethylphenylsilylpinacolboron (55.2 mg, 0.2 mmol) according to the general carbosilylation procedure. Purification by preparative TLC (30:1 toluene:EtOAc) gave the product as a colorless oil (36.8 mg, 81% yield).  $^1\text{H NMR}$  (500 MHz,  $\text{CDCl}_3$ )  $\delta$  9.56 (s, 1H), 8.80 (dd,  $J = 4.2, 1.7$  Hz, 1H), 8.64 (dd,  $J = 7.1, 1.9$  Hz, 1H), 8.14 (dd,  $J = 8.2, 1.7$  Hz, 1H), 7.67–7.37 (m, 5H), 7.37–7.28 (m, 3H), 7.15–7.01 (m, 2H), 6.73–6.61 (m, 2H), 3.61 (s, 3H), 2.84 (dd,  $J = 14.1, 5.7$  Hz, 1H), 2.65–2.38 (m, 3H), 2.00 (ddt,  $J = 9.9, 7.7, 5.8$  Hz, 1H), 0.34 (s, 3H), 0.31 (s, 3H);  $^{13}\text{C NMR}$  (125 MHz,  $\text{CDCl}_3$ )  $\delta$  171.6, 157.7, 147.9, 138.2, 137.8, 136.2, 134.5, 134.0, 133.3, 129.9, 129.0, 127.8, 127.8, 127.4, 121.5, 121.1, 116.3, 113.6, 55.0, 38.2, 35.3, 24.8, –4.0, –4.2; **HRMS** (ESI-TOF) Calcd for  $\text{C}_{28}\text{H}_{31}\text{N}_2\text{O}_2\text{Si}$  [ $\text{M}+\text{H}$ ] 455.2155, found 455.2157.

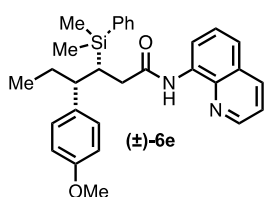

**3-(dimethyl(phenyl)silyl)-4-(4-methoxyphenyl)-N-(quinolin-8-yl)hexanamide ((±)-6e):** The title compound was prepared from **1c** (24.0 mg, 0.1 mmol), 4-methoxyphenyl trifluoromethanesulfonate (27  $\mu$ L, 0.15 mmol), and dimethylphenylsilylpinacolboron (55.2 mg, 0.2 mmol) according to the general carbosilylation procedure. Purification by preparative TLC (40:1 benzene:acetone) gave the product as a colorless oil (34.7 mg, 72% yield).  $^1\text{H NMR}$  (600 MHz,  $\text{CDCl}_3$ )  $\delta$  9.68 (s, 1H), 8.83 (dd,  $J = 4.2, 1.7$  Hz, 1H), 8.73 (dd,  $J = 7.5, 1.5$  Hz, 1H), 8.18 (dd,  $J = 8.2, 1.7$  Hz, 1H), 7.60–7.45 (m, 5H), 7.36–7.28 (m, 3H), 7.20–7.09 (m, 2H), 6.86–6.73 (m, 2H), 3.76 (s, 3H), 2.77–2.65 (m, 2H), 2.60 (dd,  $J = 15.8, 7.7$  Hz, 1H), 2.13 (td,  $J = 7.4, 5.0$  Hz, 1H), 1.79 (dq,  $J = 14.6, 7.3, 3.7$  Hz, 1H), 1.67–1.59 (m, 1H), 0.66 (t,  $J = 7.2$  Hz, 3H), 0.22 (s, 3H), 0.17 (s, 3H);  $^{13}\text{C NMR}$  (150 MHz,  $\text{CDCl}_3$ )  $\delta$  171.5, 157.4, 147.5, 138.5, 137.9, 135.9, 135.9, 134.2, 133.4, 129.1, 128.2, 127.5, 127.2, 127.0, 121.1, 120.7, 115.9, 113.0, 54.7, 47.3, 36.3, 29.3,

26.1, 12.1, -2.7, -3.9; **HRMS** (ESI-TOF) Calcd for C<sub>30</sub>H<sub>35</sub>N<sub>2</sub>O<sub>2</sub>Si [M+H] 483.2468, found 483.2466.

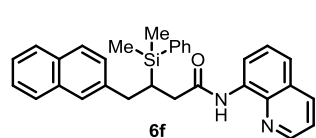

**3-(dimethyl(phenyl)silyl)-4-(naphthalen-2-yl)-N-(quinolin-8-yl)butanamide (6f):** The title compound was prepared from **1a** (21.2 mg, 0.1 mmol), pyridine ne-2-yl trifluoromethanesulfonate (41.4 mg, 0.15 mmol), and dimethylphenylsilylpinacolboron

(55.2 mg, 0.2 mmol) according to the general carbosilylation procedure. Purification by preparative TLC (10:1 hexanes:EtOAc) gave the product as a colorless solid (41.2 mg, 87% yield). **<sup>1</sup>H NMR** (600 MHz, CDCl<sub>3</sub>) δ 9.54 (s, 1H), 8.73 (dd, *J* = 4.2, 1.7 Hz, 1H), 8.57 (dd, *J* = 6.2, 2.8 Hz, 1H), 8.10 (dd, *J* = 8.2, 1.7 Hz, 1H), 7.72–7.54 (m, 6H), 7.46–7.40 (m, 3H), 7.35 (ddt, *J* = 9.6, 4.9, 2.3 Hz, 4H), 7.32–7.26 (m, 2H), 3.06 (dd, *J* = 14.0, 5.5 Hz, 1H), 2.80 (dd, *J* = 14.1, 10.1 Hz, 1H), 2.57 (dd, *J* = 15.1, 5.8 Hz, 1H), 2.47 (dd, *J* = 15.1, 7.6 Hz, 1H), 2.16 (ddt, *J* = 10.0, 7.7, 5.7 Hz, 1H), 0.38 (s, 3H), 0.35 (s, 3H); **<sup>13</sup>C NMR** (150 MHz, CDCl<sub>3</sub>) δ 171.5, 147.9, 138.8, 138.1, 137.7, 136.2, 134.3, 134.0, 133.3, 132.0, 129.0, 127.9, 127.8, 127.8, 127.5, 127.3, 127.3, 127.3, 127.2, 125.5, 124.9, 121.4, 121.1, 116.2, 38.2, 36.4, 24.5, -4.0, -4.1; **HRMS** (ESI-TOF) Calcd for C<sub>31</sub>H<sub>31</sub>N<sub>2</sub>O<sub>2</sub>Si [M+H] 475.2206, found 475.2203.

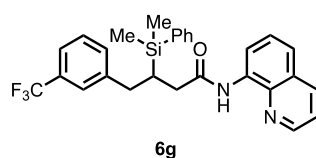

**3-(dimethyl(phenyl)silyl)-N-(quinolin-8-yl)-4-(3-(trifluoromethyl)phenyl)butanamide (6g):** The title compound was prepared from **1a** (21.2 mg, 0.1 mmol), 3-(trifluoromethyl)phenyl trifluoromethanesulfonate (30 μL, 0.15 mmol), and dimethylphenylsilylpinacolboron (55.2 mg, 0.2

mmol) according to the general carbosilylation procedure. Purification by preparative TLC (10:1 hexanes:EtOAc) gave the product as a yellow oil (33.5 mg, 68% yield). **<sup>1</sup>H NMR** (500 MHz, CDCl<sub>3</sub>) δ 9.61 (s, 1H), 8.78 (dd, *J* = 4.3, 1.7 Hz, 1H), 8.62 (dd, *J* = 6.4, 2.5 Hz, 1H), 8.14 (dd, *J* = 8.2, 1.7 Hz, 1H), 7.61–7.51 (m, 2H), 7.49–7.42 (m, 3H), 7.41–7.30 (m, 5H), 7.28–7.20 (m, 2H), 2.90 (dd, *J* = 14.2, 6.0 Hz, 1H), 2.72 (dd, *J* = 14.2, 9.5 Hz, 1H), 2.58 (dd, *J* = 15.2, 5.5 Hz, 1H), 2.41 (dd, *J* = 15.2, 8.2 Hz, 1H), 2.06 (ddt, *J* = 9.5, 8.1, 5.7 Hz, 1H), 0.33 (s, 3H), 0.32 (s, 3H); **<sup>13</sup>C NMR** (125 MHz, CDCl<sub>3</sub>) δ 171.1, 148.0, 142.3, 138.2, 137.2, 136.3, 134.3, 134.0, 132.4, 130.3 (q, *J* = 32.0 Hz), 129.2, 128.5, 127.9, 127.8, 127.3, 125.7 (q, *J* = 4.6, 3.8 Hz), 124.1 (q, *J* = 273.4 Hz), 122.7 (q, *J* = 3.6 Hz), 121.5, 121.3, 116.3, 38.2, 36.1, 24.5, -4.1, -4.2; **<sup>19</sup>F NMR** (376 MHz, CDCl<sub>3</sub>) δ -62.8; **HRMS** (ESI-TOF) Calcd for C<sub>28</sub>H<sub>28</sub>F<sub>3</sub>N<sub>2</sub>O<sub>2</sub>Si [M+H] 493.1923, found 493.1928.

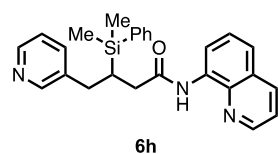

**3-(dimethyl(phenyl)silyl)-4-(pyridine-3-yl)-N-(quinolin-8-yl)butanamide (6h):** The title compound was prepared from **1a** (21.2 mg, 0.1 mmol), pyridine-3-yl trifluoromethanesulfonate (24.1 μL, 0.15 mmol), and dimethylphenylsilylpinacolboron (55.2 mg, 0.2

mmol) according to the general carbosilylation procedure. Purification by preparative TLC (1:1 hexanes:EtOAc) gave the product as a yellow oil (20.0 mg, 47% yield). **<sup>1</sup>H NMR** (500 MHz, CDCl<sub>3</sub>) δ 9.64 (s, 1H), 8.80 (dt, *J* = 4.0, 1.7 Hz, 1H), 8.63 (dt, *J* = 6.5, 2.1 Hz, 1H), 8.41 (d, *J* = 2.3 Hz, 1H), 8.30 (dd, *J* = 4.1, 2.3 Hz, 1H), 8.15 (dt, *J* = 8.3, 1.8 Hz, 1H), 7.69–

7.40 (m, 6H), 7.34 (dp,  $J = 5.6, 2.0$  Hz, 3H), 7.06 (dd,  $J = 8.0, 4.8$  Hz, 1H), 2.99–2.37 (m, 4H), 2.11–1.94 (m, 1H), 1.68 (s, 1H), 0.34 (s, 3H), 0.32 (s, 3H);  $^{13}\text{C}$  NMR (125 MHz,  $\text{CDCl}_3$ )  $\delta$  171.0, 150.3, 148.1, 147.4, 138.2, 137.2, 136.7, 136.4, 136.3, 134.3, 133.9, 129.2, 127.9, 127.9, 127.3, 123.1, 121.6, 121.4, 116.4, 38.0, 33.4, 24.3, –4.1, –4.1; HRMS (ESI-TOF) Calcd for  $\text{C}_{26}\text{H}_{28}\text{N}_3\text{Osi}$  [M+H] 426.2002, found 426.1995.

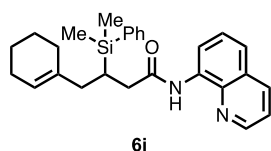

**4-(cyclohex-1-en-1-yl)-3-(dimethyl(phenyl)silyl)-N-(quinolin-8-yl)butanamide (6i):** The title compound was prepared from **1a** (21.2 mg, 0.1 mmol), cyclohex-1-en-1-yl trifluoromethanesulfonate (52.6  $\mu\text{L}$ , 0.3 mmol), and dimethylphenylsilylpinacolatoboron (55.2 mg, 0.2 mmol) according to the general carbosilylation procedure. Purification by preparative TLC (10:1 hexanes:EtOAc) gave the product as a yellow oil (36.4 mg, 85% yield).  $^1\text{H}$  NMR (500 MHz,  $\text{CDCl}_3$ )  $\delta$  9.68 (s, 1H), 8.89–8.44 (m, 2H), 8.15 (dd,  $J = 8.3, 1.7$  Hz, 1H), 7.66–7.39 (m, 5H), 7.36–7.29 (m, 3H), 5.46–5.37 (m, 1H), 2.60–2.34 (m, 2H), 2.24–2.01 (m, 2H), 2.00–1.86 (m, 2H), 1.84–1.63 (m, 3H), 1.56–1.40 (m, 2H), 1.39–1.23 (m, 2H), 0.36 (s, 3H), 0.36 (s, 3H);  $^{13}\text{C}$  NMR (150 MHz,  $\text{CDCl}_3$ )  $\delta$  172.0, 147.9, 138.3, 137.9, 136.5, 136.3, 134.7, 134.0, 128.9, 127.9, 127.7, 127.4, 123.4, 121.5, 121.0, 116.2, 39.4, 38.6, 27.4, 25.2, 22.8, 22.2, 19.5, –4.2, –4.3; HRMS (ESI-TOF) Calcd for  $\text{C}_{27}\text{H}_{33}\text{N}_2\text{Osi}$  [M+H] 429.2362, found 429.2363.

## Diastereoselective Arylboration using a Removable Chiral Directing Group

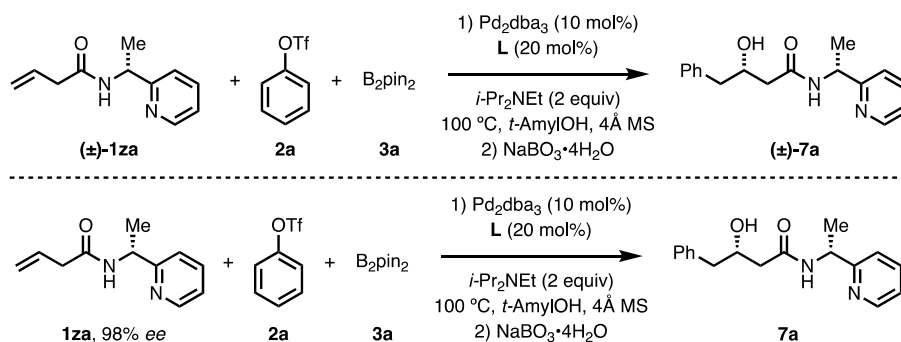

**Scheme S6:** Arylboration/oxidation of terminal alkene using a chiral auxiliary.

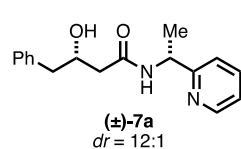

### **3-hydroxy-4-phenyl-*N*-(1-(pyridin-2-yl)ethyl)butanamide ((±)-7a):**

The title compound was prepared from (±)-**1za** (9.5 mg, 0.05 mmol), phenyl triflate (12.2 μL, 0.075 mmol), and bis(pinacolato)diboron (25.4 mg, 0.1 mmol) with Pd<sub>2</sub>(dba)<sub>3</sub> (4.6 mg, 10 mol%), Cy-JohnPhos (3.5 mg, 20 mol%), and *i*-Pr<sub>2</sub>Net (17.4 μL, 0.1 mmol) according to the general carboboration/oxidation procedure. Purification by preparative TLC (1:1 to 1:2 hexanes:EtOAc) gave the product as a white solid (7.8 mg, 55% yield). This product was isolated as an inseparable 12:1 mixture of diastereomers. The following analytical data correspond to the mixture. <sup>1</sup>H NMR (400 MHz, CDCl<sub>3</sub>) δ 8.77–8.40 (m, 1H), 7.68 (td, *J* = 7.7, 1.8 Hz, 1H), 7.39–7.15 (m, 7H), 7.10–6.76 (m, 1H), 5.17 (p, *J* = 6.9 Hz, 1H), 4.40–3.99 (m, 1H), 3.03–2.67 (m, 2H), 2.55–2.14 (m, 2H), 1.59–1.37 (m, 3H); <sup>13</sup>C NMR (150 MHz, CDCl<sub>3</sub>) δ 171.8, 171.4, 160.8, 160.6, 148.9, 148.8, 138.0, 138.0, 137.0, 137.0, 129.5, 129.4, 128.5, 128.5, 126.5, 126.5, 122.4, 122.4, 121.6, 121.5, 69.7, 49.8, 49.7, 43.3, 43.1, 42.4, 41.4, 22.6, 22.5; HRMS (ESI-TOF) Calcd for C<sub>17</sub>H<sub>21</sub>N<sub>2</sub>O<sub>2</sub> [M+H] 285.1603, found 285.1607; X-ray (single-crystal) Colorless needle crystals of X-ray diffraction quality were obtained by vapor diffusion of pentane into a saturated solution of (±)-**7a** in CH<sub>2</sub>Cl<sub>2</sub> (CCDC 1939488).<sup>[15]</sup>

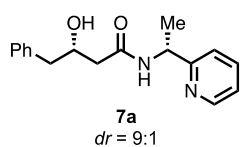

### **(*S*)-3-hydroxy-4-phenyl-*N*-(1-(pyridin-2-yl)ethyl)butanamide**

**(7a):** The title compound was prepared from **1za** (9.5 mg, 0.05 mmol), phenyl triflate (12.2 μL, 0.075 mmol), and bis(pinacolato)diboron (25.4 mg, 0.1 mmol) with Pd<sub>2</sub>(dba)<sub>3</sub> (4.6 mg, 10 mol%), Cy-JohnPhos (3.5 mg, 20 mol%), and *i*-Pr<sub>2</sub>Net (17.4 μL, 0.1 mmol) according to the general carboboration/oxidation procedure. Purification by preparative TLC (1:1 to 1:2 hexanes:EtOAc) gave the product as a white solid (9.7 mg, 68% yield, >99% *ee*). This product was isolated as an inseparable 9:1 mixture of diastereomers. The analytical data is identical to the racemic compound. SFC (chiral column) The enantiomeric excess was determined by chiral SFC on a Daicel IH column (3 μm, 4.6×250 mm), 7% MeOH/CO<sub>2</sub>, 4.0 mL/min, λ = 214 nm, *t* (major) = 5.131 min, *t* (minor) = 6.481 min.

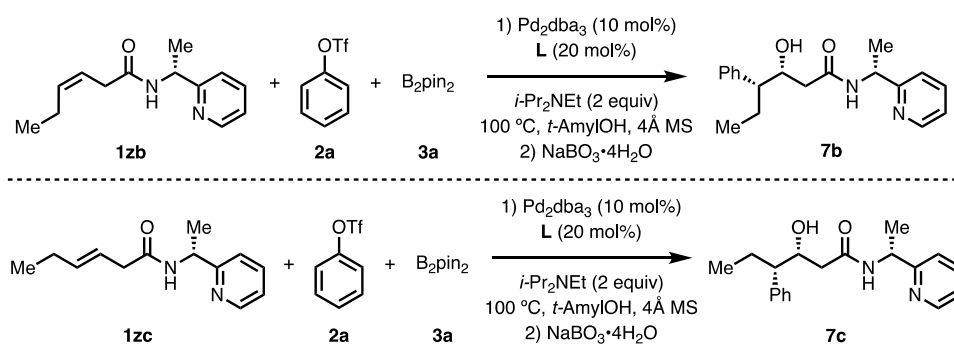

**Scheme S7:** Diastereoselective aryloboration/oxidation of internal alkenes.

**(3*R*,4*R*)-3-hydroxy-4-phenyl-*N*-(1-(pyridin-2-yl)ethyl)hexanamide (7b):** The title compound was prepared from **1zb** (10.9 mg, 0.05 mmol), phenyl triflate (12.2  $\mu$ L, 0.075 mmol), and bis(pinacolato)diboron (25.4 mg, 0.1 mmol) with Pd<sub>2</sub>(dba)<sub>3</sub> (4.6 mg, 10 mol%), Cy-JohnPhos (3.5 mg, 20 mol%), and *i*-Pr<sub>2</sub>Net (17.4  $\mu$ L, 0.1 mmol) according to the general carboboration/oxidation procedure. Purification by preparative TLC (1:1 hexanes:EtOAc) gave the product as a white solid (8.0 mg, 51% yield). This product was isolated as an inseparable 8:1 mixture of diastereomers. <sup>1</sup>H NMR (600 MHz, CDCl<sub>3</sub>)  $\delta$  8.48 (d, *J* = 4.9 Hz, 1H), 7.64 (t, *J* = 7.7 Hz, 1H), 7.30 (t, *J* = 7.5 Hz, 2H), 7.24–7.10 (m, 5H), 6.77 (d, *J* = 7.5 Hz, 1H), 5.10 (p, *J* = 7.1 Hz, 1H), 4.51 (s, 1H), 4.07 (td, *J* = 8.8, 2.8 Hz, 1H), 2.67–2.42 (m, 1H), 2.28–2.05 (m, 3H), 1.44 (d, *J* = 6.9 Hz, 3H), 0.72 (t, *J* = 7.4 Hz, 3H); <sup>13</sup>C NMR (150 MHz, CDCl<sub>3</sub>)  $\delta$  172.0, 160.5, 148.9, 142.1, 136.9, 128.5, 128.5, 126.5, 122.4, 121.5, 72.5, 54.1, 49.6, 40.1, 24.9, 22.6, 12.0; HRMS (ESI-TOF) Calcd for C<sub>19</sub>H<sub>25</sub>N<sub>2</sub>O<sub>2</sub> [M+H] 313.1916, found 313.1916.

**(3*R*,4*S*)-3-hydroxy-4-phenyl-*N*-(1-(pyridin-2-yl)ethyl)hexanamide (7c):** The title compound was prepared from **1zc** (10.9 mg, 0.05 mmol), phenyl triflate (12.2  $\mu$ L, 0.075 mmol), and bis(pinacolato)diboron (25.4 mg, 0.1 mmol) with Pd<sub>2</sub>(dba)<sub>3</sub> (4.6 mg, 10 mol%), Cy-JohnPhos (3.5 mg, 20 mol%), and *i*-Pr<sub>2</sub>Net (17.4  $\mu$ L, 0.1 mmol) according to the general carboboration/oxidation procedure. Purification by preparative TLC (1:1 hexanes:EtOAc) gave the product as a white solid (5.0 mg, 32% yield). This product was isolated as an inseparable 7:1 mixture of diastereomers. <sup>1</sup>H NMR (600 MHz, CDCl<sub>3</sub>)  $\delta$  8.50 (dd, *J* = 17.0, 4.6 Hz, 1H), 7.78–7.59 (m, 1H), 7.31 (t, *J* = 7.5 Hz, 2H), 7.26–7.16 (m, 5H), 7.13–6.98 (m, 1H), 5.13 (p, *J* = 7.1 Hz, 1H), 4.38–4.15 (m, 1H), 2.50 (dt, *J* = 10.4, 5.3 Hz, 1H), 2.39 (dd, *J* = 15.3, 2.5 Hz, 1H), 2.22 (dd, *J* = 15.3, 9.7 Hz, 1H), 1.94–1.69 (m, 2H), 1.42 (d, *J* = 7.0 Hz, 3H), 0.80 (dt, *J* = 14.9, 7.3 Hz, 3H); <sup>13</sup>C NMR (150 MHz, CDCl<sub>3</sub>)  $\delta$  171.6, 160.8, 149.0, 141.0, 136.9, 129.1, 128.3, 126.6, 122.4, 121.5, 71.4, 53.3, 49.7, 40.8, 24.6, 22.6, 12.2; HRMS (ESI-TOF) Calcd for C<sub>19</sub>H<sub>25</sub>N<sub>2</sub>O<sub>2</sub> [M+H] 313.1916, found 313.1910.

## Alternative Stereoinduction Model for Diastereoselective Arylboration

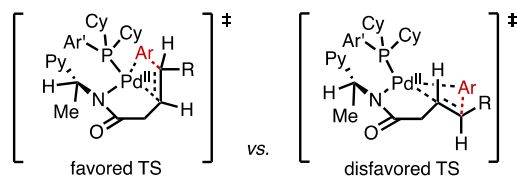

**Scheme S8:** Plausible transition states for migratory insertion with the phosphine ligand coordinated to the palladium center and the chiral directing group bound in a monodentate fashion. This model is related to earlier work by He, Peng, and Chen, who proposed dissociation of the quinoline moiety of the 8-aminoquinoline directing group during enantioselective Pd(0)/PR<sub>3</sub>-catalyzed C(sp<sup>3</sup>)-H arylation.<sup>[16]</sup>

## Large-Scale Synthesis of (±)-4c

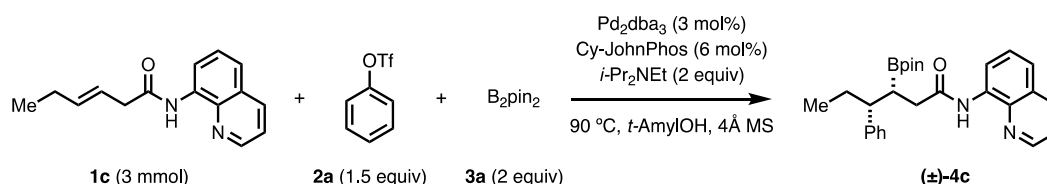

**Scheme S9:** Large-scale synthesis of boronate (±)-4c.

**Procedure for Large-Scale Synthesis of (±)-4c:** Alkene substrate **1c** (720 mg, 3 mmol), *N*-bis(pinacolato)diboron (1.52 g, 6 mmol), Pd<sub>2</sub>(dba)<sub>3</sub> (84 mg, 0.09 mmol), Cy-JohnPhos (66 mg, 0.18 mmol), and 4 Å molecular sieves (800 mg) were added to a 50-mL round-bottom flask. The reaction flask was sealed with a rubber septum and was then evacuated and backfilled with N<sub>2</sub> (×3). Under positive N<sub>2</sub> pressure, phenyl triflate (0.73 mL, 4.5 mmol), *i*-Pr<sub>2</sub>NEt (1.04 mL, 6 mmol) and *t*-AmylOH (6 mL) were added. The flask was submerged into a silicon oil bath that was pre-heated to 90 °C. After 40 h, the dark brown reaction mixture was cooled to room temperature, diluted with EtOAc (10 mL), and filtered through a short plug of celite. The organic solution was concentrated to afford a brown residue that upon purification by rapid silica gel column chromatography (with 30:1 to 15:1 hexanes:EtOAc as the eluent) afforded (±)-4c (1.21 g, 91%) as a white solid. Analytical data was consistent with the information reported above.

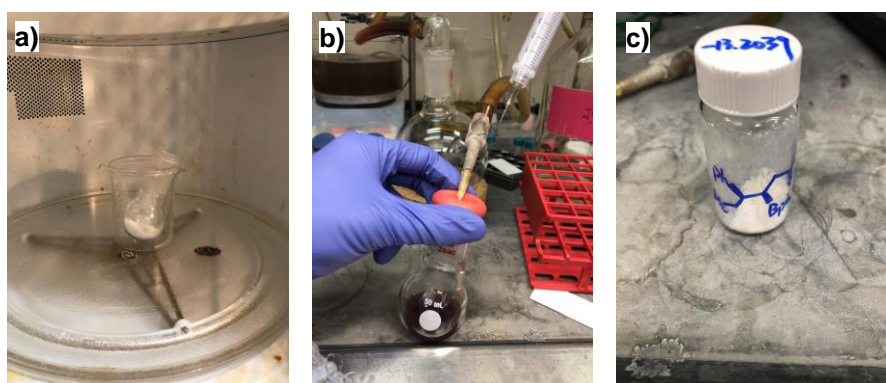

**Figure S2:** Photographic depiction of the procedure for gram-scale synthesis of (±)-4c.

a) Activating 4 Å molecular sieves. b) Adding solvent. c) Isolated pure (±)-4c.



## Procedures for the Transformations of Borylated Products

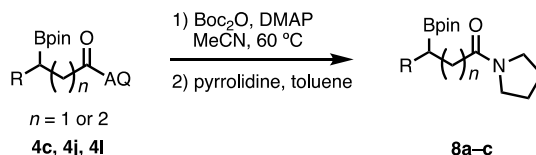

**Scheme S10:** Transamination deprotection of 8-aminoquinoline amides.

**General Procedure for Transamination:**<sup>[17]</sup> To a 25-mL round-bottom flask containing a Teflon-coated magnetic stir bar, were added AQ amide, 4-(dimethylamino)pyridine (10 mol%), and Boc anhydride (2 equiv). The reaction flask was evacuated and backfilled with N<sub>2</sub> (×1), followed by addition of anhydrous MeCN (0.1 M). The reaction mixture was heated at 60 °C for 2 h. After cooling to room temperature, the reaction was concentrated under vacuum and purified by column chromatography (2:1 hexanes:EtOAc) to afford the Boc-protected amide. The Boc amide was then dissolved in toluene (0.5 M), followed by addition of pyrrolidine (1.5 equiv). The reaction mixture was heated under N<sub>2</sub> atmosphere at 60 °C overnight. Upon completion, the organic mixture was concentrated under vacuum and purified by column chromatography (1:2 hexanes:EtOAc) to afford pure product.

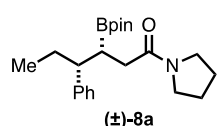

**4-phenyl-1-(pyrrolidin-1-yl)-3-(4,4,5,5-tetramethyl-1,3,2-dioxaborolan-2-yl)hexan-1-one ((±)-8a):** The title compound was prepared from (±)-**4c** (444 mg, 1 mmol) following the general transamination procedure. Compound (±)-**8a** was isolated as a white solid (345 mg, 93% yield). <sup>1</sup>H NMR (400 MHz, CDCl<sub>3</sub>) δ 7.28–7.08 (m, 5H), 3.53–3.22 (m, 4H), 2.58 (ddd, *J* = 10.5, 8.2, 3.9 Hz, 1H), 2.51–2.27 (m, 2H), 1.99–1.71 (m, 6H), 1.66–1.54 (m, 1H), 1.11 (s, 6H), 1.02 (s, 6H), 0.74 (t, *J* = 7.3 Hz, 3H); <sup>13</sup>C NMR (125 MHz, CDCl<sub>3</sub>) δ 172.0, 144.8, 128.7, 127.8, 125.8, 82.4, 48.9, 46.5, 45.7, 35.3, 27.6, 26.0, 24.9, 24.7, 24.4, 12.1; **HRMS** (ESI-TOF) Calcd for C<sub>16</sub>H<sub>23</sub>BNO<sub>2</sub> [M–C<sub>6</sub>H<sub>11</sub>O] 271.1858, found 271.1865 (Note: Based on the observed molecular weight, during ionization, compound **8a** apparently underwent hydrolysis to the boronic acid, followed by dehydration.)

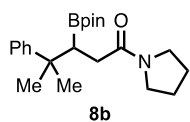

**4-methyl-4-phenyl-1-(pyrrolidin-1-yl)-3-(4,4,5,5-tetramethyl-1,3,2-dioxaborolan-2-yl)pentan-1-one (8b):** The title compound was prepared from **4j** (40.0 mg, 0.09 mmol) following the general transamination procedure. Compound **8b** was isolated as a white solid (26.4 mg, 79% yield). <sup>1</sup>H NMR (500 MHz, CDCl<sub>3</sub>) δ 7.42–7.32 (m, 2H), 7.32–7.23 (m, 2H), 7.20–7.03 (m, 1H), 3.34 (t, *J* = 6.8 Hz, 2H), 3.22 (dt, *J* = 10.2, 6.5 Hz, 1H), 3.00 (dt, *J* = 10.2, 6.7 Hz, 1H), 2.27 (dd, *J* = 17.0, 13.1 Hz, 1H), 1.90–1.63 (m, 6H), 1.40 (s, 3H), 1.37 (s, 3H), 1.29 (s, 6H), 1.23 (s, 6H); <sup>13</sup>C NMR (150 MHz, CDCl<sub>3</sub>) δ 172.1, 150.3, 127.9, 125.8, 125.3, 82.7, 46.2, 45.5, 38.6, 33.6, 31.4, 25.9, 25.1, 24.9, 24.4, 24.3; **HRMS** (ESI-TOF) Calcd for C<sub>22</sub>H<sub>35</sub>BNO<sub>3</sub> [M+H] 371.2746, found 371.2740.

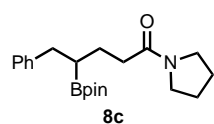

**5-phenyl-1-(pyrrolidin-1-yl)-4-(4,4,5,5-tetramethyl-1,3,2-dioxaborolan-2-yl)pentan-1-one (8c):** The title compound was prepared from **4l** (215 mg, 0.5 mmol) following the general transamination procedure. Compound **8c** was isolated as a yellow oil (150 mg, 84% yield).

$^1\text{H NMR}$  (400 MHz,  $\text{CDCl}_3$ )  $\delta$  7.24–7.05 (m, 5H), 3.51–3.26 (m, 4H), 2.81–2.61 (m, 2H), 2.37–2.17 (m, 2H), 1.83 (dtdd,  $J = 41.1, 14.0, 7.5, 3.4$  Hz, 6H), 1.37 (p,  $J = 7.8$  Hz, 1H), 1.15 (s, 6H), 1.12 (s, 6H);  $^{13}\text{C NMR}$  (125 MHz,  $\text{CDCl}_3$ )  $\delta$  171.6, 141.8, 128.8, 128.0, 125.6, 83.0, 46.5, 45.5, 37.2, 34.4, 26.3, 26.0, 24.7, 24.7, 24.3; **HRMS** (ESI-TOF) Calcd for  $\text{C}_{15}\text{H}_{21}\text{BNO}_2$  [ $\text{M}-\text{C}_6\text{H}_{11}\text{O}$ ] 257.1702, found 257.1705 (Note: Compound **8c** was hydrolyzed to boronic acid, followed by dehydration to the corresponding molecular weight.)

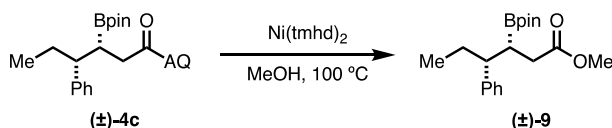

**Scheme S11:** Methanolysis of AQ amide ( $\pm$ )-**4c**.

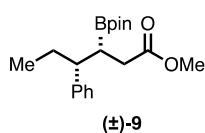

**methyl 4-phenyl-3-(4,4,5,5-tetramethyl-1,3,2-dioxaborolan-2-yl)hexanoate ((±)-9):** The title compound was prepared by adapting a literature procedure.<sup>[18]</sup> To a 15-mL reaction tube containing a Teflon-coated magnetic stir bar, were added compound ( $\pm$ )-**4c** (44.4 mg, 0.1 mmol), and  $\text{Ni}(\text{tmhd})_2$  (64 mg, 0.15 mmol). The reaction vessel was evacuated and backfilled with  $\text{N}_2$  ( $\times 3$ ), followed by addition of anhydrous MeOH (1 mL). The reaction mixture was heated at 100 °C for 6 days. After cooling to room temperature, the reaction was diluted with EtOAc (10 mL) and filtered through a plug of celite with EtOAc as the eluent. The resulting solution was concentrated under vacuum and purified by preparative TLC (5:1 hexanes:EtOAc) to afford the product as a yellow oil (25.9 mg, 78% yield).

$^1\text{H NMR}$  (500 MHz,  $\text{CDCl}_3$ )  $\delta$  7.28–7.24 (m, 2H), 7.22–7.15 (m, 3H), 3.65 (s, 3H), 2.63–2.35 (m, 3H), 1.96–1.71 (m, 2H), 1.70–1.48 (m, 1H), 1.10 (s, 6H), 1.02 (s, 6H), 0.74 (t,  $J = 7.3$  Hz, 3H);  $^{13}\text{C NMR}$  (125 MHz,  $\text{CDCl}_3$ )  $\delta$  174.4, 144.1, 128.5, 128.0, 126.1, 83.0, 51.4, 48.6, 34.3, 27.2, 24.8, 24.5, 12.1; **HRMS** (ESI-TOF) Calcd for  $\text{C}_{13}\text{H}_{18}\text{BO}_3$  [ $\text{M}-\text{C}_6\text{H}_{11}\text{O}$ ] 232.1385, found 232.1384 (Note: Compound ( $\pm$ )-**9** was hydrolyzed to boronic acid, followed by dehydration to the corresponding molecular weight.)

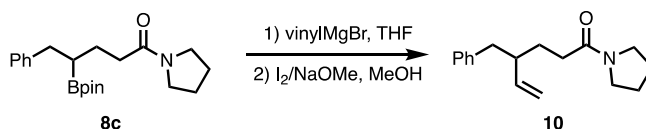

**Scheme S12:** Synthesis of compound **10** from arylborylated product **8c**.

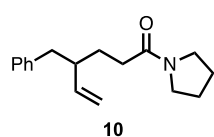

**4-benzyl-1-(pyrrolidin-1-yl)hex-5-en-1-one (10):** The title compound was prepared by adapting a literature procedure.<sup>[19]</sup> To a solution of **8c** (18

mg, 0.05 mmol) in THF (0.5 mL) was added vinylmagnesium bromide (0.2 mL, 1 M, 0.2 mmol) dropwise at room temperature. The reaction mixture was then stirred for 30 minutes. Next, a solution of iodine (51 mg, 0.2 mmol in 0.67 mL MeOH) was slowly added to the reaction flask at  $-78\text{ }^{\circ}\text{C}$ . After further stirring at this temperature for 30 minutes, a solution of NaOMe (22 mg, 0.4 mmol in 0.83 mL MeOH) was added dropwise to the reaction mixture. After warming to room temperature, the resultant mixture was stirred for another 1.5 h. Upon completion, the reaction was diluted with pentane (10 mL) and wash with saturated  $\text{Na}_2\text{S}_2\text{O}_3$  (5 mL) and brine (5 mL). The organic phase was dried over  $\text{Na}_2\text{SO}_4$ , concentrated under vacuum and purified by preparative TLC (2:1 hexanes:EtOAc) to afford the product as a colorless oil (11.2 mg, 87% yield).  $^1\text{H NMR}$  (500 MHz,  $\text{CDCl}_3$ )  $\delta$  7.35–7.21 (m, 2H), 7.17–7.05 (m, 3H), 5.59 (ddd,  $J = 17.1, 10.2, 8.7$  Hz, 1H), 5.01–4.77 (m, 2H), 3.43 (t,  $J = 6.9$  Hz, 2H), 3.33 (t,  $J = 6.8$  Hz, 2H), 2.67 (qd,  $J = 13.6, 7.1$  Hz, 2H), 2.41–2.20 (m, 2H), 2.16 (ddd,  $J = 15.6, 9.8, 6.3$  Hz, 1H), 1.99–1.73 (m, 5H), 1.58 (dtd,  $J = 13.6, 9.9, 5.3$  Hz, 1H);  $^{13}\text{C NMR}$  (125 MHz,  $\text{CDCl}_3$ )  $\delta$  171.5, 141.8, 140.2, 129.3, 128.1, 125.8, 115.3, 46.5, 45.6, 42.0, 32.5, 29.1, 26.1, 24.4; **HRMS** (ESI-TOF) Calcd for  $\text{C}_{17}\text{H}_{24}\text{NO}$   $[\text{M}+\text{H}]$  258.1858, found 258.1858.

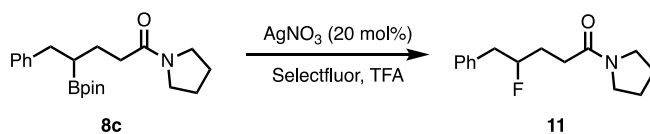

**Scheme S13:** Fluorination of arylborylated product **8c**.

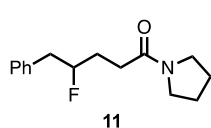

**4-fluoro-5-phenyl-1-(pyrrolidin-1-yl)pentan-1-one (11):** The title compound was prepared by adapting a literature procedure.<sup>[20]</sup> To a 15-mL reaction tube containing a Teflon-coated magnetic stir bar were added compound **8c** (17.9 mg, 0.05 mmol),  $\text{AgNO}_3$  (1.7 mg, 0.01 mmol), and Selectfluor (53 mg, 0.15 mmol). The reaction vessel was evacuated and backfilled with  $\text{N}_2$  ( $\times 3$ ).  $\text{CH}_2\text{Cl}_2$  (0.25 mL),  $\text{H}_2\text{O}$  (0.25 mL), and TFA (14.5  $\mu\text{L}$ , 0.2 mmol) were then added. The reaction mixture was stirred at  $50\text{ }^{\circ}\text{C}$  for 24 h. After cooling to room temperature, the reaction was quenched by slow addition of saturated  $\text{NaHCO}_3$  (4 mL), and the resulting mixture was extracted with EtOAc ( $3 \times 5$  mL). The combined organic layers were concentrated under vacuum and purified by silica gel chromatography (2:1 hexanes:EtOAc) to afford the product as a colorless oil (4.6 mg, 37% yield).  $^1\text{H NMR}$  (600 MHz,  $\text{CDCl}_3$ )  $\delta$  7.40–7.09 (m, 5H), 4.76 (d,  $J = 49.3, 9.8, 7.5, 4.9, 2.7$  Hz, 1H), 3.55–3.36 (m, 4H), 3.08–2.76 (m, 2H), 2.57–2.32 (m, 2H), 2.18–2.00 (m, 1H), 1.98–1.77 (m, 5H);  $^{13}\text{C NMR}$  (150 MHz,  $\text{CDCl}_3$ )  $\delta$  170.5, 137.1 (d,  $J = 4.4$  Hz), 129.4, 128.4, 126.5, 94.0 (d,  $J = 170.6$  Hz), 46.5, 45.6, 41.8 (d,  $J = 21.0$  Hz), 30.0 (d,  $J = 9.0$  Hz), 29.9 (d,  $J = 8.2$  Hz), 26.1, 24.4;  $^{19}\text{F NMR}$  (376 MHz,  $\text{CDCl}_3$ )  $\delta$   $-181.8$ ; **HRMS** (ESI-TOF) Calcd for  $\text{C}_{15}\text{H}_{21}\text{FNO}$   $[\text{M}+\text{H}]$  250.1607, found 250.1610.

## X-RAY CRYSTALLOGRAPHY

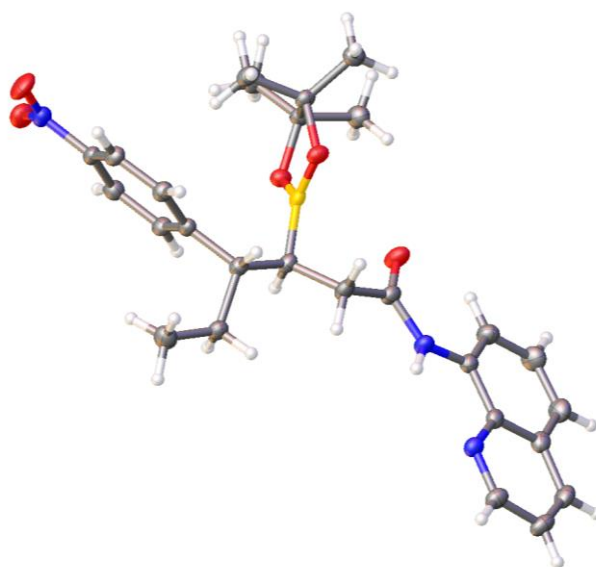

**Table S3.** Crystal data and structure refinement for **(±)-4u**.

|                      |                                                                 |                   |
|----------------------|-----------------------------------------------------------------|-------------------|
| Report date          | 2019-04-01                                                      |                   |
| Identification code  | engle177                                                        |                   |
| Empirical formula    | C <sub>27</sub> H <sub>32</sub> B N <sub>3</sub> O <sub>5</sub> |                   |
| Molecular formula    | C <sub>27</sub> H <sub>32</sub> B N <sub>3</sub> O <sub>5</sub> |                   |
| Formula weight       | 489.36                                                          |                   |
| Temperature          | 100.0 K                                                         |                   |
| Wavelength           | 1.54178 Å                                                       |                   |
| Crystal system       | Monoclinic                                                      |                   |
| Space group          | P 1 21/c 1                                                      |                   |
| Unit cell dimensions | a = 14.9780(2) Å                                                | α = 90°.          |
|                      | b = 16.2305(2) Å                                                | β = 95.8100(10)°. |
|                      | c = 20.9234(2) Å                                                | γ = 90°.          |
| Volume               | 5060.36(10) Å <sup>3</sup>                                      |                   |
| Z                    | 8                                                               |                   |

|                                   |                                             |
|-----------------------------------|---------------------------------------------|
| Density (calculated)              | 1.285 Mg/m <sup>3</sup>                     |
| Absorption coefficient            | 0.716 mm <sup>-1</sup>                      |
| F(000)                            | 2080                                        |
| Crystal size                      | 0.15 x 0.15 x 0.1 mm <sup>3</sup>           |
| Crystal color, habit              | clear colourless block                      |
| Theta range for data collection   | 2.965 to 70.125°.                           |
| Index ranges                      | -18<=h<=18, -19<=k<=19, -25<=l<=25          |
| Reflections collected             | 85700                                       |
| Independent reflections           | 9620 [R(int) = 0.0308]                      |
| Completeness to theta = 67.679°   | 100.0 %                                     |
| Absorption correction             | Semi-empirical from equivalents             |
| Max. and min. transmission        | 0.5220 and 0.4402                           |
| Refinement method                 | Full-matrix least-squares on F <sup>2</sup> |
| Data / restraints / parameters    | 9620 / 100 / 718                            |
| Goodness-of-fit on F <sup>2</sup> | 1.019                                       |
| Final R indices [I>2sigma(I)]     | R1 = 0.0367, wR2 = 0.0905                   |
| R indices (all data)              | R1 = 0.0411, wR2 = 0.0939                   |
| Extinction coefficient            | n/a                                         |
| Largest diff. peak and hole       | 0.349 and -0.232 e.Å <sup>-3</sup>          |

**Table S4.** Atomic coordinates ( $\times 10^4$ ) and equivalent isotropic displacement parameters ( $\text{\AA}^2 \times 10^3$ ) for ( $\pm$ )-4u. U(eq) is defined as one third of the trace of the orthogonalized  $U^{ij}$  tensor.

|       | x       | y        | z        | U(eq) |
|-------|---------|----------|----------|-------|
| O(1)  | 4474(1) | -429(1)  | 8279(1)  | 33(1) |
| O(2)  | 5314(1) | 764(1)   | 7136(1)  | 23(1) |
| O(3)  | 4233(1) | -152(1)  | 6743(1)  | 23(1) |
| O(4)  | 3552(1) | 2517(1)  | 4265(1)  | 41(1) |
| O(5)  | 2733(1) | 1420(1)  | 4217(1)  | 36(1) |
| N(1)  | 3417(1) | 383(1)   | 10330(1) | 23(1) |
| N(2)  | 3970(1) | 120(1)   | 9180(1)  | 24(1) |
| N(3)  | 3172(1) | 1957(1)  | 4520(1)  | 28(1) |
| C(1)  | 3117(1) | 522(1)   | 10891(1) | 27(1) |
| C(2)  | 3056(1) | -84(1)   | 11366(1) | 31(1) |
| C(3)  | 3314(1) | -868(1)  | 11246(1) | 30(1) |
| C(4)  | 3618(1) | -1058(1) | 10647(1) | 25(1) |
| C(5)  | 3871(1) | -1862(1) | 10474(1) | 31(1) |
| C(6)  | 4137(1) | -2000(1) | 9881(1)  | 33(1) |
| C(7)  | 4184(1) | -1358(1) | 9428(1)  | 29(1) |
| C(8)  | 3959(1) | -566(1)  | 9584(1)  | 22(1) |
| C(9)  | 3661(1) | -404(1)  | 10202(1) | 21(1) |
| C(10) | 4206(1) | 163(1)   | 8568(1)  | 24(1) |
| C(11) | 4110(1) | 1009(1)  | 8268(1)  | 26(1) |
| C(12) | 3758(1) | 950(1)   | 7551(1)  | 22(1) |
| C(13) | 5670(1) | 357(1)   | 6592(1)  | 22(1) |
| C(14) | 6659(1) | 189(1)   | 6763(1)  | 29(1) |

|       |         |          |         |       |
|-------|---------|----------|---------|-------|
| C(15) | 5547(1) | 956(1)   | 6029(1) | 28(1) |
| C(16) | 5062(1) | -422(1)  | 6496(1) | 23(1) |
| C(17) | 4843(1) | -683(1)  | 5800(1) | 29(1) |
| C(18) | 5415(1) | -1153(1) | 6903(1) | 30(1) |
| C(19) | 3544(1) | 1830(1)  | 7283(1) | 22(1) |
| C(20) | 2698(1) | 2186(1)  | 7546(1) | 26(1) |
| C(21) | 2370(1) | 3004(1)  | 7256(1) | 33(1) |
| C(22) | 3438(1) | 1849(1)  | 6554(1) | 22(1) |
| C(23) | 3852(1) | 2470(1)  | 6231(1) | 24(1) |
| C(24) | 3756(1) | 2517(1)  | 5565(1) | 25(1) |
| C(25) | 3253(1) | 1920(1)  | 5224(1) | 23(1) |
| C(26) | 2828(1) | 1293(1)  | 5525(1) | 25(1) |
| C(27) | 2916(1) | 1268(1)  | 6192(1) | 24(1) |
| B(1)  | 4452(1) | 492(1)   | 7154(1) | 21(1) |
| O(6)  | 1652(1) | 4494(1)  | 3114(1) | 32(1) |
| O(9)  | 2256(1) | 6557(1)  | -737(1) | 49(1) |
| O(10) | 1322(1) | 7565(1)  | -740(1) | 48(1) |
| N(4)  | 1094(1) | 5154(1)  | 5293(1) | 26(1) |
| N(5)  | 1652(1) | 4967(1)  | 4135(1) | 24(1) |
| N(6)  | 1808(1) | 7045(1)  | -460(1) | 32(1) |
| C(28) | 809(1)  | 5256(1)  | 5863(1) | 31(1) |
| C(29) | 535(1)  | 4612(1)  | 6250(1) | 34(1) |
| C(30) | 565(1)  | 3827(1)  | 6029(1) | 32(1) |
| C(31) | 865(1)  | 3674(1)  | 5421(1) | 28(1) |
| C(32) | 905(1)  | 2879(1)  | 5151(1) | 33(1) |
| C(33) | 1182(1) | 2784(1)  | 4557(1) | 34(1) |
| C(34) | 1444(1) | 3464(1)  | 4197(1) | 29(1) |

|        |          |          |          |       |
|--------|----------|----------|----------|-------|
| C(35)  | 1416(1)  | 4247(1)  | 4446(1)  | 23(1) |
| C(36)  | 1121(1)  | 4367(1)  | 5068(1)  | 23(1) |
| C(37)  | 1721(1)  | 5065(1)  | 3499(1)  | 23(1) |
| C(38)  | 1875(1)  | 5936(1)  | 3282(1)  | 25(1) |
| C(39)  | 1943(1)  | 5954(1)  | 2554(1)  | 23(1) |
| C(46)  | 1840(1)  | 6845(1)  | 2292(1)  | 25(1) |
| C(47)  | 2525(1)  | 7465(1)  | 2623(1)  | 30(1) |
| C(48)  | 3503(1)  | 7276(1)  | 2549(1)  | 33(1) |
| C(49)  | 1858(1)  | 6882(1)  | 1566(1)  | 25(1) |
| C(50)  | 2390(1)  | 6361(1)  | 1232(1)  | 26(1) |
| C(51)  | 2377(1)  | 6408(1)  | 566(1)   | 27(1) |
| C(52)  | 1839(1)  | 6996(1)  | 242(1)   | 26(1) |
| C(53)  | 1321(1)  | 7537(1)  | 558(1)   | 32(1) |
| C(54)  | 1332(1)  | 7466(1)  | 1219(1)  | 31(1) |
| B(2B)  | 1180(1)  | 5392(1)  | 2201(1)  | 23(1) |
| O(7A)  | 1294(1)  | 4881(1)  | 1692(1)  | 22(1) |
| O(8A)  | 296(1)   | 5480(3)  | 2319(3)  | 26(1) |
| C(40A) | 436(1)   | 4488(1)  | 1495(1)  | 24(1) |
| C(41A) | 324(1)   | 4435(1)  | 768(1)   | 33(1) |
| C(42A) | 473(1)   | 3625(1)  | 1782(1)  | 33(1) |
| C(43A) | -247(1)  | 5068(1)  | 1792(1)  | 29(1) |
| C(44A) | -603(1)  | 5755(1)  | 1334(1)  | 51(1) |
| C(45A) | -1016(1) | 4629(1)  | 2063(1)  | 50(1) |
| O(7B)  | 1159(9)  | 5112(10) | 1590(4)  | 22(1) |
| O(8B)  | 278(11)  | 5400(40) | 2270(30) | 26(1) |
| C(40B) | 246(9)   | 4865(8)  | 1360(6)  | 24(1) |
| C(41B) | 78(15)   | 5540(11) | 857(8)   | 41(4) |



|        |           |          |          |       |
|--------|-----------|----------|----------|-------|
| C(42B) | 365(16)   | 4023(11) | 1060(11) | 41(4) |
| C(43B) | -373(12)  | 4844(12) | 1918(9)  | 29(1) |
| C(44B) | -1207(13) | 5362(17) | 1743(13) | 59(6) |
| C(45B) | -211(17)  | 4069(10) | 2325(9)  | 46(4) |

---

**Table S5.** Bond lengths [Å] and angles [°] for ( $\pm$ )-4u.

|            |            |              |            |
|------------|------------|--------------|------------|
| O(1)-C(10) | 1.2231(16) | C(4)-C(5)    | 1.4148(19) |
| O(2)-C(13) | 1.4623(14) | C(4)-C(9)    | 1.4180(17) |
| O(2)-B(1)  | 1.3680(17) | C(5)-H(5A)   | 0.9500     |
| O(3)-C(16) | 1.4599(14) | C(5)-C(6)    | 1.359(2)   |
| O(3)-B(1)  | 1.3715(16) | C(6)-H(6)    | 0.9500     |
| O(4)-N(3)  | 1.2239(16) | C(6)-C(7)    | 1.4151(19) |
| O(5)-N(3)  | 1.2276(16) | C(7)-H(7)    | 0.9500     |
| N(1)-C(1)  | 1.3182(16) | C(7)-C(8)    | 1.3768(18) |
| N(1)-C(9)  | 1.3638(16) | C(8)-C(9)    | 1.4335(17) |
| N(2)-H(2)  | 0.858(13)  | C(10)-C(11)  | 1.5096(18) |
| N(2)-C(8)  | 1.3998(16) | C(11)-H(11A) | 0.9900     |
| N(2)-C(10) | 1.3645(16) | C(11)-H(11B) | 0.9900     |
| N(3)-C(25) | 1.4670(15) | C(11)-C(12)  | 1.5430(16) |
| C(1)-H(1)  | 0.9500     | C(12)-H(12)  | 1.0000     |
| C(1)-C(2)  | 1.4066(19) | C(12)-C(19)  | 1.5564(17) |
| C(2)-H(2A) | 0.9500     | C(12)-B(1)   | 1.5807(18) |
| C(2)-C(3)  | 1.361(2)   | C(13)-C(14)  | 1.5128(17) |
| C(3)-H(3)  | 0.9500     | C(13)-C(15)  | 1.5246(17) |
| C(3)-C(4)  | 1.4106(19) | C(13)-C(16)  | 1.5590(17) |

|              |            |             |            |
|--------------|------------|-------------|------------|
| C(14)-H(14A) | 0.9800     | C(24)-H(24) | 0.9500     |
| C(14)-H(14B) | 0.9800     | C(24)-C(25) | 1.3814(19) |
| C(14)-H(14C) | 0.9800     | C(25)-C(26) | 1.3842(18) |
| C(15)-H(15A) | 0.9800     | C(26)-H(26) | 0.9500     |
| C(15)-H(15B) | 0.9800     | C(26)-C(27) | 1.3905(18) |
| C(15)-H(15C) | 0.9800     | C(27)-H(27) | 0.9500     |
| C(16)-C(17)  | 1.5190(17) | O(6)-C(37)  | 1.2243(16) |
| C(16)-C(18)  | 1.5236(18) | O(9)-N(6)   | 1.2213(17) |
| C(17)-H(17A) | 0.9800     | O(10)-N(6)  | 1.2242(17) |
| C(17)-H(17B) | 0.9800     | N(4)-C(28)  | 1.3156(17) |
| C(17)-H(17C) | 0.9800     | N(4)-C(36)  | 1.3630(17) |
| C(18)-H(18A) | 0.9800     | N(5)-H(5)   | 0.868(13)  |
| C(18)-H(18B) | 0.9800     | N(5)-C(35)  | 1.4010(16) |
| C(18)-H(18C) | 0.9800     | N(5)-C(37)  | 1.3550(16) |
| C(19)-H(19)  | 1.0000     | N(6)-C(52)  | 1.4681(16) |
| C(19)-C(20)  | 1.5441(17) | C(28)-H(28) | 0.9500     |
| C(19)-C(22)  | 1.5187(16) | C(28)-C(29) | 1.408(2)   |
| C(20)-H(20A) | 0.9900     | C(29)-H(29) | 0.9500     |
| C(20)-H(20B) | 0.9900     | C(29)-C(30) | 1.358(2)   |
| C(20)-C(21)  | 1.5203(19) | C(30)-H(30) | 0.9500     |
| C(21)-H(21A) | 0.9800     | C(30)-C(31) | 1.413(2)   |
| C(21)-H(21B) | 0.9800     | C(31)-C(32) | 1.413(2)   |
| C(21)-H(21C) | 0.9800     | C(31)-C(36) | 1.4184(18) |
| C(22)-C(23)  | 1.3929(18) | C(32)-H(32) | 0.9500     |
| C(22)-C(27)  | 1.3975(18) | C(32)-C(33) | 1.359(2)   |
| C(23)-H(23)  | 0.9500     | C(33)-H(33) | 0.9500     |
| C(23)-C(24)  | 1.3872(17) | C(33)-C(34) | 1.413(2)   |

|              |            |               |            |
|--------------|------------|---------------|------------|
| C(34)-H(34)  | 0.9500     | C(53)-C(54)   | 1.3875(19) |
| C(34)-C(35)  | 1.3761(19) | C(54)-H(54)   | 0.9500     |
| C(35)-C(36)  | 1.4291(17) | B(2B)-O(7A)   | 1.3753(17) |
| C(37)-C(38)  | 1.5093(17) | B(2B)-O(8A)   | 1.3782(19) |
| C(38)-H(38A) | 0.9900     | B(2B)-O(7B)   | 1.355(8)   |
| C(38)-H(38B) | 0.9900     | B(2B)-O(8B)   | 1.372(9)   |
| C(38)-C(39)  | 1.5376(16) | O(7A)-C(40A)  | 1.4568(16) |
| C(39)-H(39)  | 1.0000     | O(8A)-C(43A)  | 1.464(3)   |
| C(39)-C(46)  | 1.5496(17) | C(40A)-C(41A) | 1.5175(19) |
| C(39)-B(2B)  | 1.5848(19) | C(40A)-C(42A) | 1.523(2)   |
| C(46)-H(46)  | 1.0000     | C(40A)-C(43A) | 1.563(2)   |
| C(46)-C(47)  | 1.5489(18) | C(41A)-H(41A) | 0.9800     |
| C(46)-C(49)  | 1.5226(17) | C(41A)-H(41B) | 0.9800     |
| C(47)-H(47A) | 0.9900     | C(41A)-H(41C) | 0.9800     |
| C(47)-H(47B) | 0.9900     | C(42A)-H(42A) | 0.9800     |
| C(47)-C(48)  | 1.519(2)   | C(42A)-H(42B) | 0.9800     |
| C(48)-H(48A) | 0.9800     | C(42A)-H(42C) | 0.9800     |
| C(48)-H(48B) | 0.9800     | C(43A)-C(44A) | 1.531(2)   |
| C(48)-H(48C) | 0.9800     | C(43A)-C(45A) | 1.512(2)   |
| C(49)-C(50)  | 1.3975(19) | C(44A)-H(44A) | 0.9800     |
| C(49)-C(54)  | 1.3894(19) | C(44A)-H(44B) | 0.9800     |
| C(50)-H(50)  | 0.9500     | C(44A)-H(44C) | 0.9800     |
| C(50)-C(51)  | 1.3927(18) | C(45A)-H(45A) | 0.9800     |
| C(51)-H(51)  | 0.9500     | C(45A)-H(45B) | 0.9800     |
| C(51)-C(52)  | 1.3807(19) | C(45A)-H(45C) | 0.9800     |
| C(52)-C(53)  | 1.383(2)   | O(7B)-C(40B)  | 1.459(8)   |
| C(53)-H(53)  | 0.9500     | O(8B)-C(43B)  | 1.461(9)   |

|                 |            |                 |            |
|-----------------|------------|-----------------|------------|
| C(40B)-C(41B)   | 1.521(8)   | N(1)-C(1)-C(2)  | 124.09(13) |
| C(40B)-C(42B)   | 1.522(8)   | C(2)-C(1)-H(1)  | 118.0      |
| C(40B)-C(43B)   | 1.564(10)  | C(1)-C(2)-H(2A) | 120.5      |
| C(41B)-H(41D)   | 0.9800     | C(3)-C(2)-C(1)  | 119.01(12) |
| C(41B)-H(41E)   | 0.9800     | C(3)-C(2)-H(2A) | 120.5      |
| C(41B)-H(41F)   | 0.9800     | C(2)-C(3)-H(3)  | 120.3      |
| C(42B)-H(42D)   | 0.9800     | C(2)-C(3)-C(4)  | 119.41(12) |
| C(42B)-H(42E)   | 0.9800     | C(4)-C(3)-H(3)  | 120.3      |
| C(42B)-H(42F)   | 0.9800     | C(3)-C(4)-C(5)  | 123.28(12) |
| C(43B)-C(44B)   | 1.519(8)   | C(3)-C(4)-C(9)  | 117.38(12) |
| C(43B)-C(45B)   | 1.525(8)   | C(5)-C(4)-C(9)  | 119.34(12) |
| C(44B)-H(44D)   | 0.9800     | C(4)-C(5)-H(5A) | 120.1      |
| C(44B)-H(44E)   | 0.9800     | C(6)-C(5)-C(4)  | 119.85(12) |
| C(44B)-H(44F)   | 0.9800     | C(6)-C(5)-H(5A) | 120.1      |
| C(45B)-H(45D)   | 0.9800     | C(5)-C(6)-H(6)  | 119.1      |
| C(45B)-H(45E)   | 0.9800     | C(5)-C(6)-C(7)  | 121.82(13) |
| C(45B)-H(45F)   | 0.9800     | C(7)-C(6)-H(6)  | 119.1      |
| B(1)-O(2)-C(13) | 107.19(9)  | C(6)-C(7)-H(7)  | 120.0      |
| B(1)-O(3)-C(16) | 107.02(9)  | C(8)-C(7)-C(6)  | 119.98(12) |
| C(1)-N(1)-C(9)  | 117.28(11) | C(8)-C(7)-H(7)  | 120.0      |
| C(8)-N(2)-H(2)  | 114.1(11)  | N(2)-C(8)-C(9)  | 115.08(11) |
| C(10)-N(2)-H(2) | 117.0(11)  | C(7)-C(8)-N(2)  | 125.55(11) |
| C(10)-N(2)-C(8) | 128.93(11) | C(7)-C(8)-C(9)  | 119.35(11) |
| O(4)-N(3)-O(5)  | 123.34(11) | N(1)-C(9)-C(4)  | 122.78(11) |
| O(4)-N(3)-C(25) | 118.29(11) | N(1)-C(9)-C(8)  | 117.57(11) |
| O(5)-N(3)-C(25) | 118.37(11) | C(4)-C(9)-C(8)  | 119.64(11) |
| N(1)-C(1)-H(1)  | 118.0      | O(1)-C(10)-N(2) | 123.49(12) |

|                     |            |                     |            |
|---------------------|------------|---------------------|------------|
| O(1)-C(10)-C(11)    | 122.11(11) | C(13)-C(15)-H(15B)  | 109.5      |
| N(2)-C(10)-C(11)    | 114.40(11) | C(13)-C(15)-H(15C)  | 109.5      |
| C(10)-C(11)-H(11A)  | 109.5      | H(15A)-C(15)-H(15B) | 109.5      |
| C(10)-C(11)-H(11B)  | 109.5      | H(15A)-C(15)-H(15C) | 109.5      |
| C(10)-C(11)-C(12)   | 110.85(10) | H(15B)-C(15)-H(15C) | 109.5      |
| H(11A)-C(11)-H(11B) | 108.1      | O(3)-C(16)-C(13)    | 102.56(9)  |
| C(12)-C(11)-H(11A)  | 109.5      | O(3)-C(16)-C(17)    | 108.31(10) |
| C(12)-C(11)-H(11B)  | 109.5      | O(3)-C(16)-C(18)    | 107.15(10) |
| C(11)-C(12)-H(12)   | 108.3      | C(17)-C(16)-C(13)   | 114.60(10) |
| C(11)-C(12)-C(19)   | 109.31(10) | C(17)-C(16)-C(18)   | 110.30(11) |
| C(11)-C(12)-B(1)    | 111.22(10) | C(18)-C(16)-C(13)   | 113.26(10) |
| C(19)-C(12)-H(12)   | 108.3      | C(16)-C(17)-H(17A)  | 109.5      |
| C(19)-C(12)-B(1)    | 111.37(10) | C(16)-C(17)-H(17B)  | 109.5      |
| B(1)-C(12)-H(12)    | 108.3      | C(16)-C(17)-H(17C)  | 109.5      |
| O(2)-C(13)-C(14)    | 108.79(10) | H(17A)-C(17)-H(17B) | 109.5      |
| O(2)-C(13)-C(15)    | 106.79(10) | H(17A)-C(17)-H(17C) | 109.5      |
| O(2)-C(13)-C(16)    | 102.22(9)  | H(17B)-C(17)-H(17C) | 109.5      |
| C(14)-C(13)-C(15)   | 109.71(11) | C(16)-C(18)-H(18A)  | 109.5      |
| C(14)-C(13)-C(16)   | 115.42(11) | C(16)-C(18)-H(18B)  | 109.5      |
| C(15)-C(13)-C(16)   | 113.23(10) | C(16)-C(18)-H(18C)  | 109.5      |
| C(13)-C(14)-H(14A)  | 109.5      | H(18A)-C(18)-H(18B) | 109.5      |
| C(13)-C(14)-H(14B)  | 109.5      | H(18A)-C(18)-H(18C) | 109.5      |
| C(13)-C(14)-H(14C)  | 109.5      | H(18B)-C(18)-H(18C) | 109.5      |
| H(14A)-C(14)-H(14B) | 109.5      | C(12)-C(19)-H(19)   | 107.7      |
| H(14A)-C(14)-H(14C) | 109.5      | C(20)-C(19)-C(12)   | 111.21(10) |
| H(14B)-C(14)-H(14C) | 109.5      | C(20)-C(19)-H(19)   | 107.7      |
| C(13)-C(15)-H(15A)  | 109.5      | C(22)-C(19)-C(12)   | 112.14(10) |

|                     |            |                   |            |
|---------------------|------------|-------------------|------------|
| C(22)-C(19)-H(19)   | 107.7      | C(25)-C(26)-C(27) | 118.45(12) |
| C(22)-C(19)-C(20)   | 110.16(10) | C(27)-C(26)-H(26) | 120.8      |
| C(19)-C(20)-H(20A)  | 108.4      | C(22)-C(27)-H(27) | 119.5      |
| C(19)-C(20)-H(20B)  | 108.4      | C(26)-C(27)-C(22) | 120.97(11) |
| H(20A)-C(20)-H(20B) | 107.5      | C(26)-C(27)-H(27) | 119.5      |
| C(21)-C(20)-C(19)   | 115.31(11) | O(2)-B(1)-O(3)    | 113.25(11) |
| C(21)-C(20)-H(20A)  | 108.4      | O(2)-B(1)-C(12)   | 122.41(11) |
| C(21)-C(20)-H(20B)  | 108.4      | O(3)-B(1)-C(12)   | 123.99(11) |
| C(20)-C(21)-H(21A)  | 109.5      | C(28)-N(4)-C(36)  | 117.03(11) |
| C(20)-C(21)-H(21B)  | 109.5      | C(35)-N(5)-H(5)   | 114.0(11)  |
| C(20)-C(21)-H(21C)  | 109.5      | C(37)-N(5)-H(5)   | 117.1(11)  |
| H(21A)-C(21)-H(21B) | 109.5      | C(37)-N(5)-C(35)  | 127.11(11) |
| H(21A)-C(21)-H(21C) | 109.5      | O(9)-N(6)-O(10)   | 123.26(12) |
| H(21B)-C(21)-H(21C) | 109.5      | O(9)-N(6)-C(52)   | 118.44(12) |
| C(23)-C(22)-C(19)   | 119.72(11) | O(10)-N(6)-C(52)  | 118.28(12) |
| C(23)-C(22)-C(27)   | 118.57(11) | N(4)-C(28)-H(28)  | 117.7      |
| C(27)-C(22)-C(19)   | 121.69(11) | N(4)-C(28)-C(29)  | 124.58(14) |
| C(22)-C(23)-H(23)   | 119.3      | C(29)-C(28)-H(28) | 117.7      |
| C(24)-C(23)-C(22)   | 121.37(12) | C(28)-C(29)-H(29) | 120.7      |
| C(24)-C(23)-H(23)   | 119.3      | C(30)-C(29)-C(28) | 118.55(13) |
| C(23)-C(24)-H(24)   | 120.8      | C(30)-C(29)-H(29) | 120.7      |
| C(25)-C(24)-C(23)   | 118.39(12) | C(29)-C(30)-H(30) | 120.1      |
| C(25)-C(24)-H(24)   | 120.8      | C(29)-C(30)-C(31) | 119.79(12) |
| C(24)-C(25)-N(3)    | 118.38(11) | C(31)-C(30)-H(30) | 120.1      |
| C(24)-C(25)-C(26)   | 122.22(11) | C(30)-C(31)-C(36) | 117.10(13) |
| C(26)-C(25)-N(3)    | 119.39(12) | C(32)-C(31)-C(30) | 123.43(12) |
| C(25)-C(26)-H(26)   | 120.8      | C(32)-C(31)-C(36) | 119.46(12) |

|                     |            |                     |            |
|---------------------|------------|---------------------|------------|
| C(31)-C(32)-H(32)   | 120.1      | C(46)-C(39)-H(39)   | 109.1      |
| C(33)-C(32)-C(31)   | 119.87(13) | C(46)-C(39)-B(2B)   | 109.32(10) |
| C(33)-C(32)-H(32)   | 120.1      | B(2B)-C(39)-H(39)   | 109.1      |
| C(32)-C(33)-H(33)   | 119.1      | C(39)-C(46)-H(46)   | 106.6      |
| C(32)-C(33)-C(34)   | 121.75(13) | C(47)-C(46)-C(39)   | 114.22(11) |
| C(34)-C(33)-H(33)   | 119.1      | C(47)-C(46)-H(46)   | 106.6      |
| C(33)-C(34)-H(34)   | 120.1      | C(49)-C(46)-C(39)   | 112.25(10) |
| C(35)-C(34)-C(33)   | 119.86(12) | C(49)-C(46)-H(46)   | 106.6      |
| C(35)-C(34)-H(34)   | 120.1      | C(49)-C(46)-C(47)   | 110.02(10) |
| N(5)-C(35)-C(36)    | 115.22(11) | C(46)-C(47)-H(47A)  | 108.5      |
| C(34)-C(35)-N(5)    | 125.08(12) | C(46)-C(47)-H(47B)  | 108.5      |
| C(34)-C(35)-C(36)   | 119.71(12) | H(47A)-C(47)-H(47B) | 107.5      |
| N(4)-C(36)-C(31)    | 122.96(12) | C(48)-C(47)-C(46)   | 115.16(11) |
| N(4)-C(36)-C(35)    | 117.69(11) | C(48)-C(47)-H(47A)  | 108.5      |
| C(31)-C(36)-C(35)   | 119.35(12) | C(48)-C(47)-H(47B)  | 108.5      |
| O(6)-C(37)-N(5)     | 123.15(12) | C(47)-C(48)-H(48A)  | 109.5      |
| O(6)-C(37)-C(38)    | 121.12(11) | C(47)-C(48)-H(48B)  | 109.5      |
| N(5)-C(37)-C(38)    | 115.72(11) | C(47)-C(48)-H(48C)  | 109.5      |
| C(37)-C(38)-H(38A)  | 109.7      | H(48A)-C(48)-H(48B) | 109.5      |
| C(37)-C(38)-H(38B)  | 109.7      | H(48A)-C(48)-H(48C) | 109.5      |
| C(37)-C(38)-C(39)   | 110.02(10) | H(48B)-C(48)-H(48C) | 109.5      |
| H(38A)-C(38)-H(38B) | 108.2      | C(50)-C(49)-C(46)   | 123.00(11) |
| C(39)-C(38)-H(38A)  | 109.7      | C(54)-C(49)-C(46)   | 118.75(11) |
| C(39)-C(38)-H(38B)  | 109.7      | C(54)-C(49)-C(50)   | 118.25(12) |
| C(38)-C(39)-H(39)   | 109.1      | C(49)-C(50)-H(50)   | 119.5      |
| C(38)-C(39)-C(46)   | 110.78(10) | C(51)-C(50)-C(49)   | 121.05(12) |
| C(38)-C(39)-B(2B)   | 109.50(10) | C(51)-C(50)-H(50)   | 119.5      |

|                      |            |                      |            |
|----------------------|------------|----------------------|------------|
| C(50)-C(51)-H(51)    | 120.7      | C(40A)-C(41A)-H(41B) | 109.5      |
| C(52)-C(51)-C(50)    | 118.54(12) | C(40A)-C(41A)-H(41C) | 109.5      |
| C(52)-C(51)-H(51)    | 120.7      | H(41A)-C(41A)-H(41B) | 109.5      |
| C(51)-C(52)-N(6)     | 119.13(12) | H(41A)-C(41A)-H(41C) | 109.5      |
| C(51)-C(52)-C(53)    | 122.14(12) | H(41B)-C(41A)-H(41C) | 109.5      |
| C(53)-C(52)-N(6)     | 118.72(12) | C(40A)-C(42A)-H(42A) | 109.5      |
| C(52)-C(53)-H(53)    | 120.9      | C(40A)-C(42A)-H(42B) | 109.5      |
| C(52)-C(53)-C(54)    | 118.17(13) | C(40A)-C(42A)-H(42C) | 109.5      |
| C(54)-C(53)-H(53)    | 120.9      | H(42A)-C(42A)-H(42B) | 109.5      |
| C(49)-C(54)-H(54)    | 119.1      | H(42A)-C(42A)-H(42C) | 109.5      |
| C(53)-C(54)-C(49)    | 121.81(13) | H(42B)-C(42A)-H(42C) | 109.5      |
| C(53)-C(54)-H(54)    | 119.1      | O(8A)-C(43A)-C(40A)  | 103.77(14) |
| O(7A)-B(2B)-C(39)    | 124.61(11) | O(8A)-C(43A)-C(44A)  | 105.7(3)   |
| O(7A)-B(2B)-O(8A)    | 113.46(14) | O(8A)-C(43A)-C(45A)  | 108.6(2)   |
| O(8A)-B(2B)-C(39)    | 121.17(13) | C(44A)-C(43A)-C(40A) | 112.95(14) |
| O(7B)-B(2B)-C(39)    | 125.5(6)   | C(45A)-C(43A)-C(40A) | 114.78(14) |
| O(7B)-B(2B)-O(8B)    | 99(2)      | C(45A)-C(43A)-C(44A) | 110.33(16) |
| O(8B)-B(2B)-C(39)    | 128.5(12)  | C(43A)-C(44A)-H(44A) | 109.5      |
| B(2B)-O(7A)-C(40A)   | 107.89(10) | C(43A)-C(44A)-H(44B) | 109.5      |
| B(2B)-O(8A)-C(43A)   | 106.78(18) | C(43A)-C(44A)-H(44C) | 109.5      |
| O(7A)-C(40A)-C(41A)  | 108.20(11) | H(44A)-C(44A)-H(44B) | 109.5      |
| O(7A)-C(40A)-C(42A)  | 107.16(11) | H(44A)-C(44A)-H(44C) | 109.5      |
| O(7A)-C(40A)-C(43A)  | 102.65(11) | H(44B)-C(44A)-H(44C) | 109.5      |
| C(41A)-C(40A)-C(42A) | 109.76(12) | C(43A)-C(45A)-H(45A) | 109.5      |
| C(41A)-C(40A)-C(43A) | 115.00(13) | C(43A)-C(45A)-H(45B) | 109.5      |
| C(42A)-C(40A)-C(43A) | 113.42(12) | C(43A)-C(45A)-H(45C) | 109.5      |
| C(40A)-C(41A)-H(41A) | 109.5      | H(45A)-C(45A)-H(45B) | 109.5      |



|                      |           |                      |           |
|----------------------|-----------|----------------------|-----------|
| H(45A)-C(45A)-H(45C) | 109.5     | C(45B)-C(43B)-C(40B) | 111.2(14) |
| H(45B)-C(45A)-H(45C) | 109.5     | C(43B)-C(44B)-H(44D) | 109.5     |
| B(2B)-O(7B)-C(40B)   | 109.6(10) | C(43B)-C(44B)-H(44E) | 109.5     |
| B(2B)-O(8B)-C(43B)   | 124.2(19) | C(43B)-C(44B)-H(44F) | 109.5     |
| O(7B)-C(40B)-C(41B)  | 96.6(12)  | H(44D)-C(44B)-H(44E) | 109.5     |
| O(7B)-C(40B)-C(42B)  | 103.7(13) | H(44D)-C(44B)-H(44F) | 109.5     |
| O(7B)-C(40B)-C(43B)  | 111.4(12) | H(44E)-C(44B)-H(44F) | 109.5     |
| C(41B)-C(40B)-C(42B) | 112.3(15) | C(43B)-C(45B)-H(45D) | 109.5     |
| C(41B)-C(40B)-C(43B) | 117.6(13) | C(43B)-C(45B)-H(45E) | 109.5     |
| C(42B)-C(40B)-C(43B) | 113.0(14) | C(43B)-C(45B)-H(45F) | 109.5     |
| C(40B)-C(41B)-H(41D) | 109.5     | H(45D)-C(45B)-H(45E) | 109.5     |
| C(40B)-C(41B)-H(41E) | 109.5     | H(45D)-C(45B)-H(45F) | 109.5     |
| C(40B)-C(41B)-H(41F) | 109.5     | H(45E)-C(45B)-H(45F) | 109.5     |
| H(41D)-C(41B)-H(41E) | 109.5     |                      |           |
| H(41D)-C(41B)-H(41F) | 109.5     |                      |           |
| H(41E)-C(41B)-H(41F) | 109.5     |                      |           |
| C(40B)-C(42B)-H(42D) | 109.5     |                      |           |
| C(40B)-C(42B)-H(42E) | 109.5     |                      |           |
| C(40B)-C(42B)-H(42F) | 109.5     |                      |           |
| H(42D)-C(42B)-H(42E) | 109.5     |                      |           |
| H(42D)-C(42B)-H(42F) | 109.5     |                      |           |
| H(42E)-C(42B)-H(42F) | 109.5     |                      |           |
| O(8B)-C(43B)-C(40B)  | 87(2)     |                      |           |
| O(8B)-C(43B)-C(44B)  | 106(3)    |                      |           |
| O(8B)-C(43B)-C(45B)  | 100(4)    |                      |           |
| C(44B)-C(43B)-C(40B) | 110.0(15) |                      |           |
| C(44B)-C(43B)-C(45B) | 132.2(19) |                      |           |

---

Symmetry transformations used to generate equivalent atoms:

**Table S6.** Anisotropic displacement parameters ( $\text{\AA}^2 \times 10^3$ ) for **(±)-4u**. The anisotropic displacement factor exponent takes the form:  $-2\pi^2 [ h^2 a^{*2} U^{11} + \dots + 2 h k a^* b^* U^{12} ]$

---

|       | $U^{11}$ | $U^{22}$ | $U^{33}$ | $U^{23}$ | $U^{13}$ | $U^{12}$ |
|-------|----------|----------|----------|----------|----------|----------|
| O(1)  | 49(1)    | 29(1)    | 24(1)    | -1(1)    | 13(1)    | 6(1)     |
| O(2)  | 27(1)    | 24(1)    | 18(1)    | -4(1)    | 6(1)     | -2(1)    |
| O(3)  | 22(1)    | 26(1)    | 22(1)    | -3(1)    | 4(1)     | 1(1)     |
| O(4)  | 56(1)    | 44(1)    | 23(1)    | 12(1)    | 9(1)     | -2(1)    |
| O(5)  | 41(1)    | 44(1)    | 24(1)    | -7(1)    | 1(1)     | 3(1)     |
| N(1)  | 26(1)    | 24(1)    | 19(1)    | -1(1)    | 2(1)     | -1(1)    |
| N(2)  | 29(1)    | 24(1)    | 19(1)    | -1(1)    | 6(1)     | 4(1)     |
| N(3)  | 31(1)    | 34(1)    | 20(1)    | 2(1)     | 4(1)     | 9(1)     |
| C(1)  | 32(1)    | 28(1)    | 21(1)    | -4(1)    | 5(1)     | -3(1)    |
| C(2)  | 38(1)    | 38(1)    | 19(1)    | -2(1)    | 7(1)     | -7(1)    |
| C(3)  | 33(1)    | 34(1)    | 23(1)    | 8(1)     | 3(1)     | -5(1)    |
| C(4)  | 22(1)    | 27(1)    | 25(1)    | 5(1)     | 0(1)     | -3(1)    |
| C(5)  | 34(1)    | 26(1)    | 34(1)    | 8(1)     | 5(1)     | 0(1)     |
| C(6)  | 40(1)    | 22(1)    | 38(1)    | 2(1)     | 7(1)     | 4(1)     |
| C(7)  | 32(1)    | 29(1)    | 26(1)    | -1(1)    | 7(1)     | 4(1)     |
| C(8)  | 20(1)    | 25(1)    | 21(1)    | 2(1)     | 1(1)     | 1(1)     |
| C(9)  | 19(1)    | 24(1)    | 20(1)    | 1(1)     | -1(1)    | -1(1)    |
| C(10) | 26(1)    | 28(1)    | 18(1)    | -1(1)    | 4(1)     | 0(1)     |
| C(11) | 35(1)    | 28(1)    | 16(1)    | -1(1)    | 4(1)     | 2(1)     |

---

|       |       |       |       |       |       |       |
|-------|-------|-------|-------|-------|-------|-------|
| C(12) | 26(1) | 22(1) | 17(1) | 1(1)  | 4(1)  | -1(1) |
| C(13) | 25(1) | 25(1) | 17(1) | -2(1) | 4(1)  | 0(1)  |
| C(14) | 24(1) | 36(1) | 26(1) | -4(1) | 3(1)  | 0(1)  |
| C(15) | 35(1) | 29(1) | 22(1) | 3(1)  | 8(1)  | 0(1)  |
| C(16) | 23(1) | 25(1) | 20(1) | -2(1) | 4(1)  | 2(1)  |
| C(17) | 31(1) | 32(1) | 25(1) | -8(1) | 3(1)  | 1(1)  |
| C(18) | 34(1) | 25(1) | 31(1) | 3(1)  | 7(1)  | 4(1)  |
| C(19) | 26(1) | 21(1) | 19(1) | 0(1)  | 4(1)  | 0(1)  |
| C(20) | 30(1) | 30(1) | 21(1) | 0(1)  | 6(1)  | 5(1)  |
| C(21) | 36(1) | 31(1) | 33(1) | -2(1) | 3(1)  | 8(1)  |
| C(22) | 24(1) | 22(1) | 20(1) | 2(1)  | 5(1)  | 6(1)  |
| C(23) | 28(1) | 23(1) | 22(1) | 1(1)  | 4(1)  | 1(1)  |
| C(24) | 29(1) | 23(1) | 23(1) | 5(1)  | 7(1)  | 3(1)  |
| C(25) | 26(1) | 27(1) | 17(1) | 3(1)  | 4(1)  | 7(1)  |
| C(26) | 25(1) | 26(1) | 24(1) | 0(1)  | 2(1)  | 2(1)  |
| C(27) | 25(1) | 24(1) | 24(1) | 5(1)  | 6(1)  | 2(1)  |
| B(1)  | 27(1) | 22(1) | 14(1) | 4(1)  | 1(1)  | 2(1)  |
| O(6)  | 48(1) | 28(1) | 22(1) | -4(1) | 8(1)  | -3(1) |
| O(9)  | 64(1) | 60(1) | 24(1) | -2(1) | 11(1) | 12(1) |
| O(10) | 59(1) | 58(1) | 27(1) | 17(1) | 2(1)  | 11(1) |
| N(4)  | 30(1) | 28(1) | 20(1) | 2(1)  | 3(1)  | -2(1) |
| N(5)  | 32(1) | 23(1) | 19(1) | -1(1) | 4(1)  | -2(1) |
| N(6)  | 35(1) | 39(1) | 22(1) | 5(1)  | 3(1)  | -5(1) |
| C(28) | 37(1) | 36(1) | 22(1) | -1(1) | 5(1)  | -3(1) |
| C(29) | 32(1) | 49(1) | 21(1) | 5(1)  | 5(1)  | -4(1) |
| C(30) | 27(1) | 41(1) | 29(1) | 16(1) | 2(1)  | -3(1) |
| C(31) | 22(1) | 30(1) | 30(1) | 10(1) | -1(1) | -1(1) |

|        |       |       |       |        |        |        |
|--------|-------|-------|-------|--------|--------|--------|
| C(32)  | 30(1) | 26(1) | 44(1) | 12(1)  | 4(1)   | 0(1)   |
| C(33)  | 31(1) | 21(1) | 49(1) | 2(1)   | 3(1)   | 2(1)   |
| C(34)  | 26(1) | 28(1) | 32(1) | -1(1)  | 4(1)   | 3(1)   |
| C(35)  | 21(1) | 24(1) | 23(1) | 3(1)   | 1(1)   | 0(1)   |
| C(36)  | 21(1) | 26(1) | 22(1) | 4(1)   | -1(1)  | 0(1)   |
| C(37)  | 22(1) | 27(1) | 19(1) | -1(1)  | 3(1)   | 0(1)   |
| C(38)  | 31(1) | 25(1) | 18(1) | -1(1)  | 4(1)   | -3(1)  |
| C(39)  | 26(1) | 23(1) | 19(1) | 1(1)   | 5(1)   | 1(1)   |
| C(46)  | 29(1) | 23(1) | 23(1) | 1(1)   | 7(1)   | 2(1)   |
| C(47)  | 45(1) | 24(1) | 22(1) | -1(1)  | 6(1)   | -6(1)  |
| C(48)  | 43(1) | 27(1) | 29(1) | -2(1)  | -2(1)  | -6(1)  |
| C(49)  | 29(1) | 23(1) | 23(1) | 2(1)   | 4(1)   | -5(1)  |
| C(50)  | 28(1) | 26(1) | 24(1) | 6(1)   | 1(1)   | -2(1)  |
| C(51)  | 28(1) | 28(1) | 24(1) | 1(1)   | 5(1)   | -2(1)  |
| C(52)  | 29(1) | 31(1) | 19(1) | 4(1)   | 3(1)   | -6(1)  |
| C(53)  | 36(1) | 32(1) | 28(1) | 8(1)   | 4(1)   | 3(1)   |
| C(54)  | 38(1) | 28(1) | 27(1) | 3(1)   | 10(1)  | 4(1)   |
| B(2B)  | 27(1) | 24(1) | 18(1) | 3(1)   | 5(1)   | 0(1)   |
| O(7A)  | 22(1) | 24(1) | 19(1) | -2(1)  | 3(1)   | 0(1)   |
| O(8A)  | 28(1) | 28(1) | 22(1) | -6(1)  | 4(1)   | 0(1)   |
| C(40A) | 22(1) | 28(1) | 22(1) | -3(1)  | 0(1)   | -1(1)  |
| C(41A) | 39(1) | 37(1) | 23(1) | -7(1)  | 0(1)   | -1(1)  |
| C(42A) | 35(1) | 29(1) | 34(1) | 1(1)   | -3(1)  | -4(1)  |
| C(43A) | 23(1) | 36(1) | 28(1) | -7(1)  | 1(1)   | 0(1)   |
| C(44A) | 55(1) | 54(1) | 42(1) | -8(1)  | -12(1) | 28(1)  |
| C(45A) | 26(1) | 74(1) | 50(1) | -28(1) | 12(1)  | -13(1) |
| O(7B)  | 22(1) | 24(1) | 19(1) | -2(1)  | 3(1)   | 0(1)   |

|        |        |        |        |        |       |        |
|--------|--------|--------|--------|--------|-------|--------|
| O(8B)  | 28(1)  | 28(1)  | 22(1)  | -6(1)  | 4(1)  | 0(1)   |
| C(40B) | 22(1)  | 28(1)  | 22(1)  | -3(1)  | 0(1)  | -1(1)  |
| C(41B) | 54(9)  | 47(7)  | 18(6)  | 2(5)   | -9(5) | -1(7)  |
| C(42B) | 60(11) | 38(5)  | 30(10) | -16(5) | 16(8) | -13(6) |
| C(43B) | 23(1)  | 36(1)  | 28(1)  | -7(1)  | 1(1)  | 0(1)   |
| C(44B) | 29(6)  | 87(15) | 61(13) | -5(10) | -2(6) | 18(7)  |
| C(45B) | 73(13) | 31(5)  | 37(8)  | -5(5)  | 13(8) | -12(5) |

**Table S7.** Hydrogen coordinates ( $\times 10^4$ ) and isotropic displacement parameters ( $\text{\AA}^2 \times 10^3$ ) for  $(\pm)\text{-4u}$ .

|        | x        | y      | z       | U(eq) |
|--------|----------|--------|---------|-------|
| H(2)   | 3789(10) | 568(9) | 9343(7) | 28    |
| H(1)   | 2931     | 1066   | 10981   | 32    |
| H(2A)  | 2838     | 53     | 11763   | 38    |
| H(3)   | 3290     | -1284  | 11564   | 36    |
| H(5A)  | 3854     | -2303  | 10771   | 38    |
| H(6)   | 4296     | -2544  | 9767    | 40    |
| H(7)   | 4371     | -1473  | 9017    | 35    |
| H(11A) | 4700     | 1289   | 8312    | 31    |
| H(11B) | 3689     | 1341   | 8497    | 31    |
| H(12)  | 3187     | 625    | 7514    | 26    |
| H(14A) | 6979     | 712    | 6838    | 43    |
| H(14B) | 6898     | -106   | 6410    | 43    |
| H(14C) | 6739     | -148   | 7154    | 43    |

|        |          |         |         |    |
|--------|----------|---------|---------|----|
| H(15A) | 4905     | 1044    | 5906    | 43 |
| H(15B) | 5824     | 727     | 5663    | 43 |
| H(15C) | 5832     | 1483    | 6155    | 43 |
| H(17A) | 5402     | -783    | 5606    | 44 |
| H(17B) | 4503     | -245    | 5563    | 44 |
| H(17C) | 4484     | -1189   | 5783    | 44 |
| H(18A) | 5543     | -979    | 7351    | 45 |
| H(18B) | 5966     | -1360   | 6744    | 45 |
| H(18C) | 4962     | -1591   | 6875    | 45 |
| H(19)  | 4061     | 2194    | 7434    | 27 |
| H(20A) | 2207     | 1778    | 7471    | 32 |
| H(20B) | 2824     | 2258    | 8016    | 32 |
| H(21A) | 2176     | 2929    | 6798    | 50 |
| H(21B) | 2859     | 3408    | 7306    | 50 |
| H(21C) | 1865     | 3203    | 7476    | 50 |
| H(23)  | 4208     | 2869    | 6471    | 29 |
| H(24)  | 4029     | 2950    | 5350    | 30 |
| H(26)  | 2483     | 890     | 5280    | 30 |
| H(27)  | 2618     | 849     | 6406    | 29 |
| H(5)   | 1622(11) | 5411(9) | 4363(7) | 29 |
| H(28)  | 787      | 5802    | 6024    | 38 |
| H(29)  | 333      | 4725    | 6657    | 40 |
| H(30)  | 385      | 3383    | 6282    | 39 |
| H(32)  | 739      | 2411    | 5385    | 40 |
| H(33)  | 1199     | 2247    | 4378    | 40 |
| H(34)  | 1639     | 3381    | 3784    | 34 |
| H(38A) | 2436     | 6153    | 3512    | 30 |

|        |       |      |      |    |
|--------|-------|------|------|----|
| H(38B) | 1373  | 6291 | 3387 | 30 |
| H(39)  | 2542  | 5734 | 2466 | 27 |
| H(46)  | 1232  | 7039 | 2383 | 30 |
| H(47A) | 2384  | 8021 | 2445 | 36 |
| H(47B) | 2446  | 7482 | 3086 | 36 |
| H(48A) | 3590  | 7250 | 2091 | 50 |
| H(48B) | 3666  | 6746 | 2752 | 50 |
| H(48C) | 3883  | 7711 | 2756 | 50 |
| H(50)  | 2767  | 5968 | 1462 | 31 |
| H(51)  | 2730  | 6045 | 340  | 32 |
| H(53)  | 966   | 7946 | 327  | 38 |
| H(54)  | 971   | 7827 | 1441 | 37 |
| H(41A) | 383   | 4987 | 585  | 50 |
| H(41B) | -270  | 4211 | 624  | 50 |
| H(41C) | 788   | 4074 | 624  | 50 |
| H(42A) | 971   | 3319 | 1624 | 50 |
| H(42B) | -92   | 3338 | 1654 | 50 |
| H(42C) | 566   | 3662 | 2251 | 50 |
| H(44A) | -924  | 6162 | 1570 | 77 |
| H(44B) | -1014 | 5520 | 987  | 77 |
| H(44C) | -100  | 6022 | 1151 | 77 |
| H(45A) | -777  | 4235 | 2392 | 74 |
| H(45B) | -1374 | 4335 | 1717 | 74 |
| H(45C) | -1394 | 5033 | 2256 | 74 |
| H(41D) | 169   | 6080 | 1063 | 61 |
| H(41E) | -540  | 5499 | 655  | 61 |
| H(41F) | 496   | 5475 | 529  | 61 |

|        |       |      |      |    |
|--------|-------|------|------|----|
| H(42D) | 746   | 4075 | 708  | 62 |
| H(42E) | -223  | 3805 | 893  | 62 |
| H(42F) | 648   | 3647 | 1387 | 62 |
| H(44D) | -1652 | 5244 | 2043 | 89 |
| H(44E) | -1459 | 5228 | 1304 | 89 |
| H(44F) | -1048 | 5947 | 1767 | 89 |
| H(45D) | 424   | 4039 | 2491 | 70 |
| H(45E) | -371  | 3583 | 2061 | 70 |
| H(45F) | -581  | 4088 | 2685 | 70 |

---



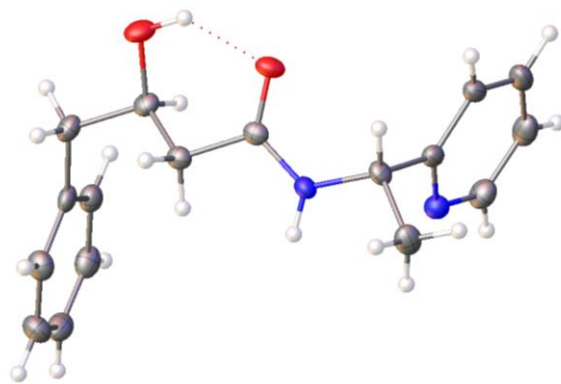

**Table S8.** Crystal data and structure refinement for **(±)-7a**.

|                        |                                                               |                  |
|------------------------|---------------------------------------------------------------|------------------|
| Report date            | 2019-05-21                                                    |                  |
| Identification code    | engle187                                                      |                  |
| Empirical formula      | C <sub>17</sub> H <sub>20</sub> N <sub>2</sub> O <sub>2</sub> |                  |
| Molecular formula      | C <sub>17</sub> H <sub>20</sub> N <sub>2</sub> O <sub>2</sub> |                  |
| Formula weight         | 284.35b                                                       |                  |
| Temperature            | 100.0 K                                                       |                  |
| Wavelength             | 1.54178 Å                                                     |                  |
| Crystal system         | Monoclinic                                                    |                  |
| Space group            | P 1 21/n 1                                                    |                  |
| Unit cell dimensions   | a = 17.9183(4) Å                                              | α = 90°.         |
|                        | b = 8.8857(2) Å                                               | β = 105.785(2)°. |
|                        | c = 19.8929(4) Å                                              | γ = 90°.         |
| Volume                 | 3047.84(12) Å <sup>3</sup>                                    |                  |
| Z                      | 8                                                             |                  |
| Density (calculated)   | 1.239 Mg/m <sup>3</sup>                                       |                  |
| Absorption coefficient | 0.655 mm <sup>-1</sup>                                        |                  |
| F(000)                 | 1216                                                          |                  |
| Crystal size           | 0.2 x 0.025 x 0.01 mm <sup>3</sup>                            |                  |

|                                   |                                             |
|-----------------------------------|---------------------------------------------|
| Crystal color, habit              | clear colourless needle                     |
| Theta range for data collection   | 2.946 to 68.294°.                           |
| Index ranges                      | -21<=h<=21, -10<=k<=10, -23<=l<=23          |
| Reflections collected             | 31057                                       |
| Independent reflections           | 5568 [R(int) = 0.0642]                      |
| Completeness to theta = 67.679°   | 99.8 %                                      |
| Absorption correction             | Semi-empirical from equivalents             |
| Max. and min. transmission        | 0.7531 and 0.6540                           |
| Refinement method                 | Full-matrix least-squares on F <sup>2</sup> |
| Data / restraints / parameters    | 5568 / 2 / 391                              |
| Goodness-of-fit on F <sup>2</sup> | 1.017                                       |
| Final R indices [I>2sigma(I)]     | R1 = 0.0518, wR2 = 0.1234                   |
| R indices (all data)              | R1 = 0.0851, wR2 = 0.1418                   |
| Extinction coefficient            | n/a                                         |
| Largest diff. peak and hole       | 0.444 and -0.250 e.Å <sup>-3</sup>          |

**Table S9.** Atomic coordinates ( $\times 10^4$ ) and equivalent isotropic displacement parameters ( $\text{\AA}^2 \times 10^3$ ) for **(±)-7a**.  $U(\text{eq})$  is defined as one third of the trace of the orthogonalized  $U^{ij}$  tensor.

|       | x       | y       | z       | $U(\text{eq})$ |
|-------|---------|---------|---------|----------------|
| O(1)  | 6192(1) | 4113(2) | 1319(1) | 25(1)          |
| O(2)  | 6941(1) | 1596(2) | 1898(1) | 36(1)          |
| N(1)  | 4101(1) | 5992(2) | 1560(1) | 21(1)          |
| N(2)  | 5767(1) | 5745(2) | 1999(1) | 20(1)          |
| C(1)  | 3368(1) | 5524(3) | 1310(1) | 24(1)          |
| C(2)  | 3038(1) | 5184(3) | 618(1)  | 27(1)          |
| C(3)  | 3481(1) | 5356(2) | 156(1)  | 24(1)          |
| C(4)  | 4238(1) | 5862(2) | 400(1)  | 22(1)          |
| C(5)  | 4533(1) | 6155(2) | 1110(1) | 19(1)          |
| C(6)  | 5357(1) | 6703(2) | 1420(1) | 21(1)          |
| C(7)  | 5367(1) | 8317(2) | 1677(1) | 28(1)          |
| C(8)  | 6153(1) | 4515(2) | 1904(1) | 20(1)          |
| C(9)  | 6556(1) | 3639(2) | 2554(1) | 21(1)          |
| C(10) | 6553(1) | 1940(3) | 2412(1) | 24(1)          |
| C(11) | 6959(1) | 1079(3) | 3075(1) | 29(1)          |
| C(12) | 6543(1) | 1180(3) | 3636(1) | 24(1)          |
| C(13) | 5864(1) | 367(2)  | 3572(1) | 26(1)          |
| C(14) | 5479(1) | 419(3)  | 4084(1) | 28(1)          |
| C(15) | 5762(1) | 1288(3) | 4671(1) | 26(1)          |
| C(16) | 6425(1) | 2137(3) | 4740(1) | 28(1)          |
| C(17) | 6813(1) | 2087(3) | 4225(1) | 26(1)          |
| O(3)  | 3723(1) | 8410(2) | 3651(1) | 25(1)          |

|       |         |          |         |       |
|-------|---------|----------|---------|-------|
| O(4)  | 3151(1) | 11048(2) | 3055(1) | 28(1) |
| N(3)  | 5802(1) | 6317(2)  | 3508(1) | 23(1) |
| N(4)  | 4142(1) | 6713(2)  | 2992(1) | 20(1) |
| C(18) | 6537(1) | 6728(3)  | 3799(1) | 28(1) |
| C(19) | 6823(1) | 7064(3)  | 4499(1) | 31(1) |
| C(20) | 6334(1) | 6950(3)  | 4927(1) | 30(1) |
| C(21) | 5576(1) | 6502(2)  | 4636(1) | 24(1) |
| C(22) | 5331(1) | 6209(2)  | 3924(1) | 20(1) |
| C(23) | 4502(1) | 5724(2)  | 3578(1) | 20(1) |
| C(24) | 4477(1) | 4107(2)  | 3318(1) | 28(1) |
| C(25) | 3777(1) | 7980(2)  | 3075(1) | 19(1) |
| C(26) | 3406(1) | 8860(2)  | 2415(1) | 20(1) |
| C(27) | 3497(1) | 10560(2) | 2528(1) | 21(1) |
| C(28) | 3113(1) | 11442(2) | 1865(1) | 24(1) |
| C(29) | 3506(1) | 11279(2) | 1289(1) | 21(1) |
| C(30) | 3185(1) | 10444(3) | 692(1)  | 28(1) |
| C(31) | 3539(1) | 10352(3) | 158(1)  | 31(1) |
| C(32) | 4230(1) | 11099(3) | 213(1)  | 29(1) |
| C(33) | 4567(1) | 11921(3) | 802(1)  | 28(1) |
| C(34) | 4208(1) | 12013(2) | 1336(1) | 24(1) |

---

**Table S10.** Bond lengths [Å] and angles [°] for (**±**)-**7a**.

---

|            |          |           |          |
|------------|----------|-----------|----------|
| O(1)-C(8)  | 1.238(3) | N(1)-C(5) | 1.341(3) |
| O(2)-C(10) | 1.418(3) | N(2)-C(6) | 1.459(3) |
| N(1)-C(1)  | 1.338(3) | N(2)-C(8) | 1.335(3) |

|             |          |                 |            |
|-------------|----------|-----------------|------------|
| C(1)-C(2)   | 1.376(3) | C(23)-C(24)     | 1.524(3)   |
| C(2)-C(3)   | 1.376(3) | C(25)-C(26)     | 1.517(3)   |
| C(3)-C(4)   | 1.386(3) | C(26)-C(27)     | 1.530(3)   |
| C(4)-C(5)   | 1.391(3) | C(27)-C(28)     | 1.528(3)   |
| C(5)-C(6)   | 1.517(3) | C(28)-C(29)     | 1.506(3)   |
| C(6)-C(7)   | 1.521(3) | C(29)-C(30)     | 1.386(3)   |
| C(8)-C(9)   | 1.513(3) | C(29)-C(34)     | 1.398(3)   |
| C(9)-C(10)  | 1.535(3) | C(30)-C(31)     | 1.380(3)   |
| C(10)-C(11) | 1.527(3) | C(31)-C(32)     | 1.383(3)   |
| C(11)-C(12) | 1.504(3) | C(32)-C(33)     | 1.375(3)   |
| C(12)-C(13) | 1.391(3) | C(33)-C(34)     | 1.386(3)   |
| C(12)-C(17) | 1.396(3) | C(1)-N(1)-C(5)  | 118.19(18) |
| C(13)-C(14) | 1.379(3) | C(8)-N(2)-C(6)  | 122.36(17) |
| C(14)-C(15) | 1.377(3) | N(1)-C(1)-C(2)  | 123.4(2)   |
| C(15)-C(16) | 1.382(3) | C(3)-C(2)-C(1)  | 118.3(2)   |
| C(16)-C(17) | 1.388(3) | C(2)-C(3)-C(4)  | 119.3(2)   |
| O(3)-C(25)  | 1.236(2) | C(3)-C(4)-C(5)  | 118.82(19) |
| O(4)-C(27)  | 1.423(2) | N(1)-C(5)-C(4)  | 121.88(19) |
| N(3)-C(18)  | 1.337(3) | N(1)-C(5)-C(6)  | 115.90(18) |
| N(3)-C(22)  | 1.338(3) | C(4)-C(5)-C(6)  | 122.22(18) |
| N(4)-C(23)  | 1.461(3) | N(2)-C(6)-C(5)  | 111.08(17) |
| N(4)-C(25)  | 1.334(3) | N(2)-C(6)-C(7)  | 109.14(17) |
| C(18)-C(19) | 1.380(3) | C(5)-C(6)-C(7)  | 111.15(17) |
| C(19)-C(20) | 1.380(3) | O(1)-C(8)-N(2)  | 122.24(19) |
| C(20)-C(21) | 1.382(3) | O(1)-C(8)-C(9)  | 121.28(19) |
| C(21)-C(22) | 1.388(3) | N(2)-C(8)-C(9)  | 116.48(18) |
| C(22)-C(23) | 1.520(3) | C(8)-C(9)-C(10) | 111.85(17) |

|                   |            |                   |            |
|-------------------|------------|-------------------|------------|
| O(2)-C(10)-C(9)   | 111.48(18) | C(25)-C(26)-C(27) | 112.15(17) |
| O(2)-C(10)-C(11)  | 107.55(17) | O(4)-C(27)-C(26)  | 111.01(17) |
| C(11)-C(10)-C(9)  | 110.96(18) | O(4)-C(27)-C(28)  | 107.17(16) |
| C(12)-C(11)-C(10) | 113.22(17) | C(28)-C(27)-C(26) | 111.98(17) |
| C(13)-C(12)-C(11) | 119.9(2)   | C(29)-C(28)-C(27) | 114.43(16) |
| C(13)-C(12)-C(17) | 118.1(2)   | C(30)-C(29)-C(28) | 122.22(19) |
| C(17)-C(12)-C(11) | 121.9(2)   | C(30)-C(29)-C(34) | 117.6(2)   |
| C(14)-C(13)-C(12) | 121.1(2)   | C(34)-C(29)-C(28) | 120.2(2)   |
| C(15)-C(14)-C(13) | 120.2(2)   | C(31)-C(30)-C(29) | 121.4(2)   |
| C(14)-C(15)-C(16) | 119.9(2)   | C(30)-C(31)-C(32) | 120.0(2)   |
| C(15)-C(16)-C(17) | 120.0(2)   | C(33)-C(32)-C(31) | 119.9(2)   |
| C(16)-C(17)-C(12) | 120.6(2)   | C(32)-C(33)-C(34) | 119.8(2)   |
| C(18)-N(3)-C(22)  | 117.64(19) | C(33)-C(34)-C(29) | 121.3(2)   |
| C(25)-N(4)-C(23)  | 122.33(17) |                   |            |
| N(3)-C(18)-C(19)  | 123.2(2)   |                   |            |
| C(20)-C(19)-C(18) | 118.8(2)   |                   |            |
| C(19)-C(20)-C(21) | 118.6(2)   |                   |            |
| C(20)-C(21)-C(22) | 118.9(2)   |                   |            |
| N(3)-C(22)-C(21)  | 122.73(19) |                   |            |
| N(3)-C(22)-C(23)  | 116.26(18) |                   |            |
| C(21)-C(22)-C(23) | 121.01(19) |                   |            |
| N(4)-C(23)-C(22)  | 110.91(16) |                   |            |
| N(4)-C(23)-C(24)  | 109.32(17) |                   |            |
| C(22)-C(23)-C(24) | 110.89(17) |                   |            |
| O(3)-C(25)-N(4)   | 122.64(19) |                   |            |
| O(3)-C(25)-C(26)  | 121.11(18) |                   |            |
| N(4)-C(25)-C(26)  | 116.23(18) |                   |            |

---

Symmetry transformations used to generate equivalent atoms:

**Table S11.** Anisotropic displacement parameters ( $\text{\AA}^2 \times 10^3$ ) for **(±)-7a**. The anisotropic displacement factor exponent takes the form:  $-2\pi^2 [ h^2 a^{*2} U^{11} + \dots + 2 h k a^* b^* U^{12} ]$

---

|       | $U^{11}$ | $U^{22}$ | $U^{33}$ | $U^{23}$ | $U^{13}$ | $U^{12}$ |
|-------|----------|----------|----------|----------|----------|----------|
| O(1)  | 32(1)    | 27(1)    | 19(1)    | 0(1)     | 11(1)    | 2(1)     |
| O(2)  | 44(1)    | 41(1)    | 31(1)    | 6(1)     | 22(1)    | 19(1)    |
| N(1)  | 24(1)    | 21(1)    | 17(1)    | 0(1)     | 6(1)     | 4(1)     |
| N(2)  | 22(1)    | 26(1)    | 14(1)    | 0(1)     | 6(1)     | 1(1)     |
| C(1)  | 22(1)    | 28(1)    | 23(1)    | 0(1)     | 9(1)     | 3(1)     |
| C(2)  | 24(1)    | 30(1)    | 26(1)    | 1(1)     | 4(1)     | 4(1)     |
| C(3)  | 30(1)    | 27(1)    | 14(1)    | 0(1)     | 1(1)     | 7(1)     |
| C(4)  | 28(1)    | 23(1)    | 16(1)    | 1(1)     | 8(1)     | 7(1)     |
| C(5)  | 25(1)    | 15(1)    | 19(1)    | 3(1)     | 7(1)     | 5(1)     |
| C(6)  | 26(1)    | 21(1)    | 18(1)    | 4(1)     | 9(1)     | 1(1)     |
| C(7)  | 33(1)    | 24(1)    | 26(1)    | 1(1)     | 6(1)     | -2(1)    |
| C(8)  | 18(1)    | 22(1)    | 20(1)    | 2(1)     | 7(1)     | -4(1)    |
| C(9)  | 19(1)    | 25(1)    | 19(1)    | 2(1)     | 6(1)     | -1(1)    |
| C(10) | 23(1)    | 30(1)    | 23(1)    | 4(1)     | 11(1)    | 4(1)     |
| C(11) | 29(1)    | 30(1)    | 31(1)    | 5(1)     | 12(1)    | 11(1)    |
| C(12) | 25(1)    | 26(1)    | 20(1)    | 7(1)     | 6(1)     | 10(1)    |
| C(13) | 35(1)    | 19(1)    | 22(1)    | 0(1)     | 5(1)     | 2(1)     |
| C(14) | 28(1)    | 26(1)    | 30(1)    | 9(1)     | 6(1)     | -1(1)    |
| C(15) | 29(1)    | 28(1)    | 22(1)    | 6(1)     | 11(1)    | 8(1)     |

---

|       |       |       |       |       |       |       |
|-------|-------|-------|-------|-------|-------|-------|
| C(16) | 34(1) | 28(1) | 18(1) | -3(1) | 3(1)  | 3(1)  |
| C(17) | 22(1) | 31(1) | 24(1) | 6(1)  | 2(1)  | 0(1)  |
| O(3)  | 32(1) | 28(1) | 17(1) | -4(1) | 10(1) | -2(1) |
| O(4)  | 34(1) | 28(1) | 28(1) | -2(1) | 19(1) | 5(1)  |
| N(3)  | 23(1) | 23(1) | 22(1) | -2(1) | 6(1)  | 1(1)  |
| N(4)  | 21(1) | 24(1) | 14(1) | 1(1)  | 4(1)  | 2(1)  |
| C(18) | 22(1) | 28(1) | 35(1) | -1(1) | 9(1)  | 2(1)  |
| C(19) | 23(1) | 26(1) | 39(1) | -5(1) | -2(1) | 1(1)  |
| C(20) | 34(1) | 28(1) | 22(1) | -5(1) | -4(1) | 7(1)  |
| C(21) | 30(1) | 21(1) | 18(1) | -1(1) | 5(1)  | 6(1)  |
| C(22) | 24(1) | 16(1) | 19(1) | 0(1)  | 5(1)  | 3(1)  |
| C(23) | 23(1) | 22(1) | 16(1) | 4(1)  | 5(1)  | 0(1)  |
| C(24) | 32(1) | 20(1) | 30(1) | 2(1)  | 3(1)  | -3(1) |
| C(25) | 17(1) | 22(1) | 19(1) | -2(1) | 6(1)  | -4(1) |
| C(26) | 18(1) | 22(1) | 20(1) | -2(1) | 5(1)  | -2(1) |
| C(27) | 19(1) | 24(1) | 24(1) | -1(1) | 9(1)  | 2(1)  |
| C(28) | 21(1) | 21(1) | 30(1) | 1(1)  | 8(1)  | 4(1)  |
| C(29) | 20(1) | 20(1) | 24(1) | 7(1)  | 6(1)  | 8(1)  |
| C(30) | 23(1) | 31(1) | 28(1) | 1(1)  | 3(1)  | -2(1) |
| C(31) | 34(1) | 36(1) | 22(1) | -2(1) | 3(1)  | 1(1)  |
| C(32) | 36(1) | 30(1) | 26(1) | 9(1)  | 15(1) | 9(1)  |
| C(33) | 26(1) | 25(1) | 34(1) | 10(1) | 11(1) | 2(1)  |
| C(34) | 24(1) | 21(1) | 26(1) | 2(1)  | 4(1)  | 2(1)  |

---



**Table S12.** Hydrogen coordinates ( $\times 10^4$ ) and isotropic displacement parameters ( $\text{\AA}^2 \times 10^3$ ) for ( $\pm$ )-**7a**.

|        | x        | y         | z        | U(eq) |
|--------|----------|-----------|----------|-------|
| H(2)   | 6756(14) | 2190(30)  | 1519(14) | 55    |
| H(2A)  | 5705(13) | 5920(30)  | 2421(9)  | 24    |
| H(1)   | 3059     | 5421      | 1627     | 29    |
| H(2B)  | 2517     | 4840      | 462      | 32    |
| H(3)   | 3269     | 5129      | -325     | 29    |
| H(4)   | 4550     | 6006      | 88       | 27    |
| H(6)   | 5637     | 6665      | 1049     | 25    |
| H(7A)  | 5133     | 8359      | 2068     | 42    |
| H(7B)  | 5070     | 8957      | 1296     | 42    |
| H(7C)  | 5903     | 8677      | 1831     | 42    |
| H(9A)  | 6292     | 3835      | 2923     | 25    |
| H(9B)  | 7099     | 3992      | 2727     | 25    |
| H(10)  | 6003     | 1587      | 2245     | 29    |
| H(11A) | 7003     | 7         | 2954     | 35    |
| H(11B) | 7491     | 1481      | 3259     | 35    |
| H(13)  | 5663     | -234      | 3168     | 31    |
| H(14)  | 5017     | -147      | 4032     | 34    |
| H(15)  | 5502     | 1305      | 5029     | 31    |
| H(16)  | 6615     | 2754      | 5140     | 33    |
| H(17)  | 7267     | 2676      | 4274     | 32    |
| H(4A)  | 3310(13) | 10420(30) | 3444(13) | 42    |
| H(4B)  | 4187(13) | 6470(30)  | 2575(9)  | 24    |

|        |      |       |      |    |
|--------|------|-------|------|----|
| H(18)  | 6879 | 6792  | 3509 | 34 |
| H(19)  | 7347 | 7369  | 4684 | 37 |
| H(20)  | 6516 | 7174  | 5411 | 36 |
| H(21)  | 5229 | 6398  | 4919 | 28 |
| H(23)  | 4198 | 5786  | 3930 | 24 |
| H(24A) | 3936 | 3790  | 3133 | 42 |
| H(24B) | 4737 | 3447  | 3705 | 42 |
| H(24C) | 4741 | 4043  | 2947 | 42 |
| H(26A) | 2847 | 8608  | 2255 | 24 |
| H(26B) | 3647 | 8556  | 2043 | 24 |
| H(27)  | 4062 | 10812 | 2677 | 26 |
| H(28A) | 2568 | 11103 | 1689 | 28 |
| H(28B) | 3105 | 12521 | 1987 | 28 |
| H(30)  | 2711 | 9924  | 649  | 34 |
| H(31)  | 3308 | 9775  | -247 | 38 |
| H(32)  | 4471 | 11043 | -157 | 35 |
| H(33)  | 5045 | 12426 | 844  | 34 |
| H(34)  | 4444 | 12585 | 1742 | 29 |

---

**Table S13.** Hydrogen bonds for ( $\pm$ )-**7a** [ $\text{\AA}$  and  $^\circ$ ].

---

| D-H...A           | d(D-H)    | d(H...A)  | d(D...A) | $\angle$ (DHA) |
|-------------------|-----------|-----------|----------|----------------|
| O(4)-H(4A)...O(3) | 0.93      | 1.94      | 2.699(2) | 137.7          |
| N(4)-H(4B)...N(1) | 0.883(16) | 2.028(17) | 2.903(2) | 170(2)         |

---

Symmetry transformations used to generate equivalent atoms:

## REFERENCES

- [1] Z. Liu, X. Li, T. Zeng, K. M. Engle, *ACS Catal.* **2019**, *9*, 3260–3265.
- [2] V. A. Van der Puyl, J. Derosa, K. M. Engle, *ACS Catal.* **2019**, *9*, 224–229.
- [3] Z. Liu, T. Zeng, K. S. Yang, K. M. Engle, *J. Am. Chem. Soc.* **2016**, *138*, 15122–15125.
- [4] M. Liu, P. Yang, M. K. Karunananda, Y. Wang, P. Liu, K. M. Engle, *J. Am. Chem. Soc.* **2018**, *140*, 5805–5813.
- [5] Z. Liu, H.-Q. Ni, T. Zeng, K. M. Engle, *J. Am. Chem. Soc.* **2018**, *140*, 3223–3227.
- [6] T. Zeng, Z. Liu, M. A. Schmidt, M. D. Eastgate, K. M. Engle, *Org. Lett.* **2018**, *20*, 3853–3857.
- [7] C. Chen, Y. Hao, T.-Y. Zhang, J.-L. Pan, J. Ding, H.-Y. Xiang, M. Wang, T.-M. Ding, A. Duan, S.-Y. Zhang, *Chem. Commun.* **2019**, *55*, 755–758.
- [8] H. Wang, Z. Bai, T. Jiao, Z. Deng, H. Tong, G. He, Q. Peng, G. Chen, *J. Am. Chem. Soc.* **2018**, *140*, 3542–3546.
- [9] S.-Z. Jiang, X.-Y. Zeng, X. Liang, T. Lei, K. Wei, Y.-R. Yang, *Angew. Chem.* **2016**, *128*, 4112–4116; *Angew. Chem. Int. Ed.* **2016**, *55*, 4044–4048.
- [10] X. Xiao, S. Antony, G. Kohlhagen, Y. Pommier, *Bioorg. Med. Chem.* **2004**, *12*, 5147–5160.
- [11] E. Van Heyningen, *J. Am. Chem. Soc.* **1955**, *77*, 4016–4019.
- [12] M. A. Schexnayder, P. S. Engel, *J. Am. Chem. Soc.* **1975**, *97*, 4825–4836.
- [13] X.-S. Ning, M.-M. Wang, J.-P. Qu, Y.-B. Kang, *J. Org. Chem.* **2018**, *83*, 13523–13529.
- [14] J. A. Gurak, Jr., K. S. Yang, Z. Liu, K. M. Engle, *J. Am. Chem. Soc.* **2016**, *138*, 5805–5808.
- [15] CCDC 1939487 ((±)-**4u**) and CCDC 1939488 ((±)-**7a**) contain the supplementary crystallographic data for this paper. These data can be obtained free of charge from The Cambridge Crystallographic Data Centre via [www.ccdc.cam.ac.uk/data\\_request/cif](http://www.ccdc.cam.ac.uk/data_request/cif).
- [16] H.-R. Tong, S. Zheng, X. Li, Z. Deng, H. Wang, G. He, Q. Peng, G. Chen, *ACS Catal.* **2018**, *8*, 11502–11512.
- [17] O. Verho, M. P. Lati, M. Oshmann, *J. Org. Chem.* **2018**, *83*, 4464–4476.
- [18] T. Deguchi, H.-L. Xin, H. Morimoto, T. Ohshima, *ACS Catal.* **2017**, *7*, 3157–3161.
- [19] G. L. Hoang, J. M. Takacs, *Chem. Sci.* **2017**, *8*, 4511–4516.
- [20] Z. Li, Z. Wang, L. Zhu, X. Tan, C. Li, *J. Am. Chem. Soc.* **2014**, *136*, 16439–16443.

# NMR Spectra and SFC Chromatograms

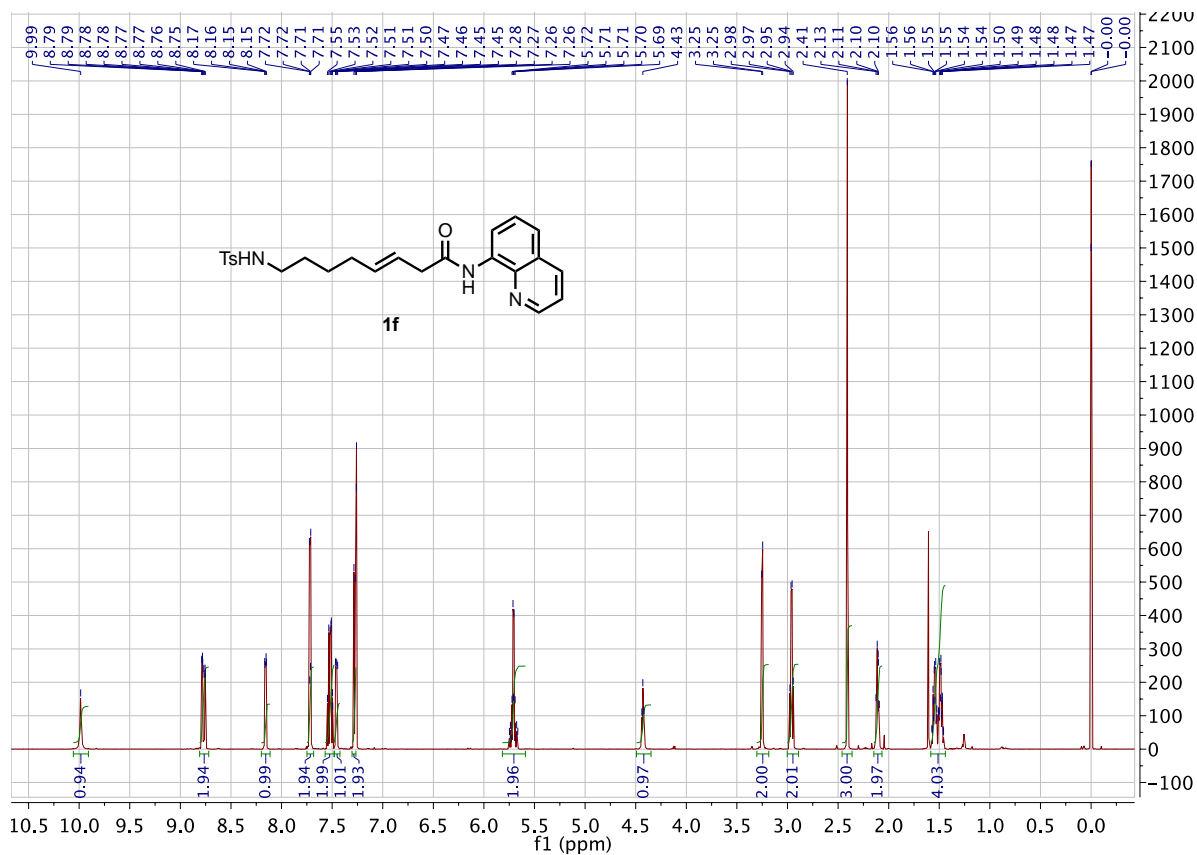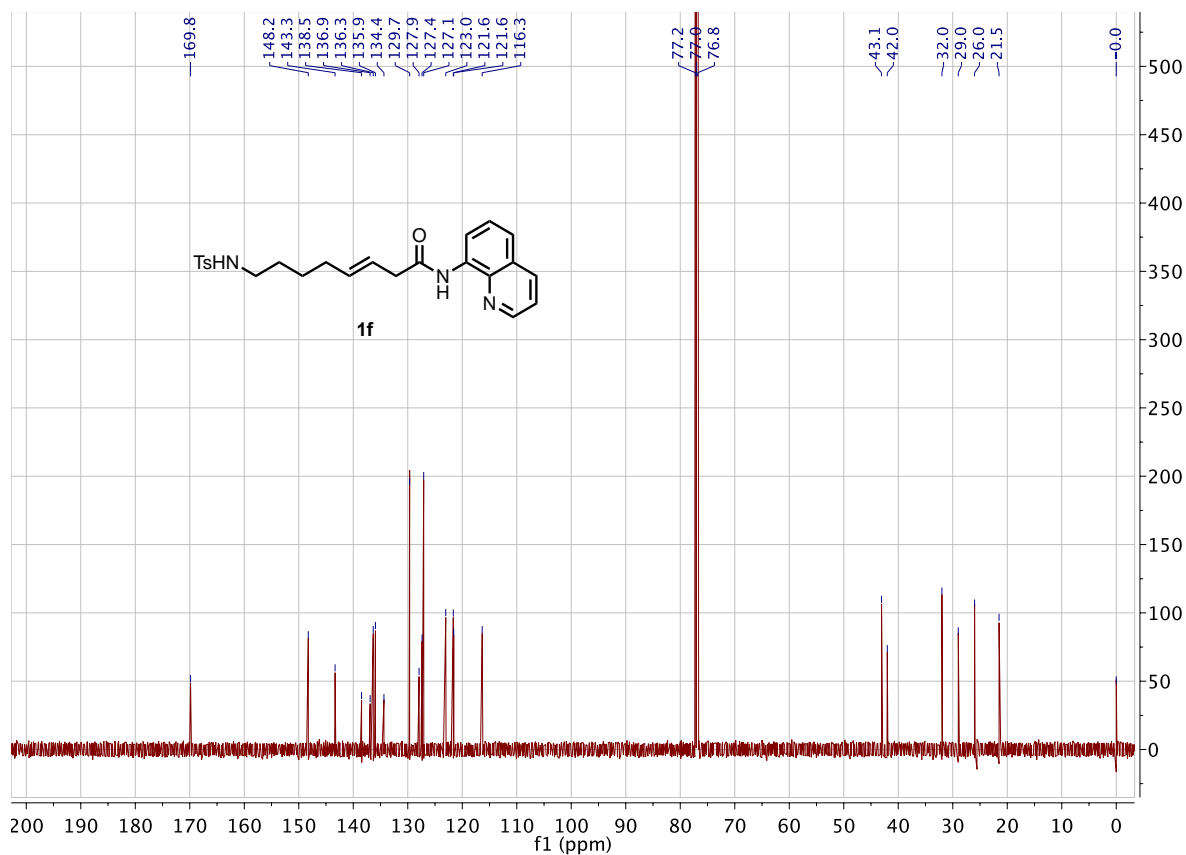

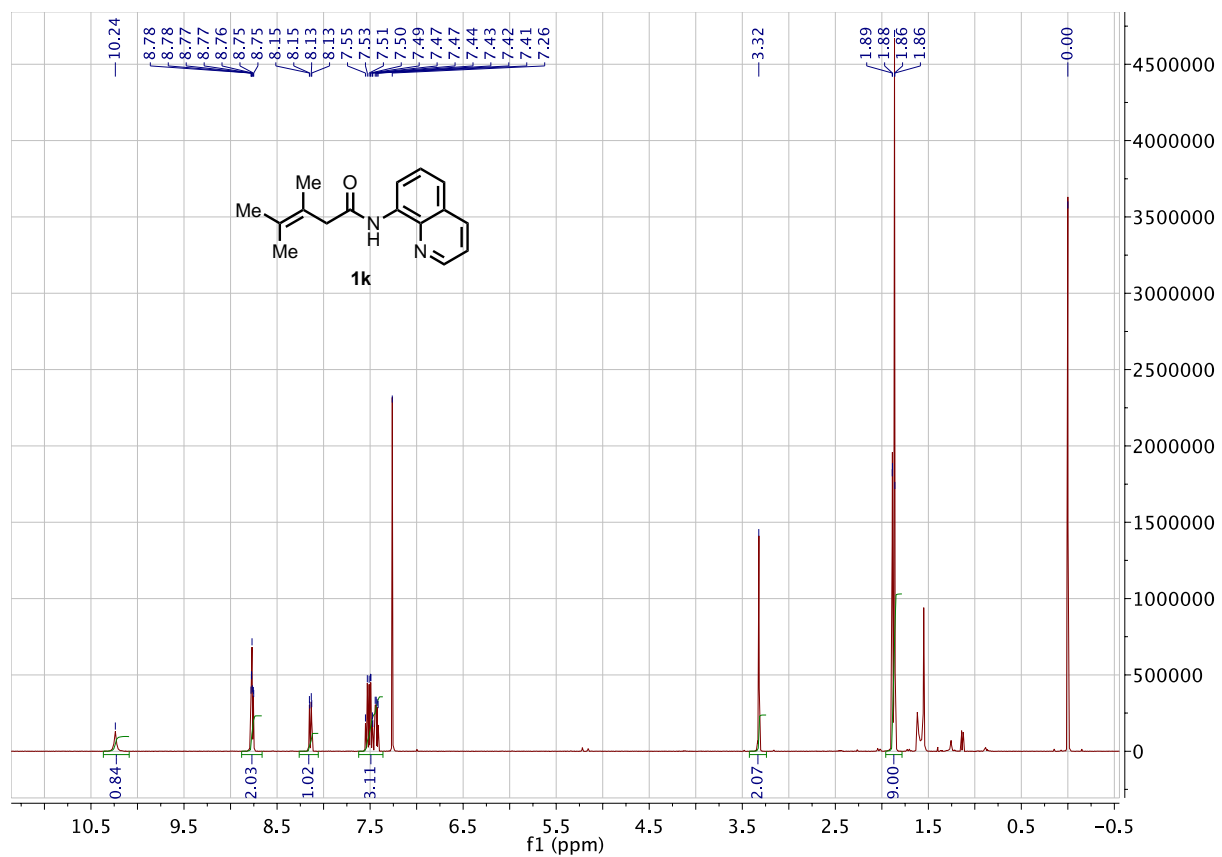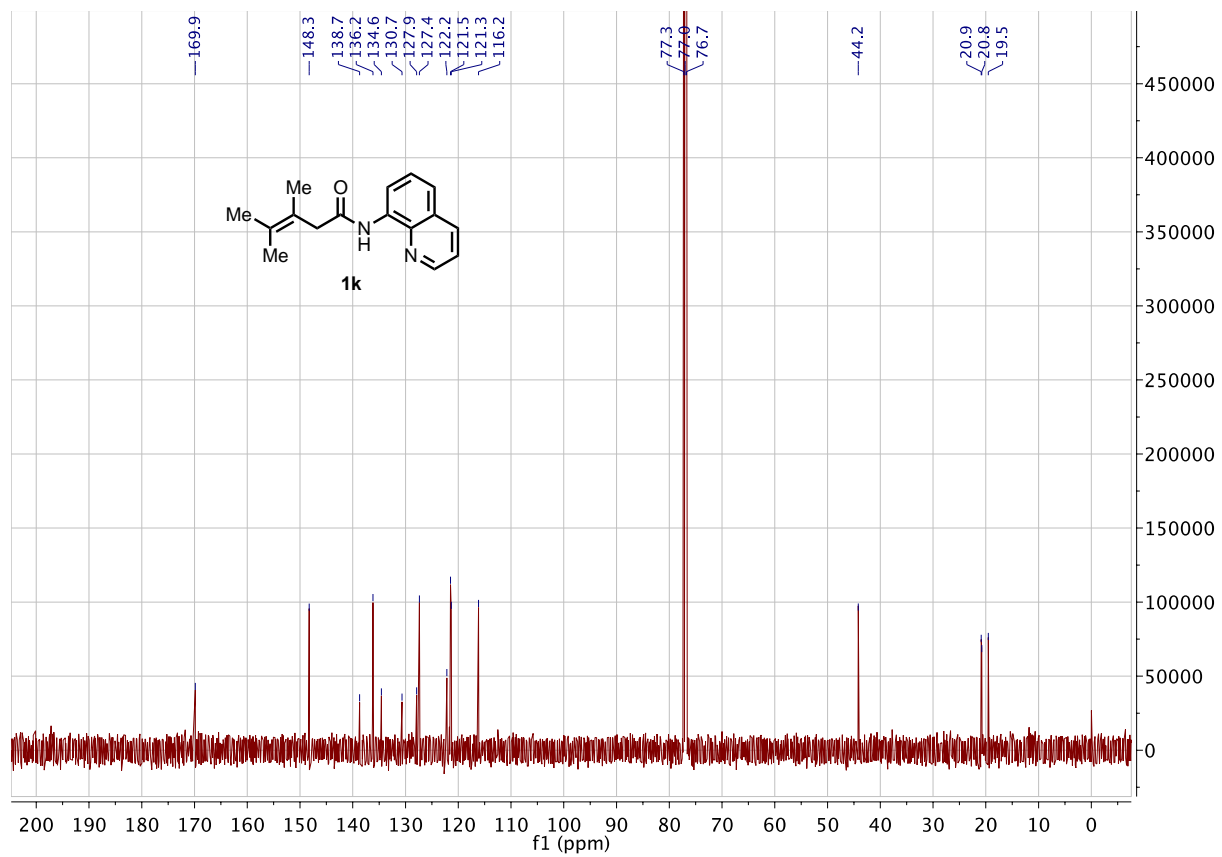

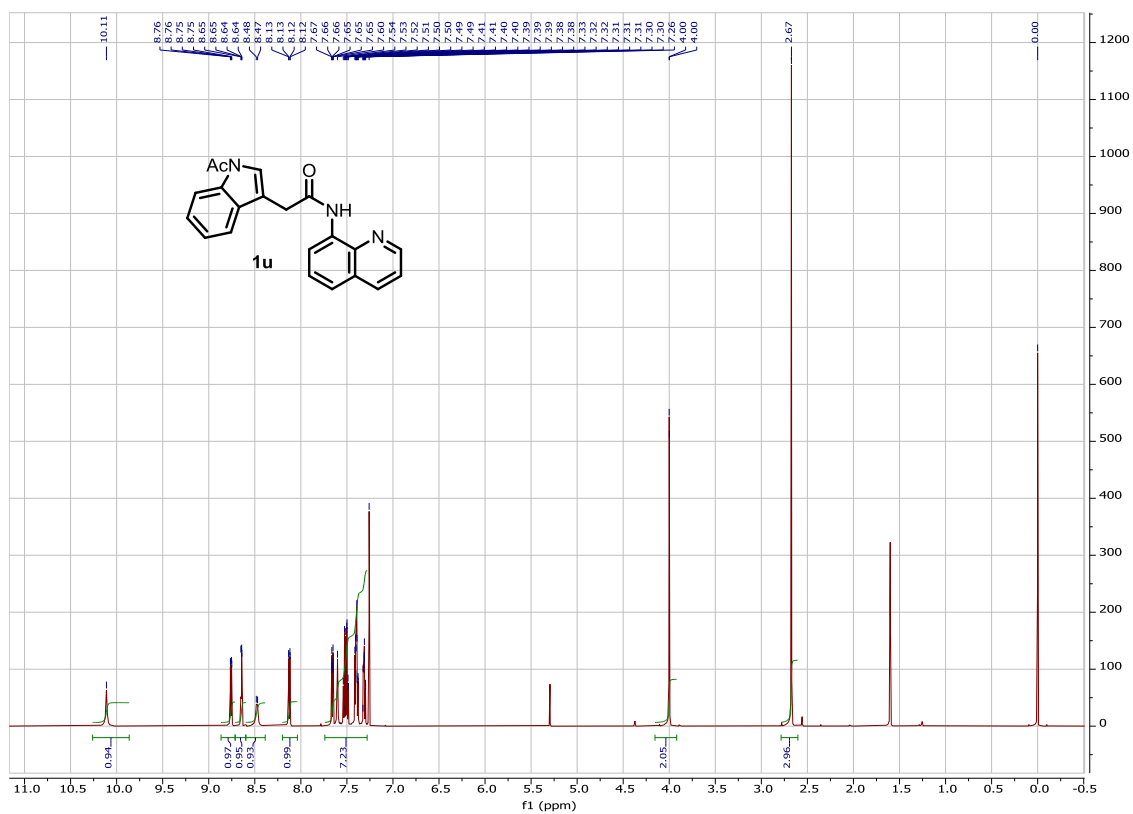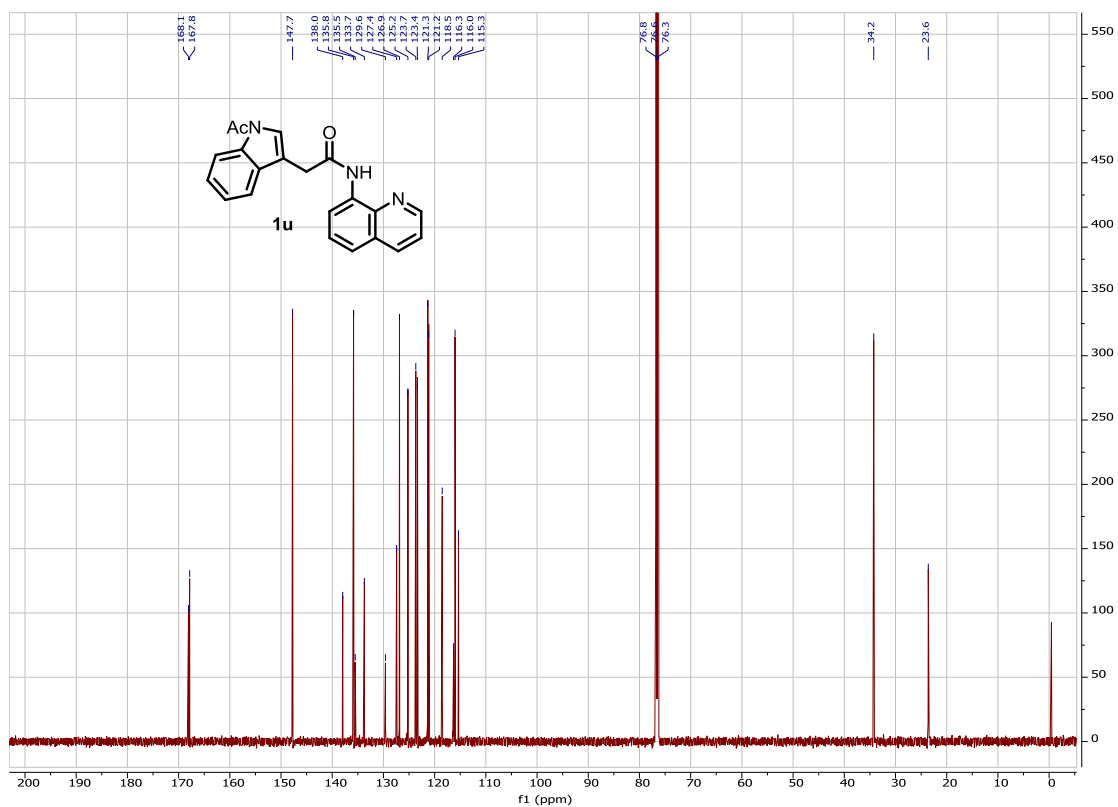

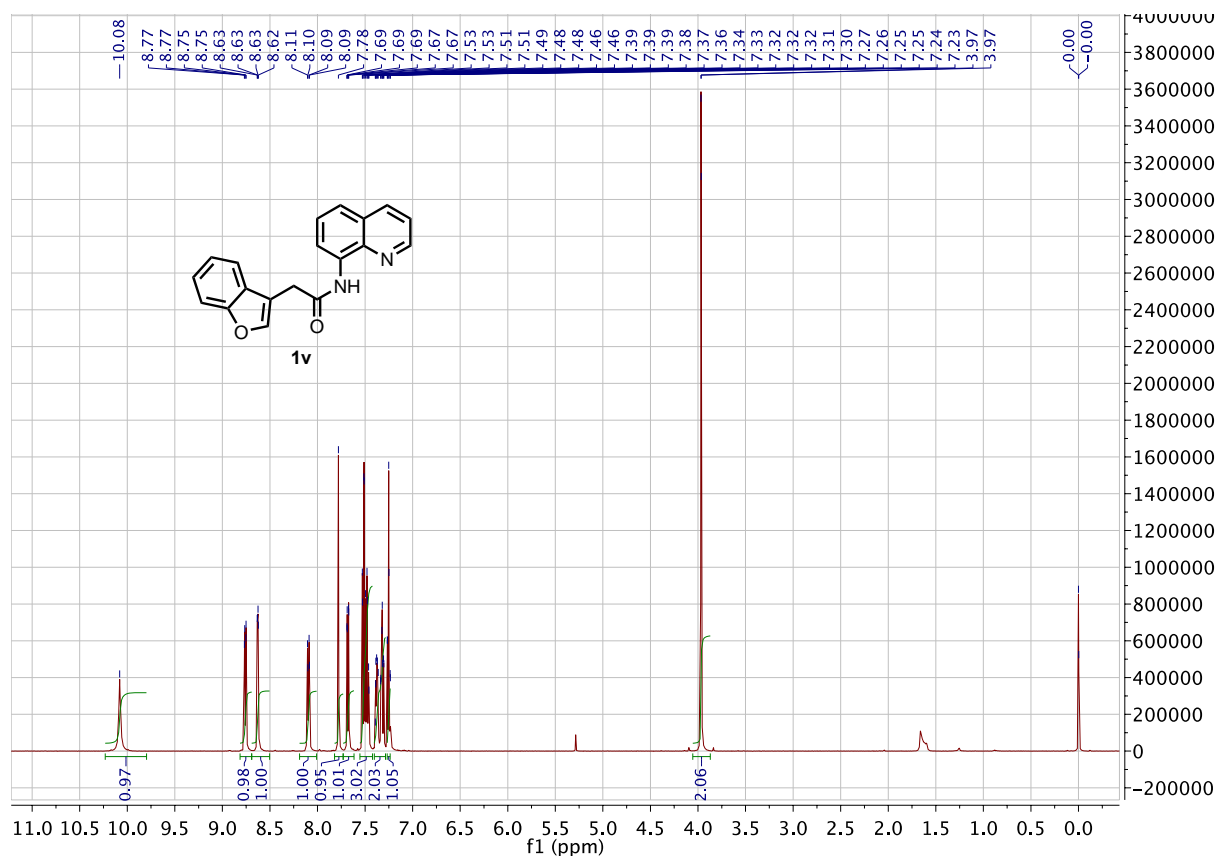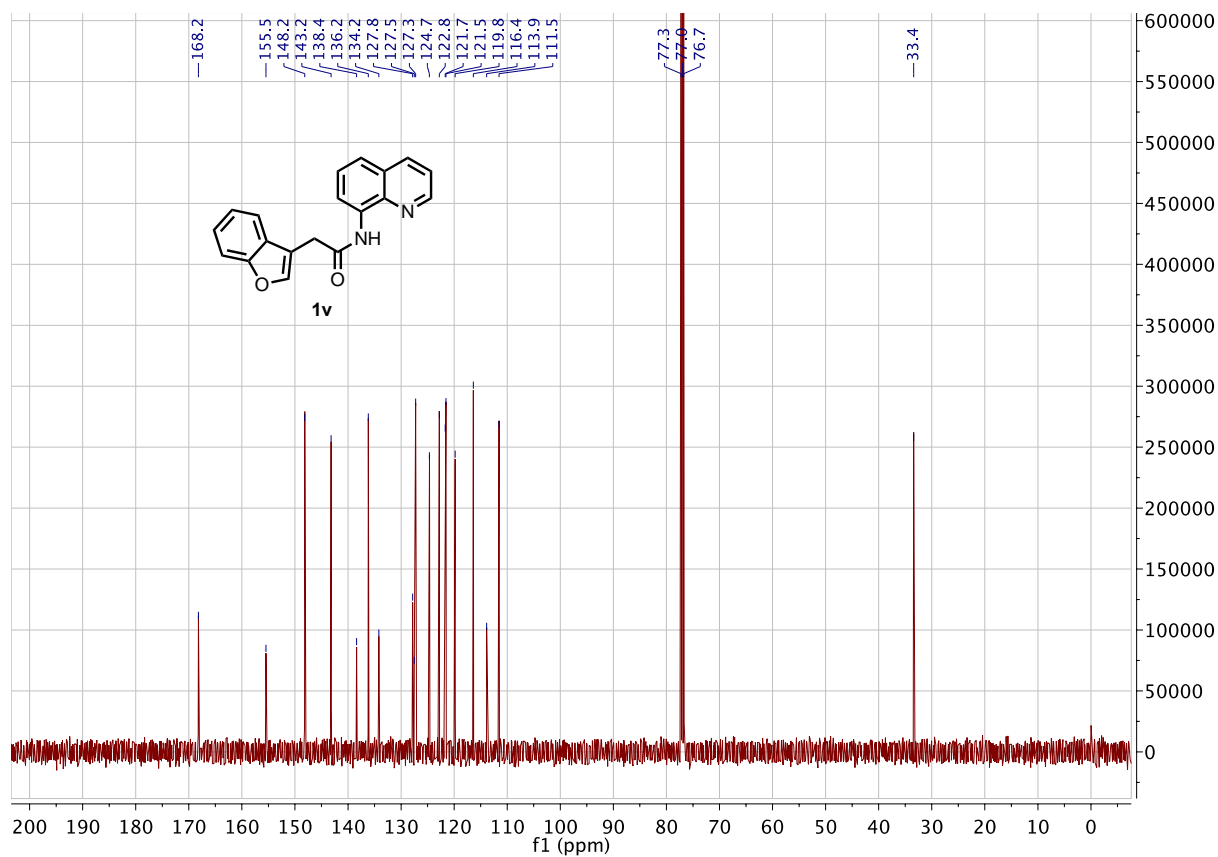

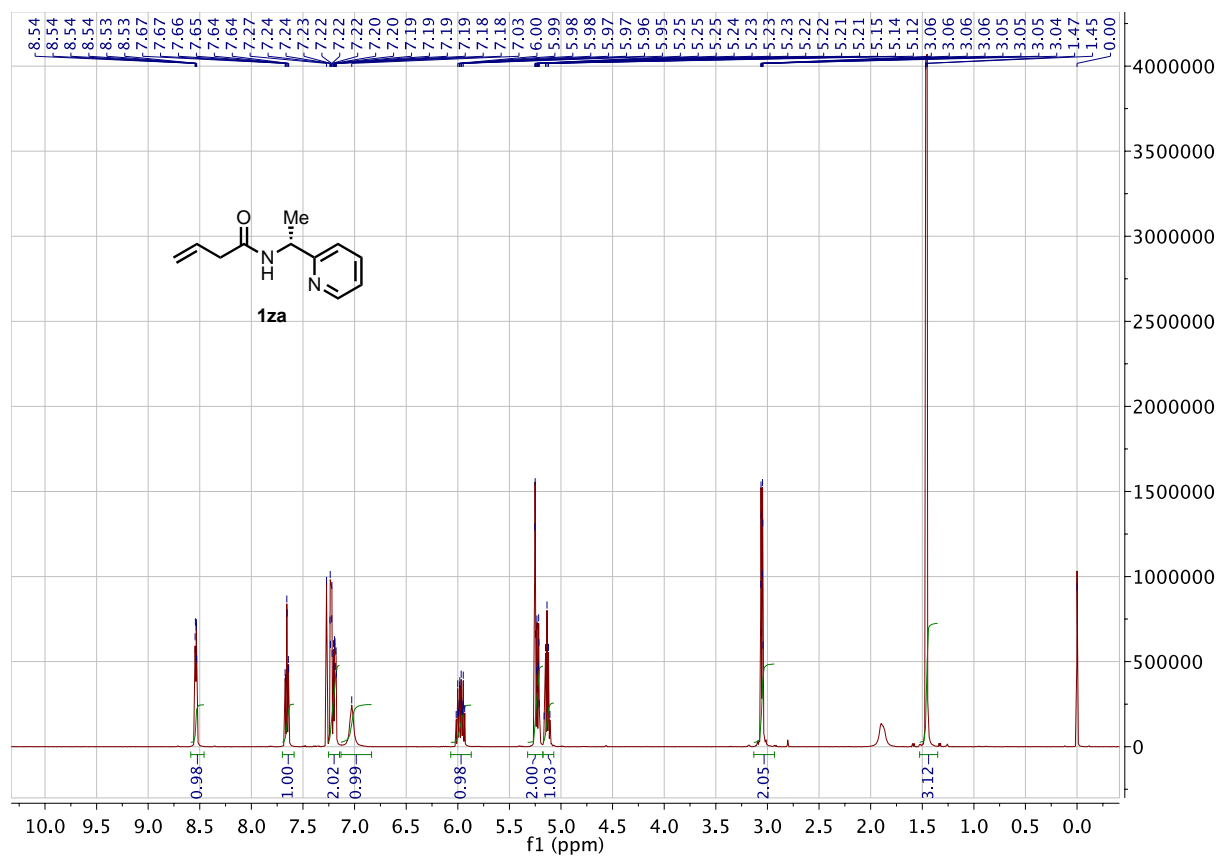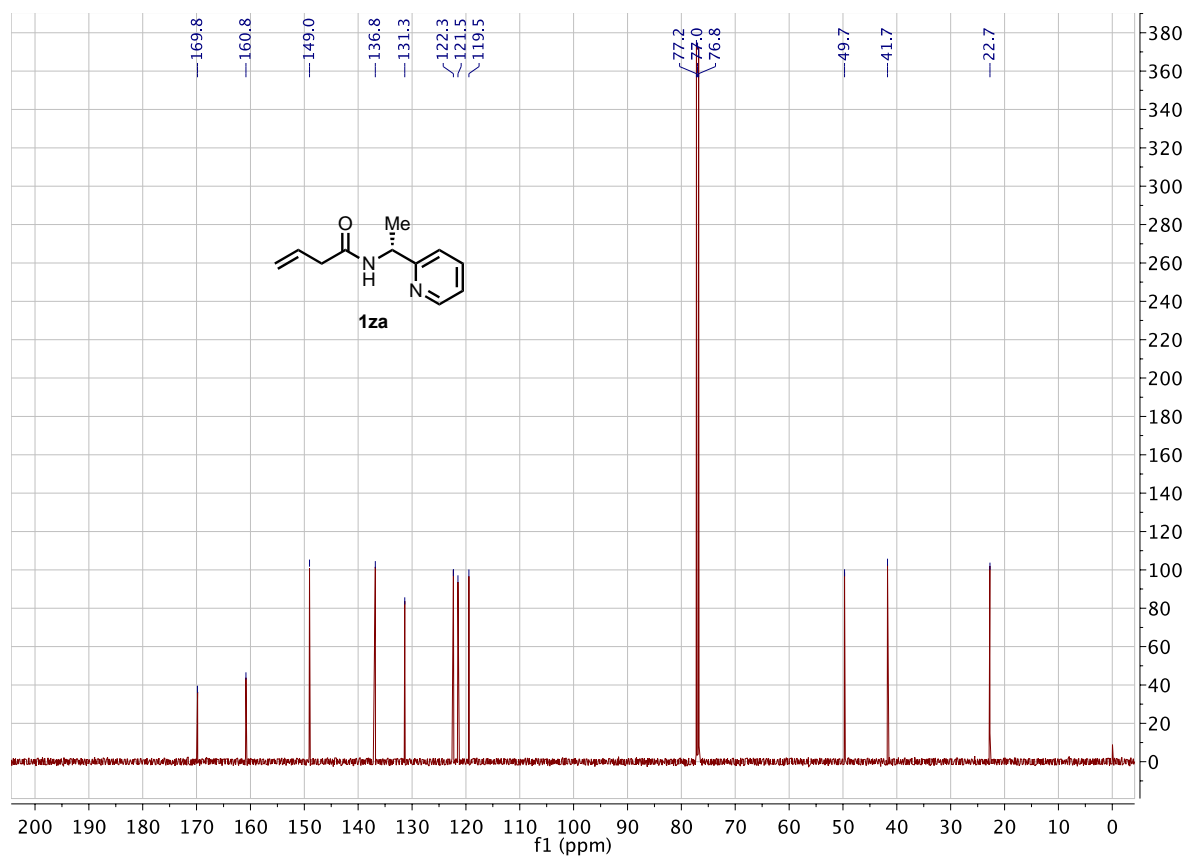



# HPLC Chromatograms of **1za**

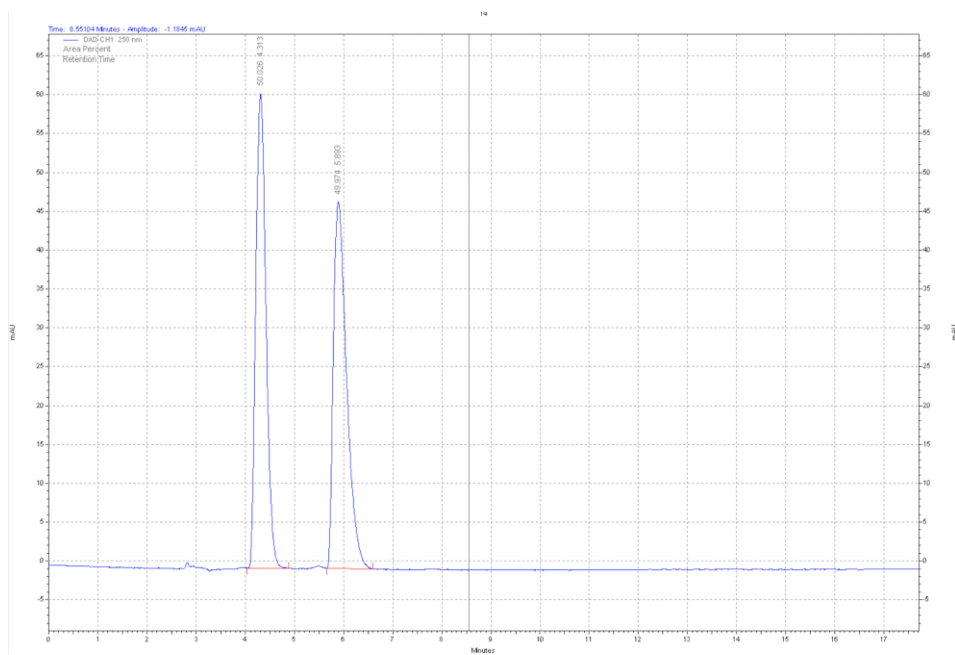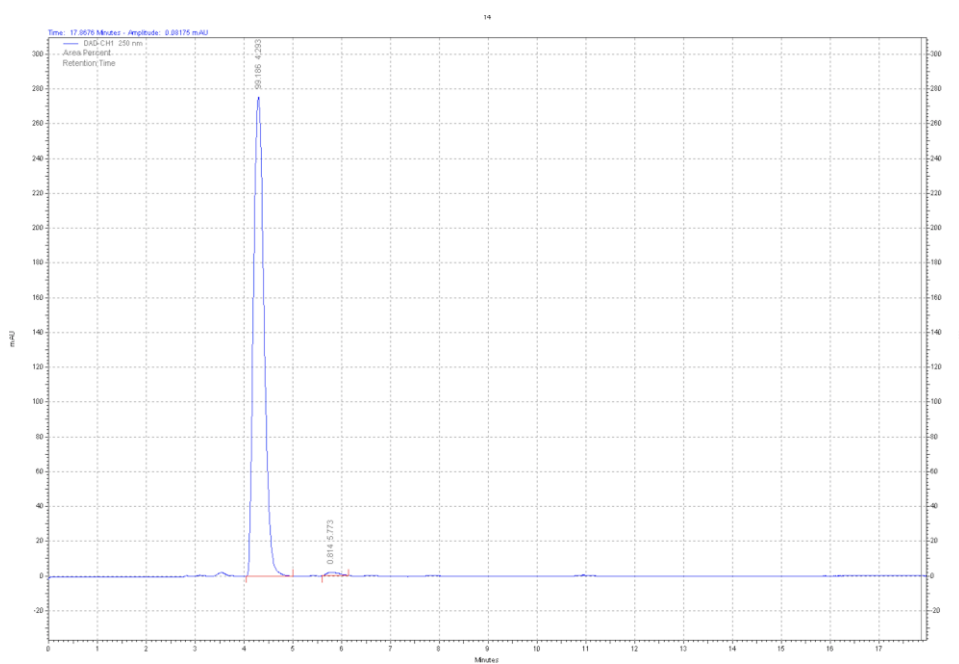

Area Summarized by Name

|   | SampleName       | ent   | ent   | ee    | Area1    | Area2   |
|---|------------------|-------|-------|-------|----------|---------|
| 1 | <b>1za-Rac</b>   | 50.03 | 49.97 | 0.06  | 3527704  | 3524038 |
| 2 | <b>1za-Enant</b> | 99.19 | 0.81  | 98.34 | 16498107 | 135394  |

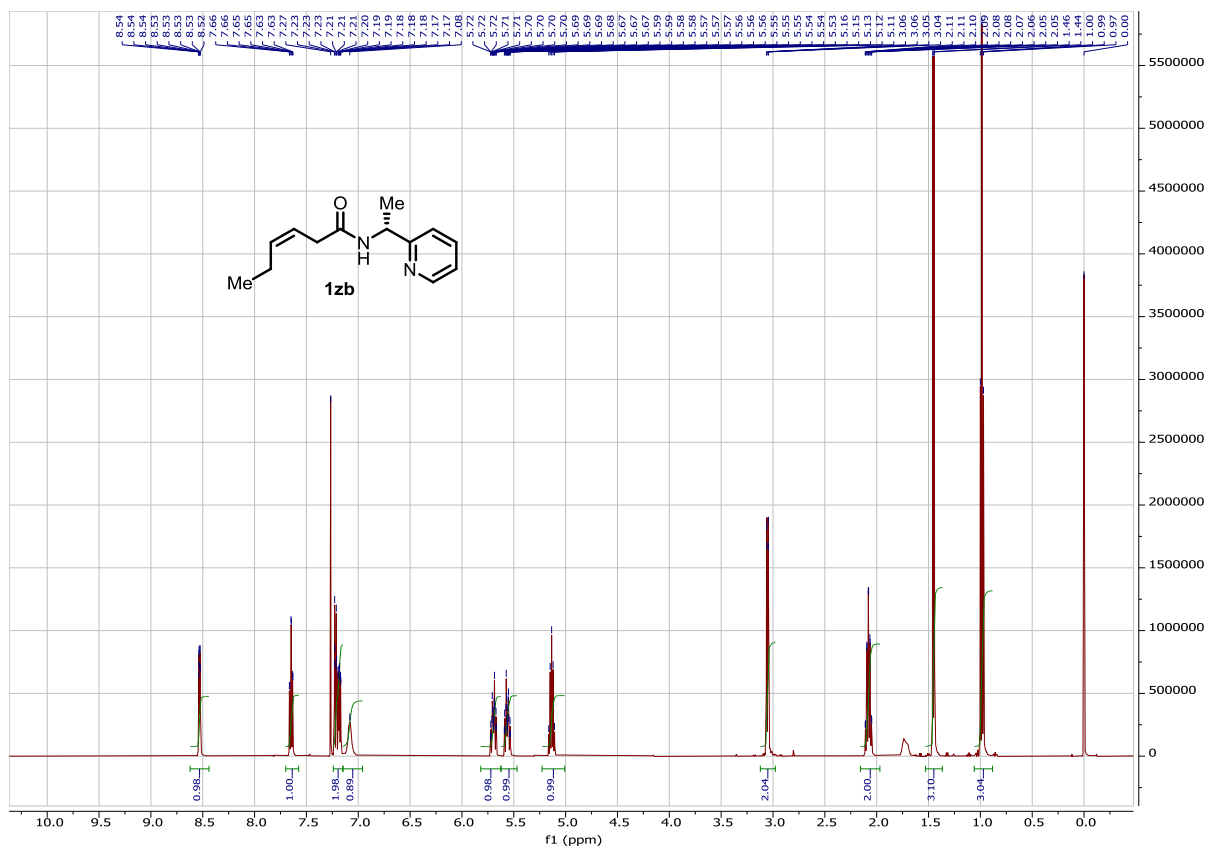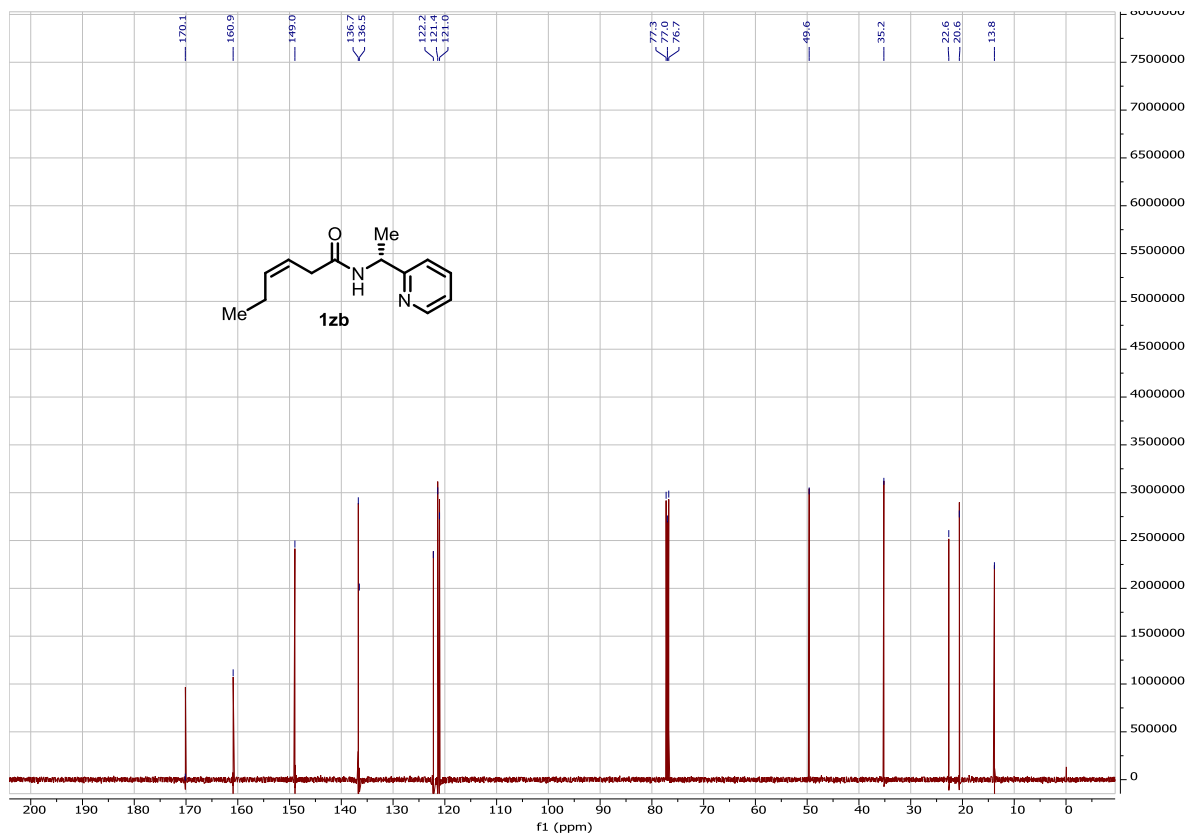

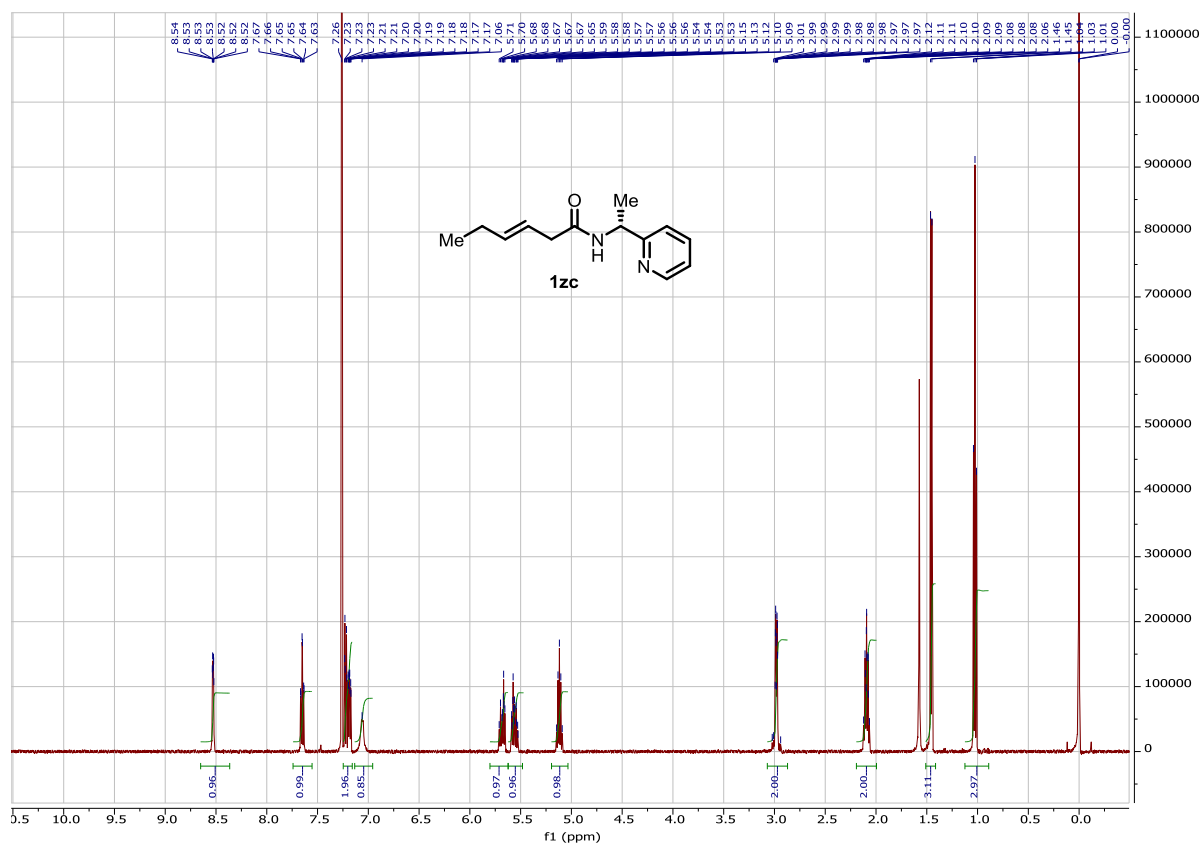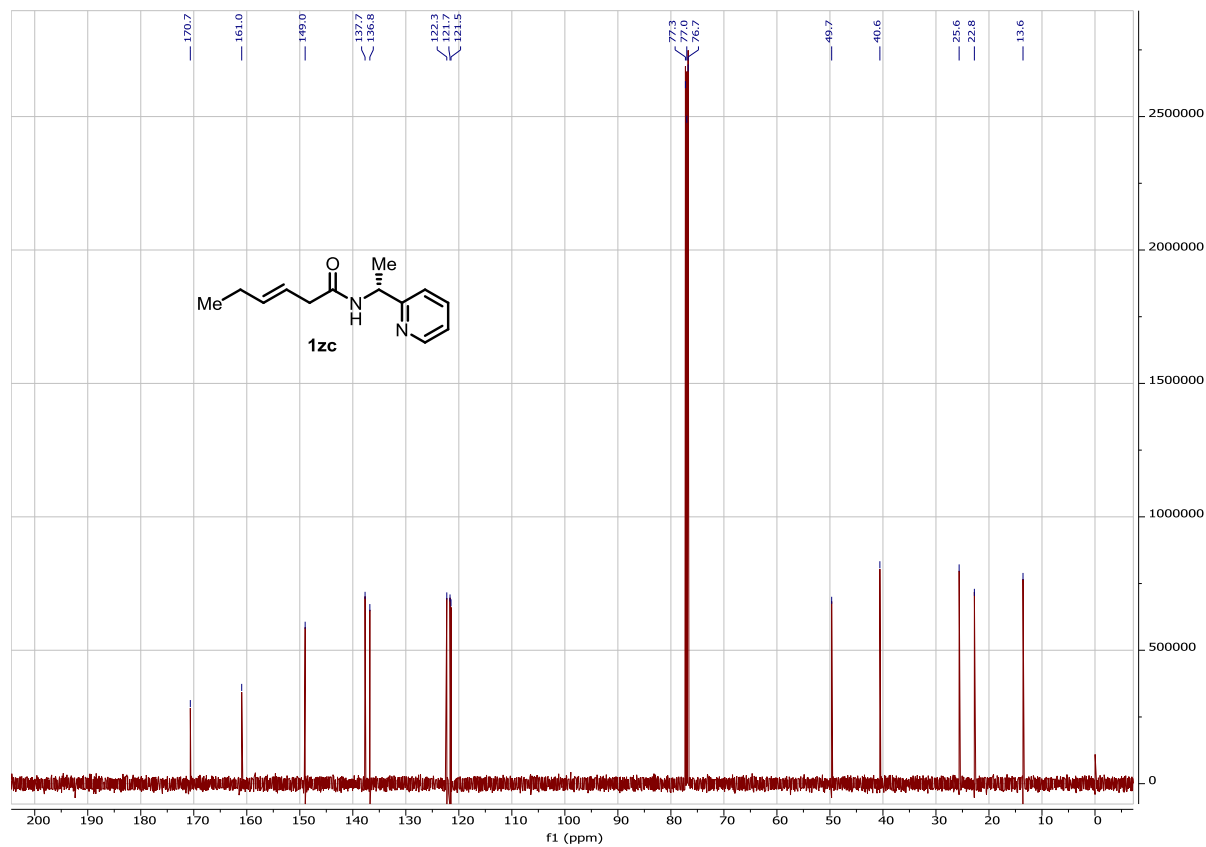

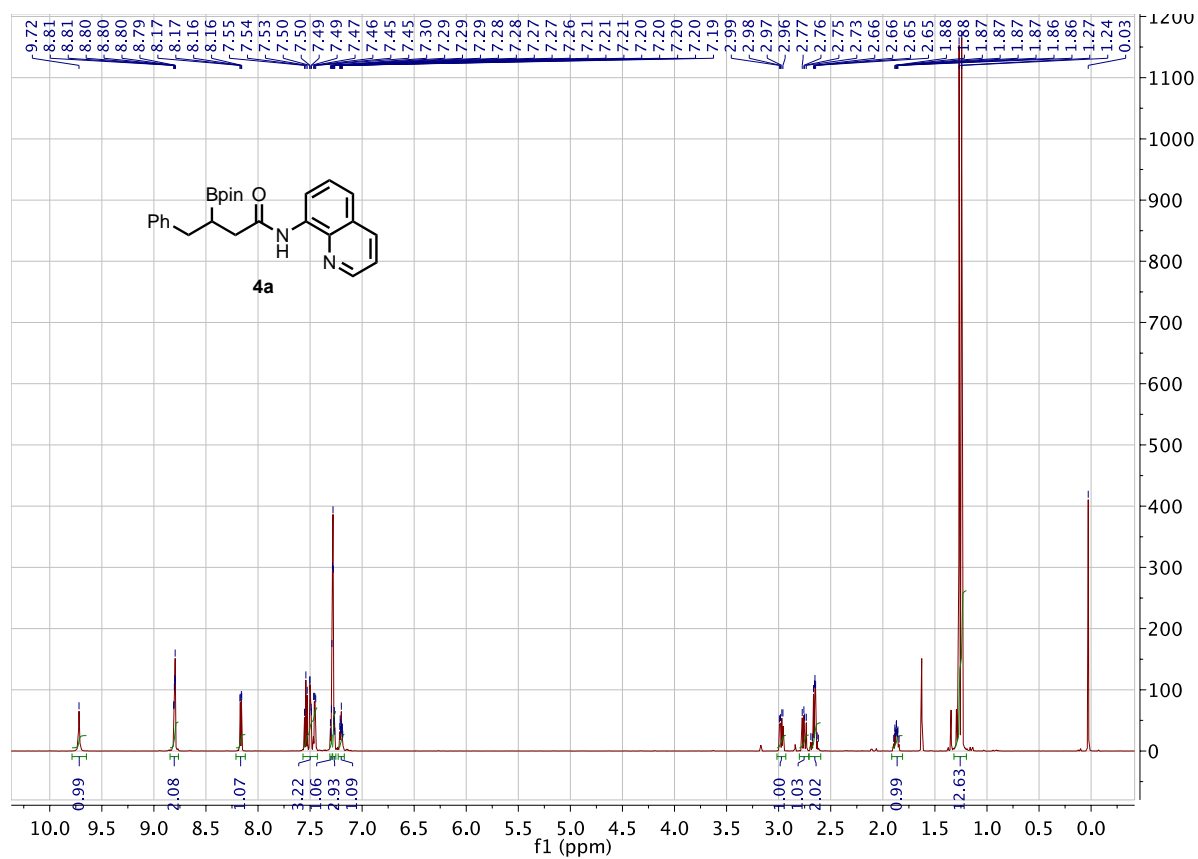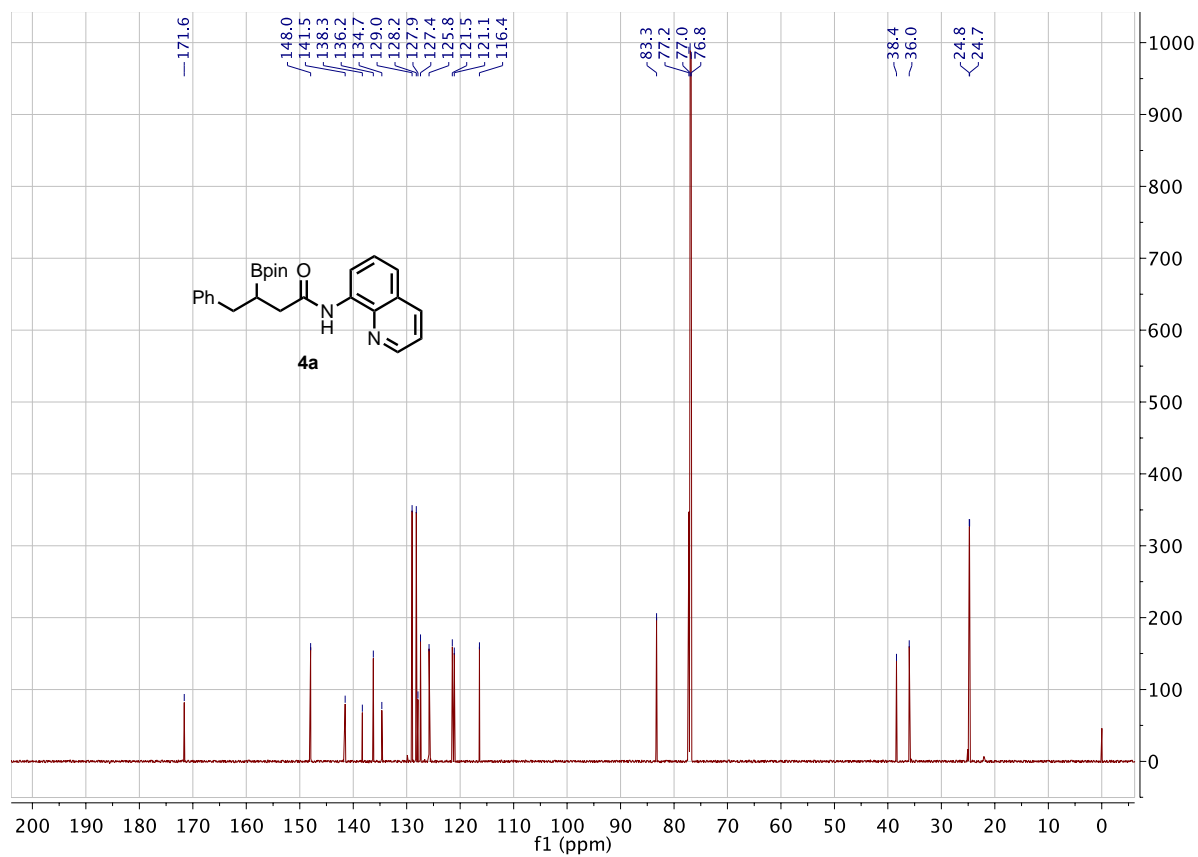

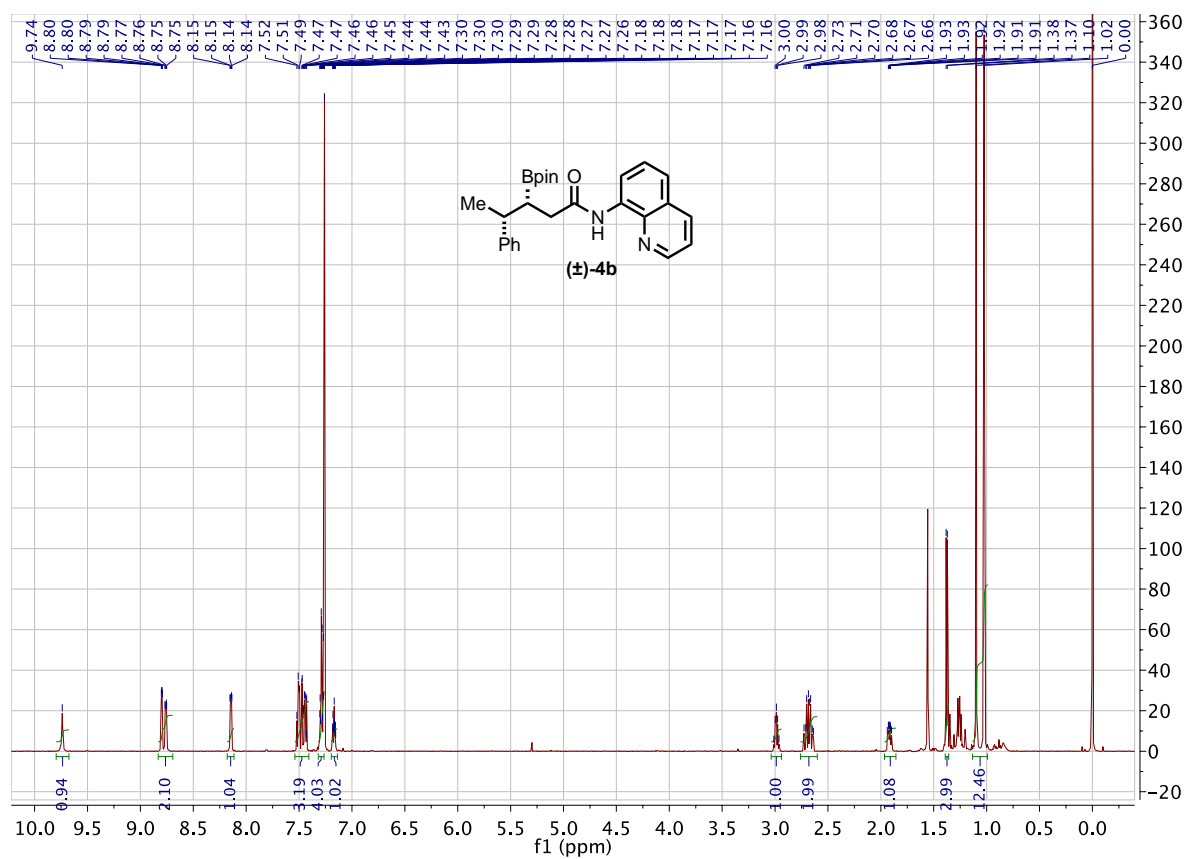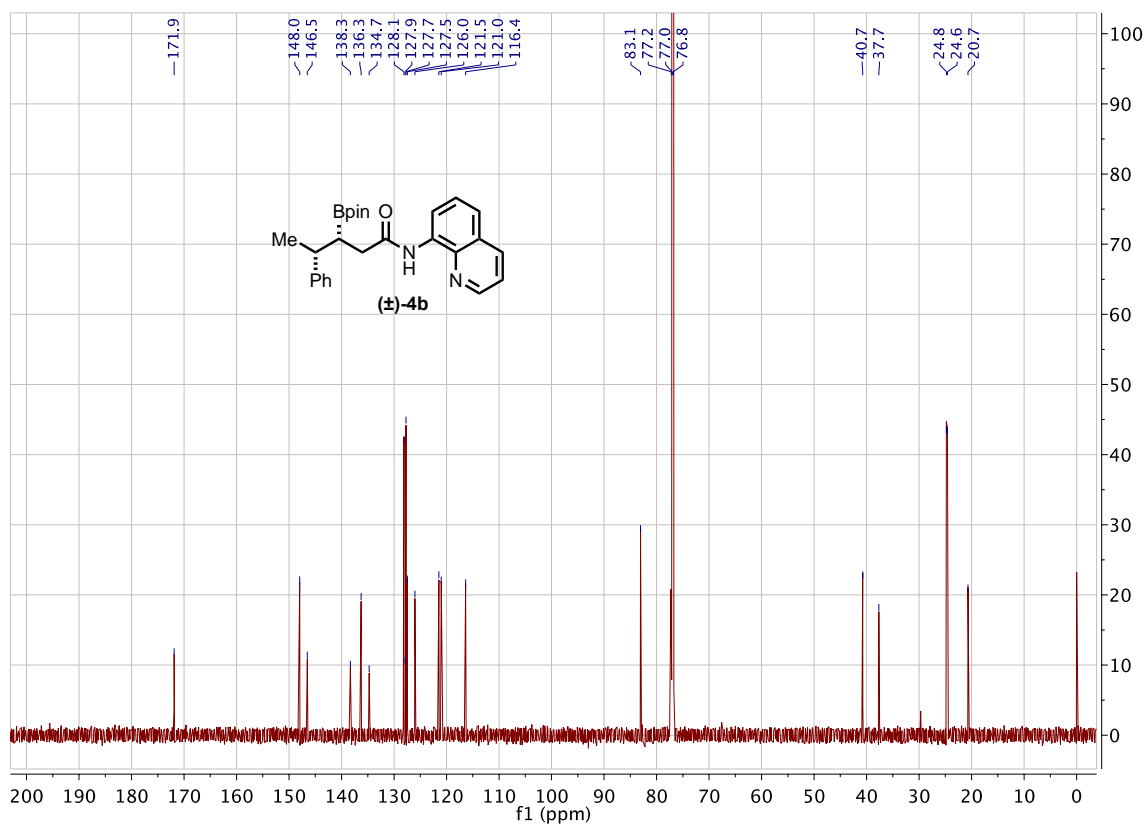

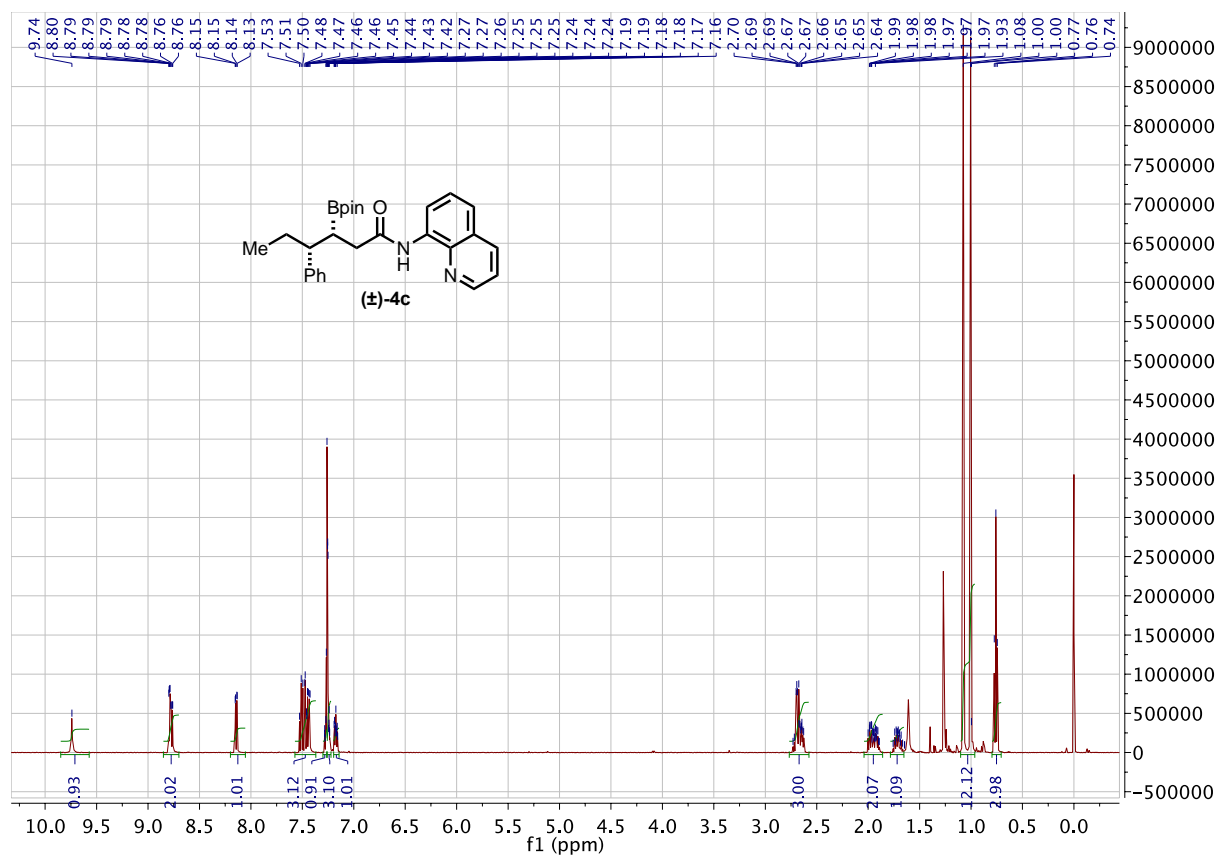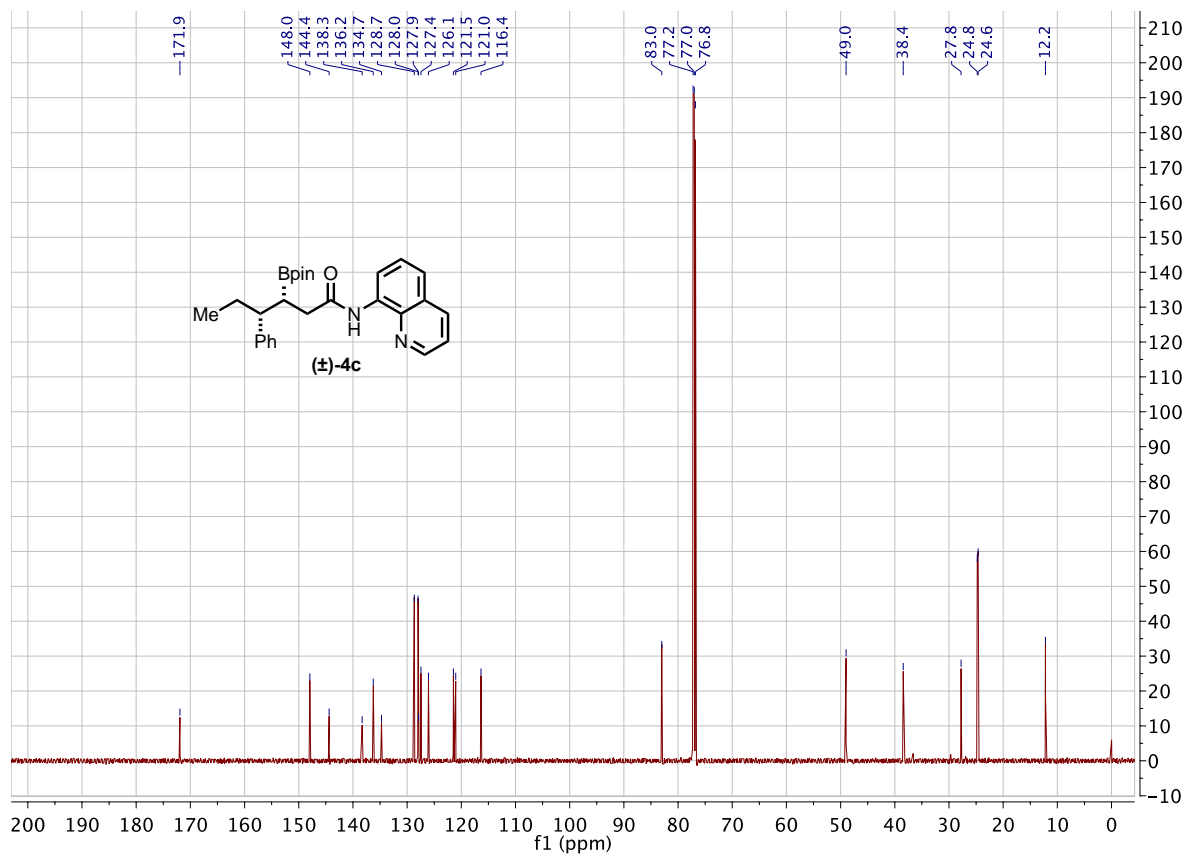

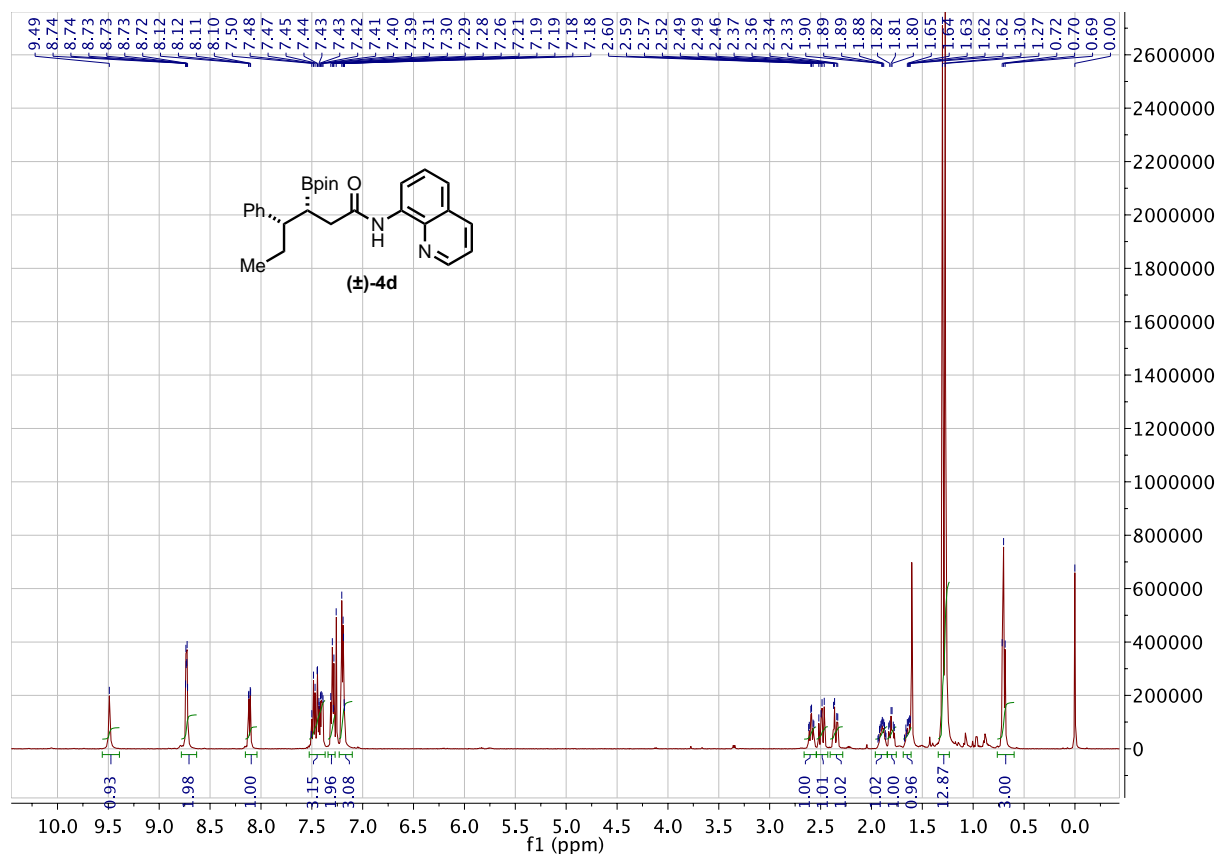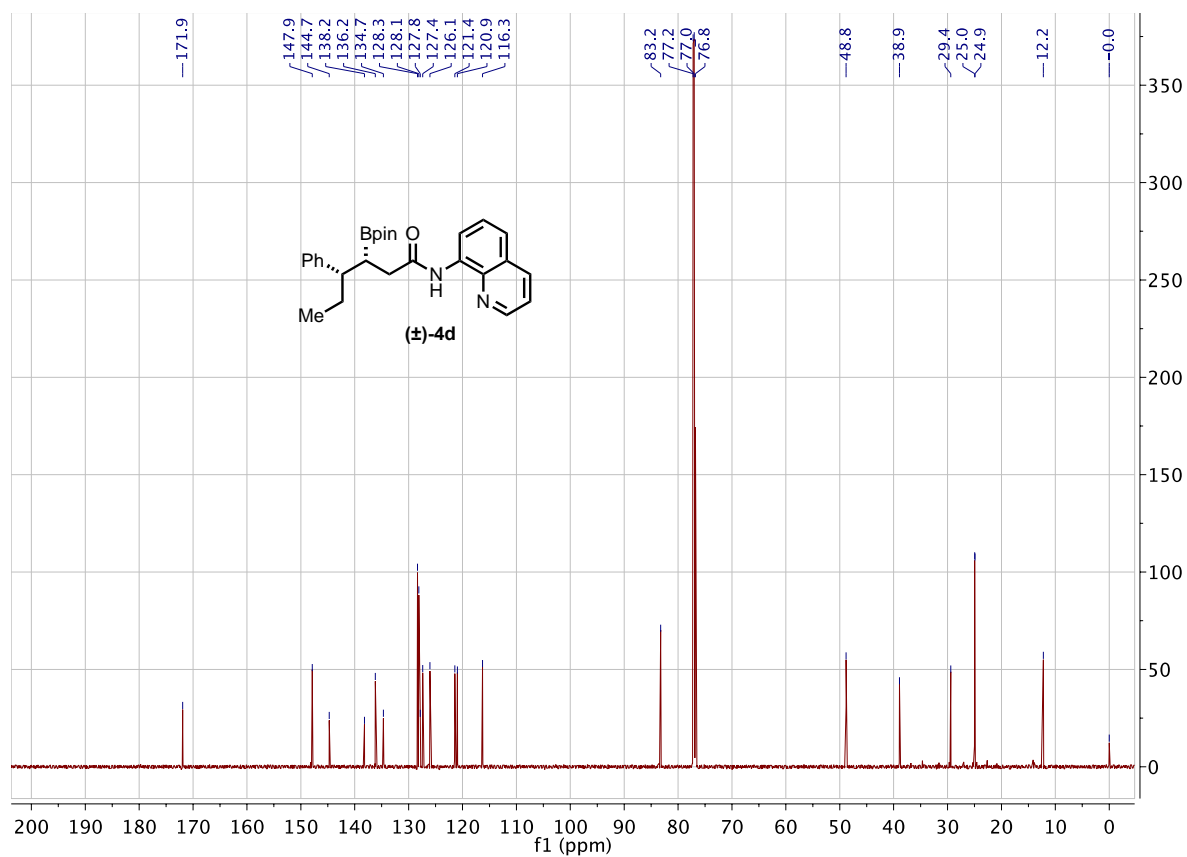

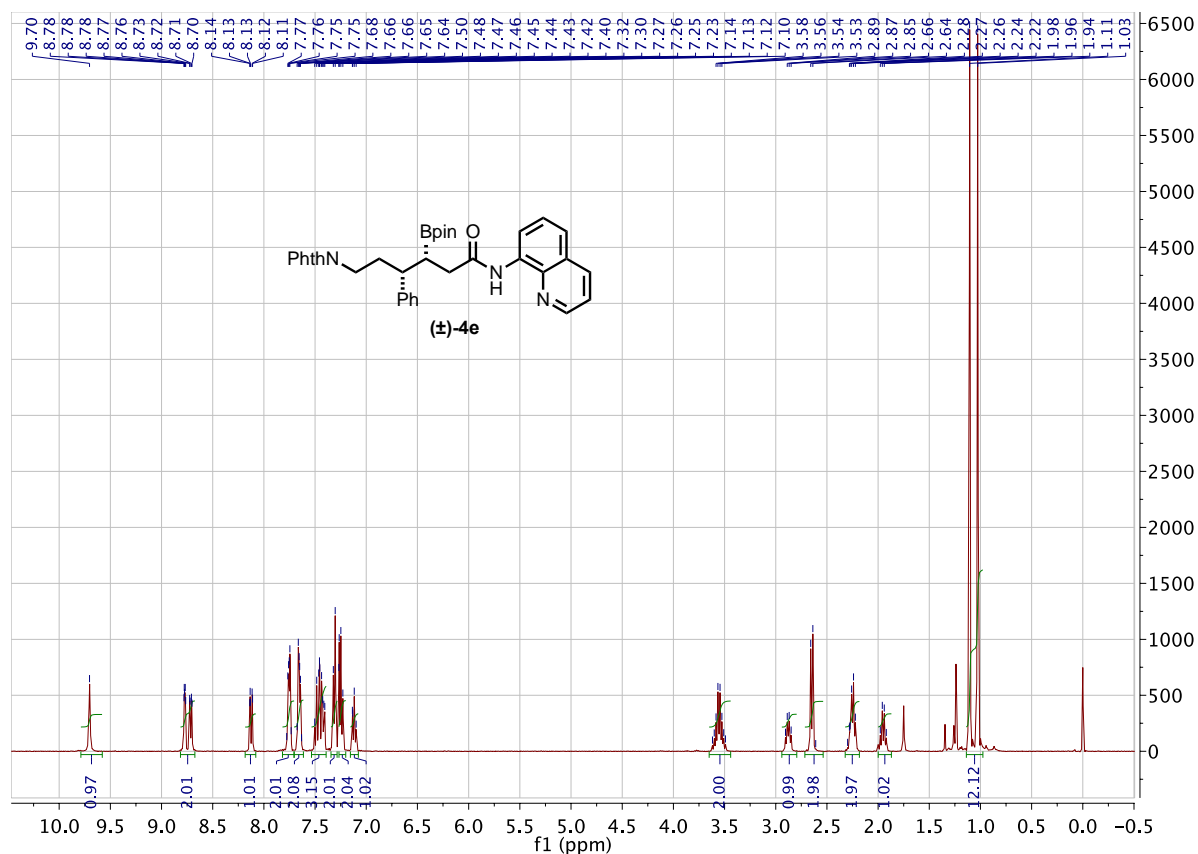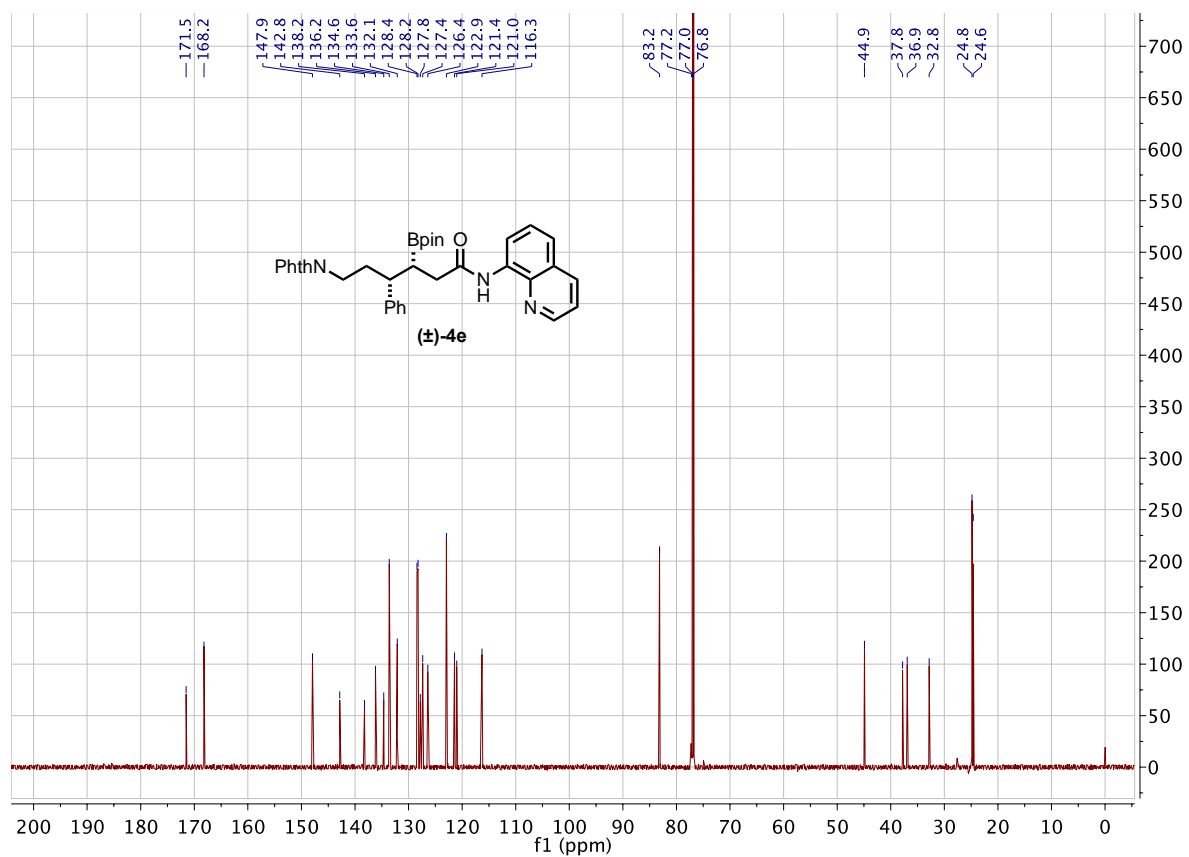



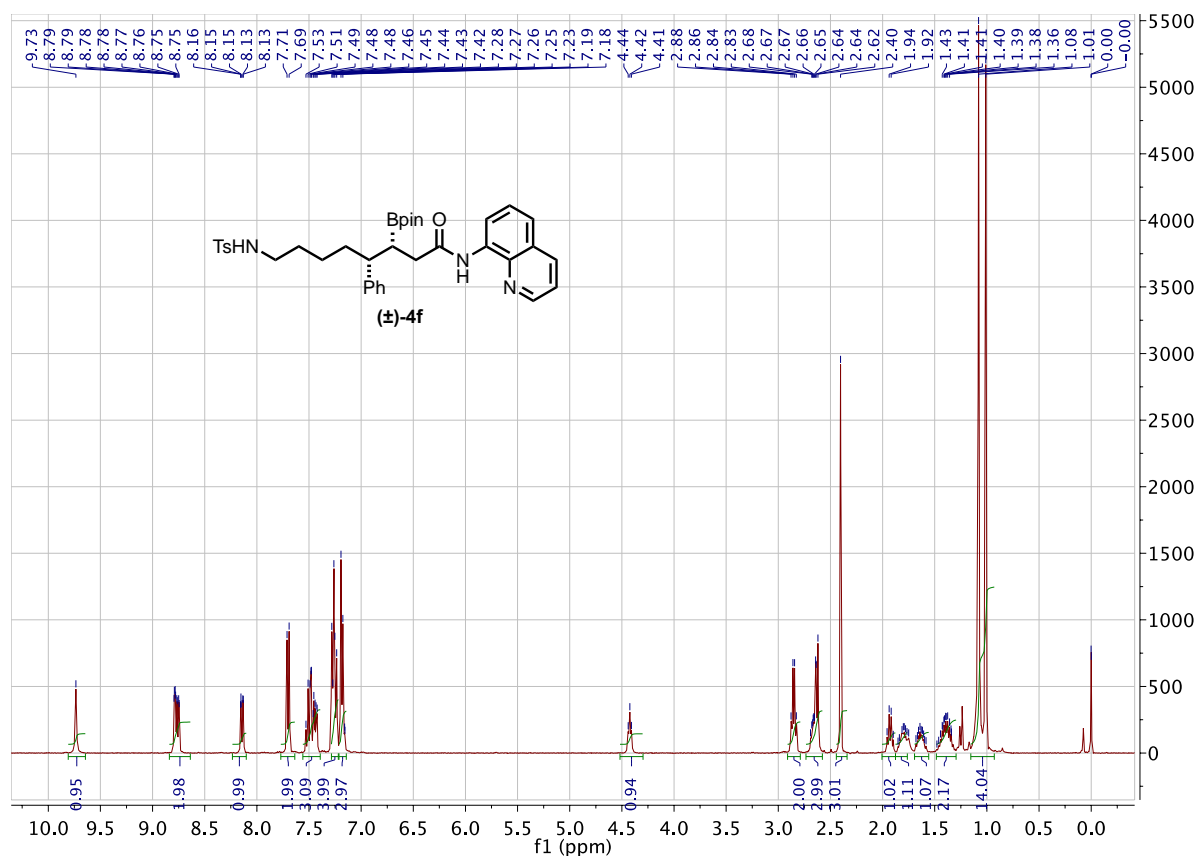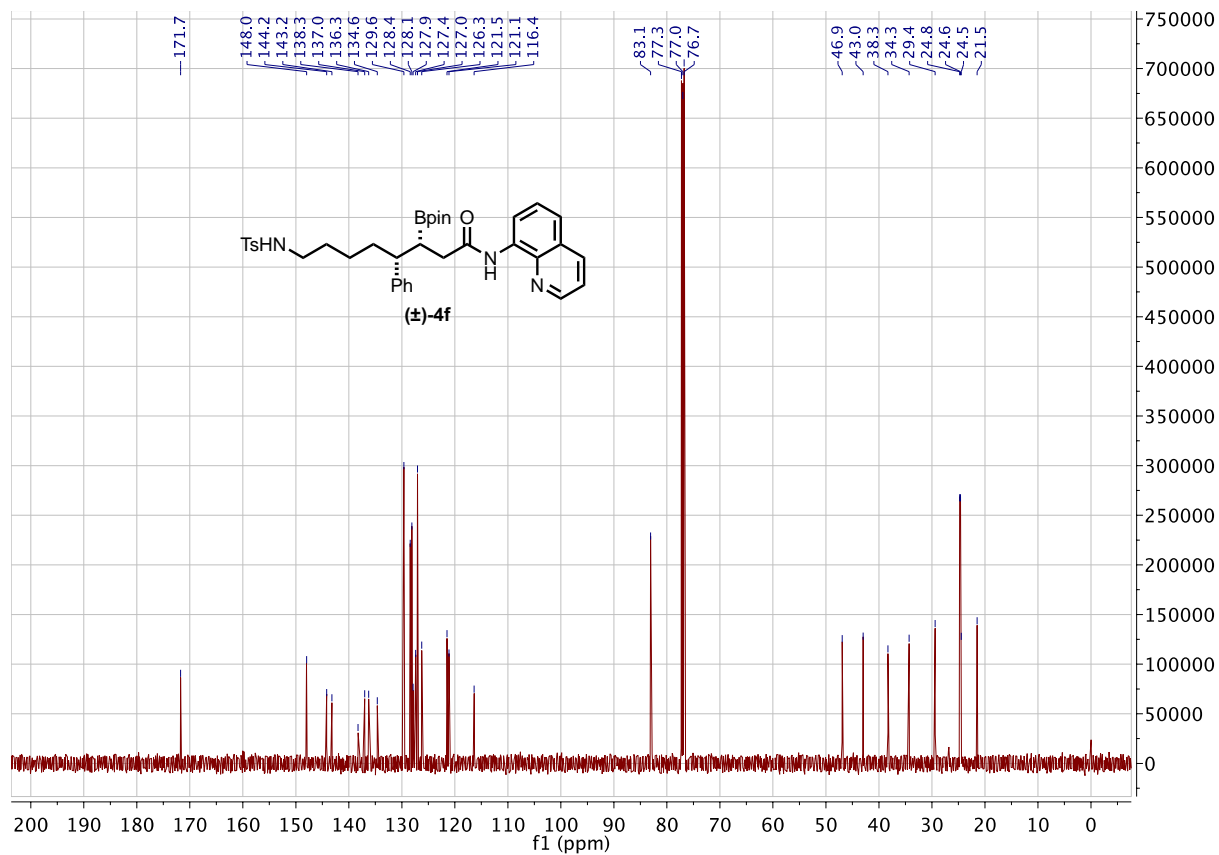

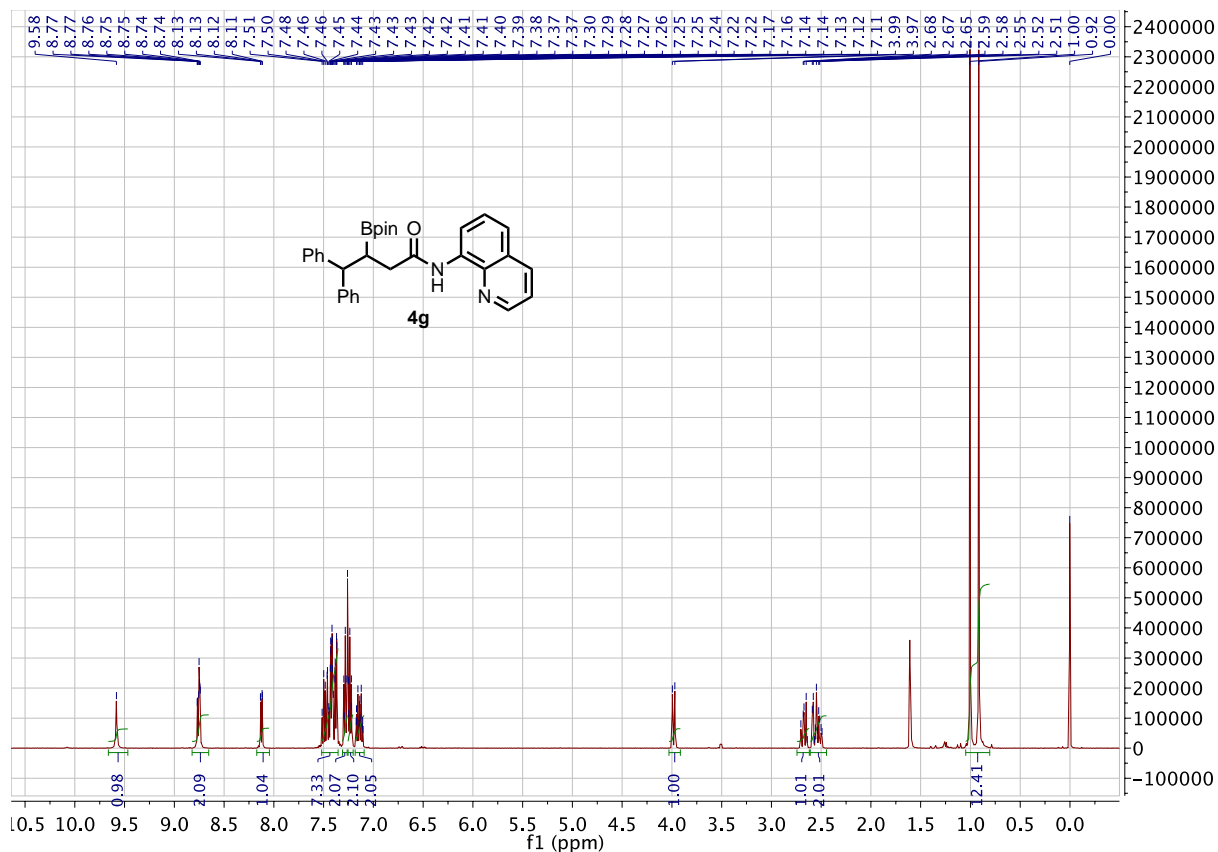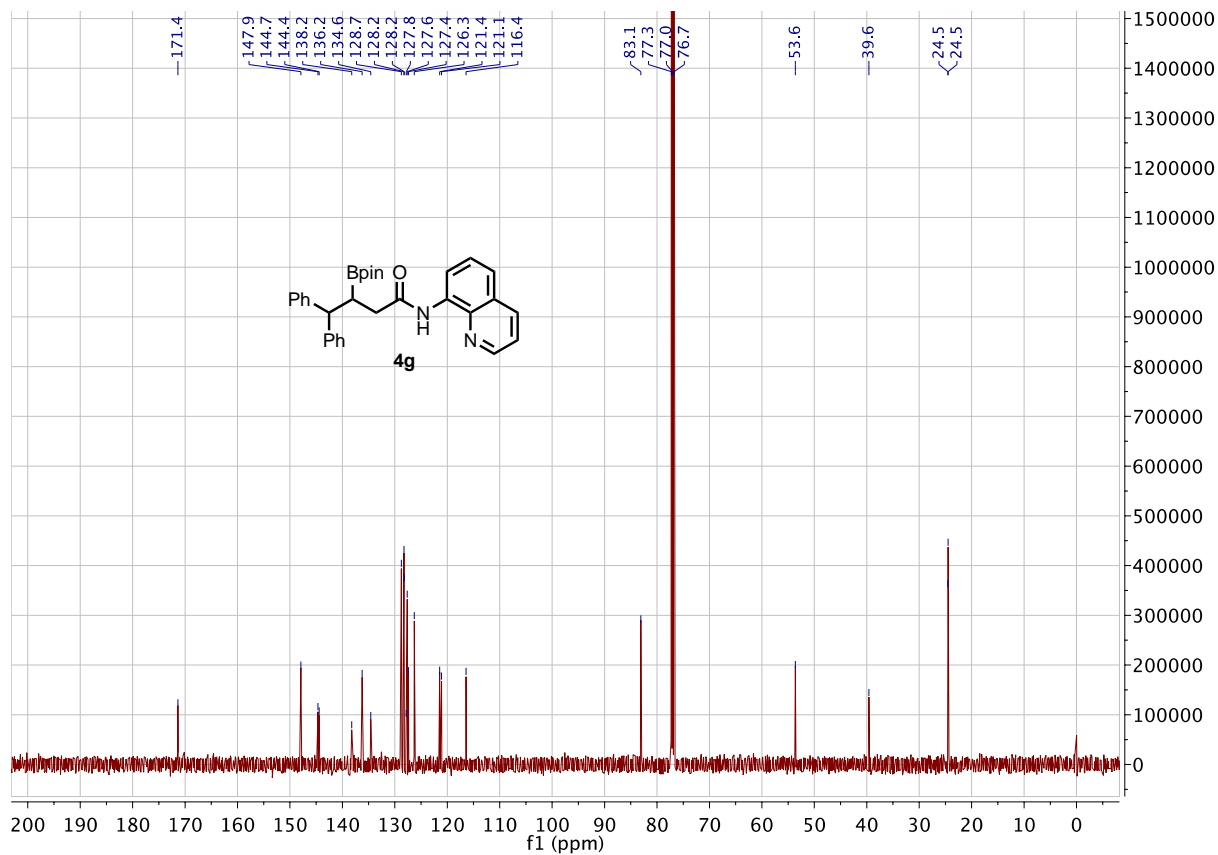

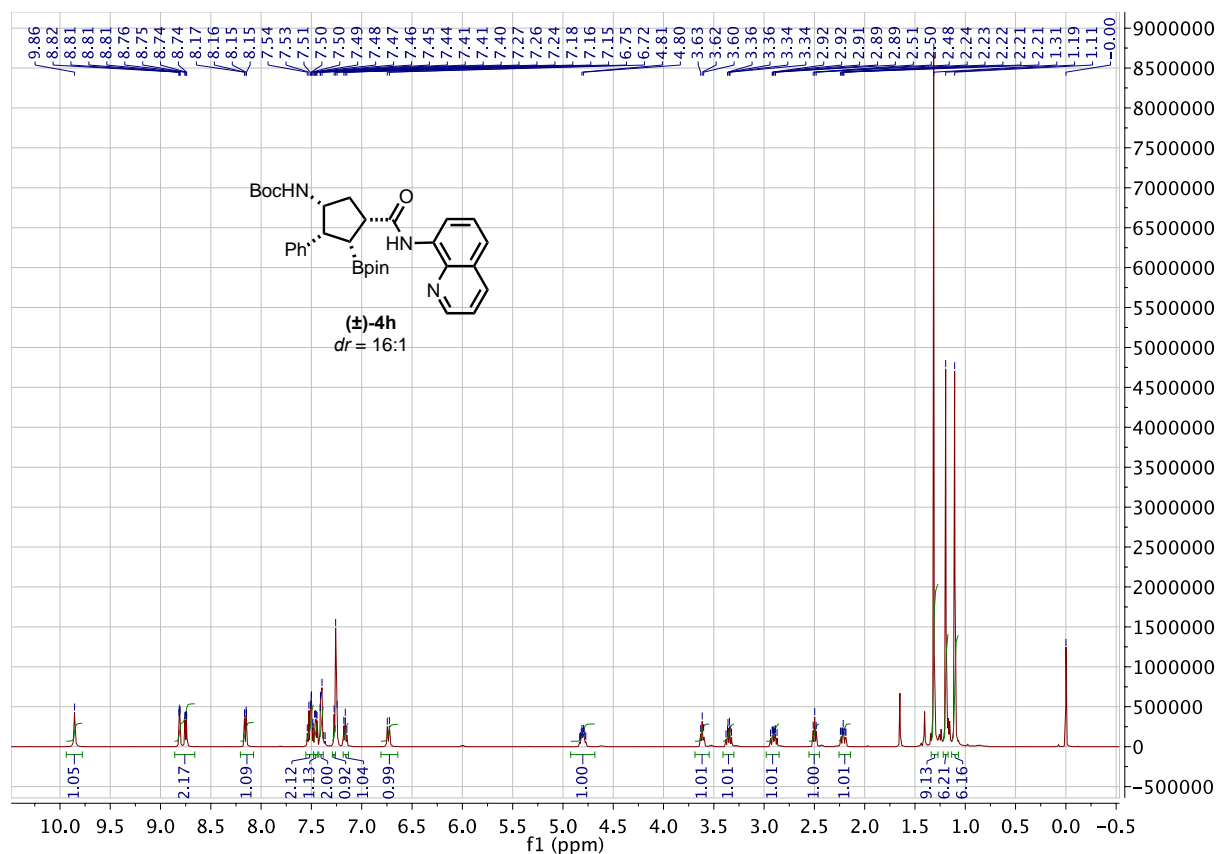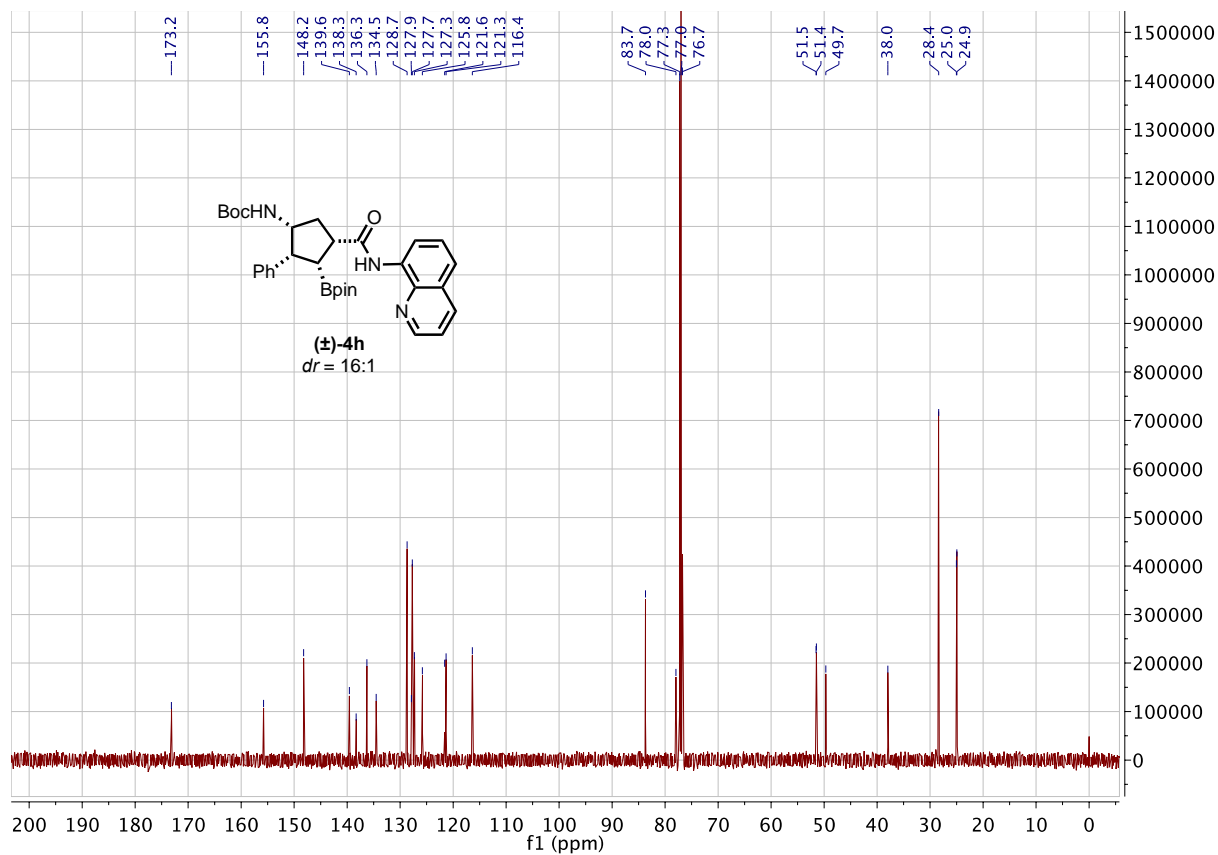

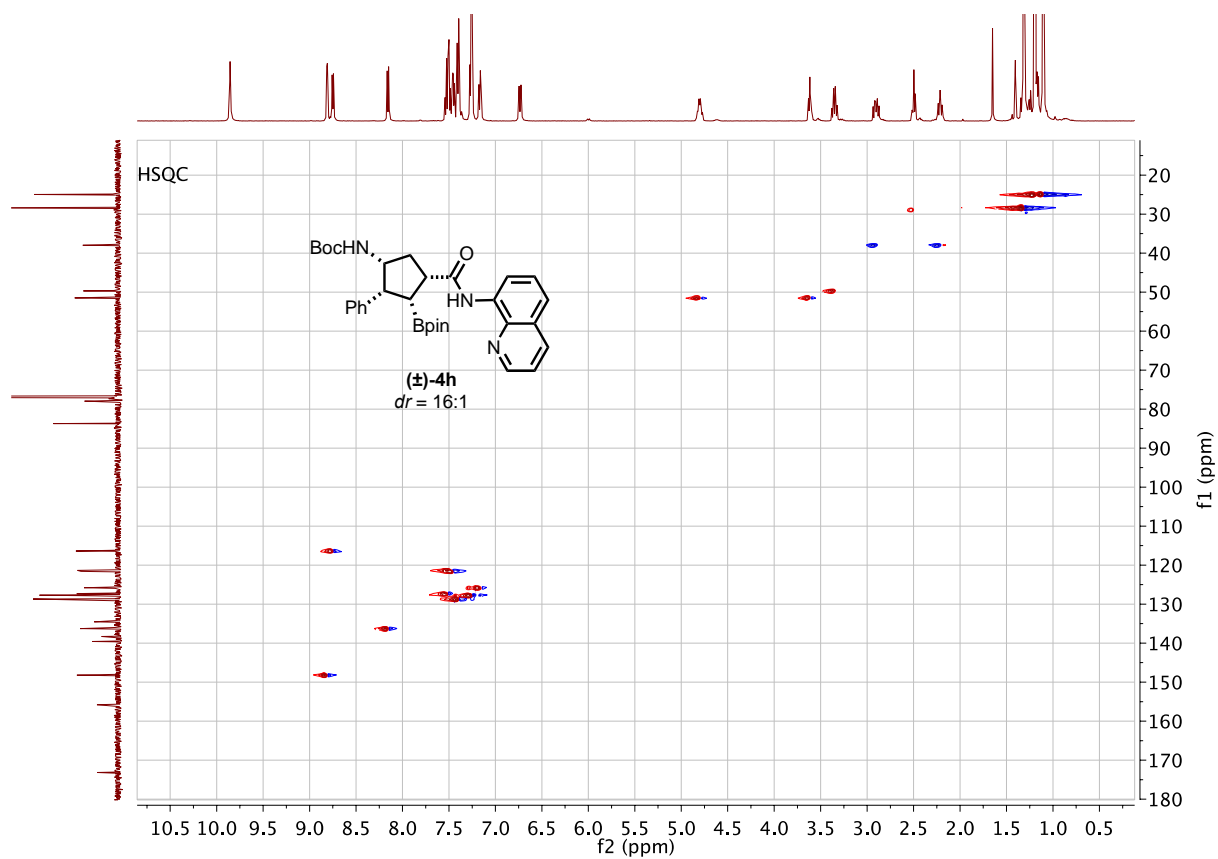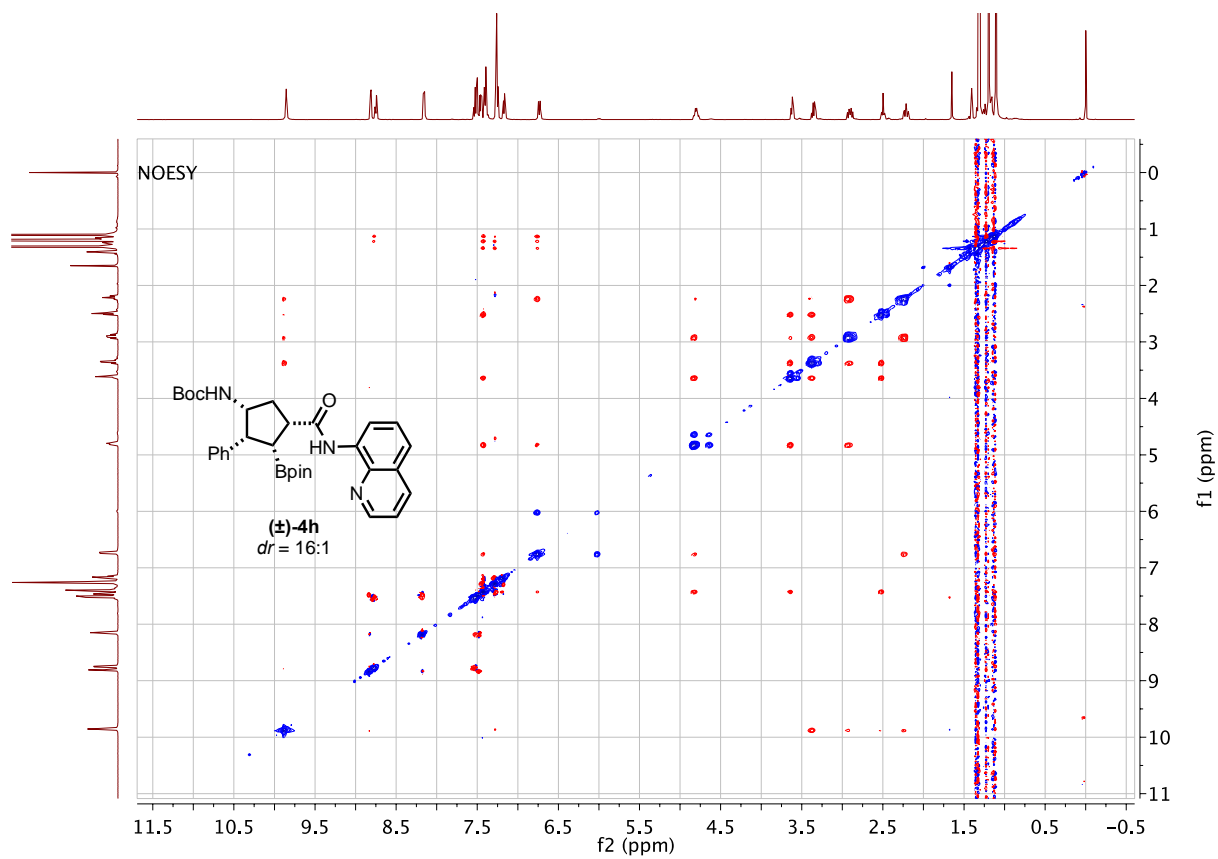

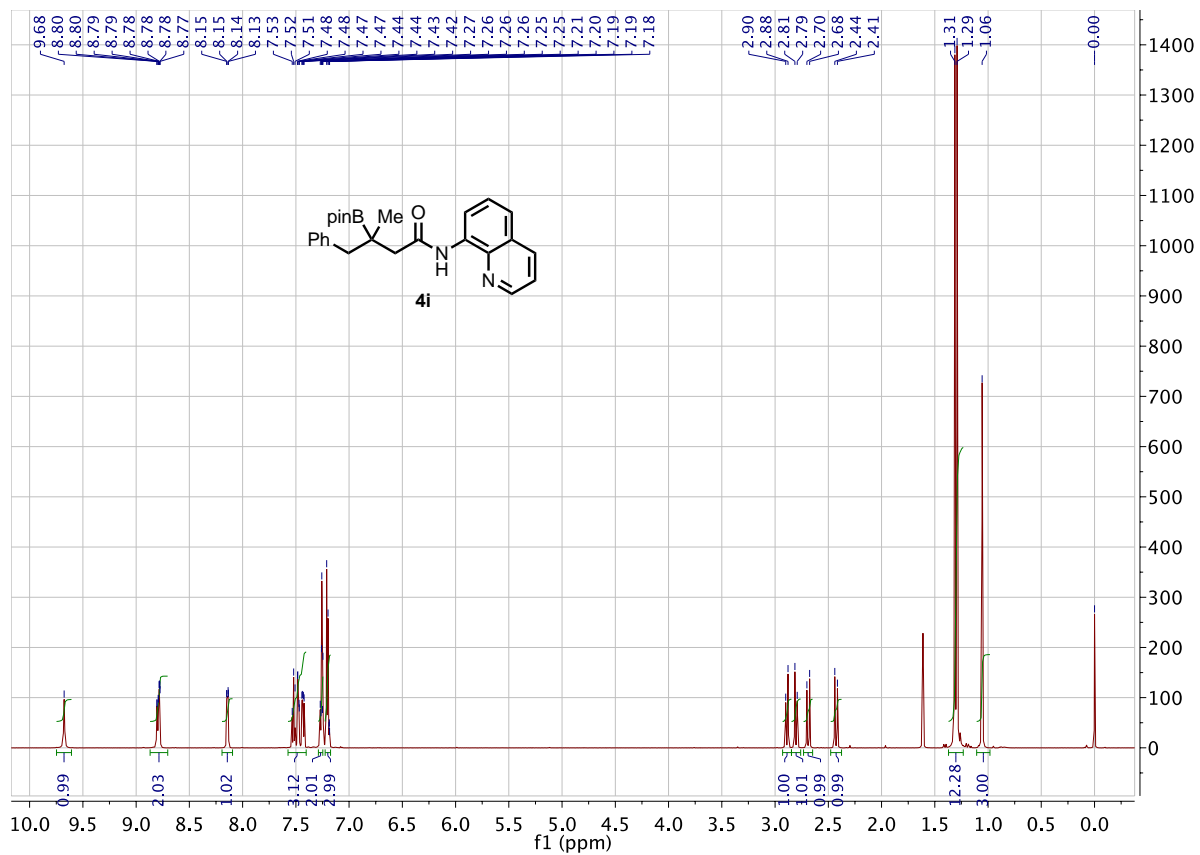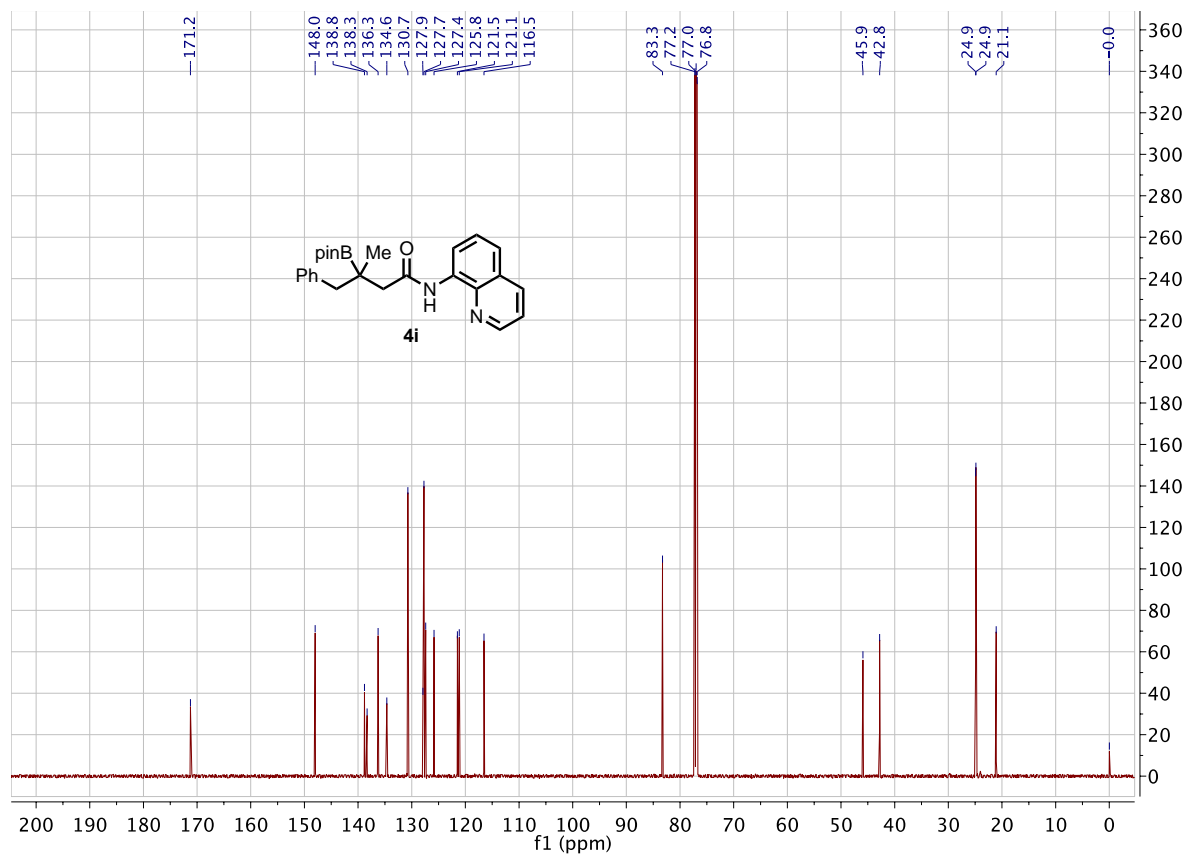

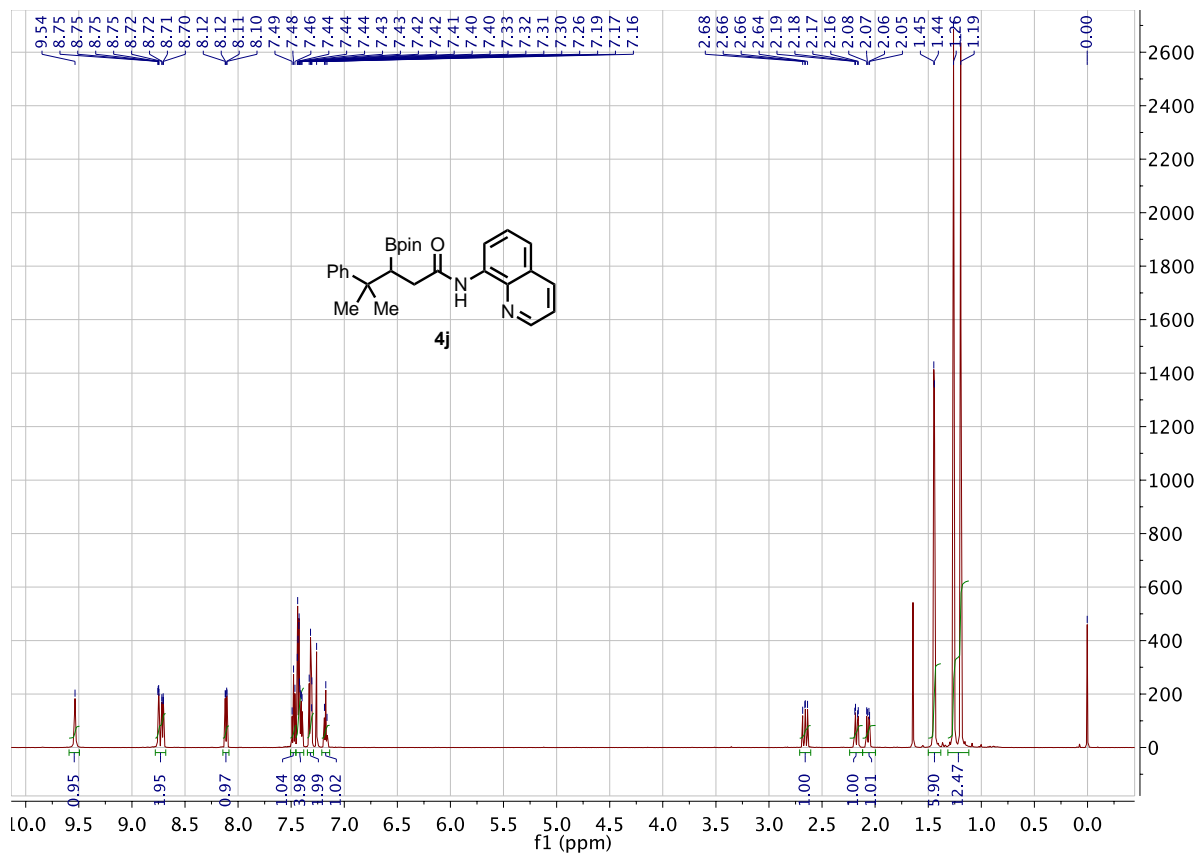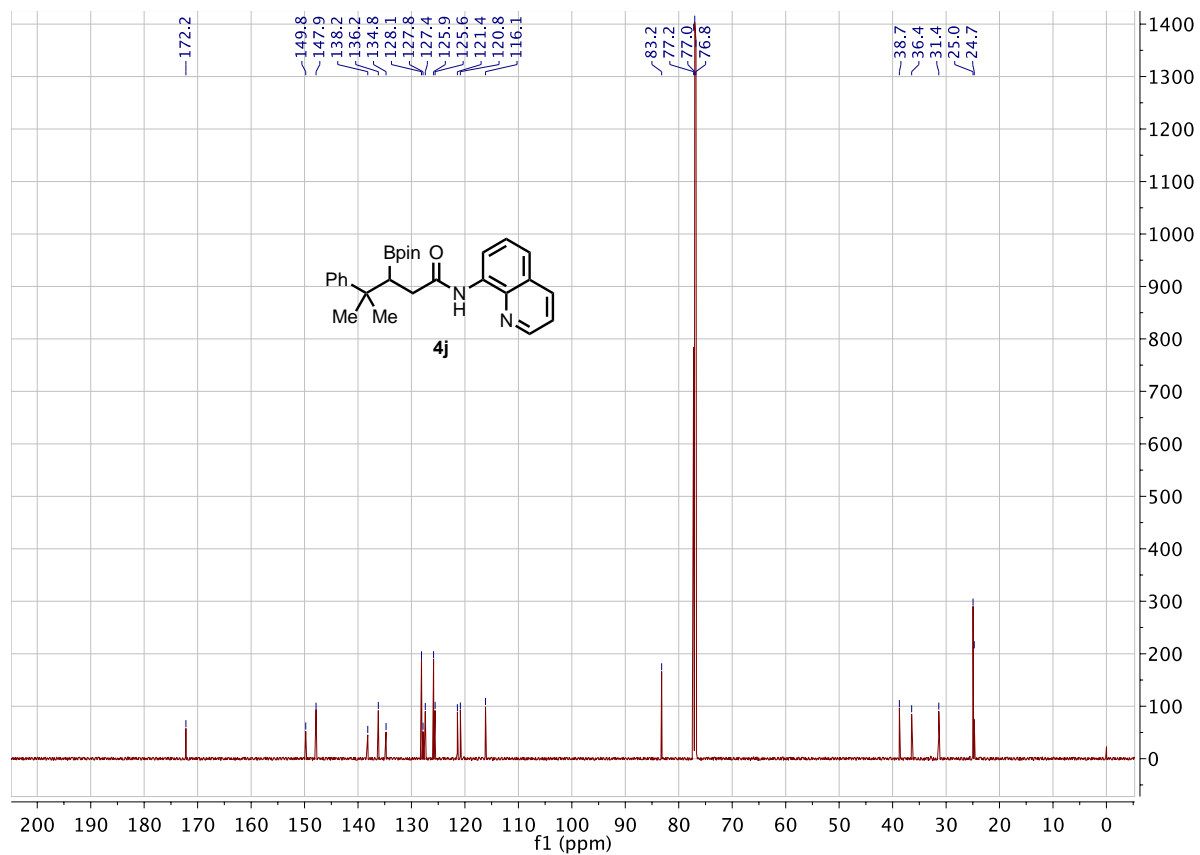

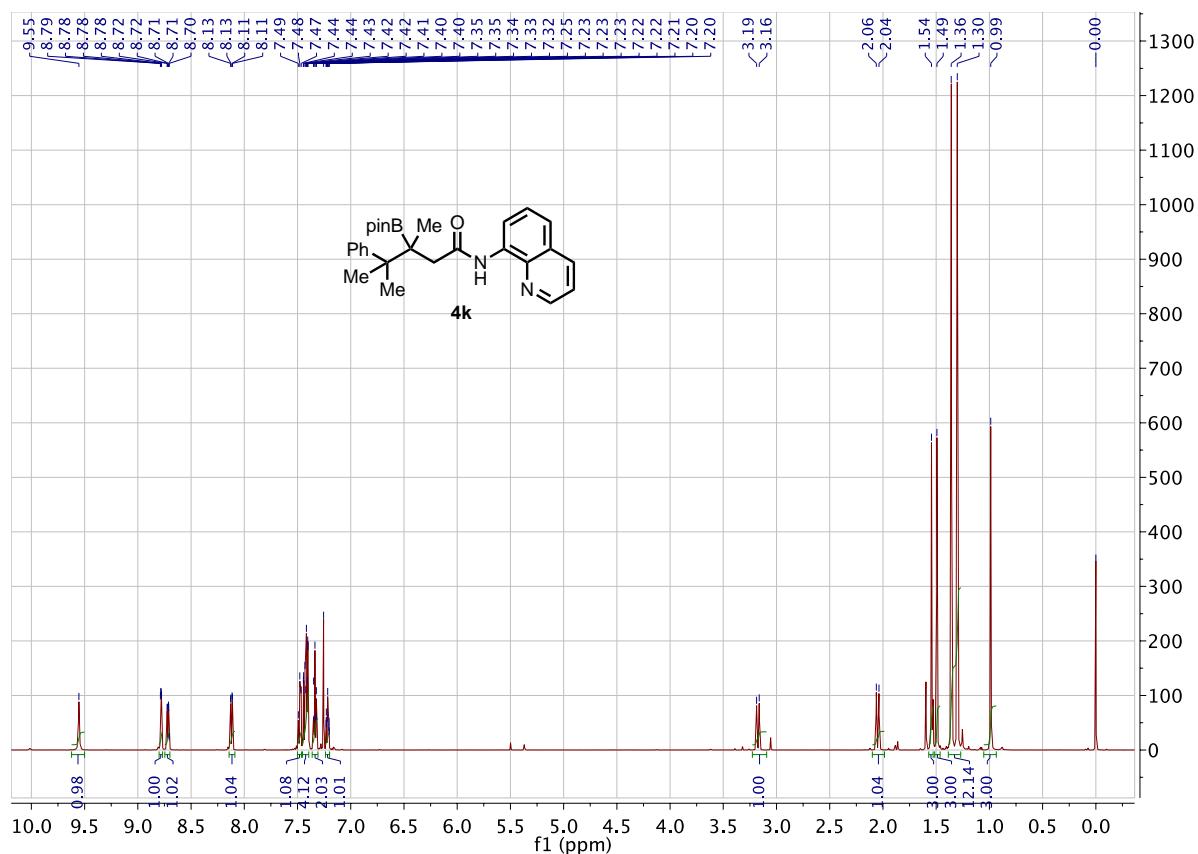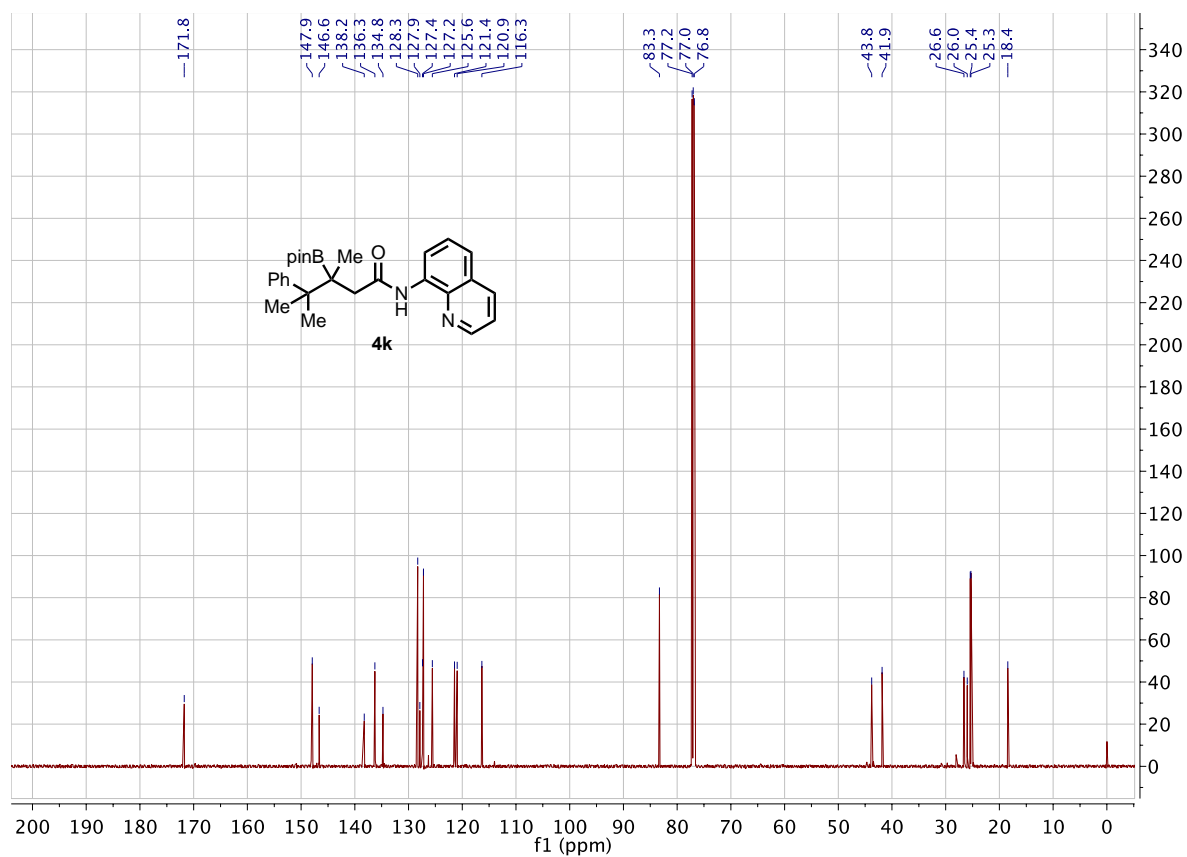

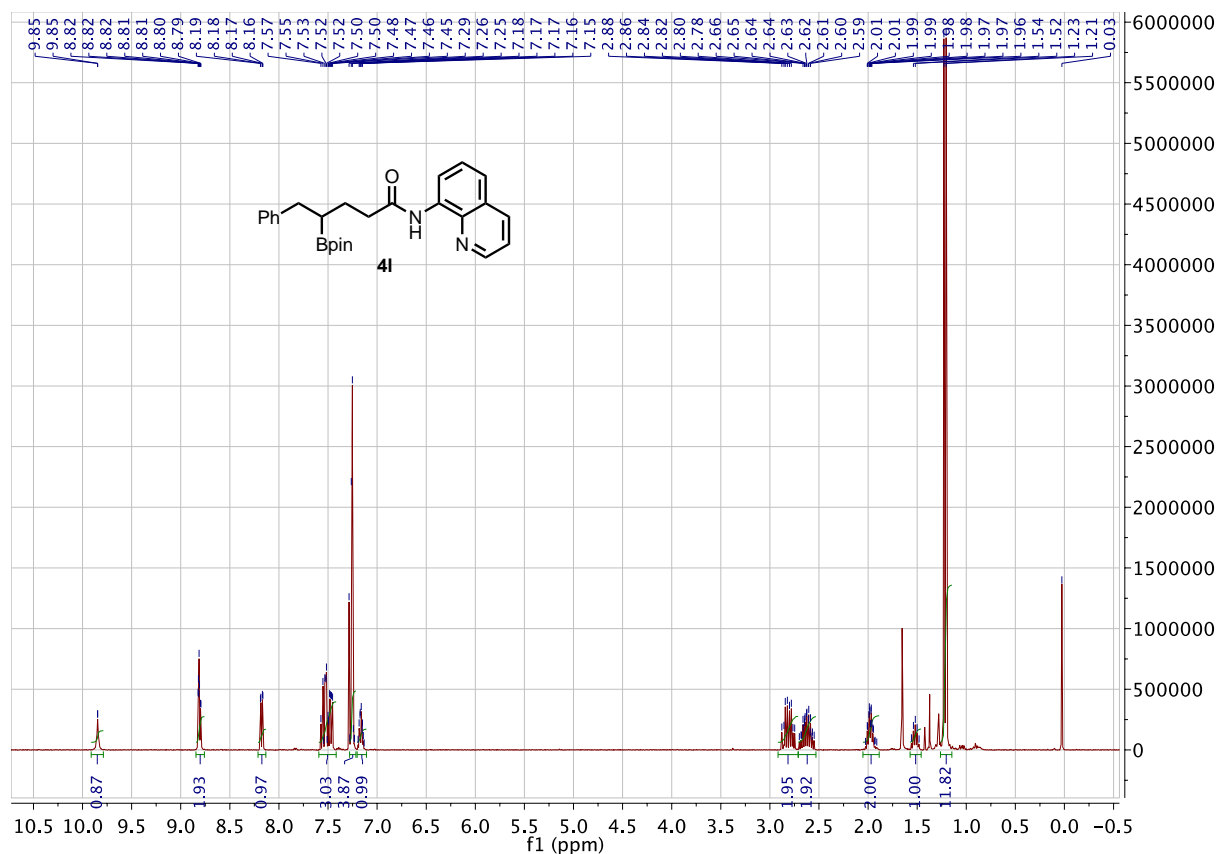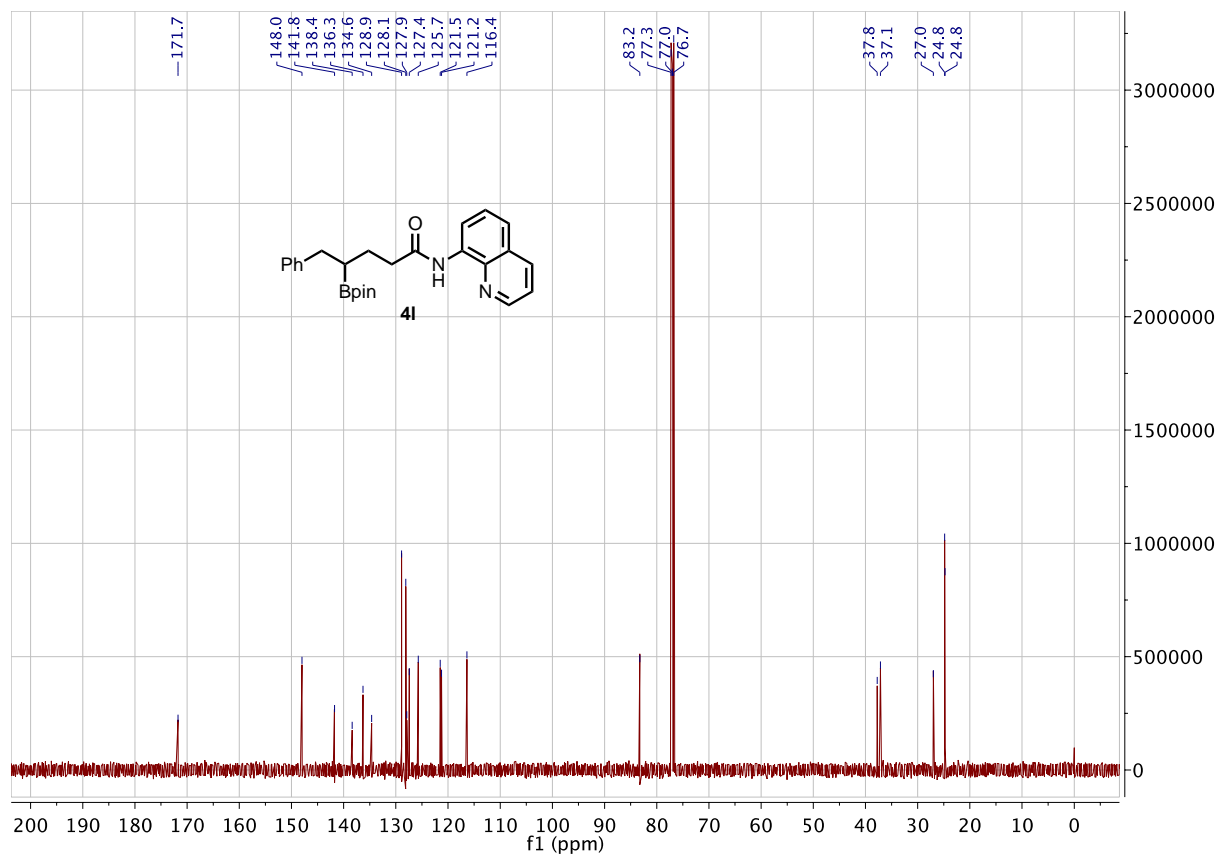



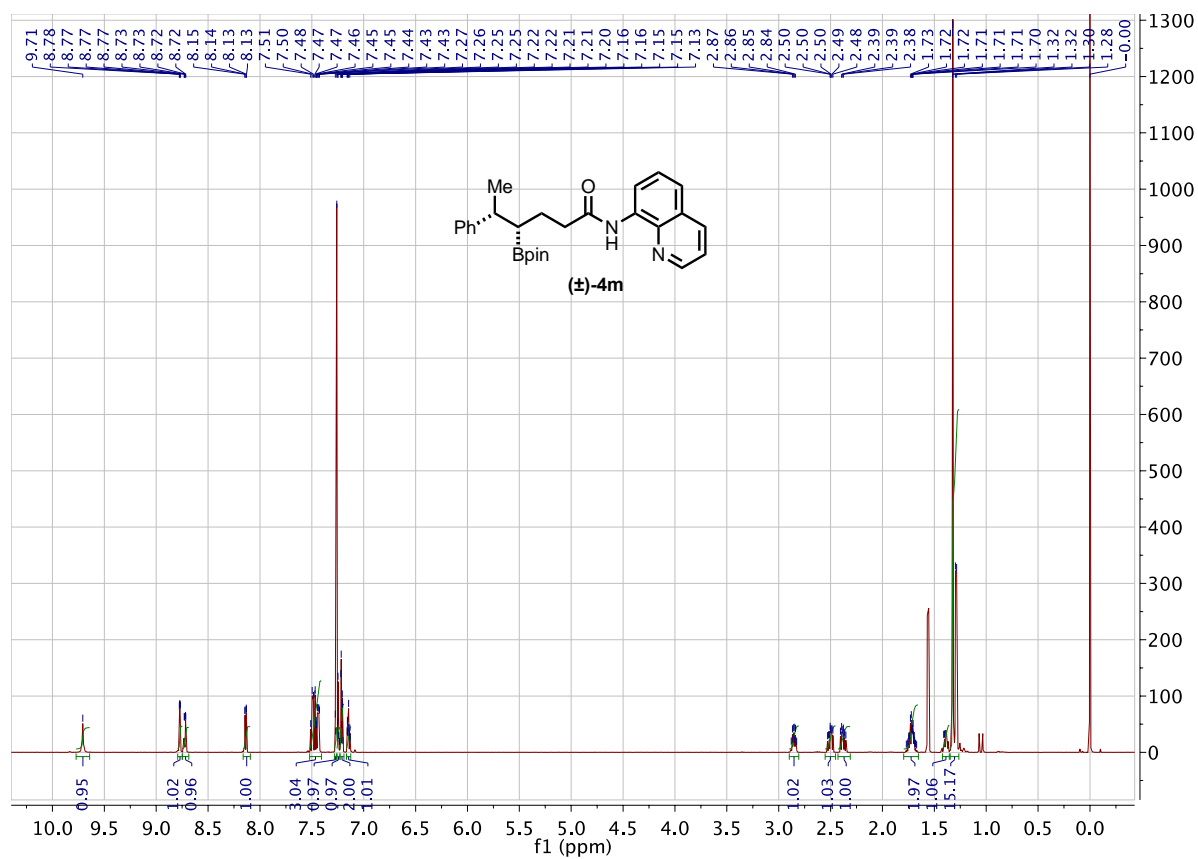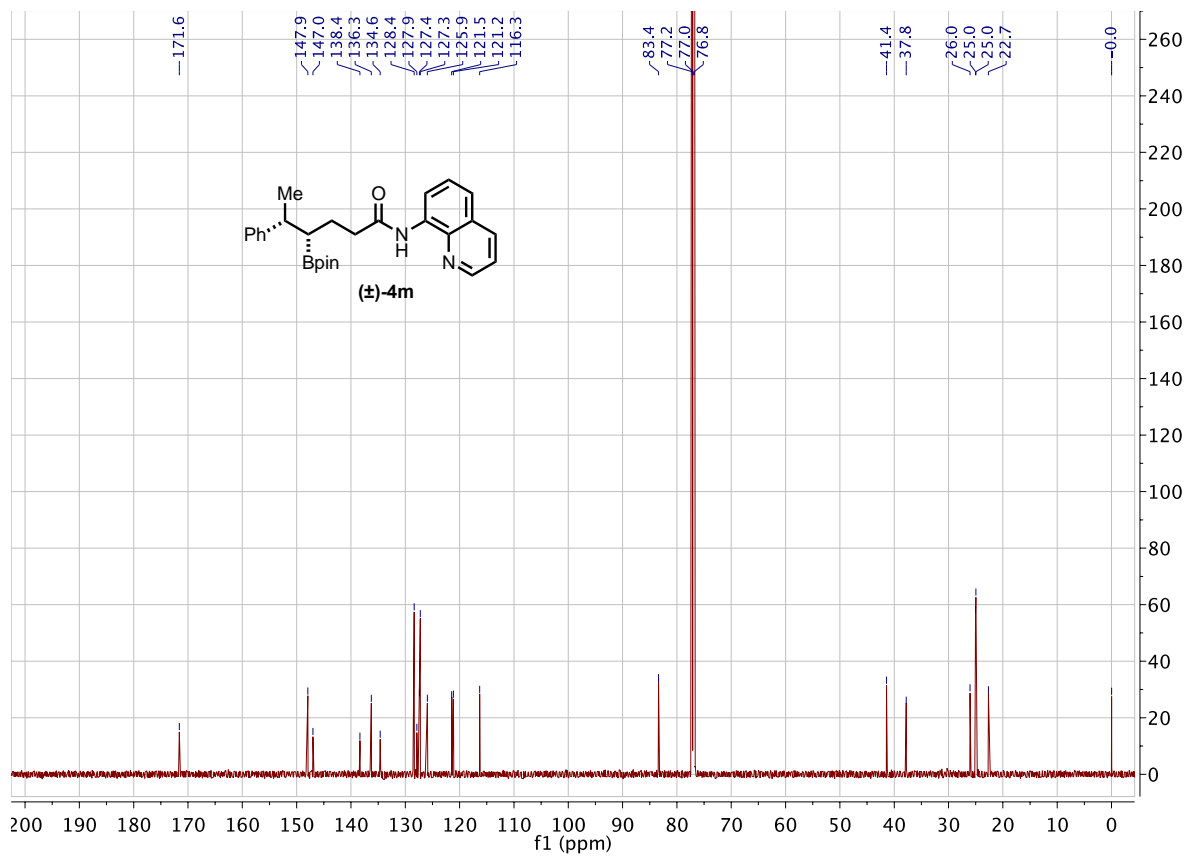

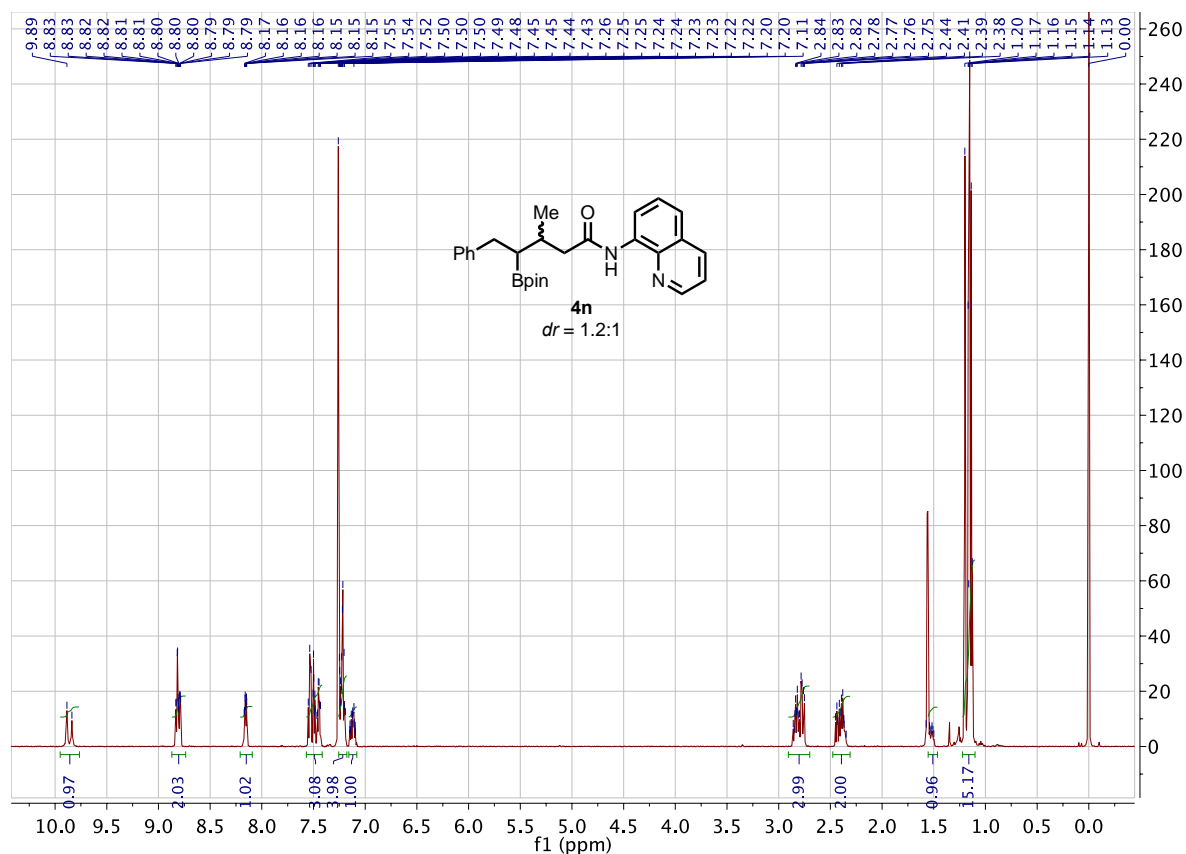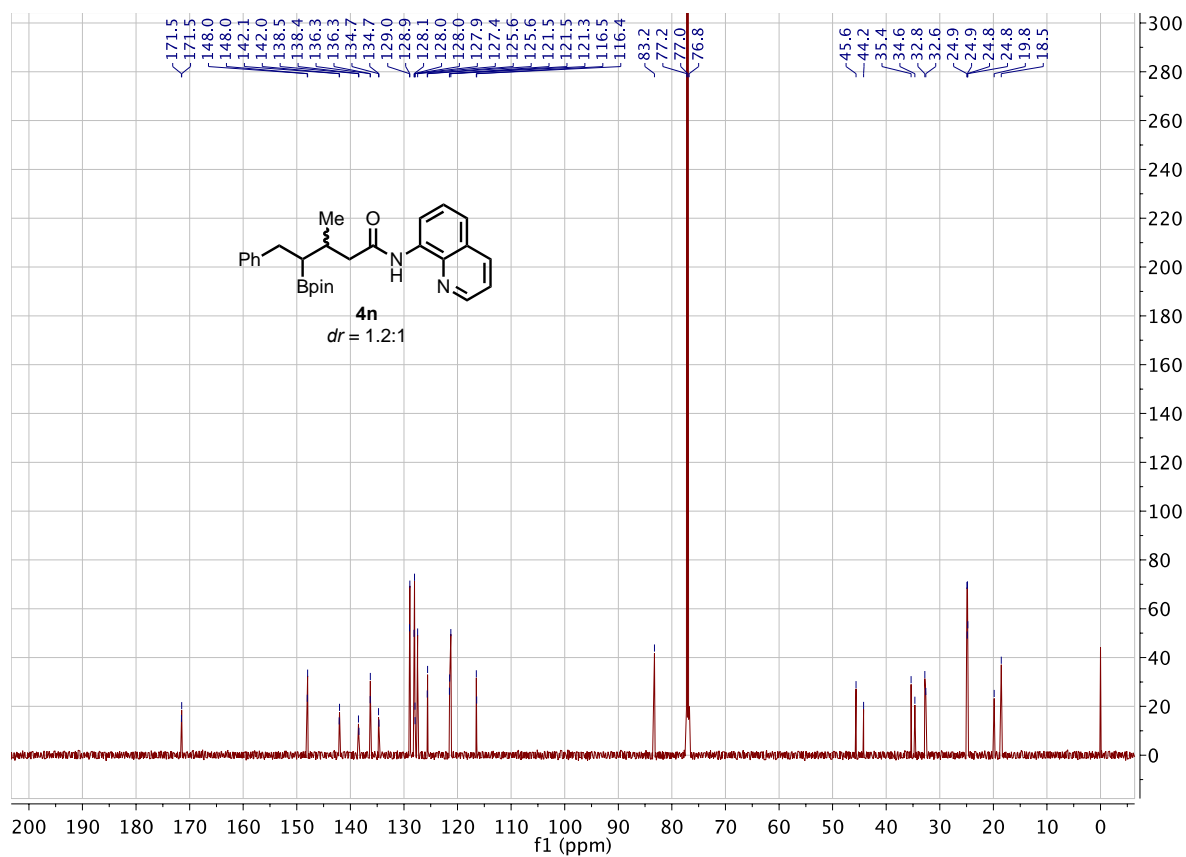

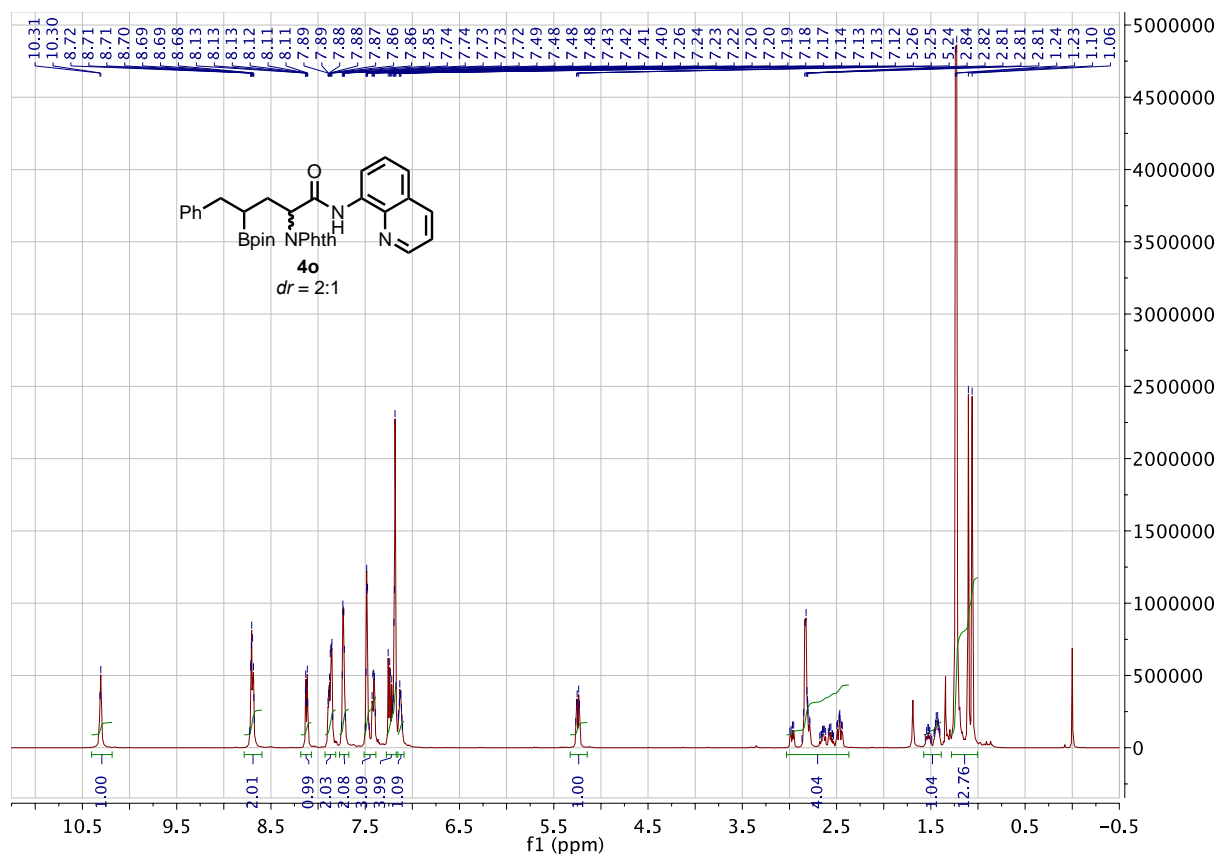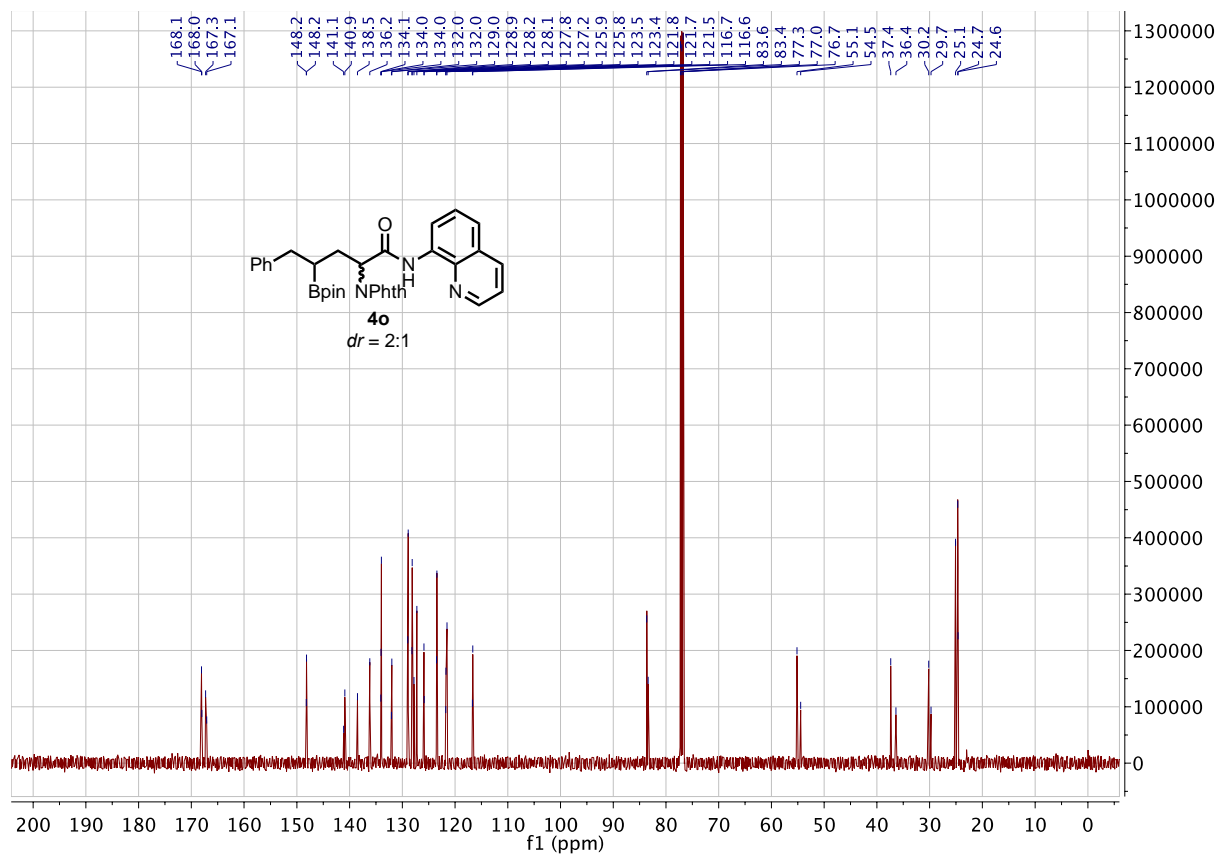

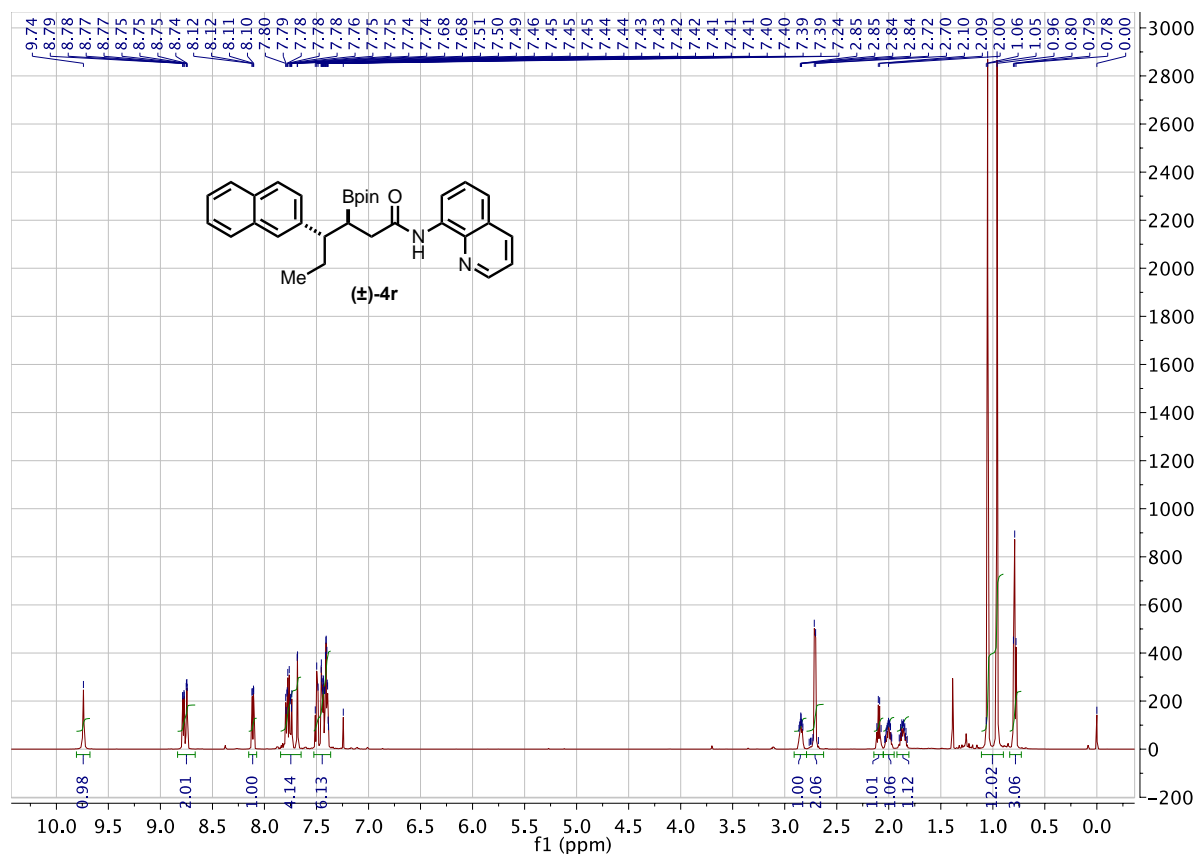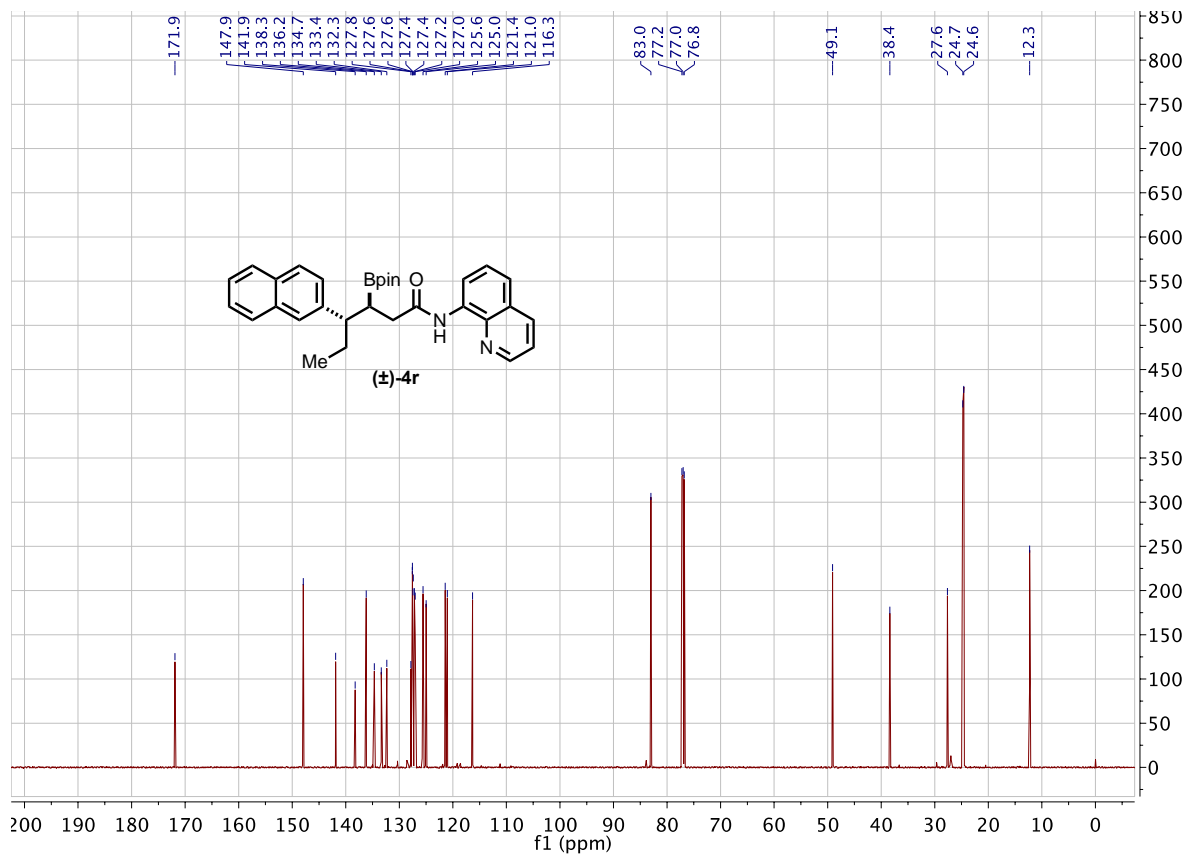

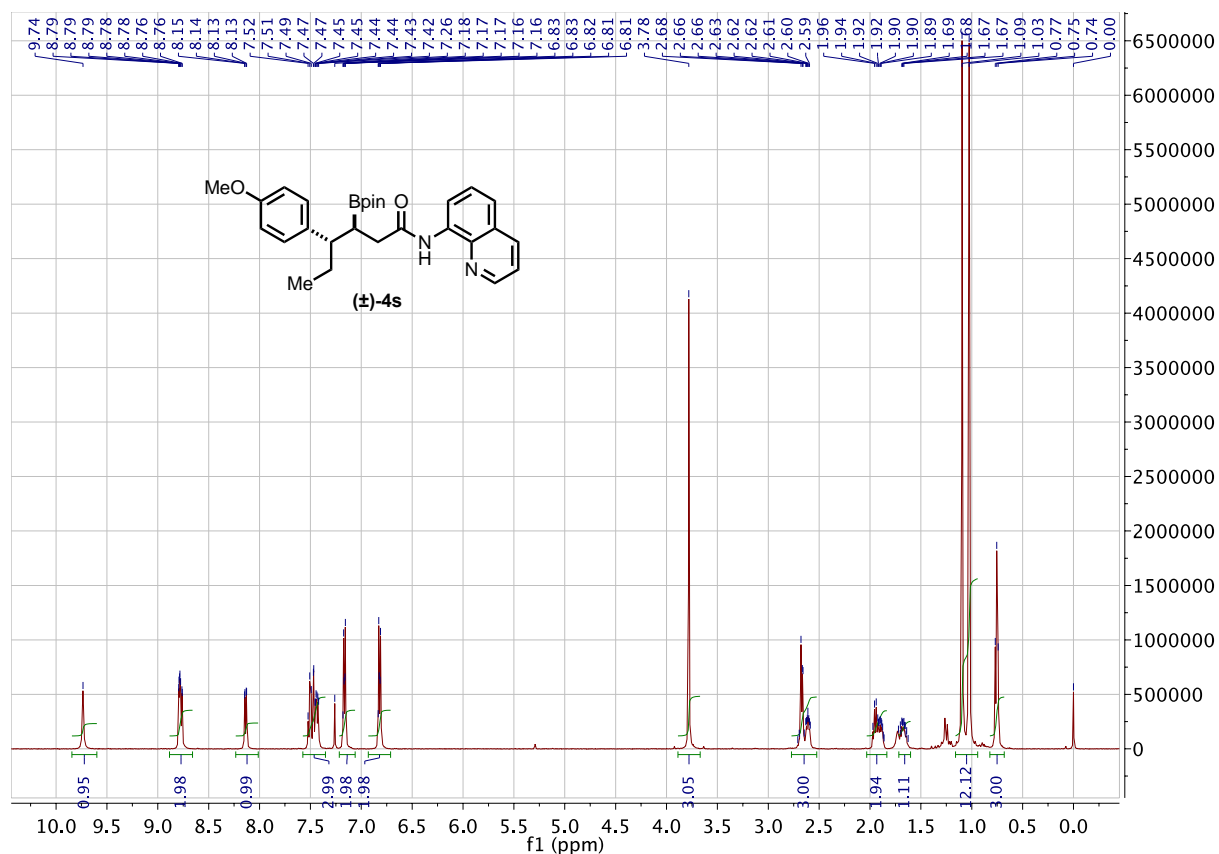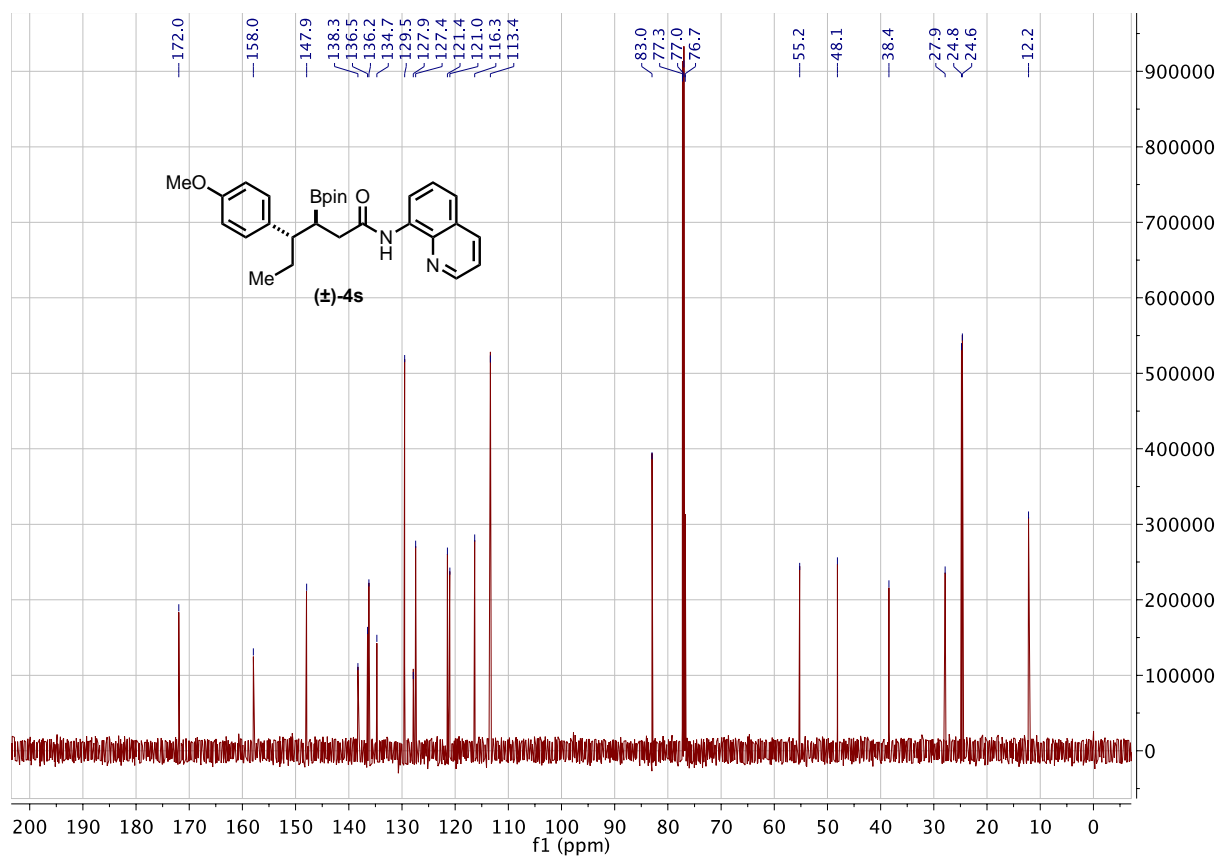

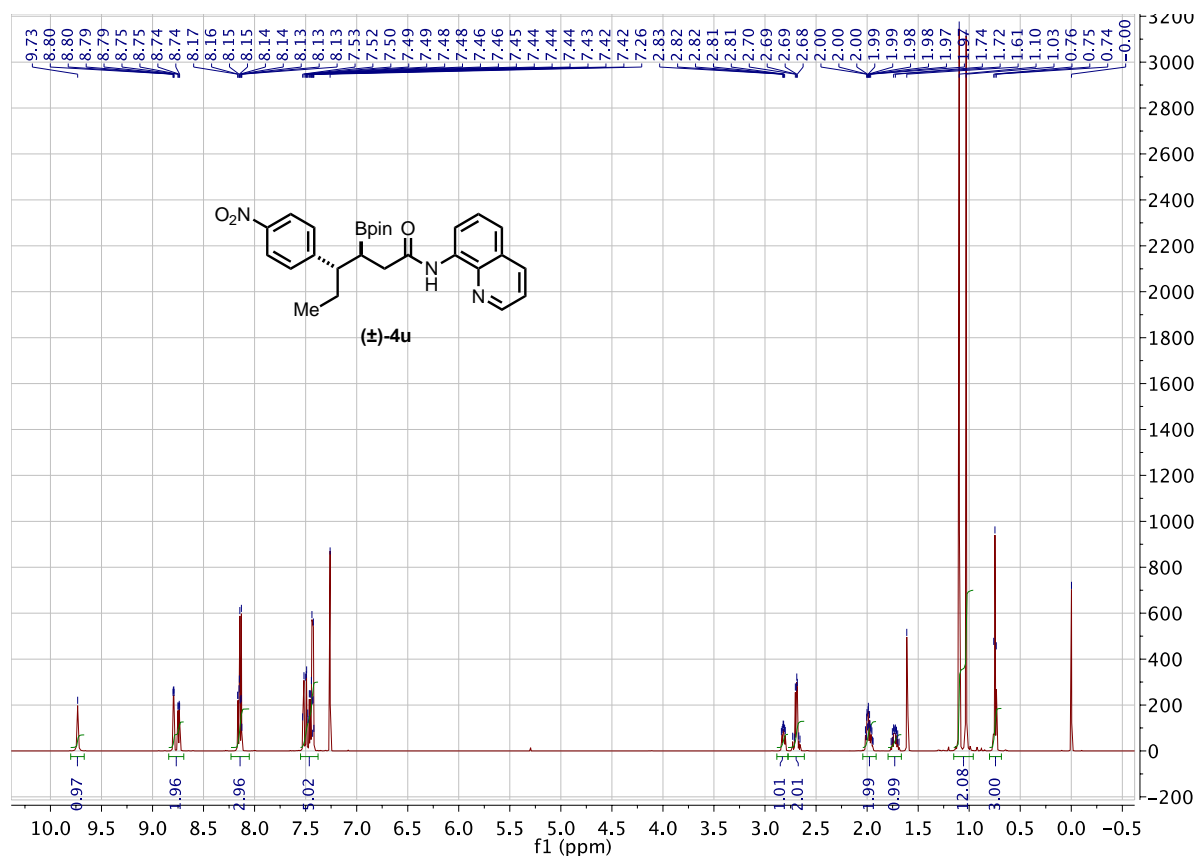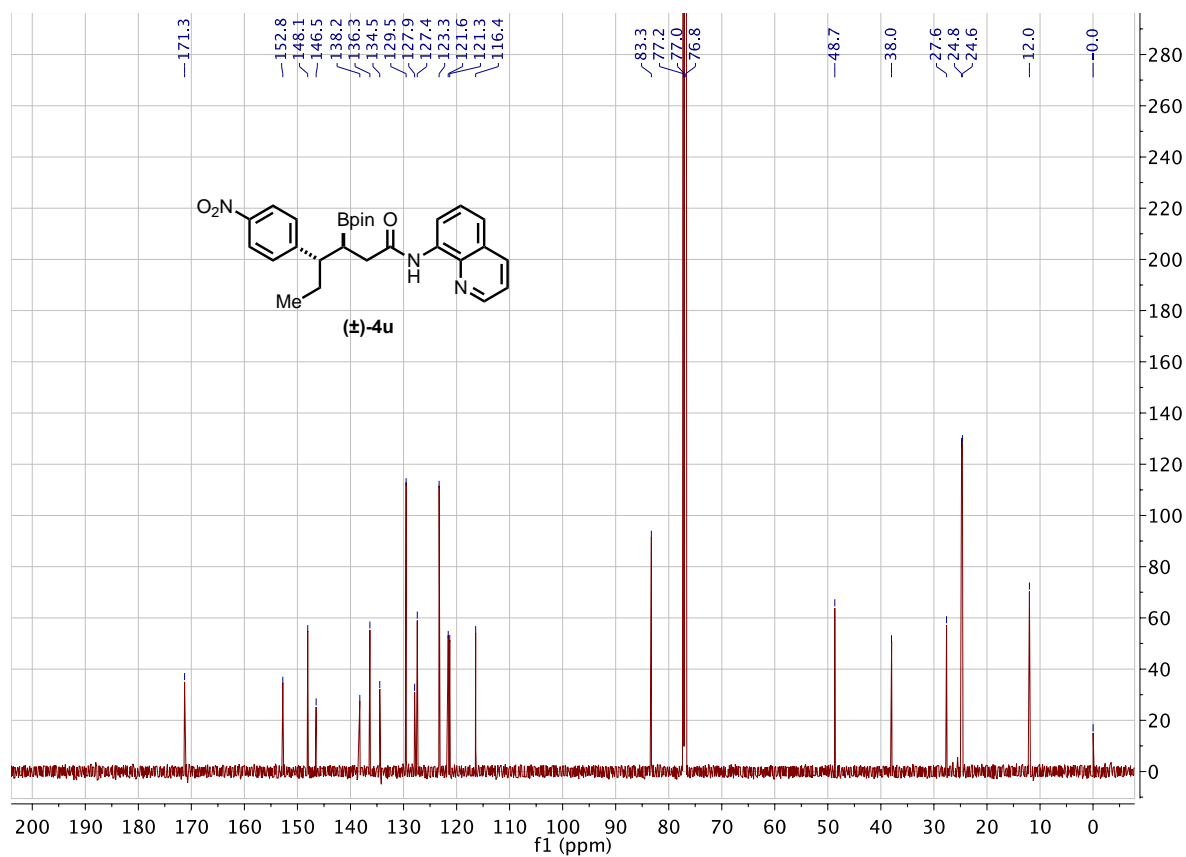

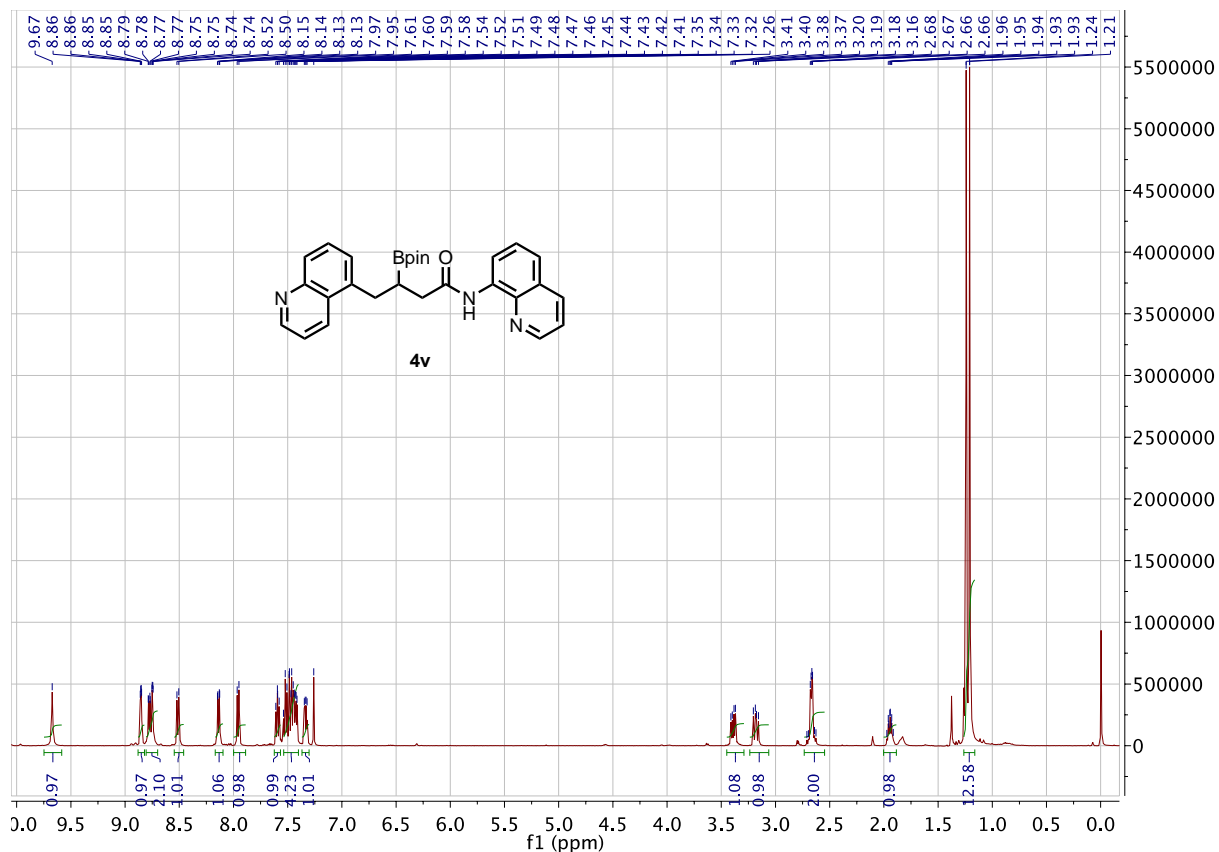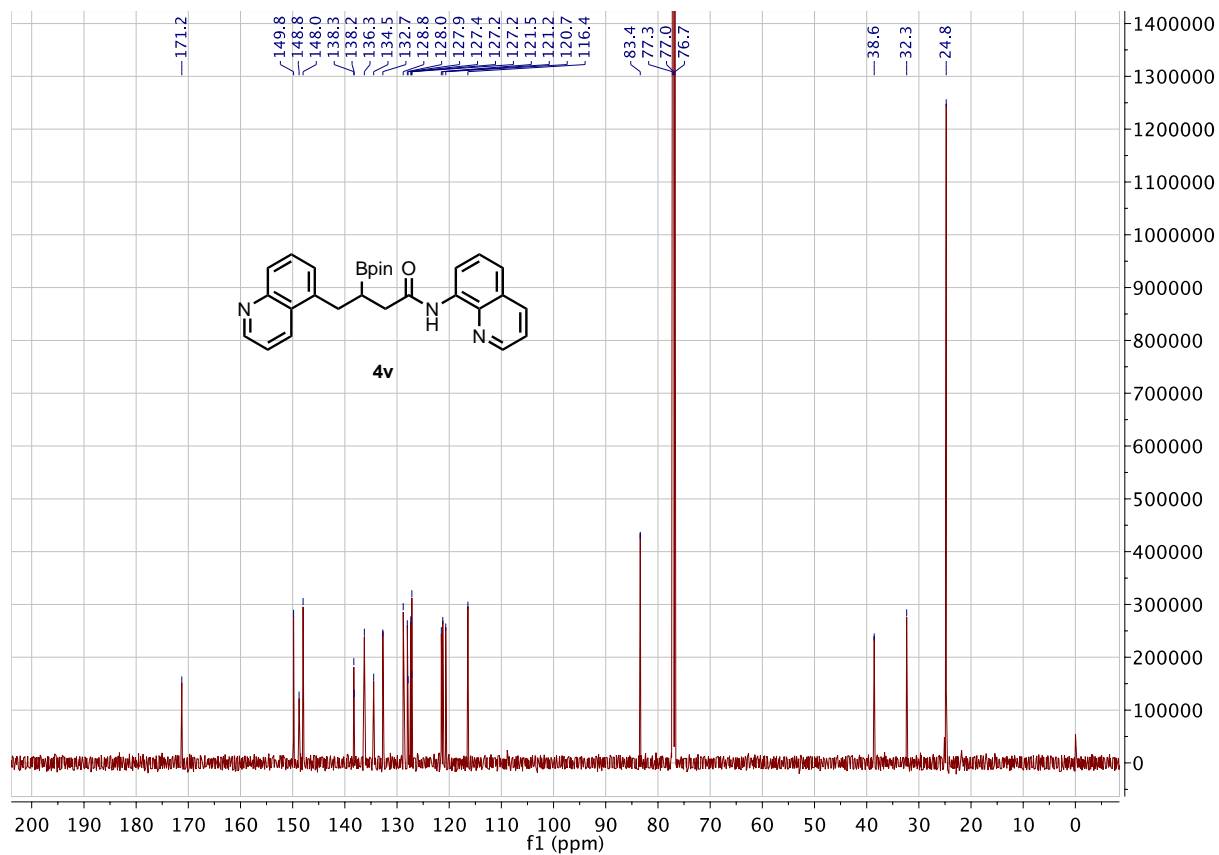

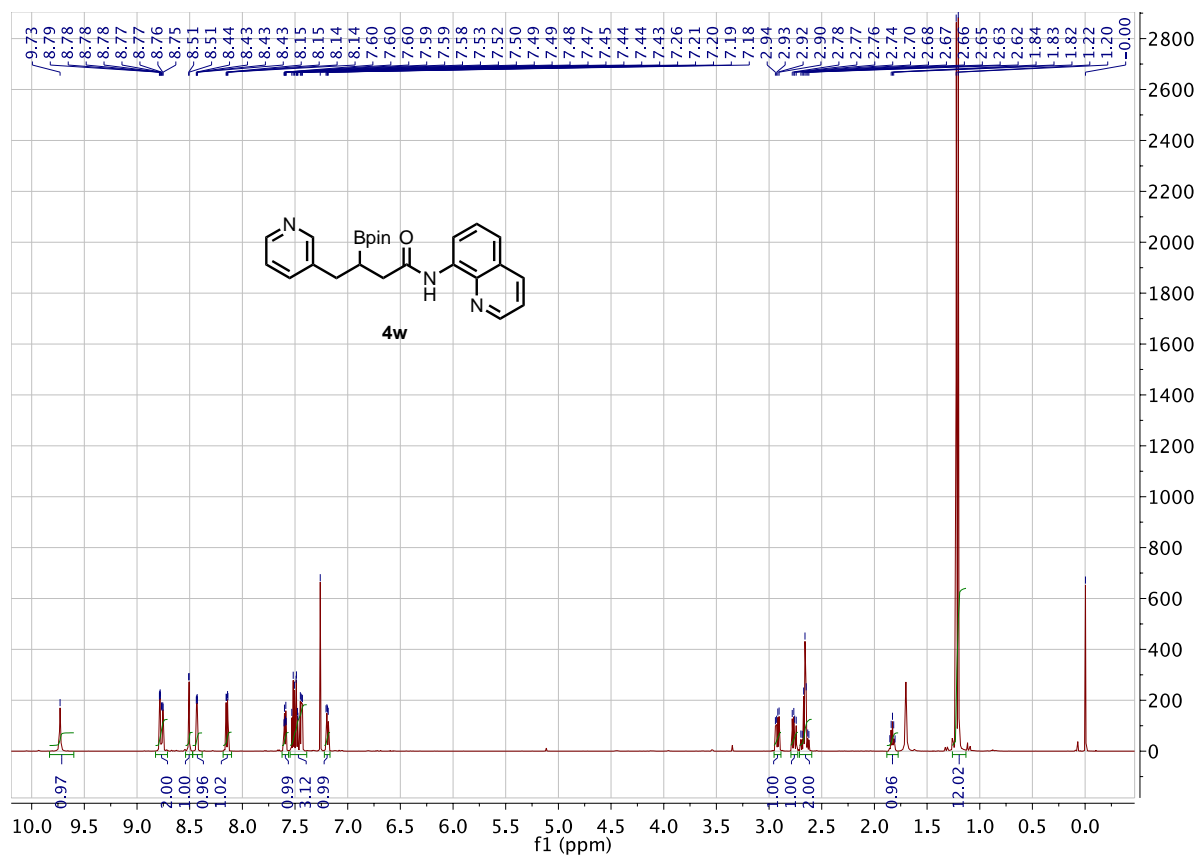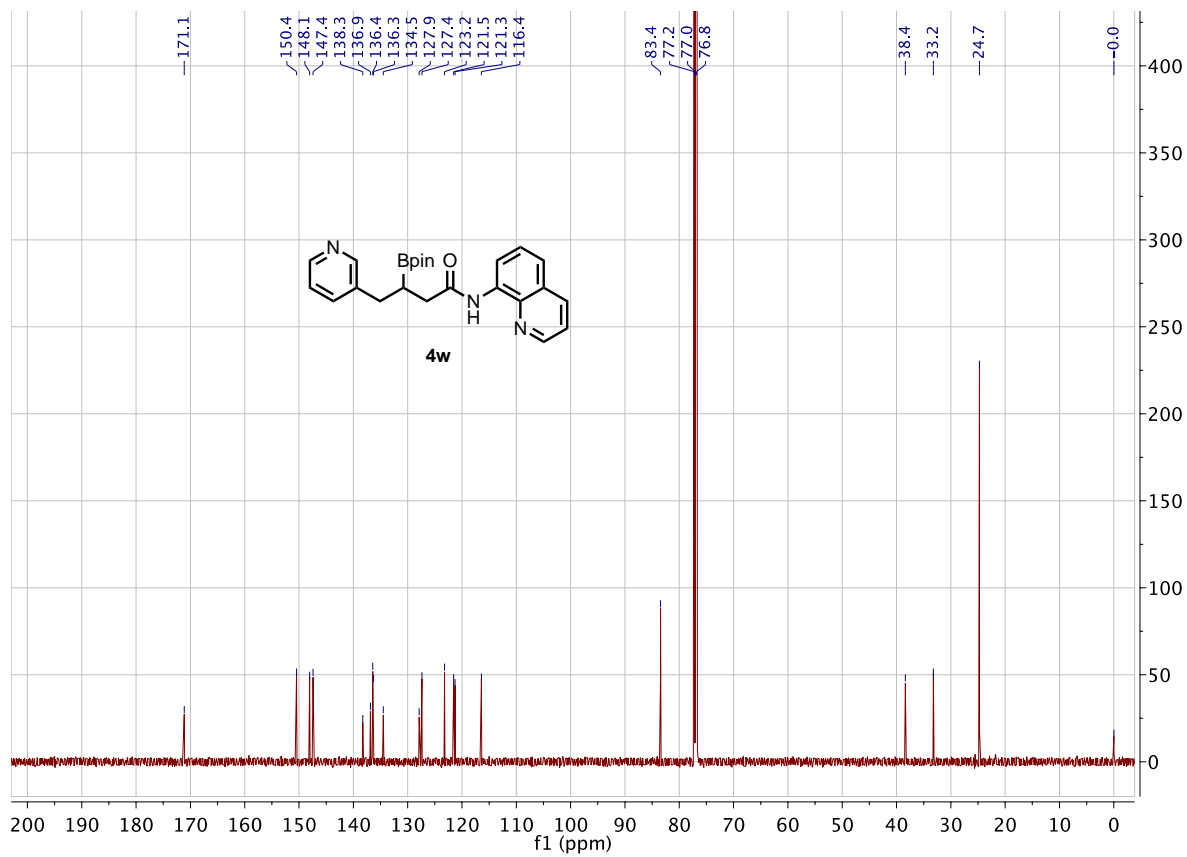



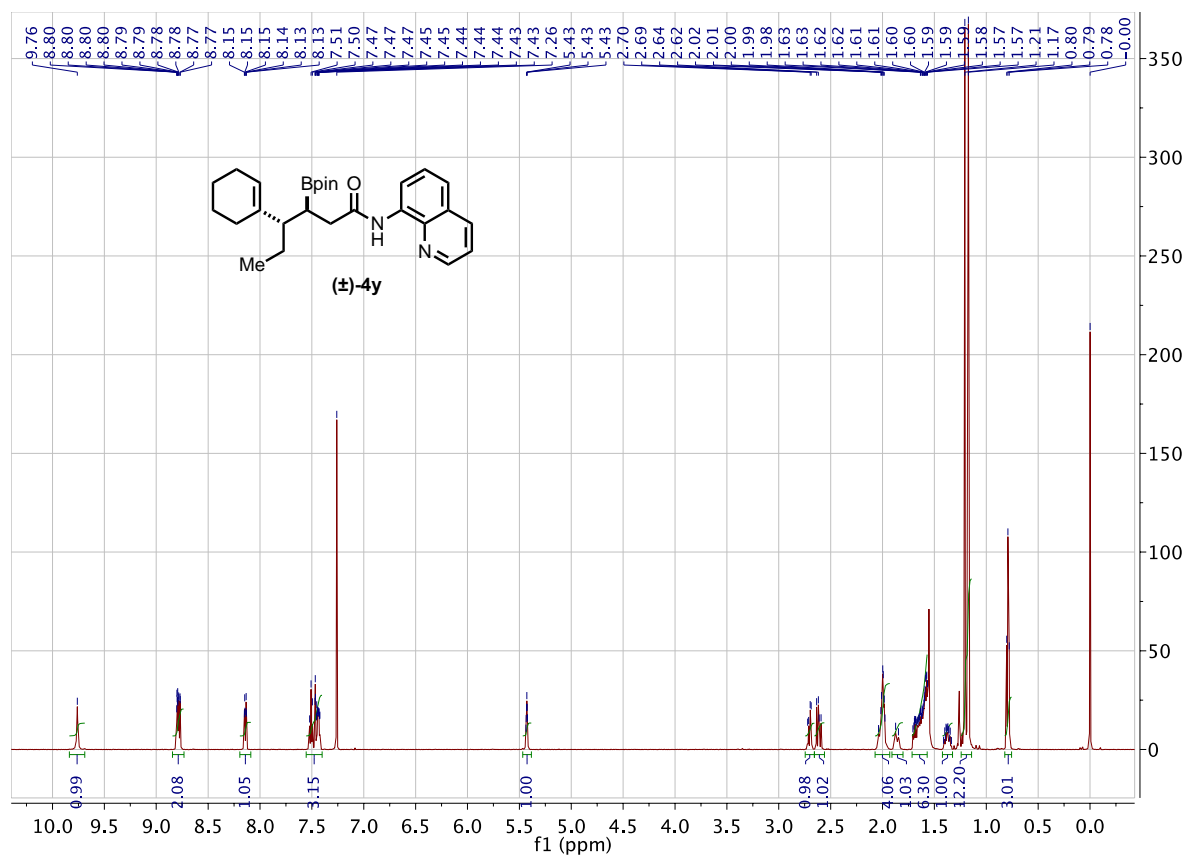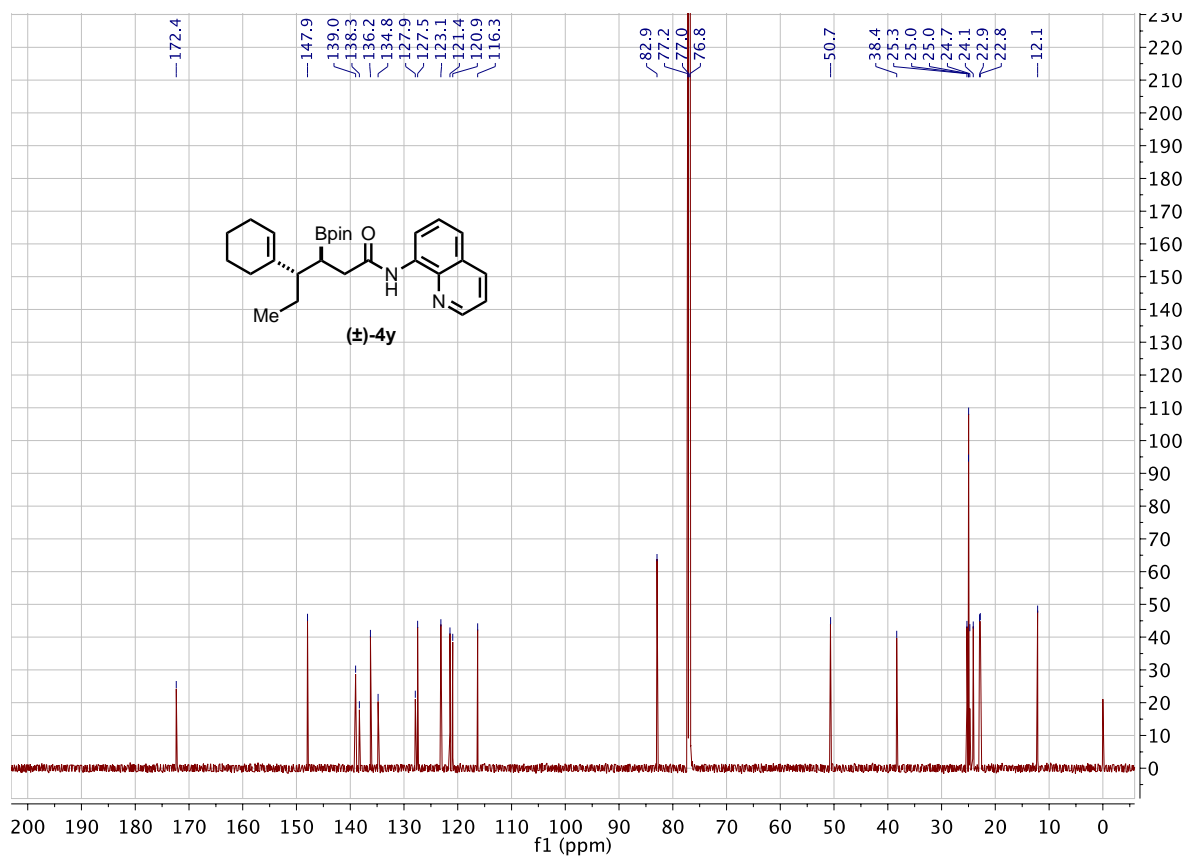

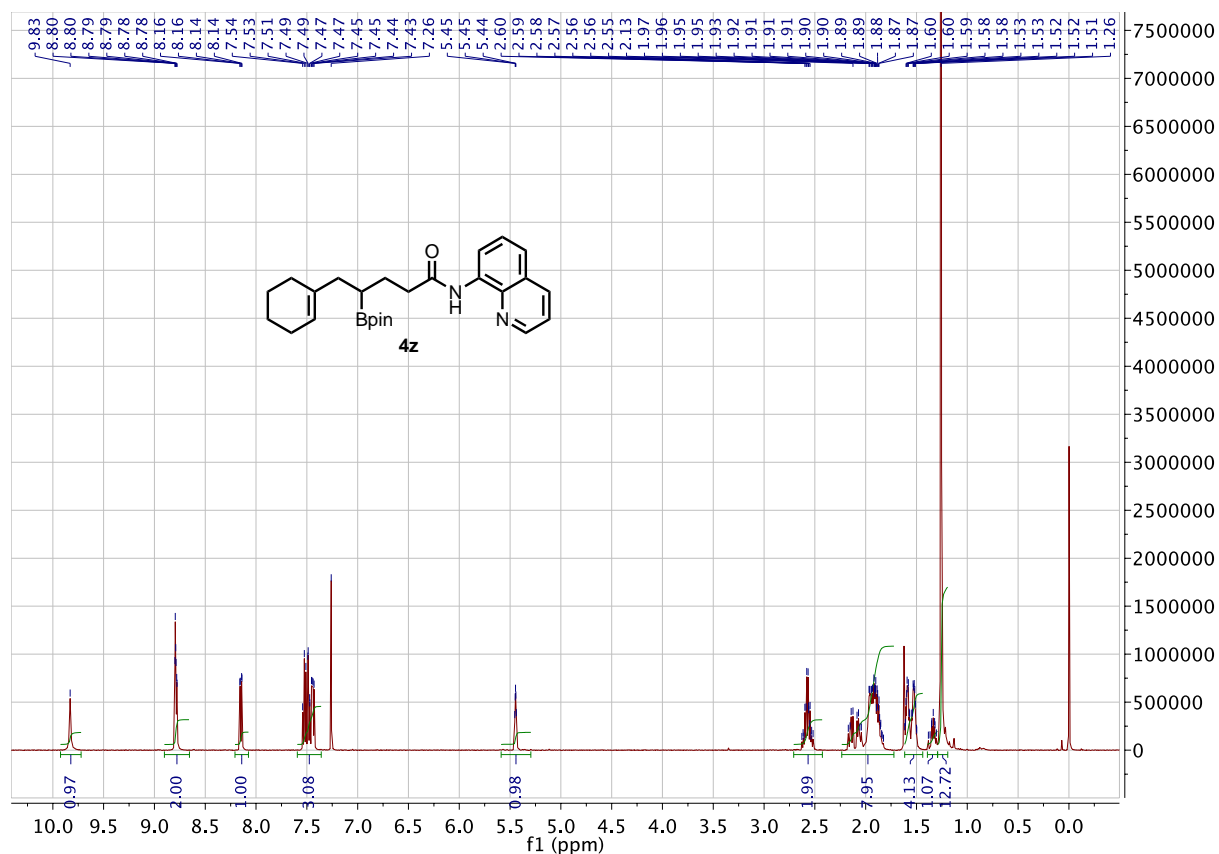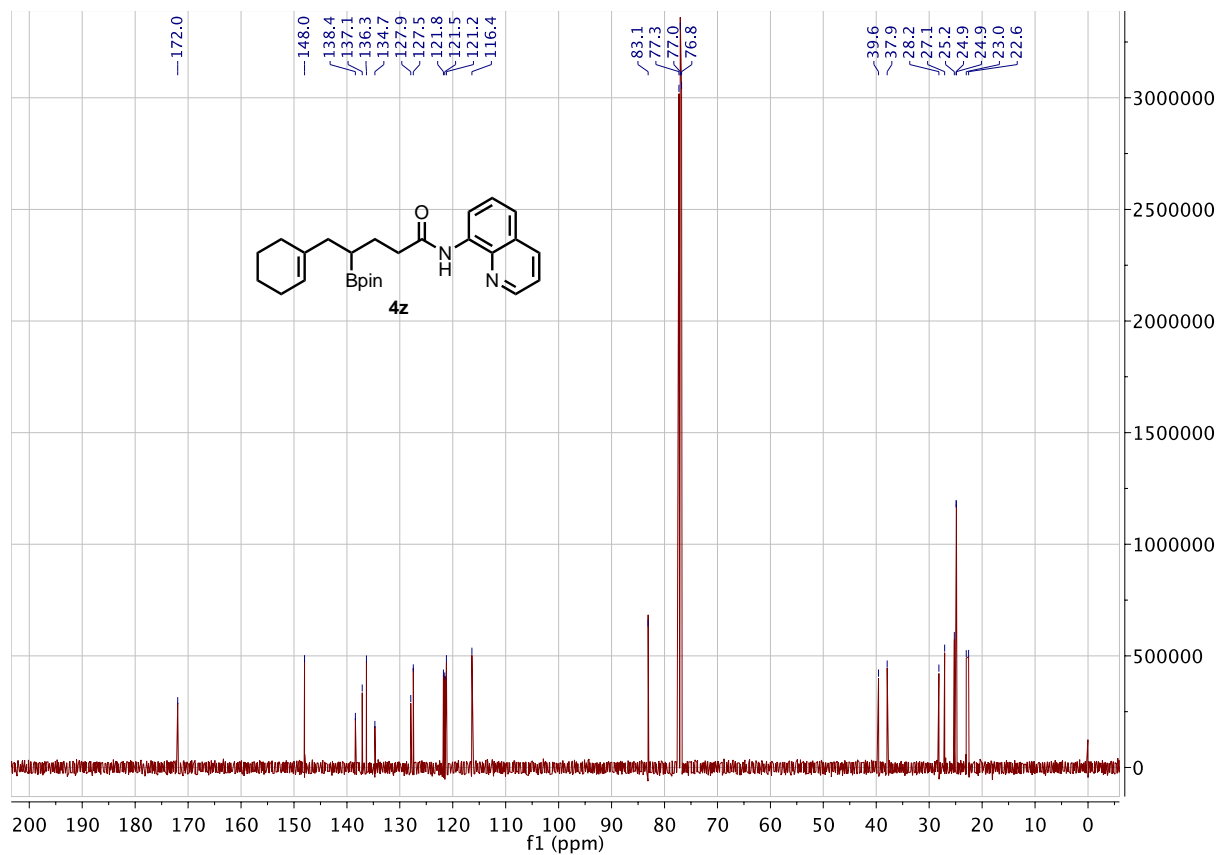

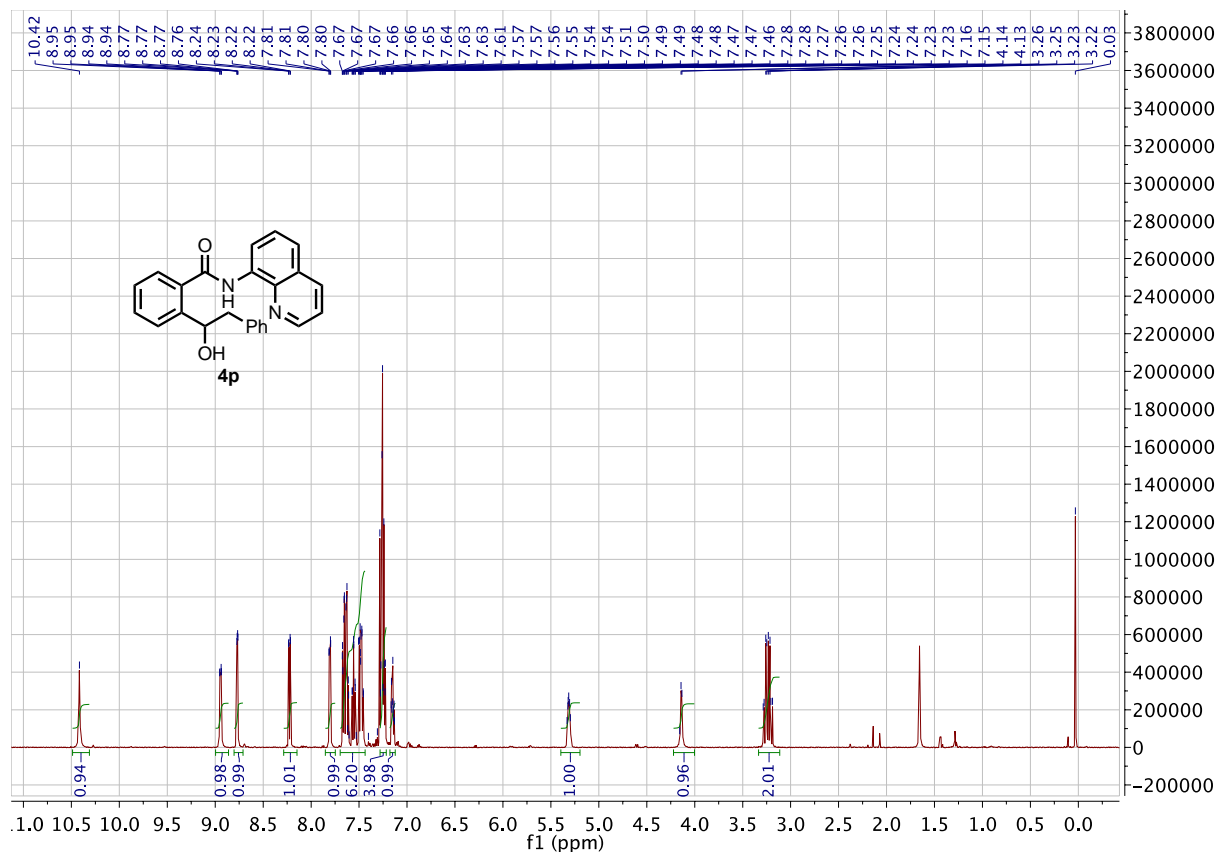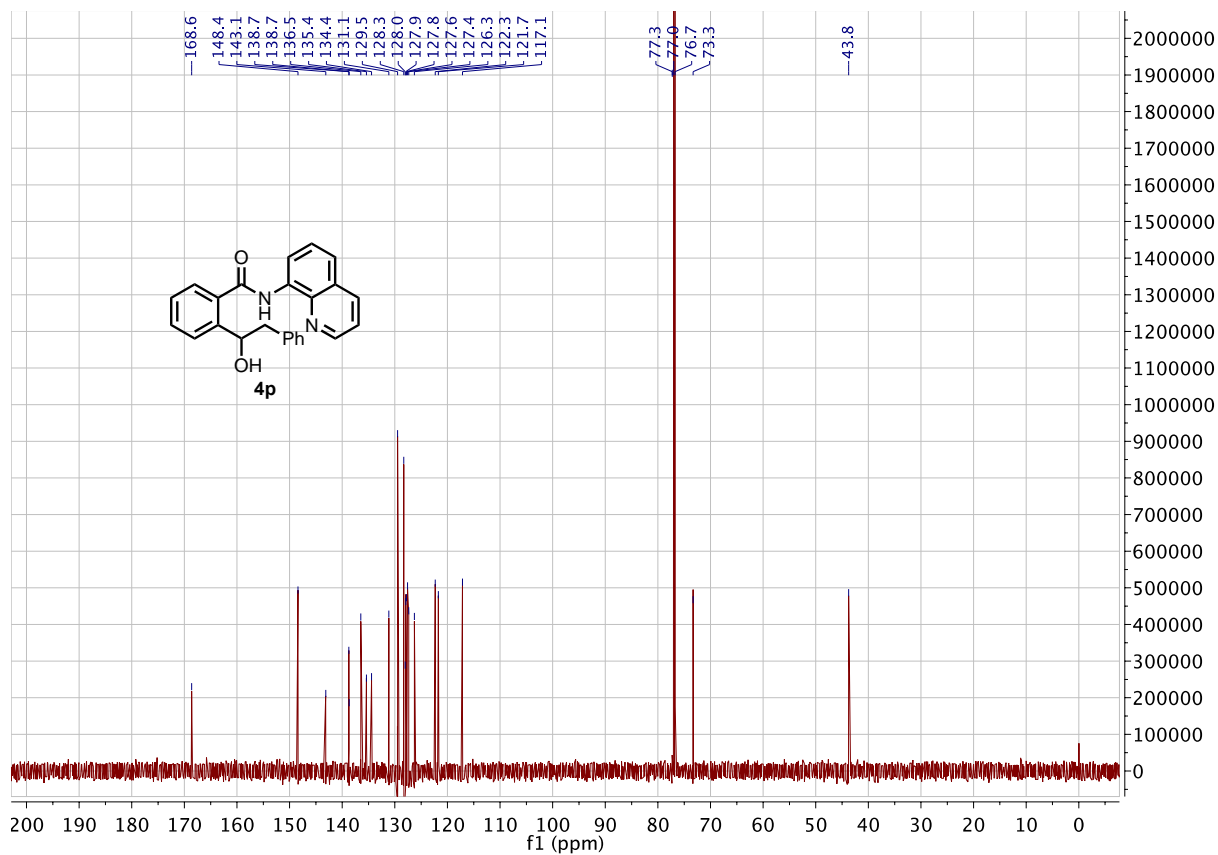

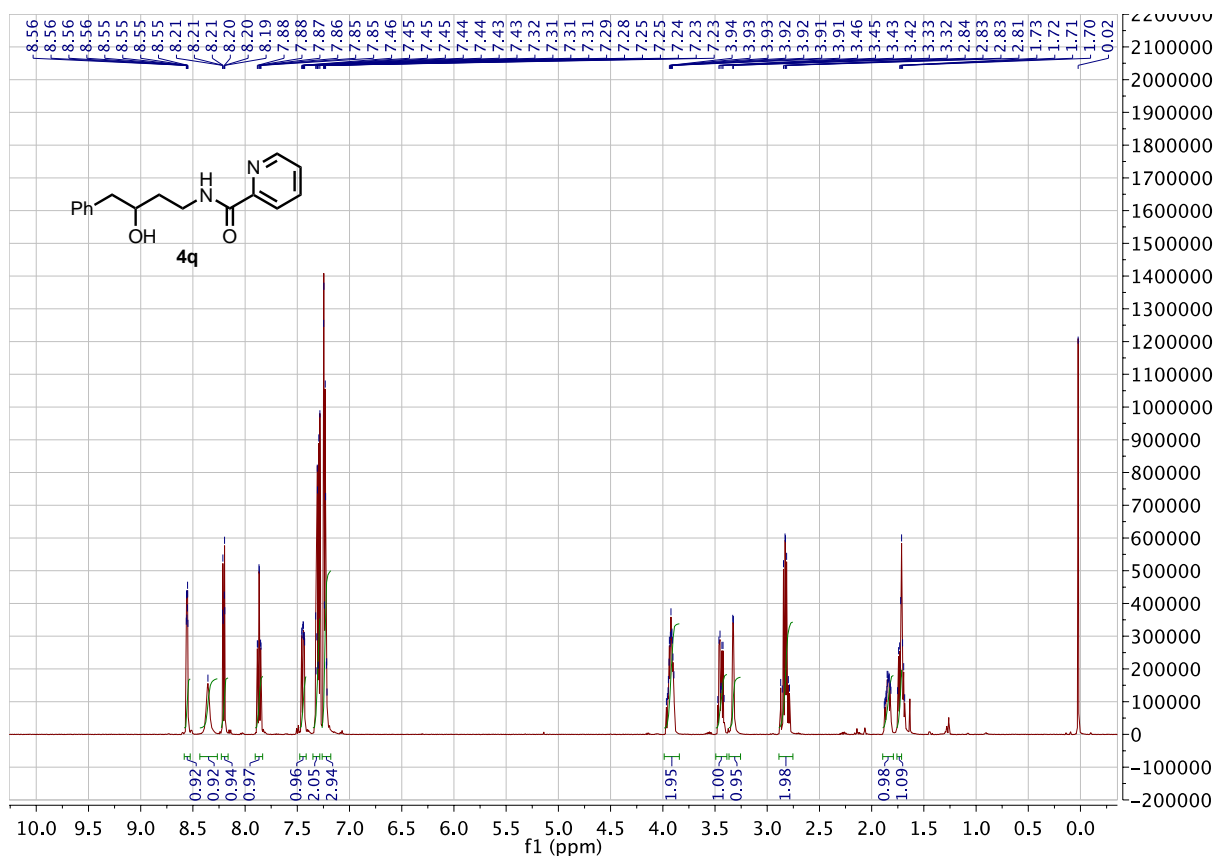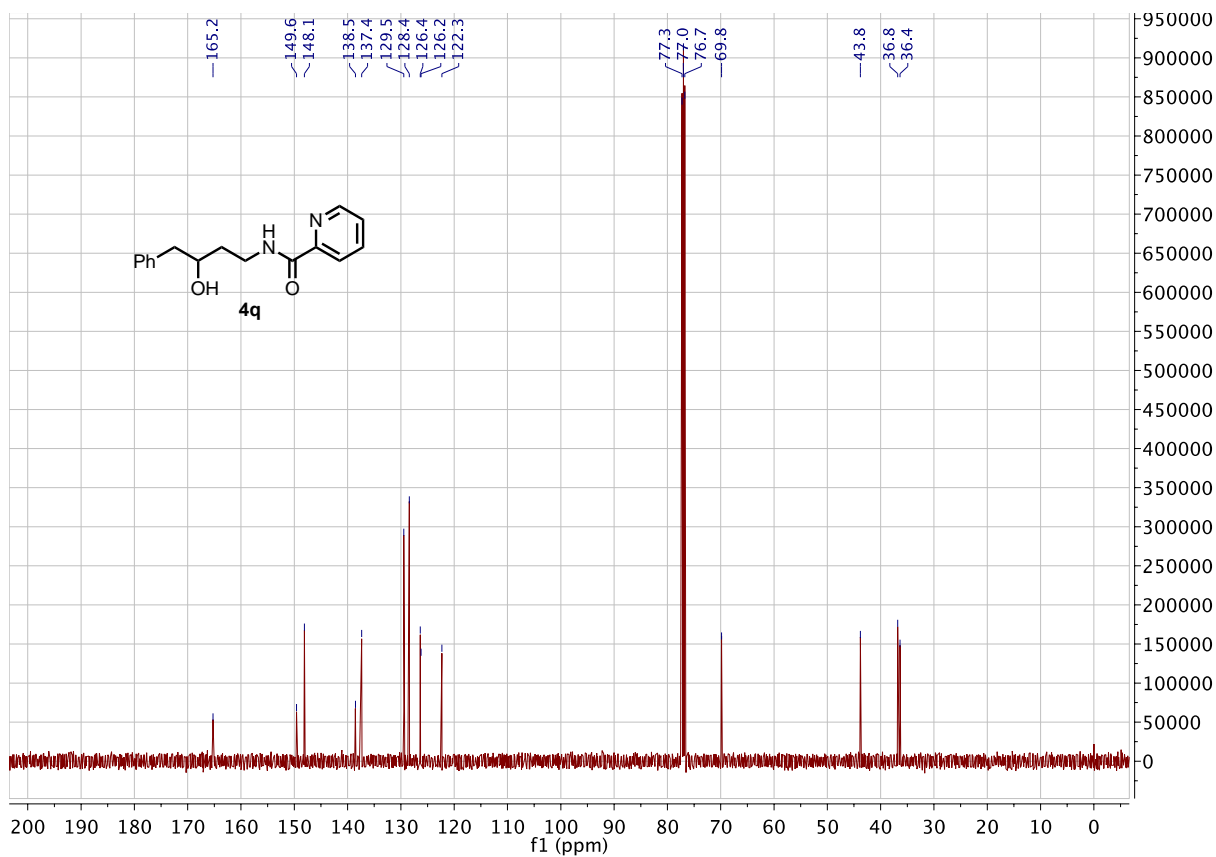

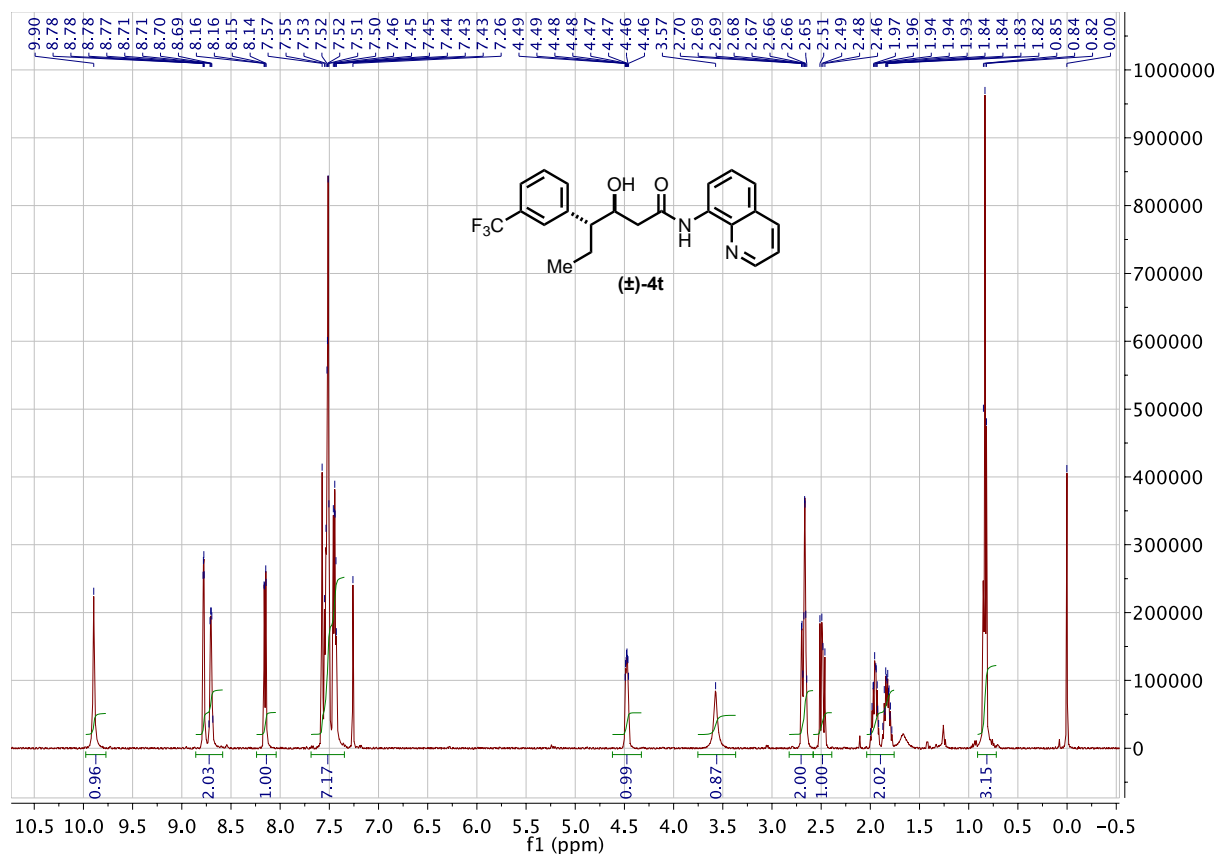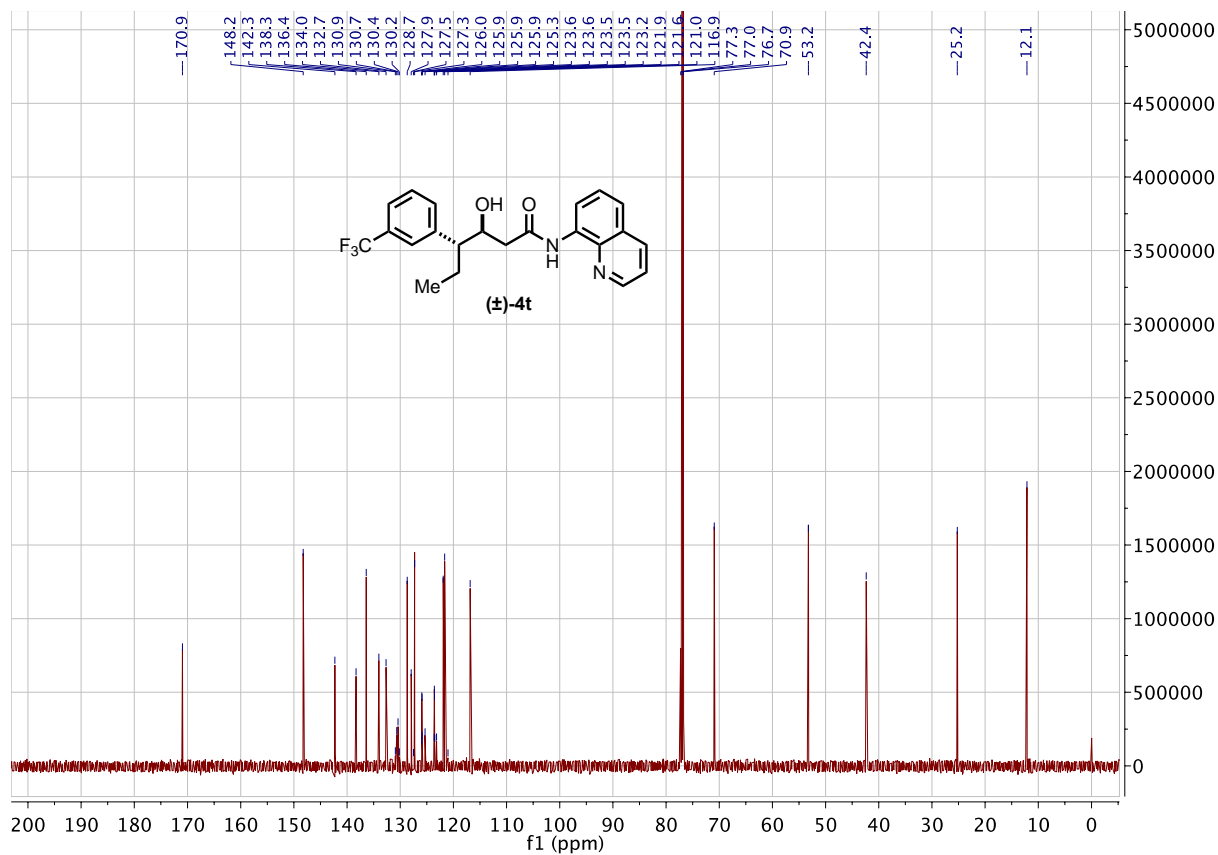

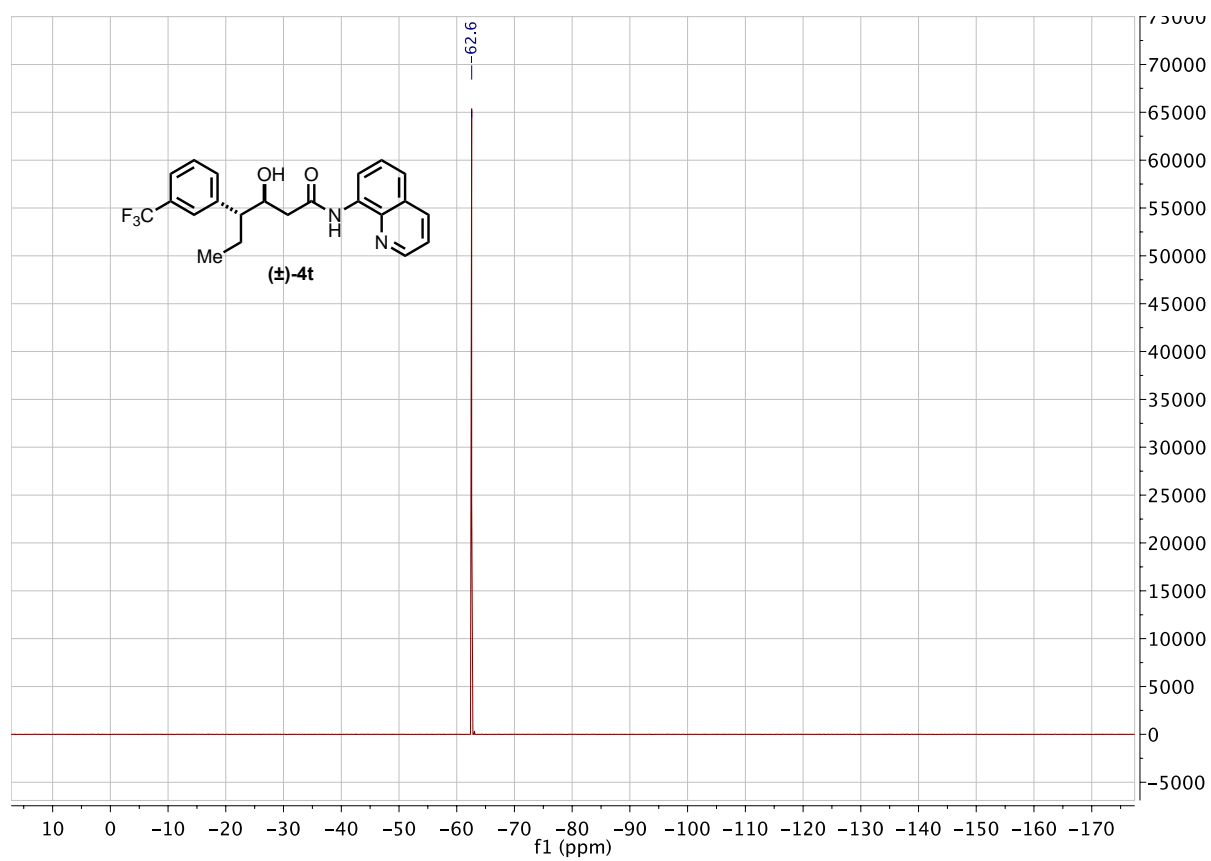

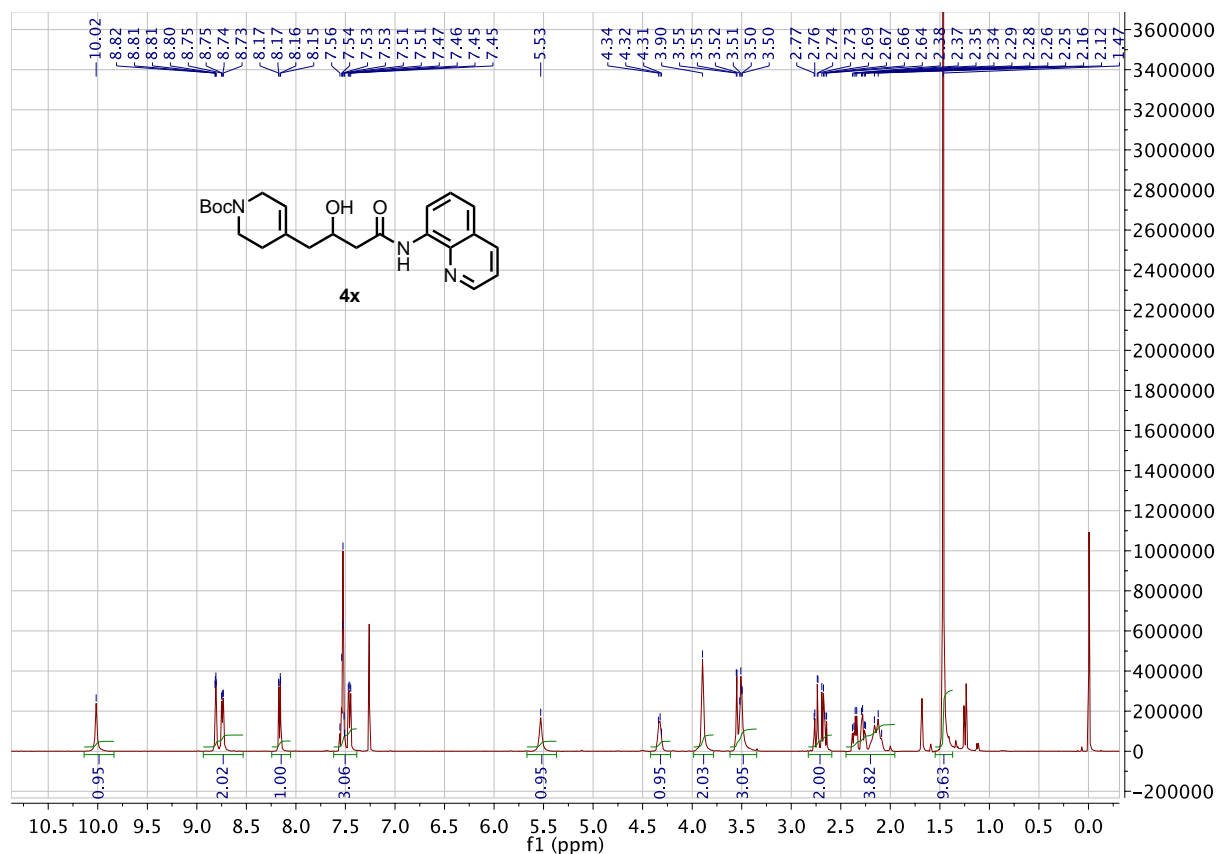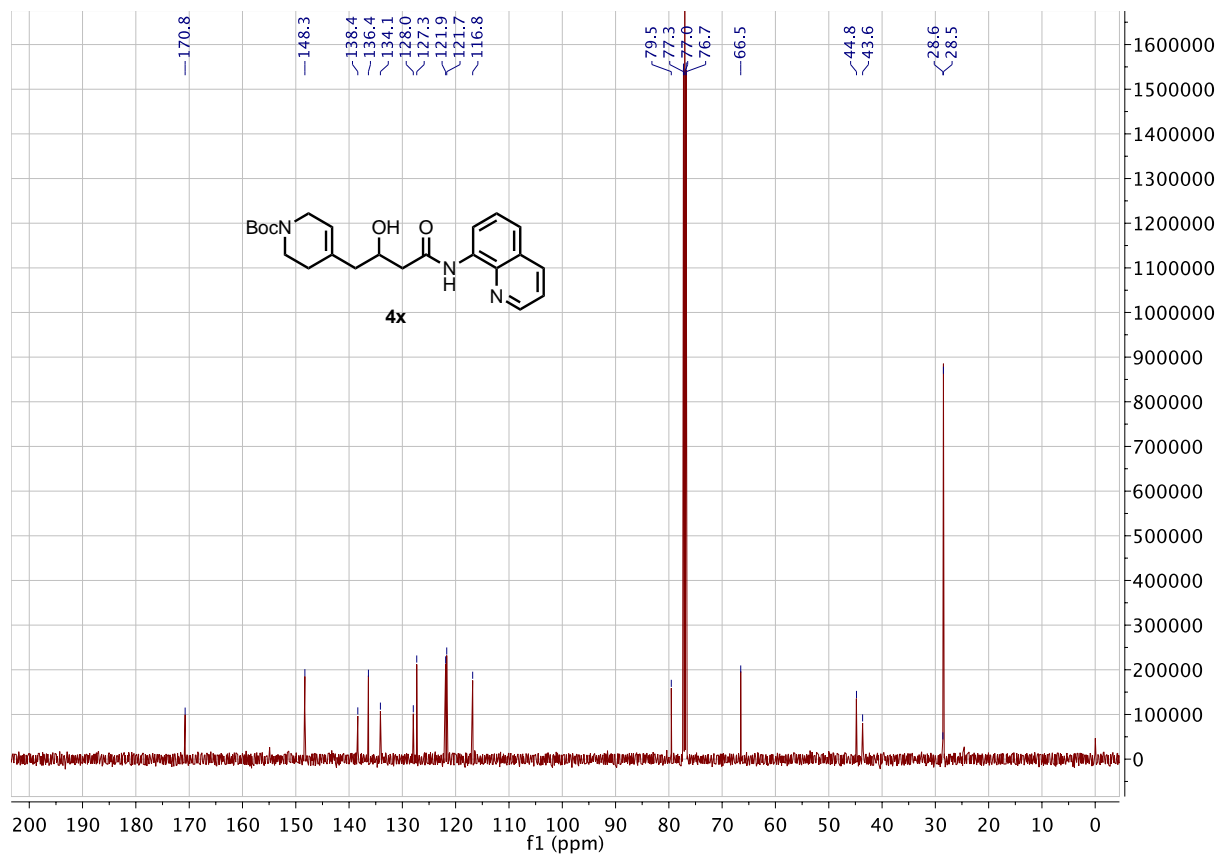

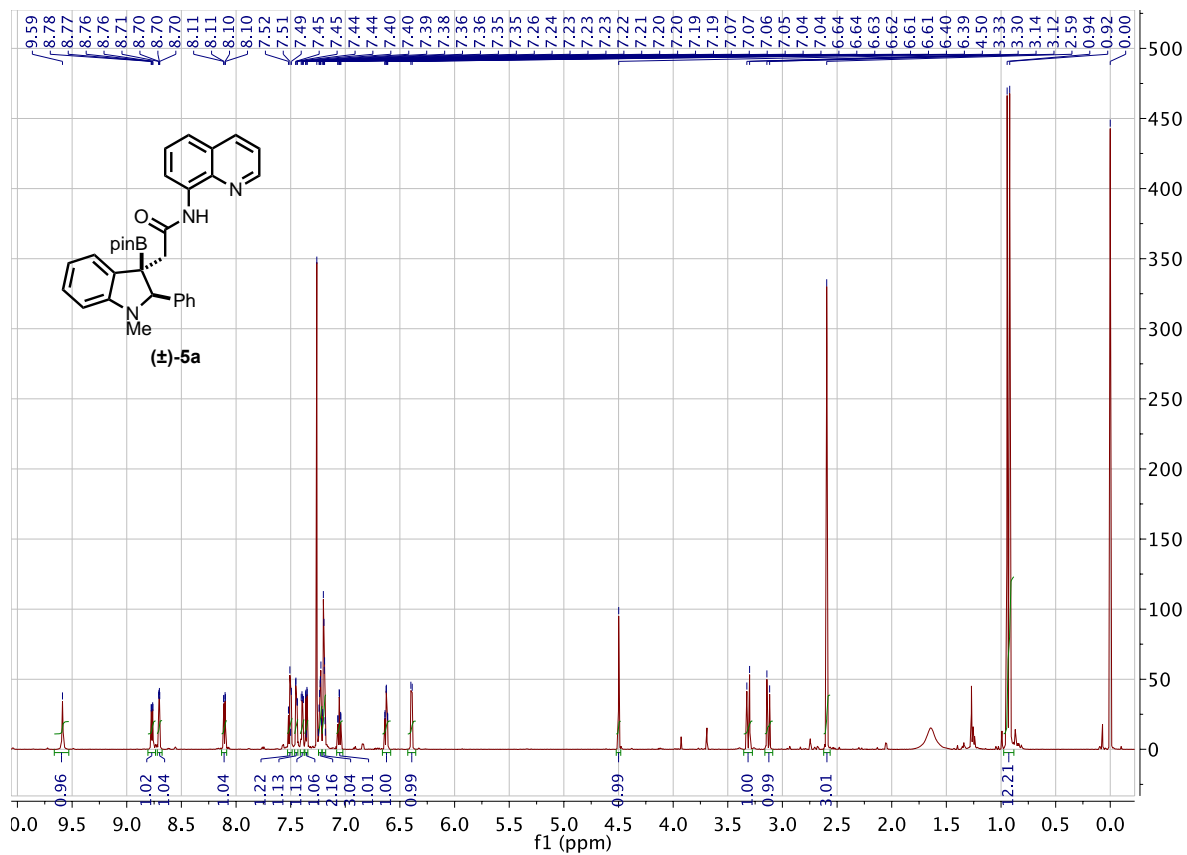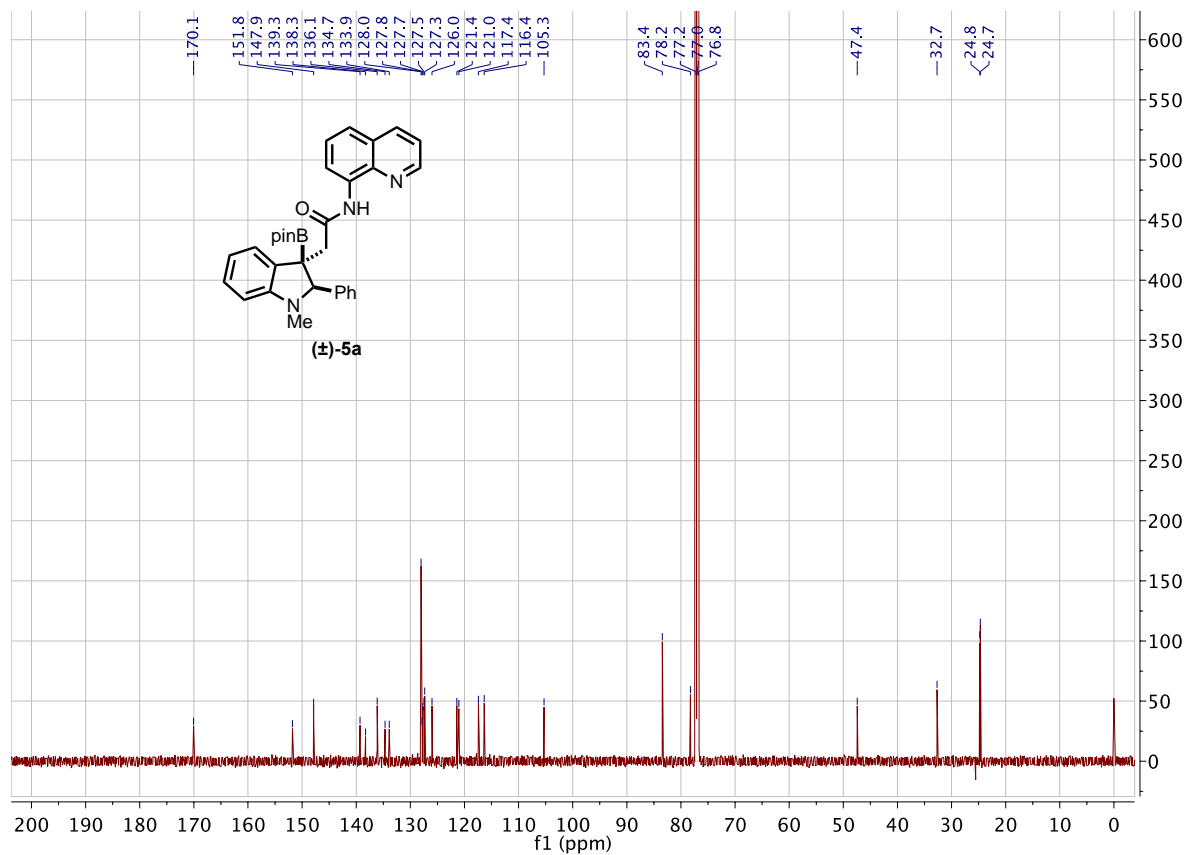



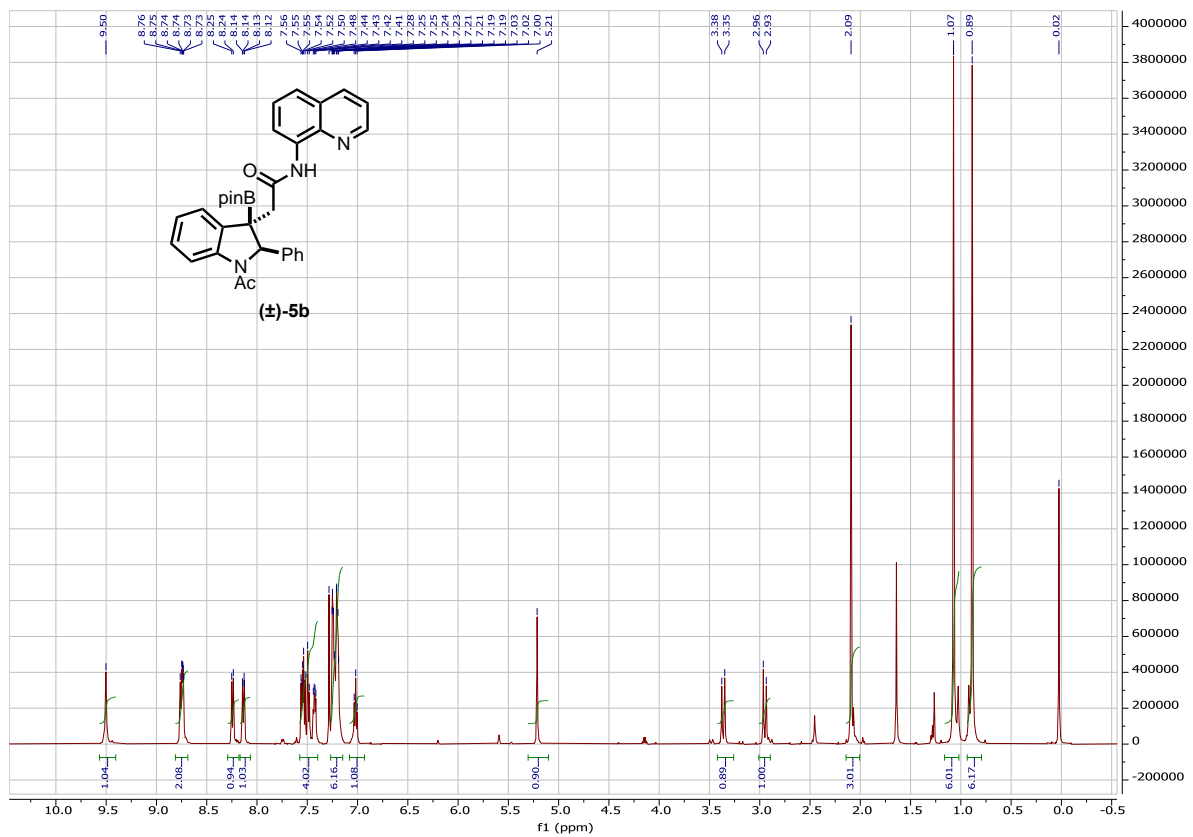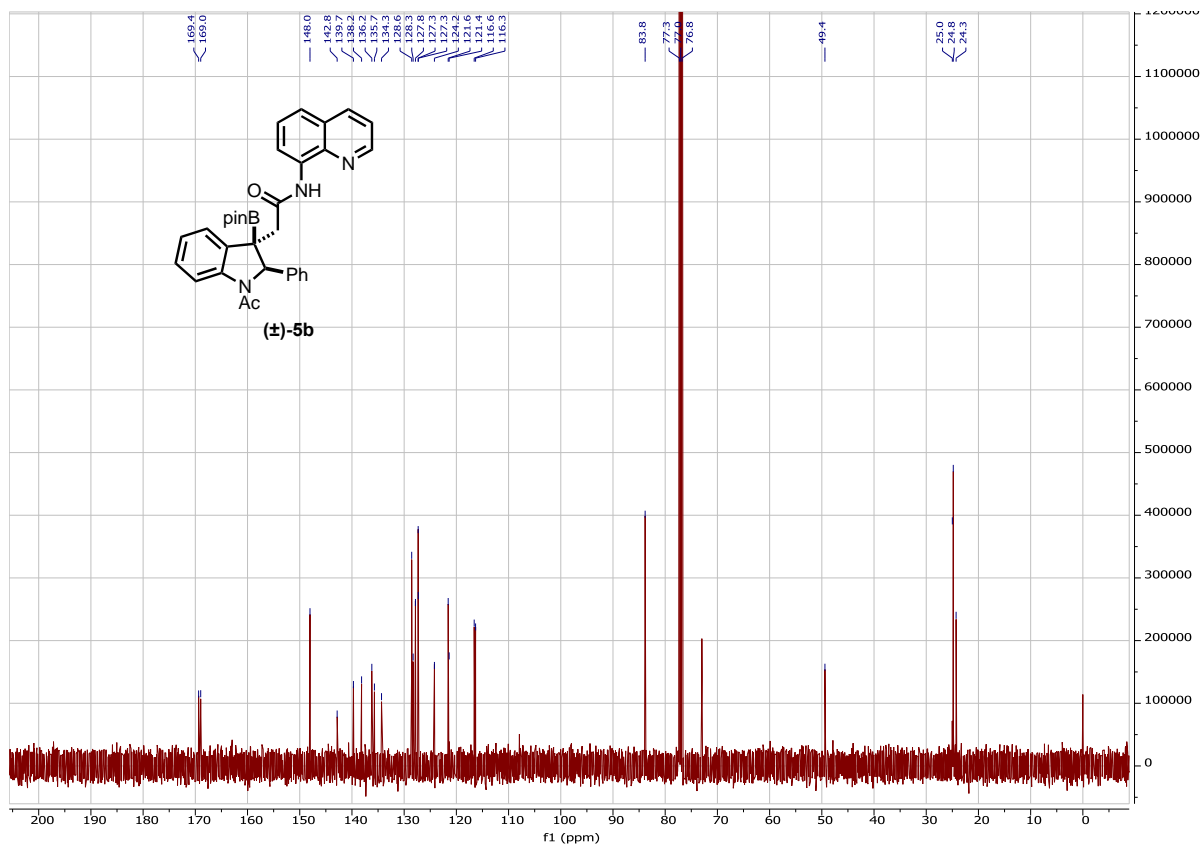

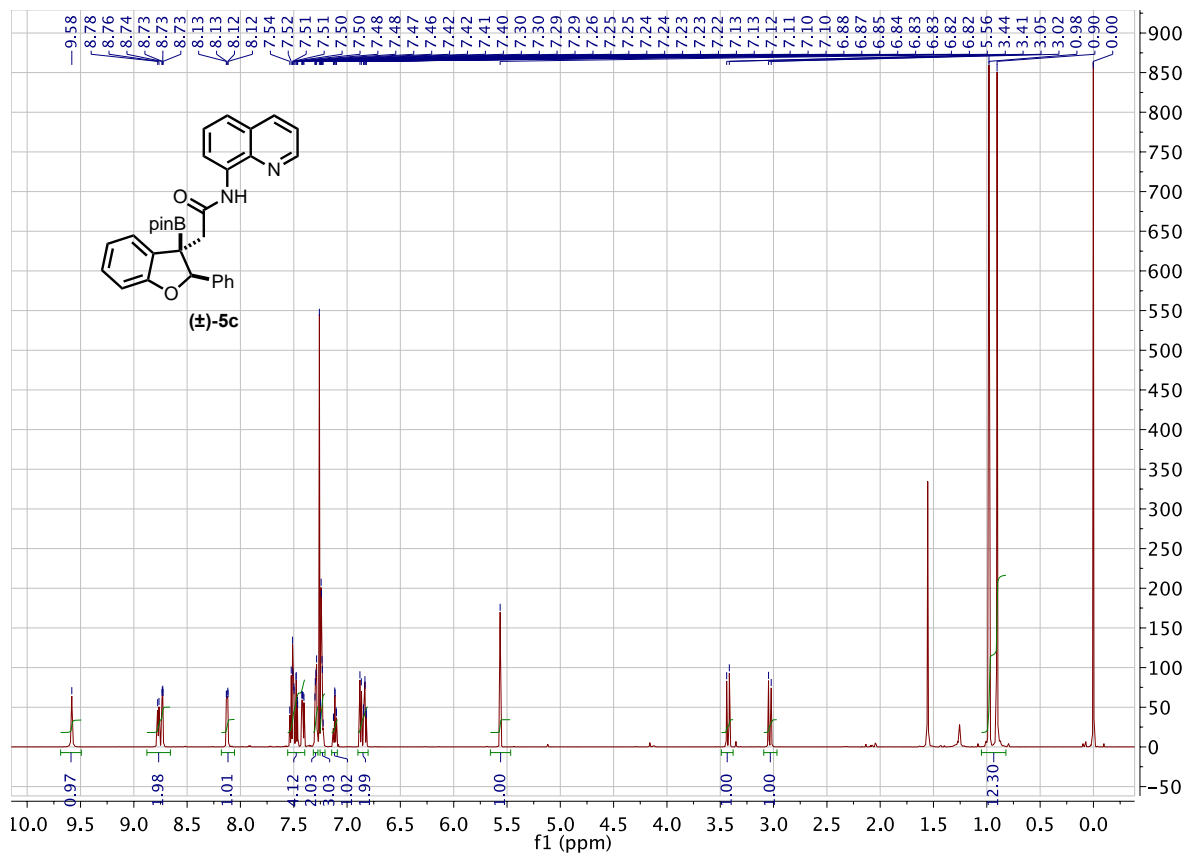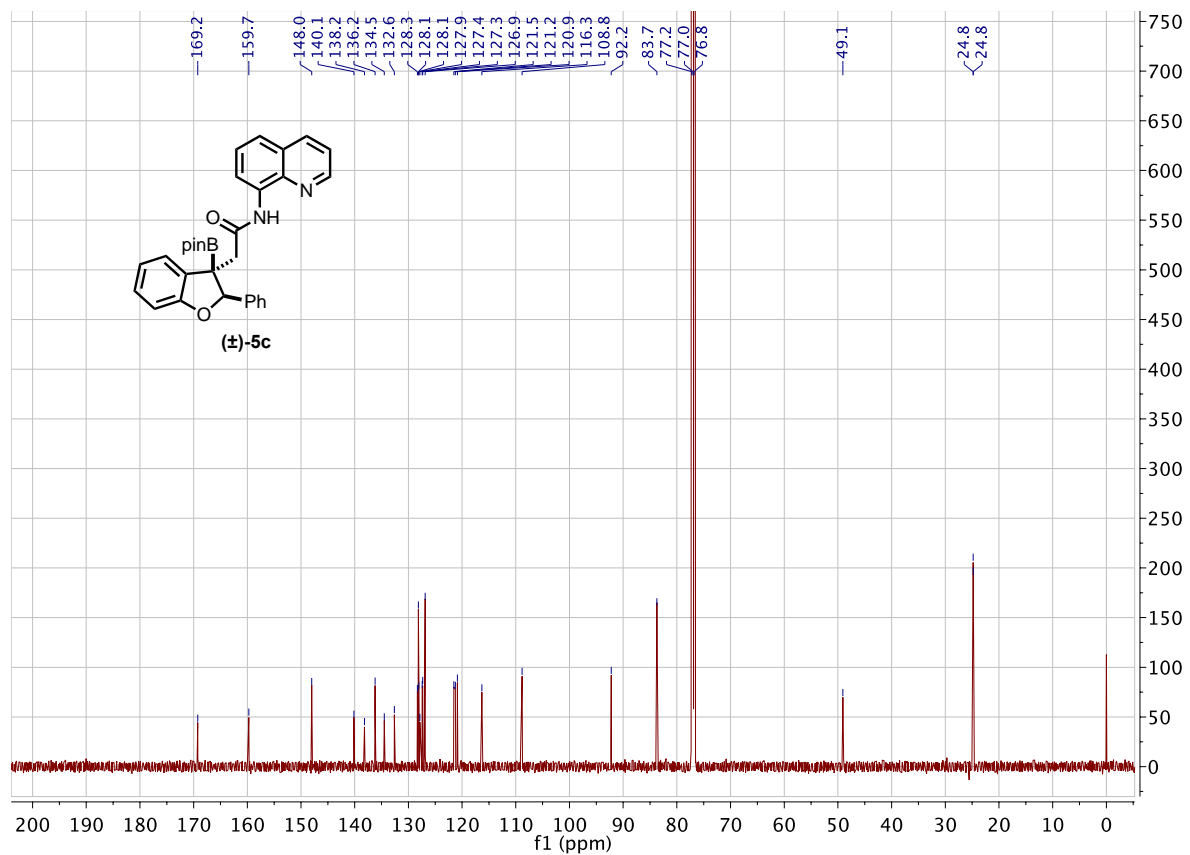

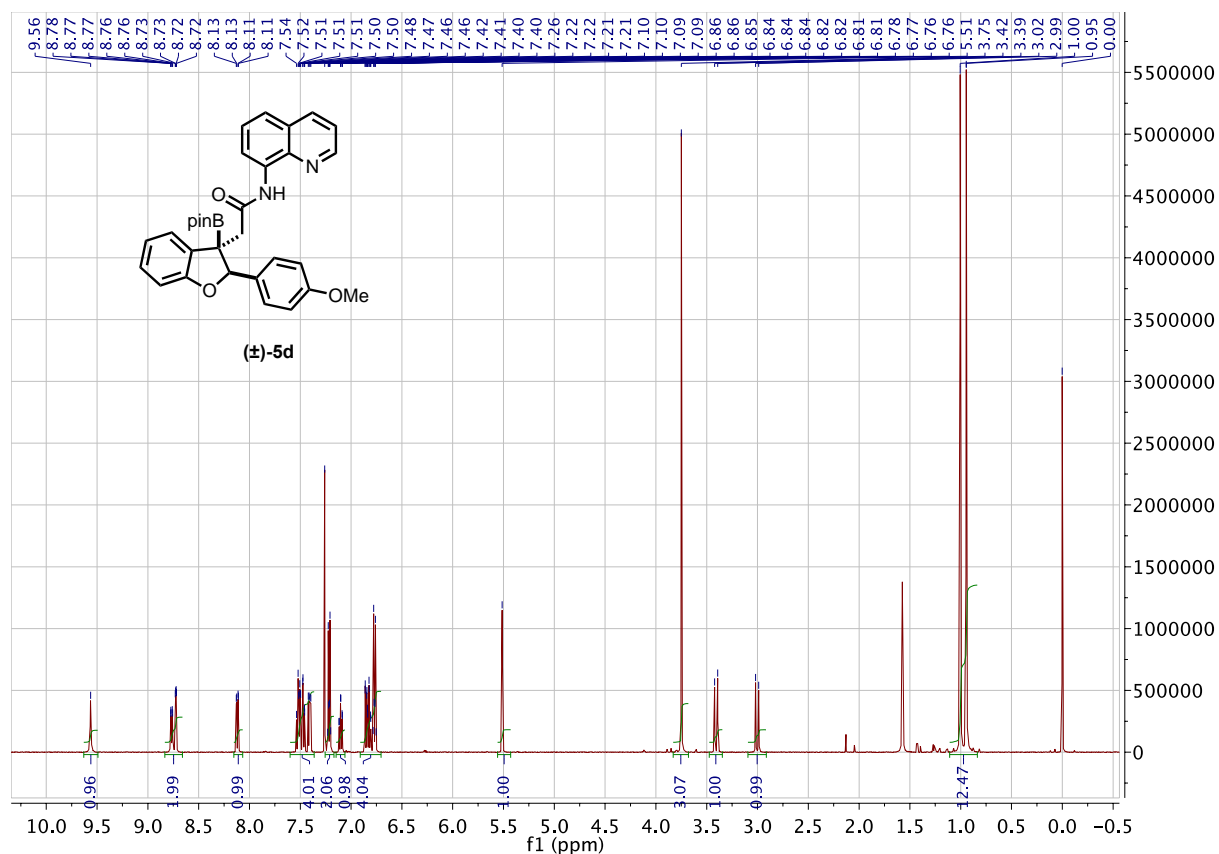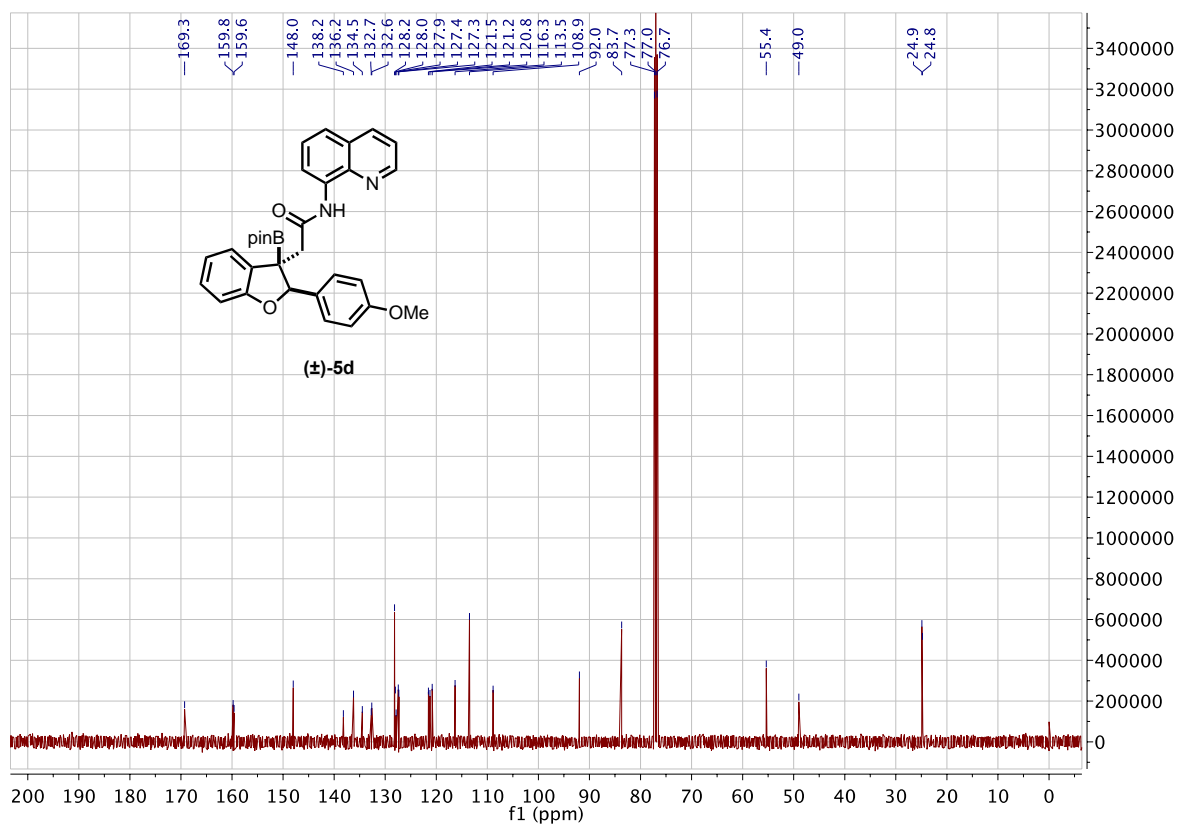

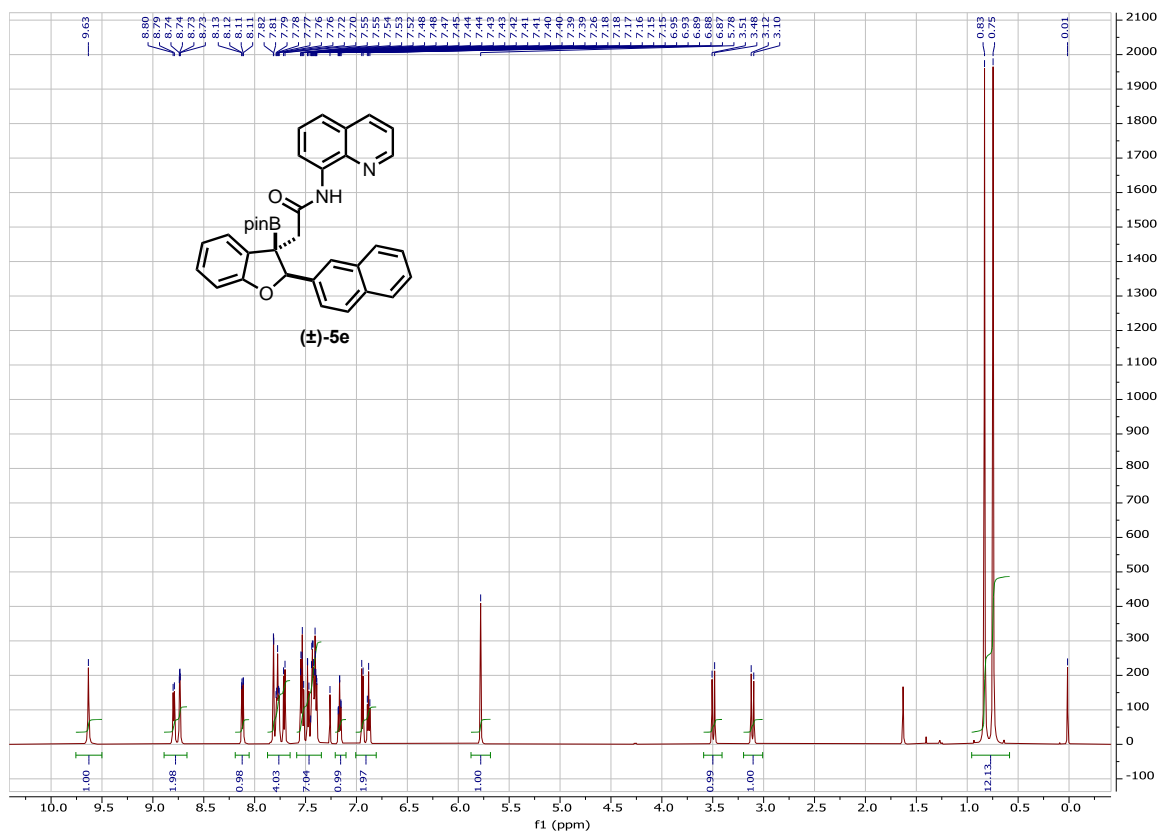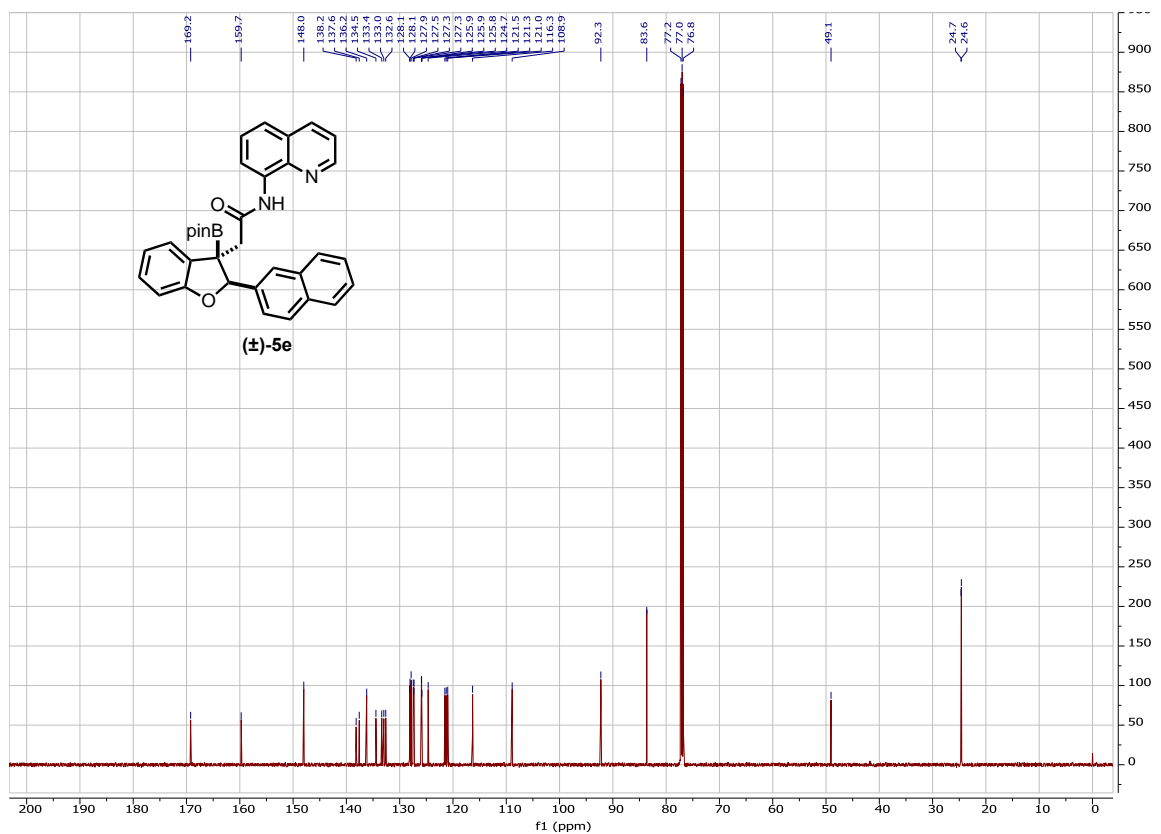

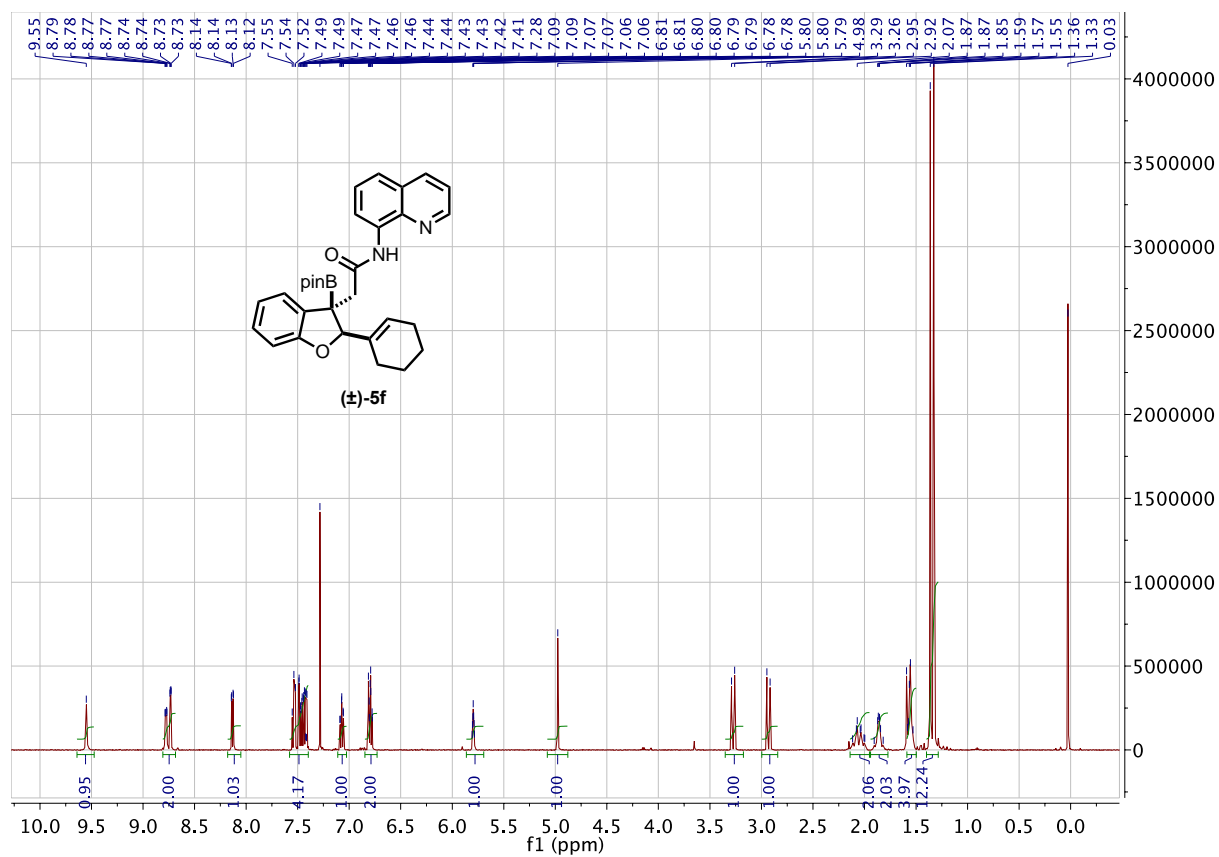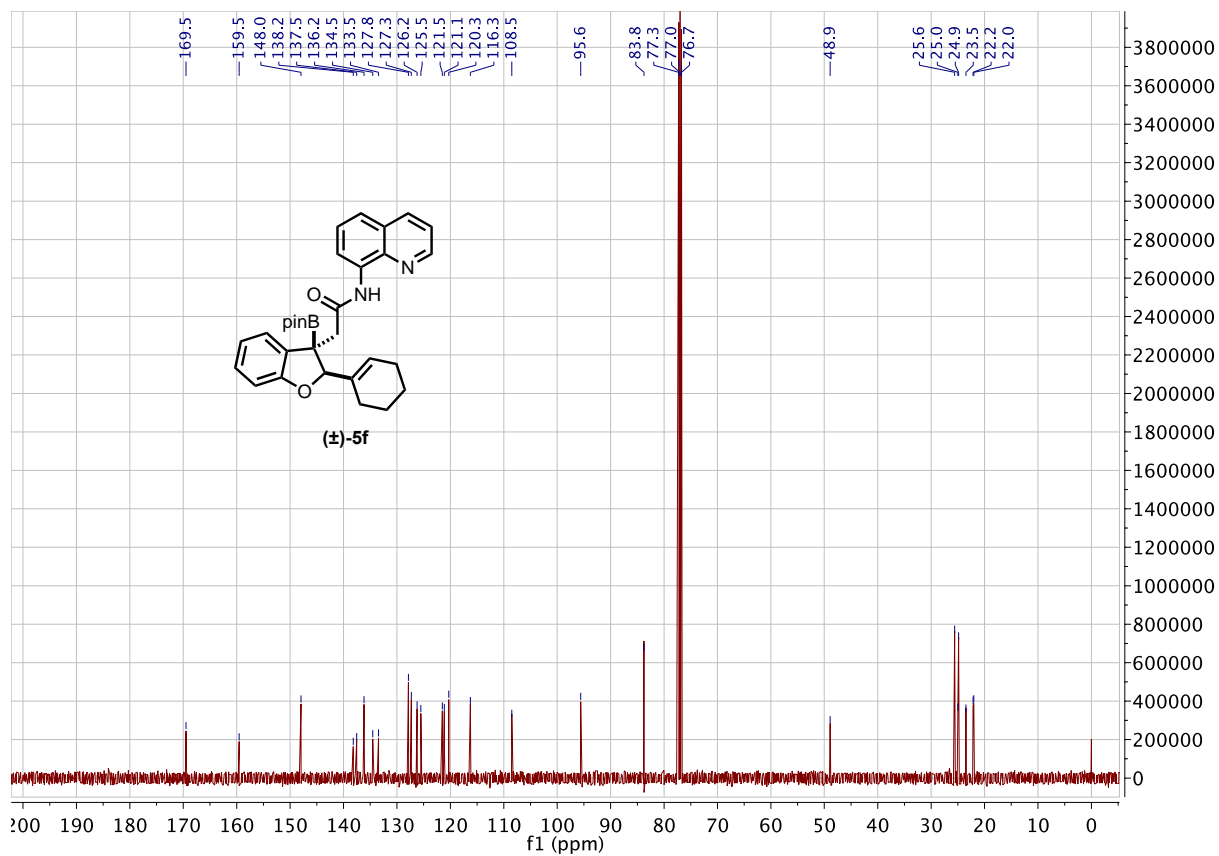

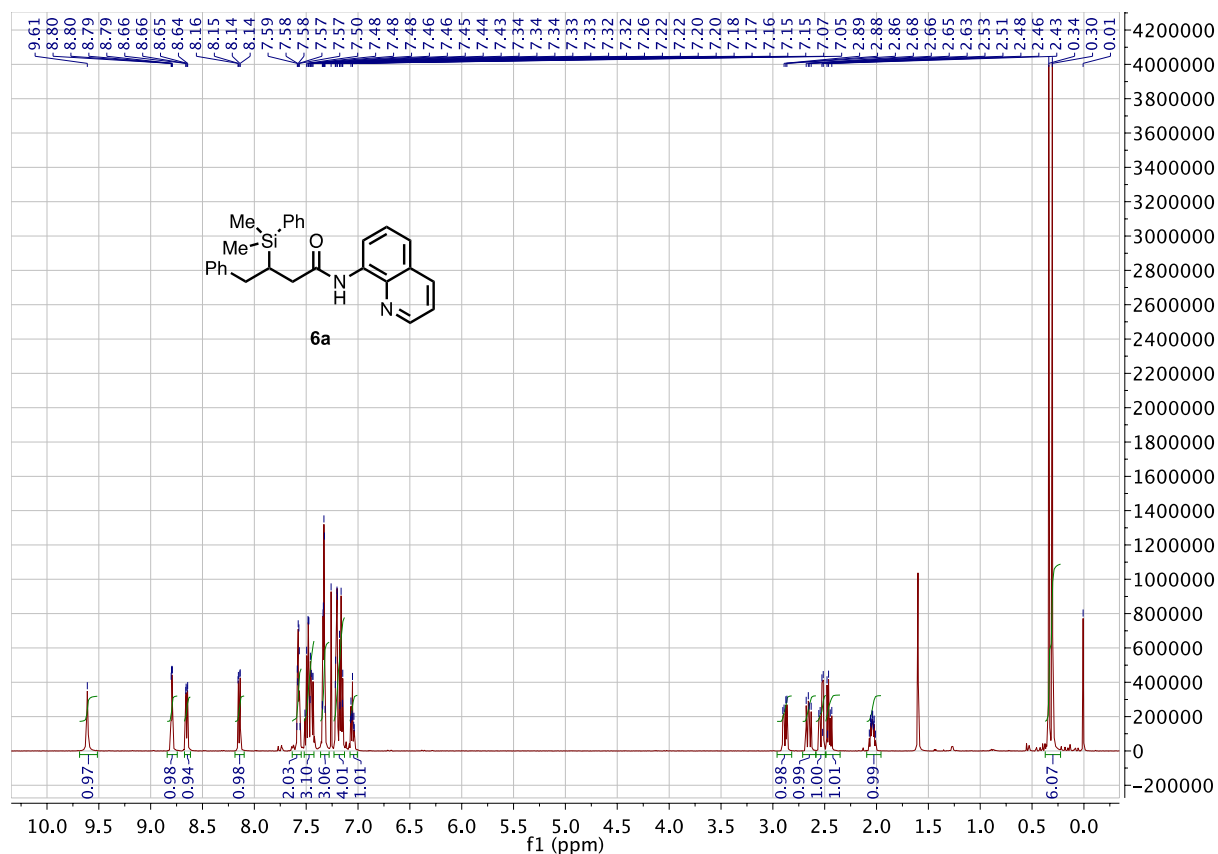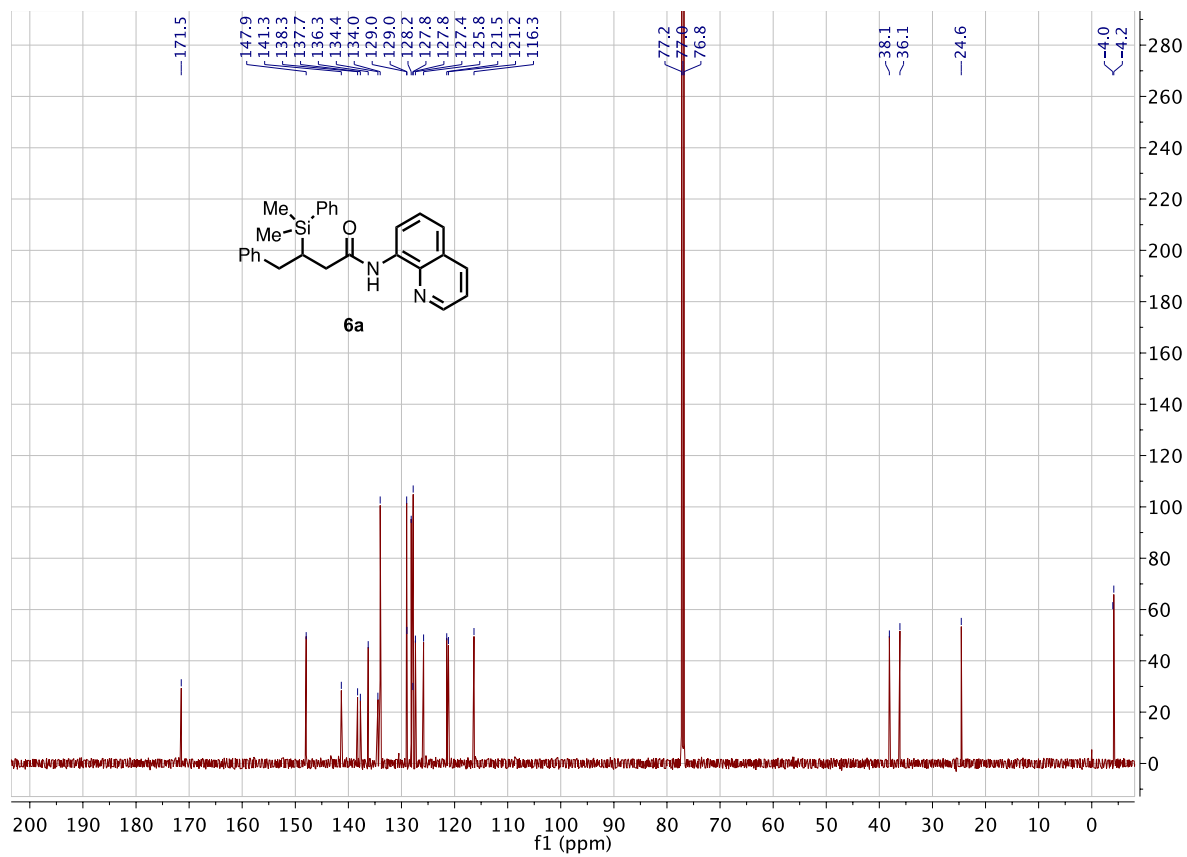

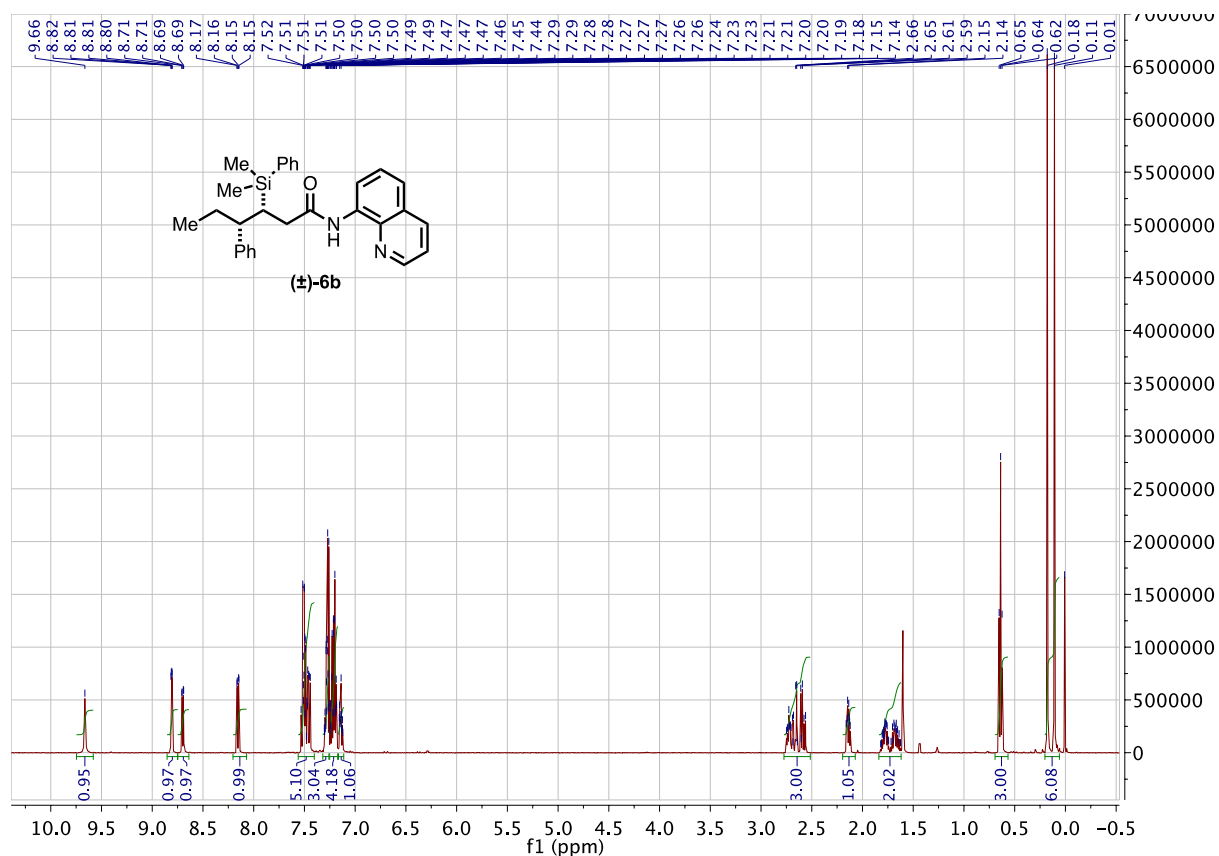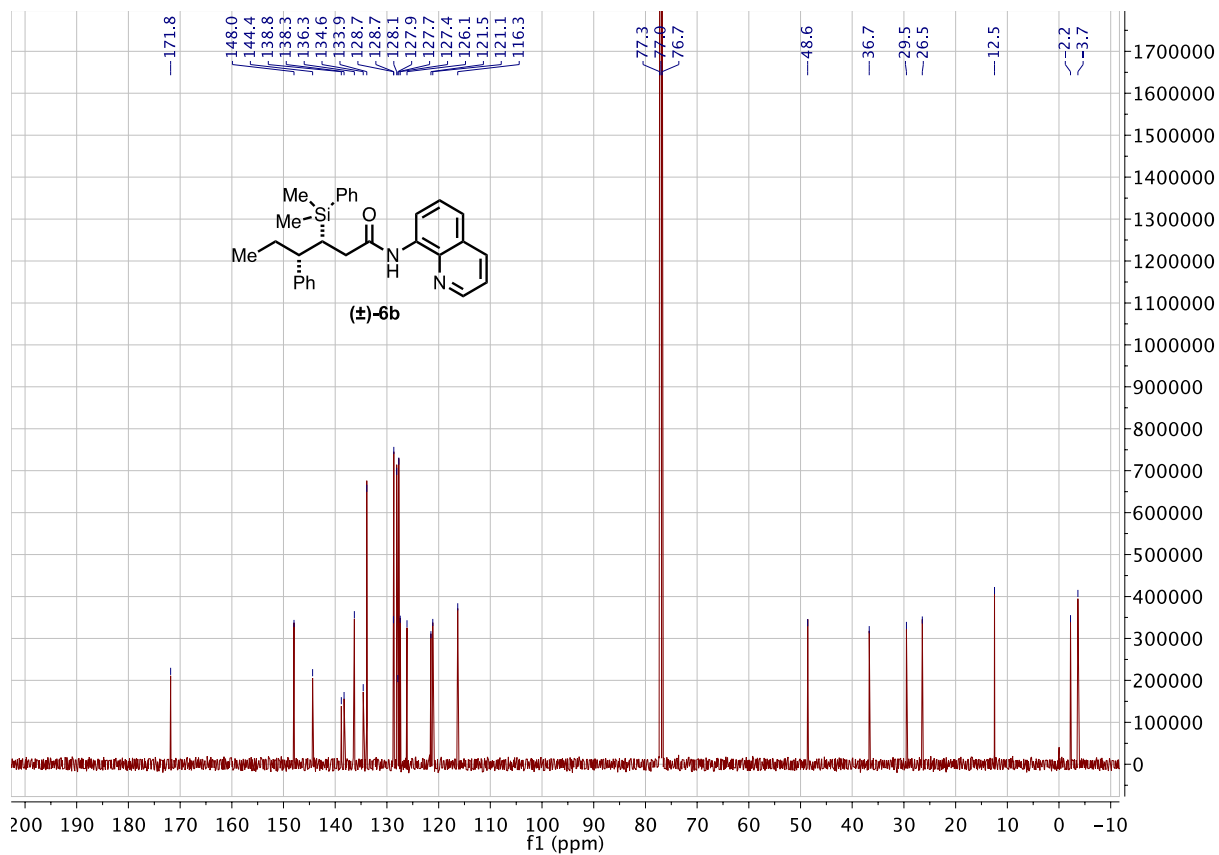

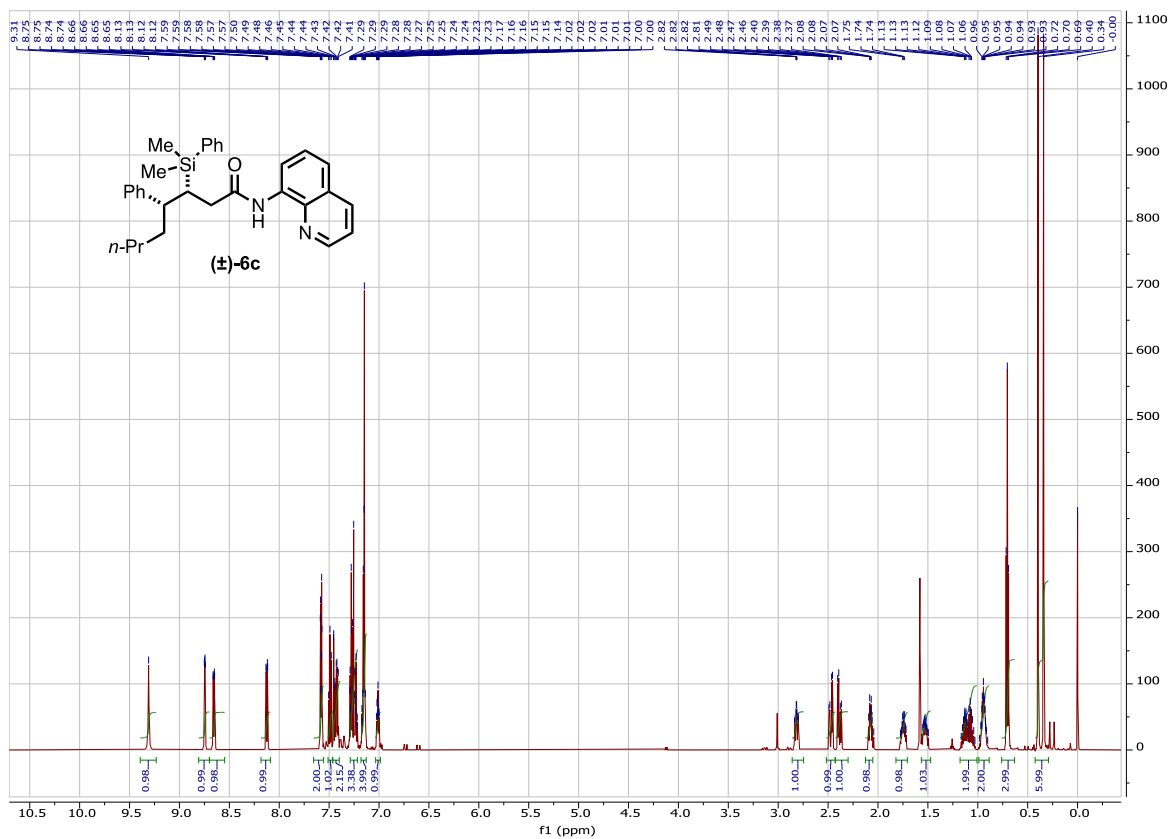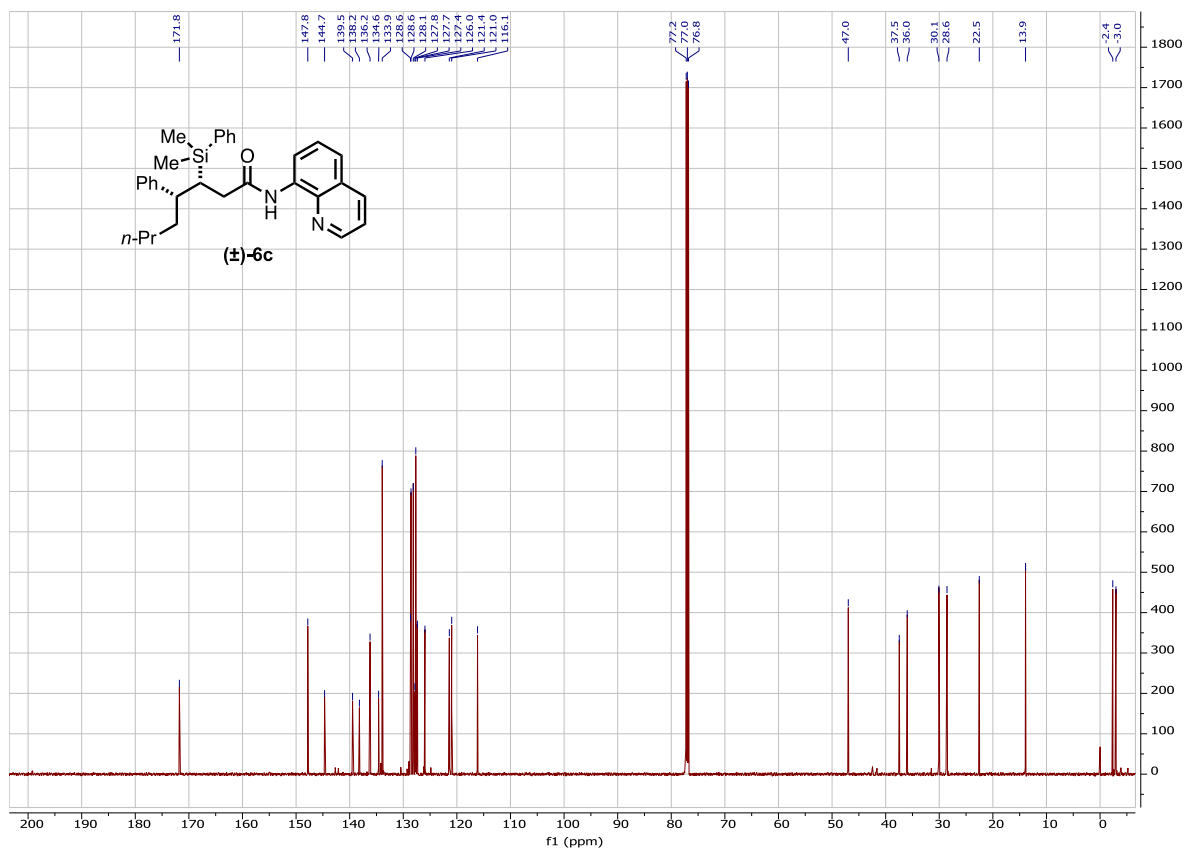



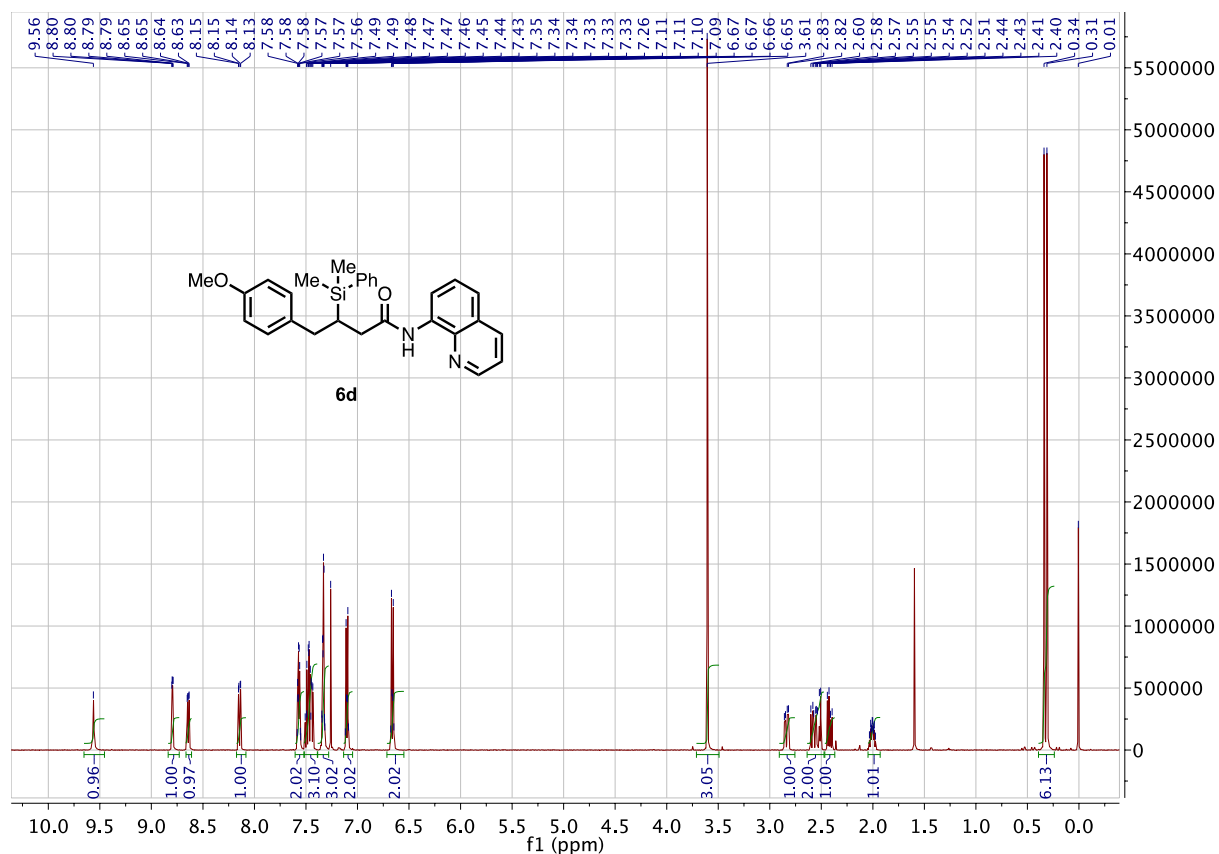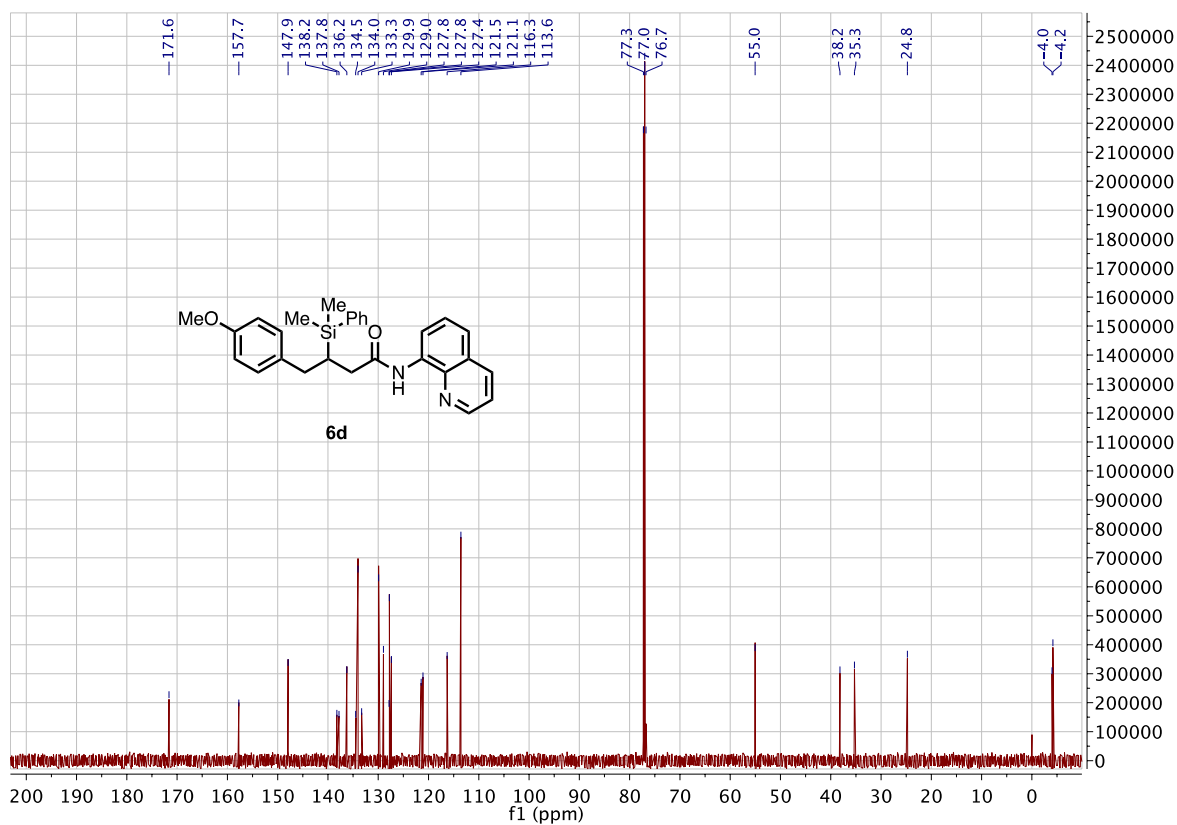

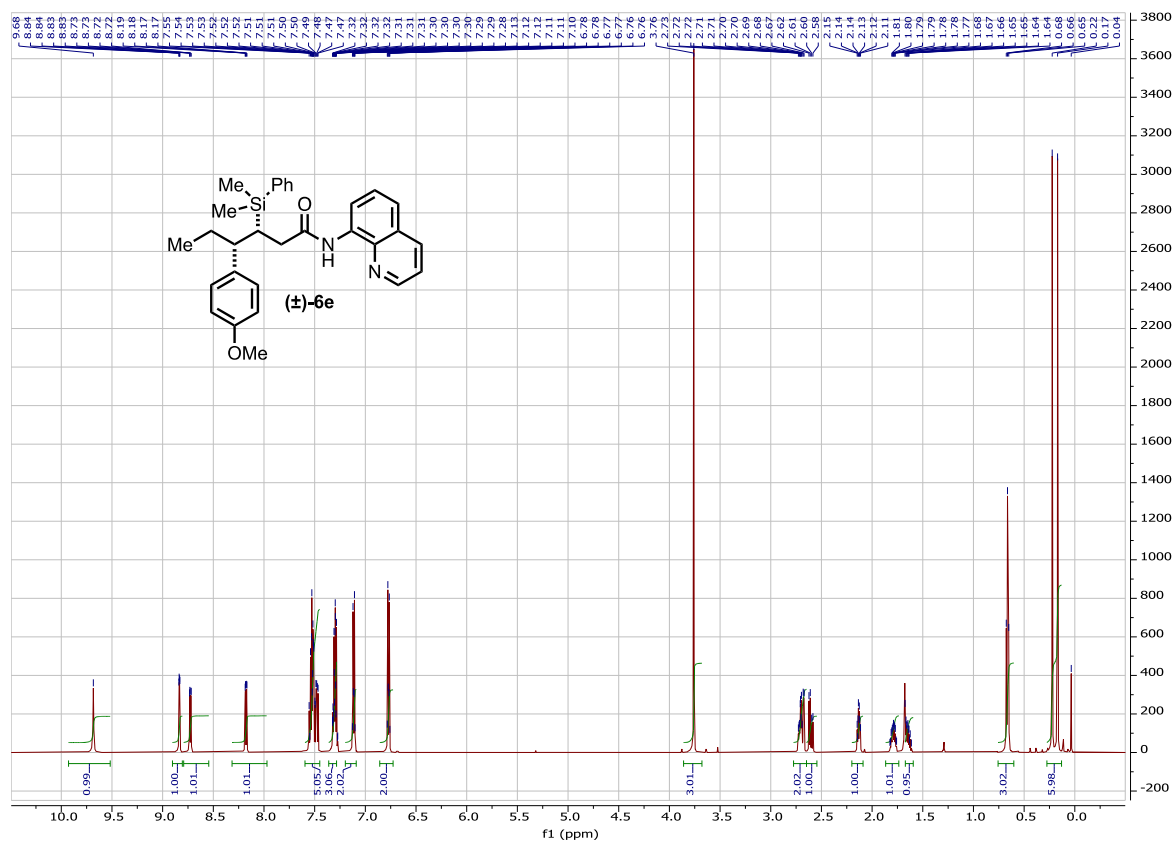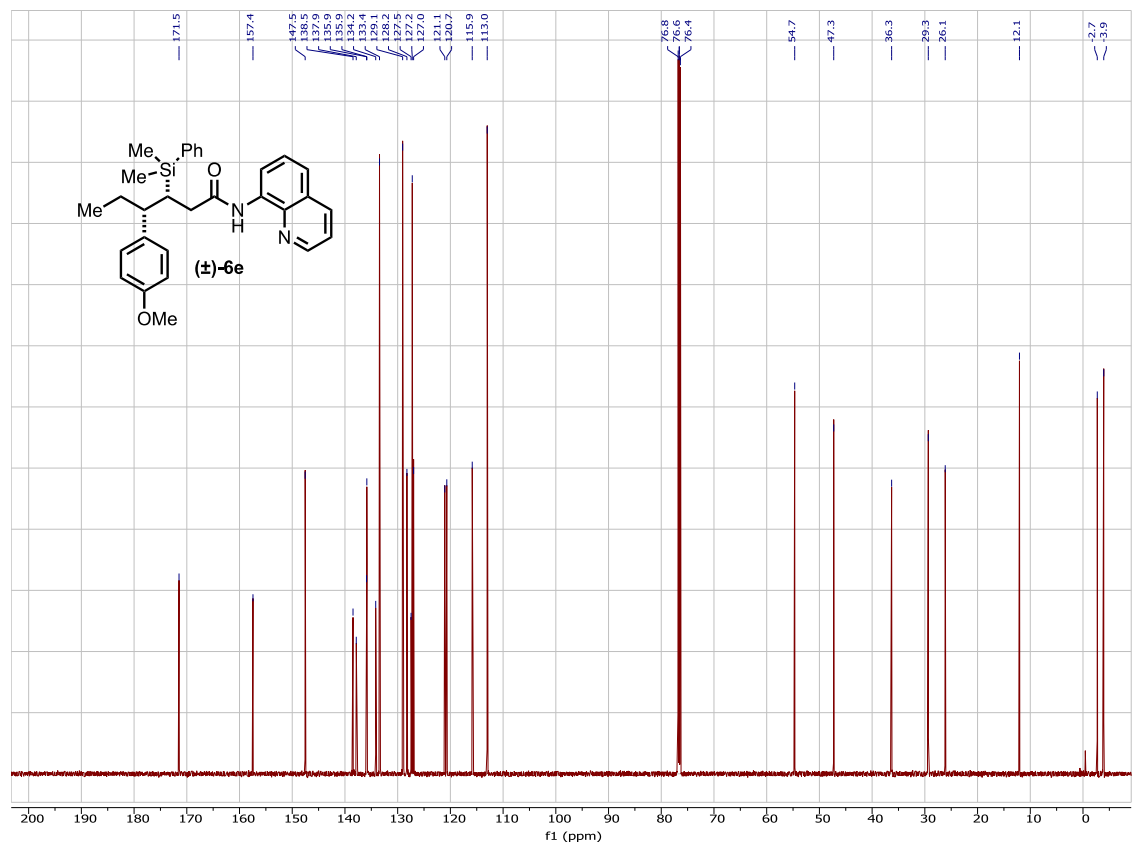

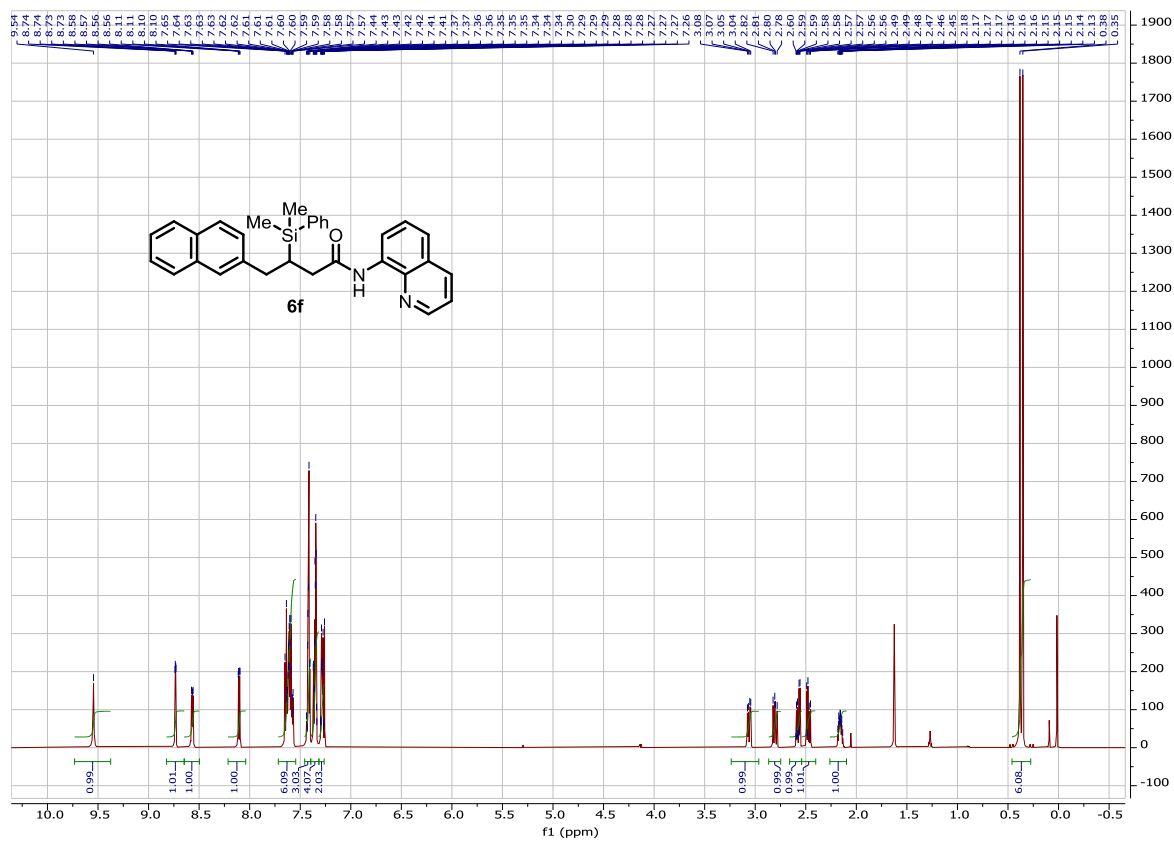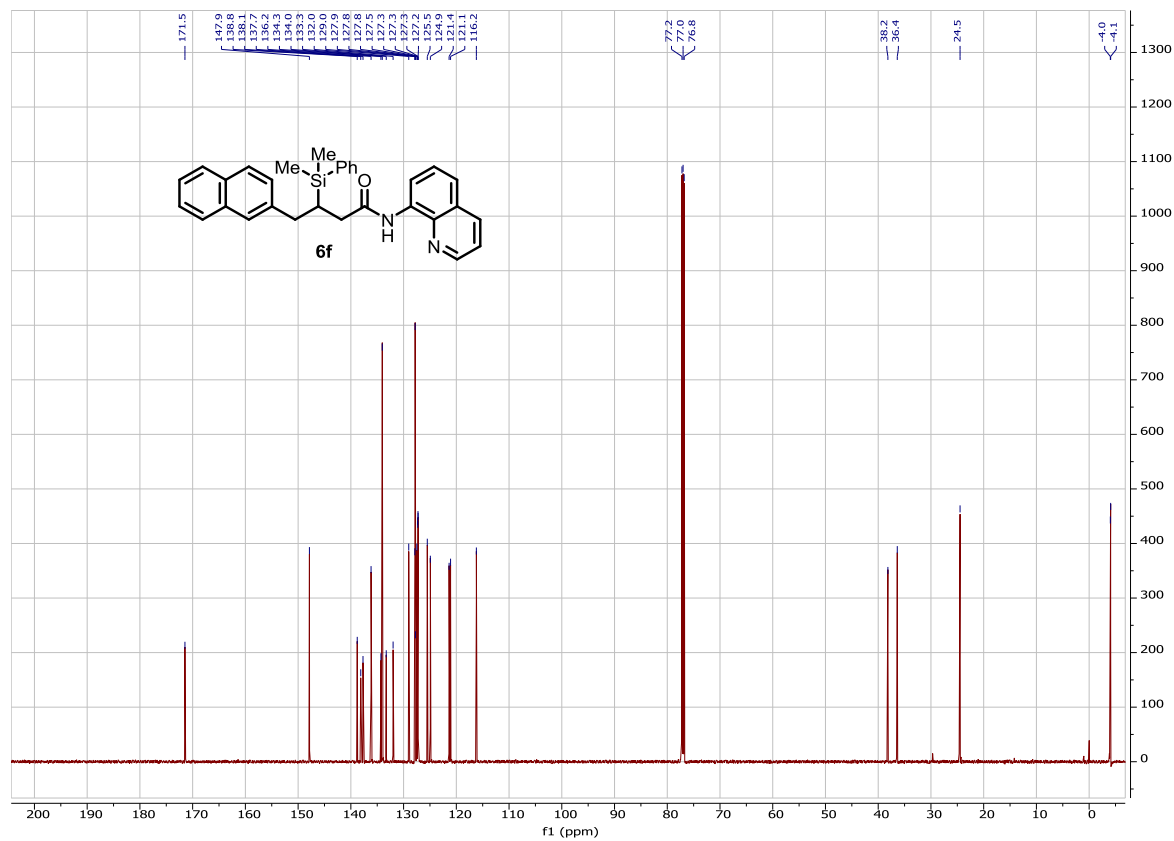

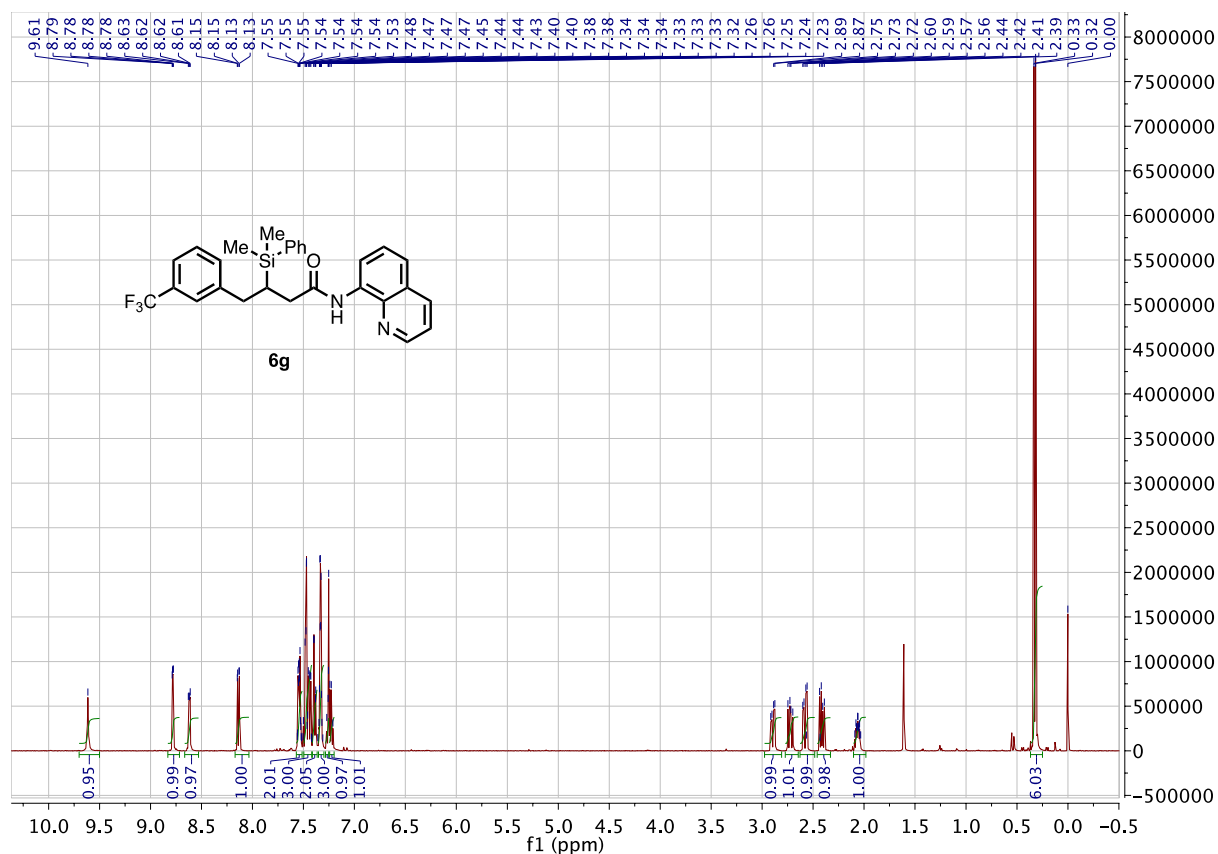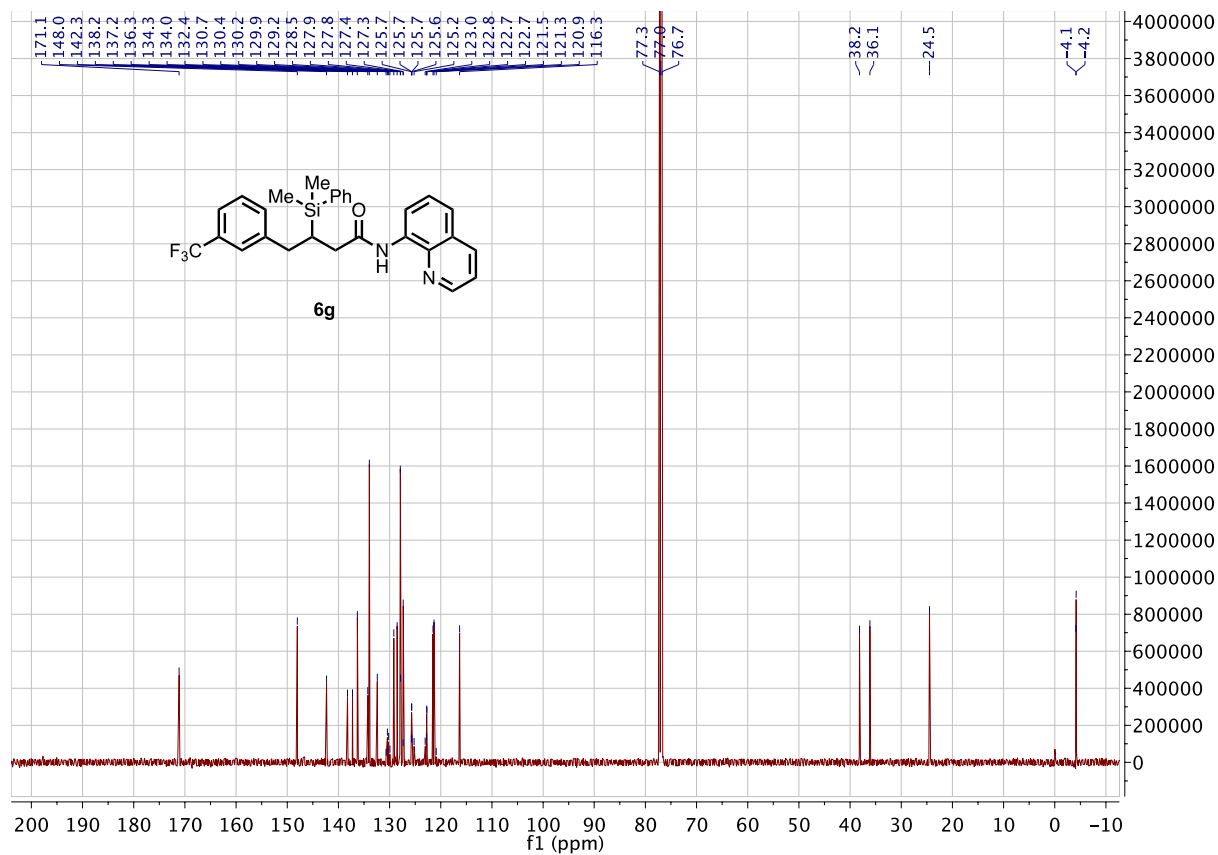

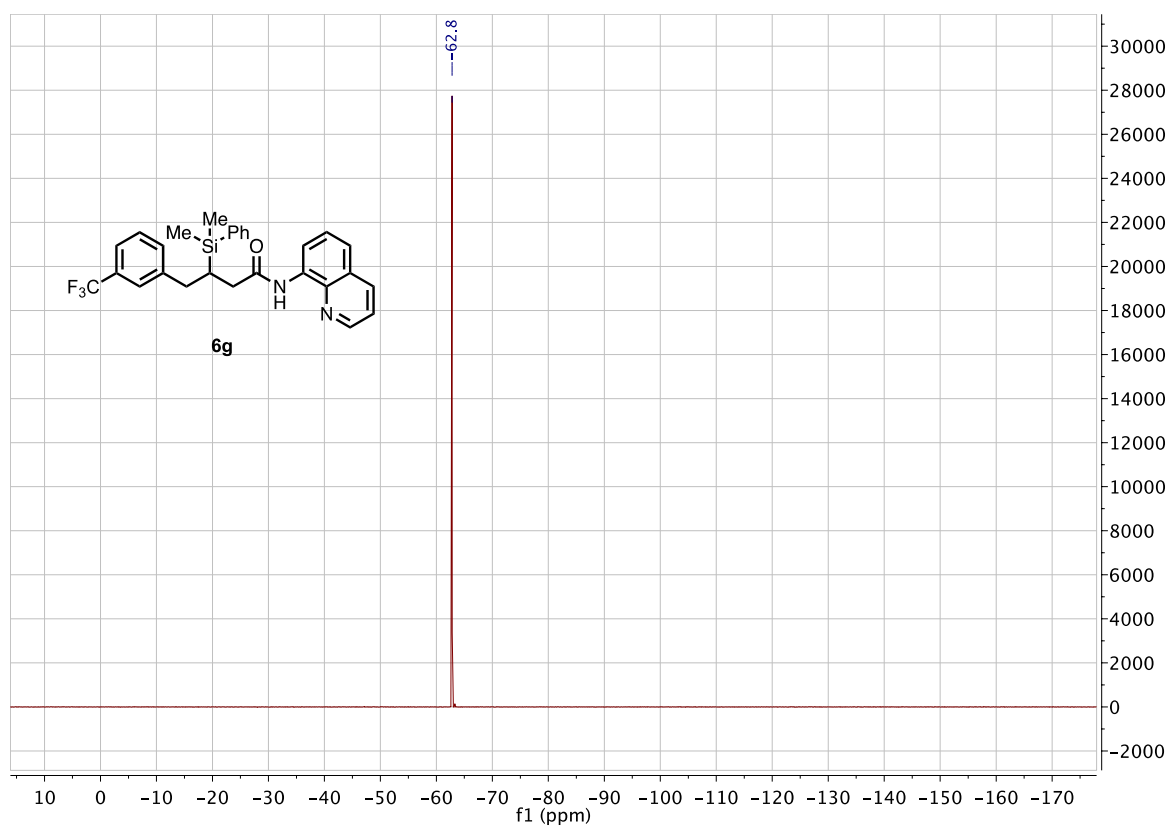

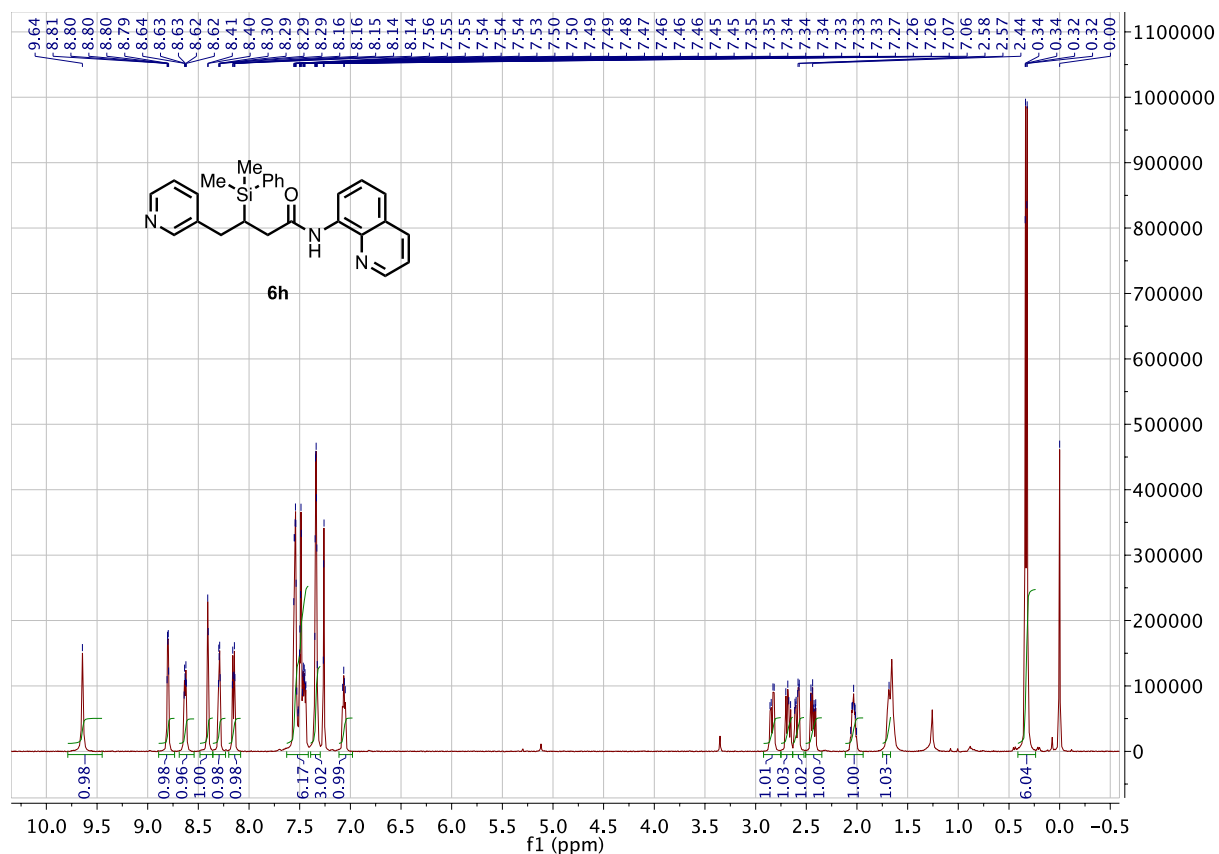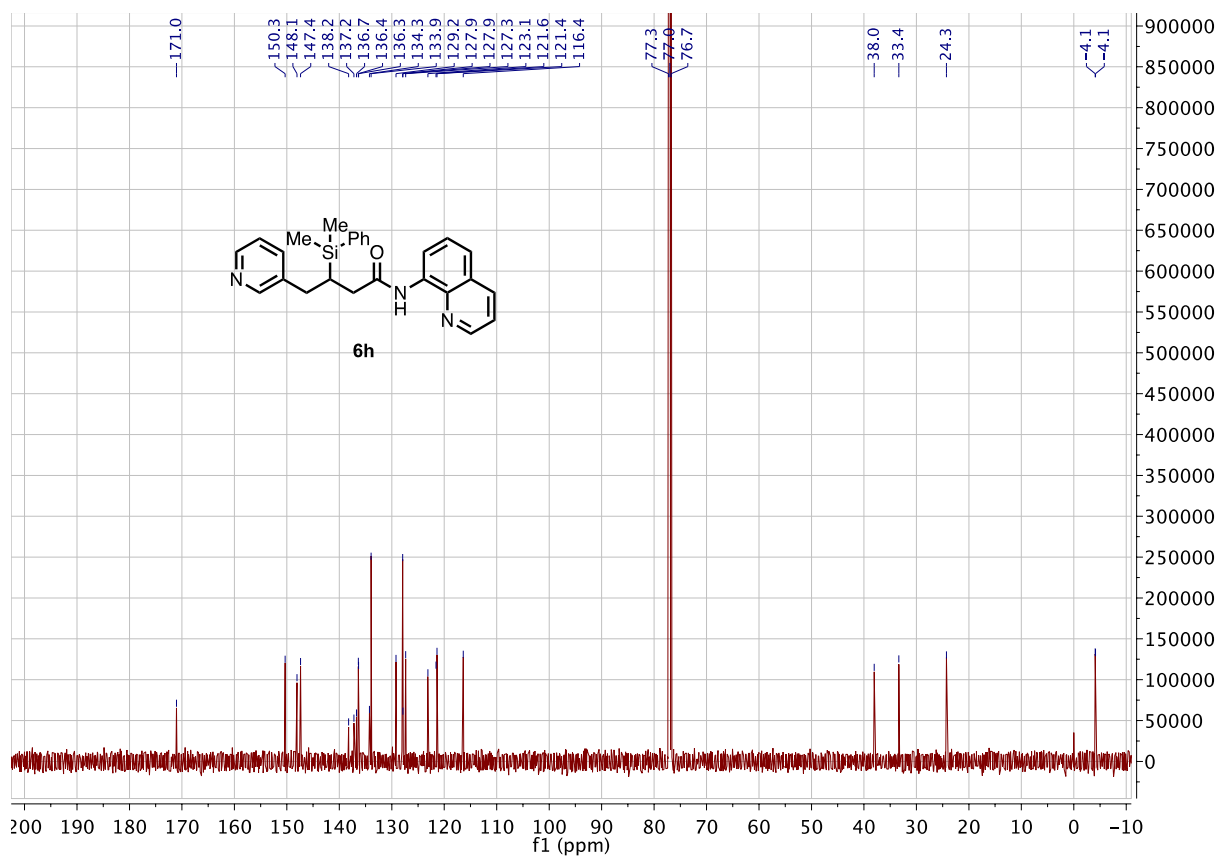

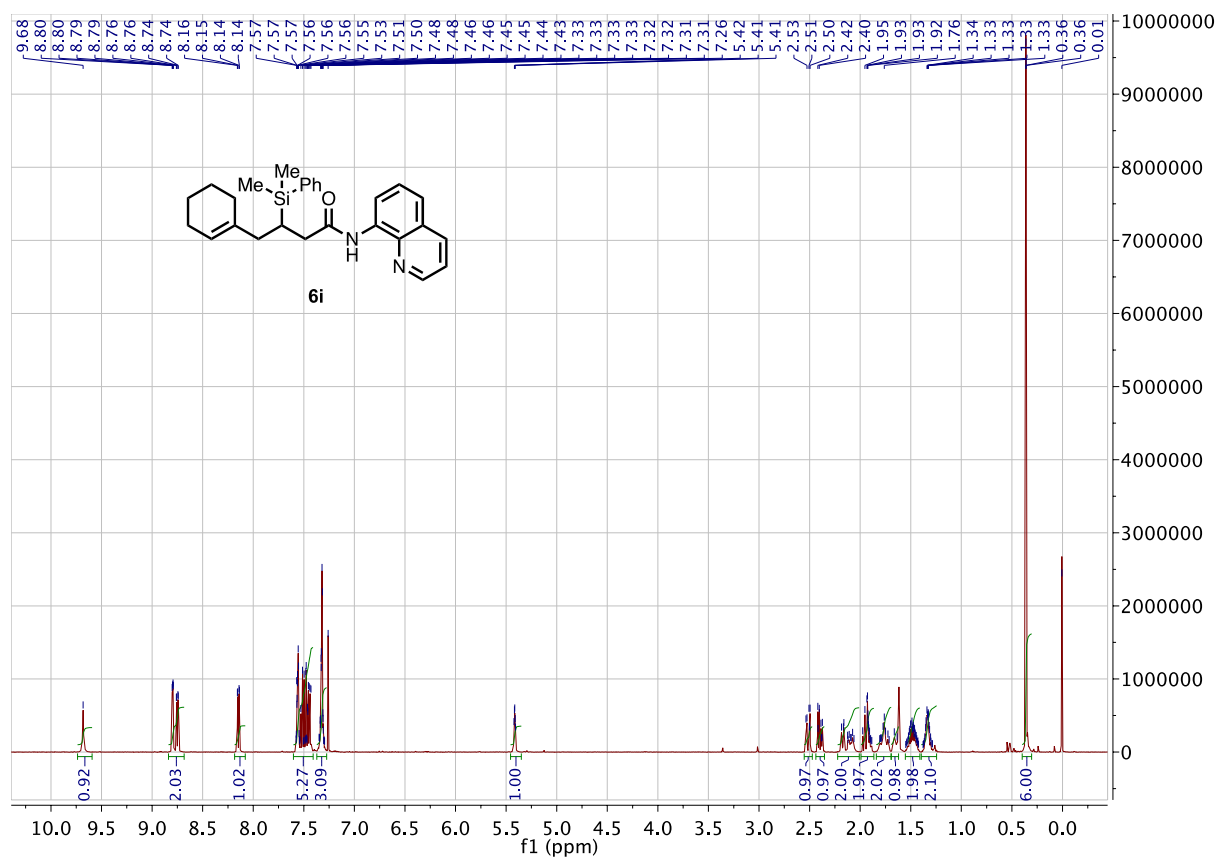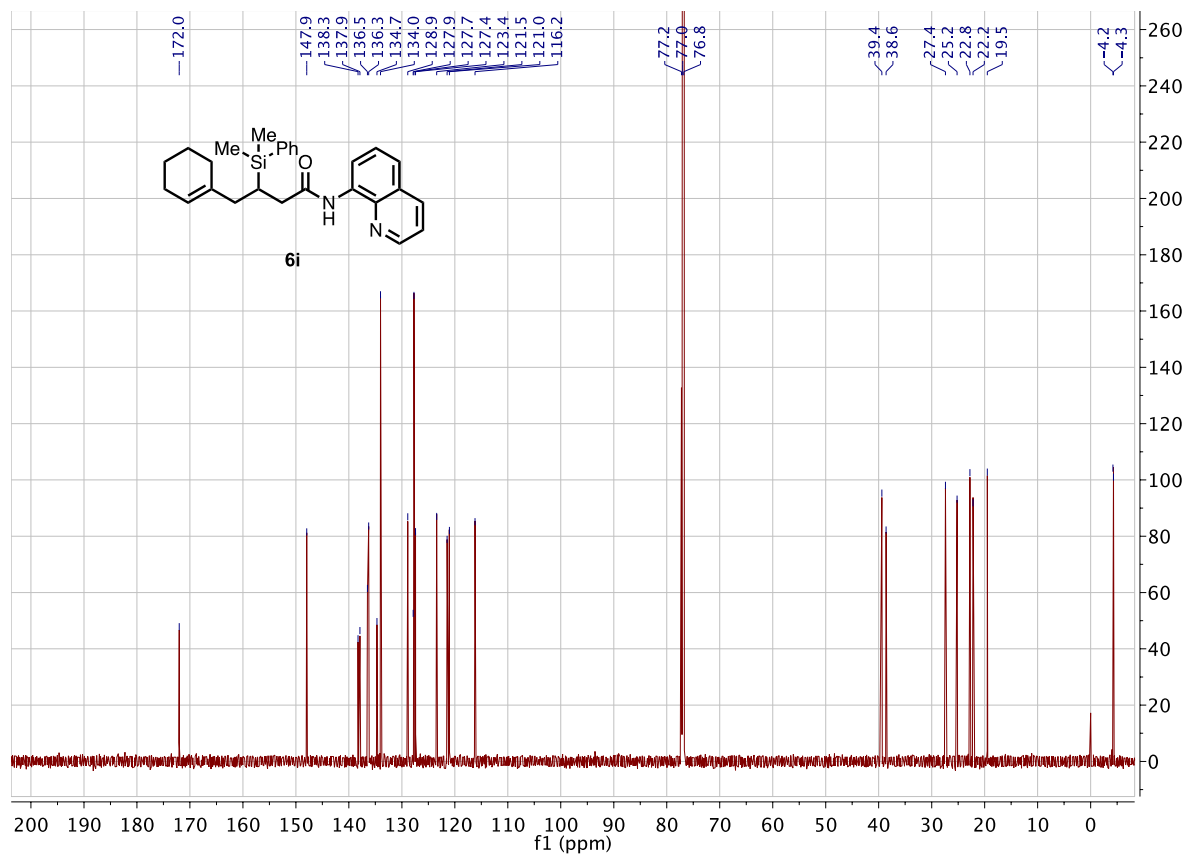

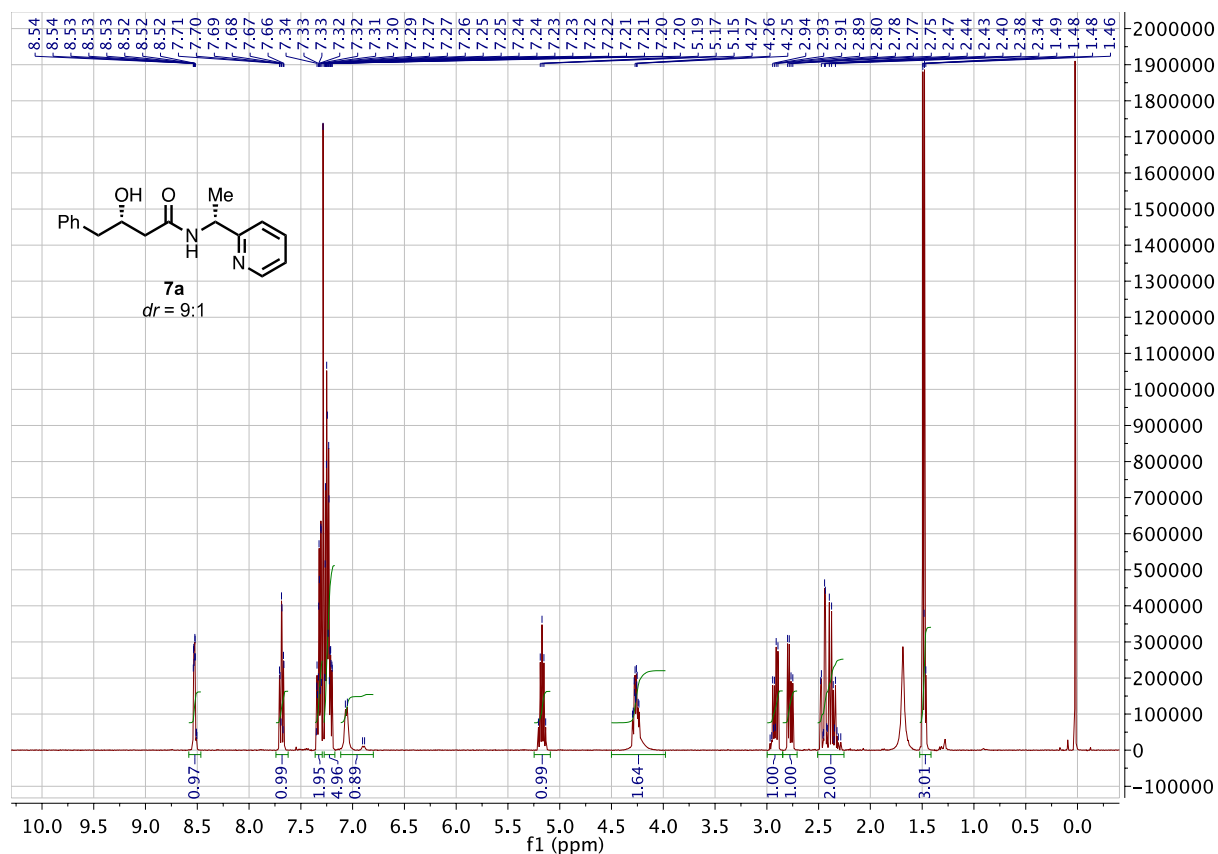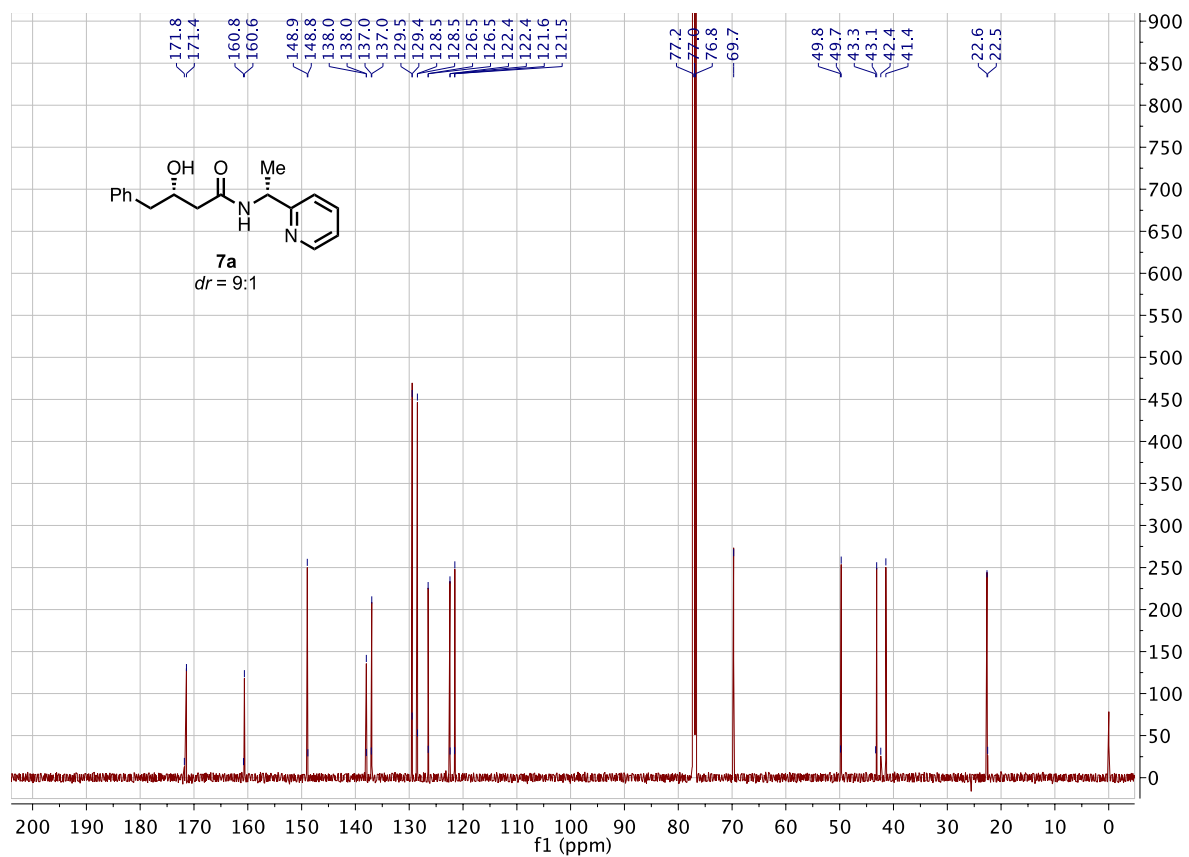



SFC Chromatograms of **7a**

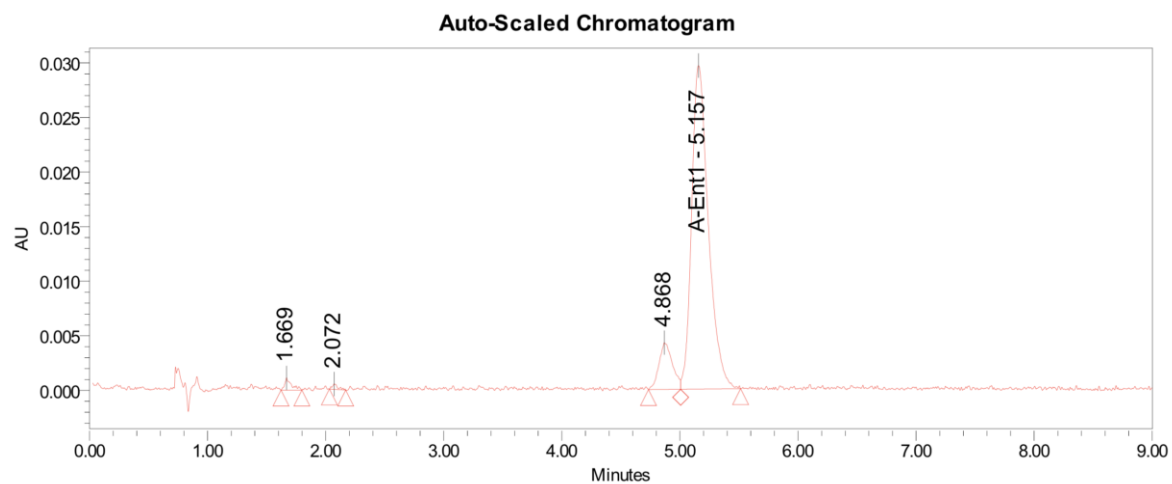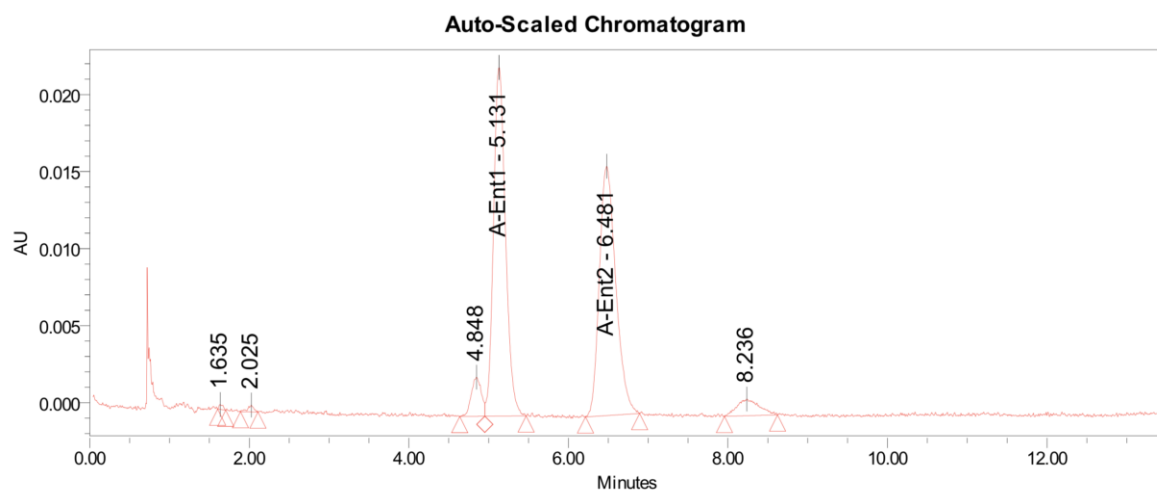

Area Summarized by Name

|   | SampleName                           | ent1   | ent2  | ee     | Area1  | Area2  |
|---|--------------------------------------|--------|-------|--------|--------|--------|
| 1 | <b>7a</b> -major diastereomer-Rac    | 50.51  | 49.49 | 1.03   | 236387 | 231589 |
| 2 | <b>7a</b> -major diastereomer-Enant  | 100.00 | --    | 100.00 | 291730 | --     |
| 3 | <b>7a</b> -minor diastereomer-Enant  | 51.45  | 48.55 | 2.91   | 22198  | 20943  |
| 4 | <b>7a</b> -minor diastereomer-Chiral | 100.00 | --    | 100.00 | 33917  | --     |

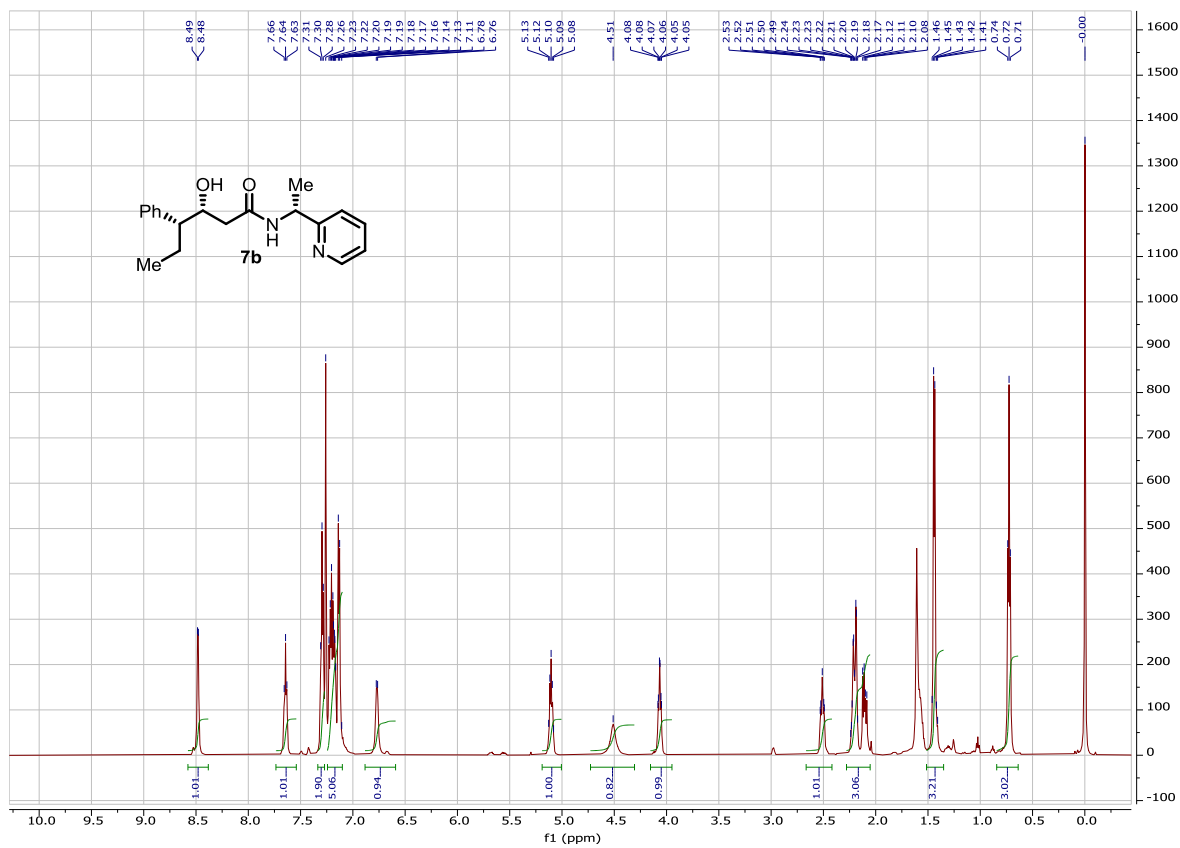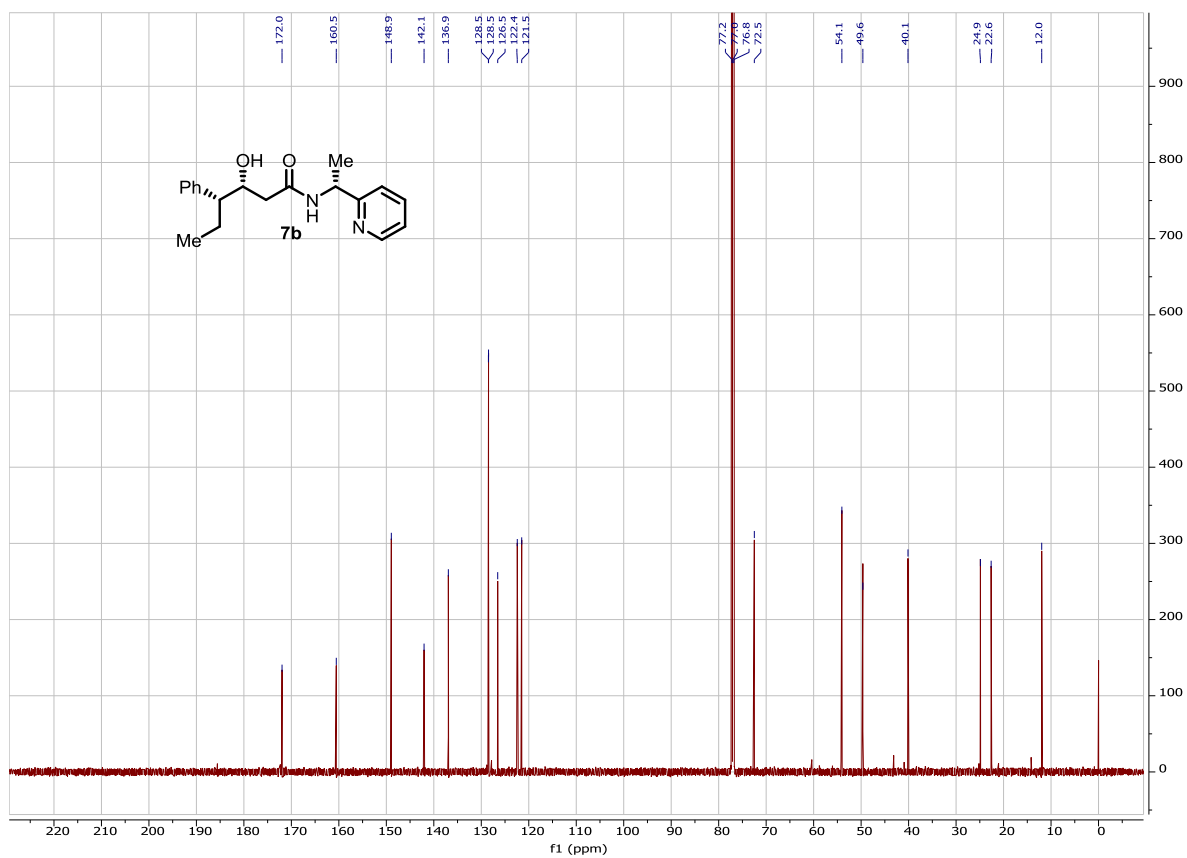

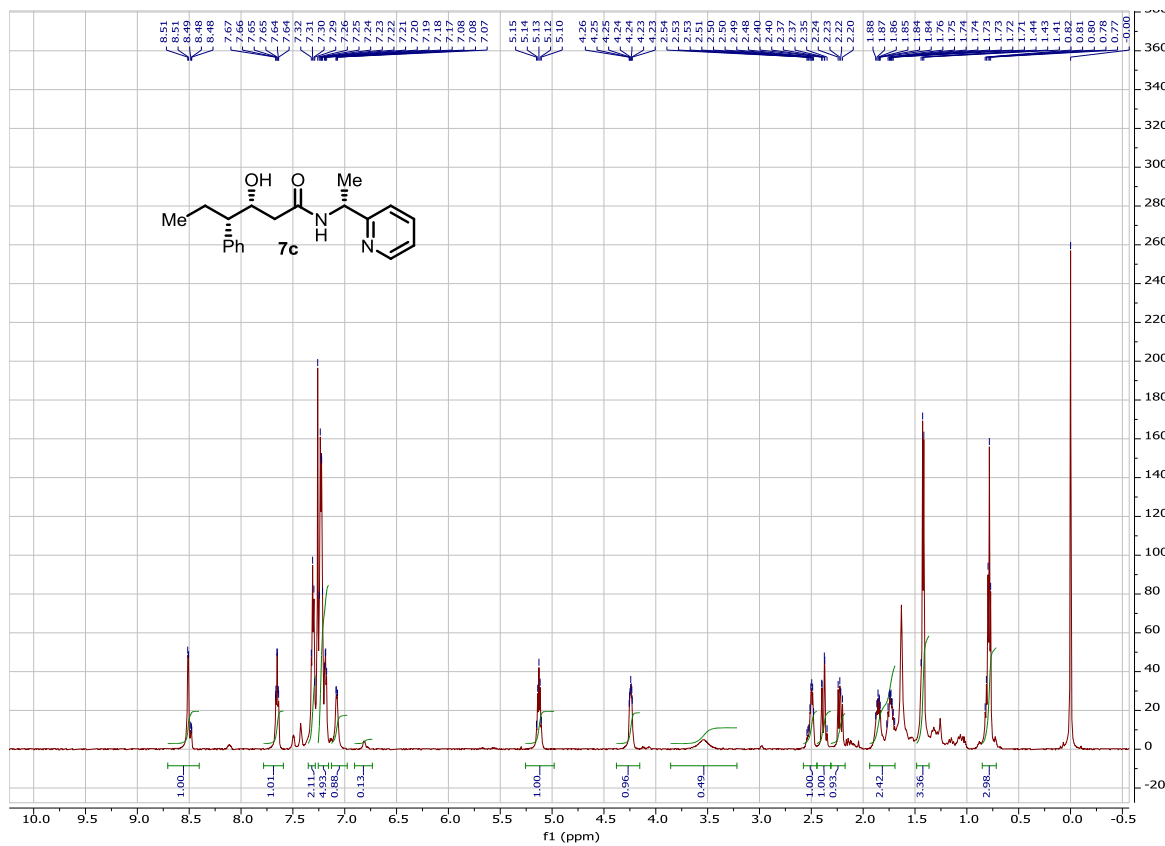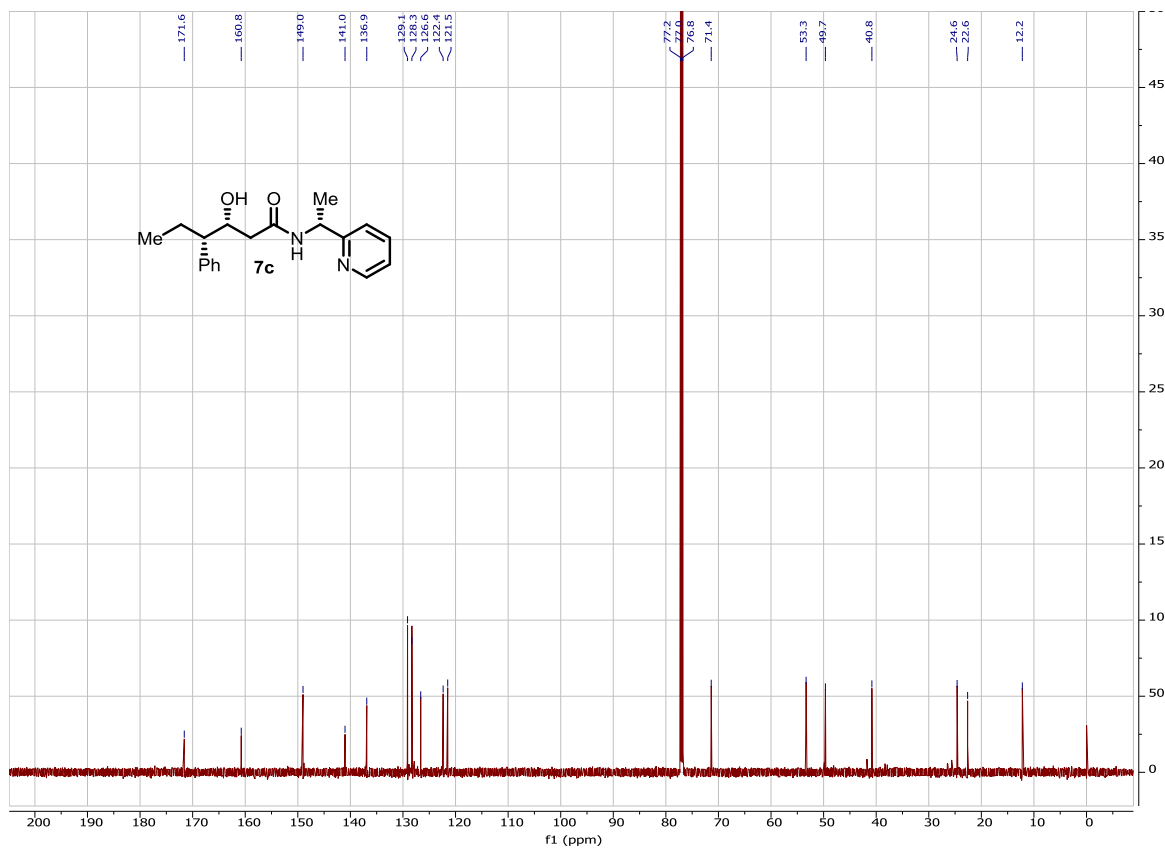

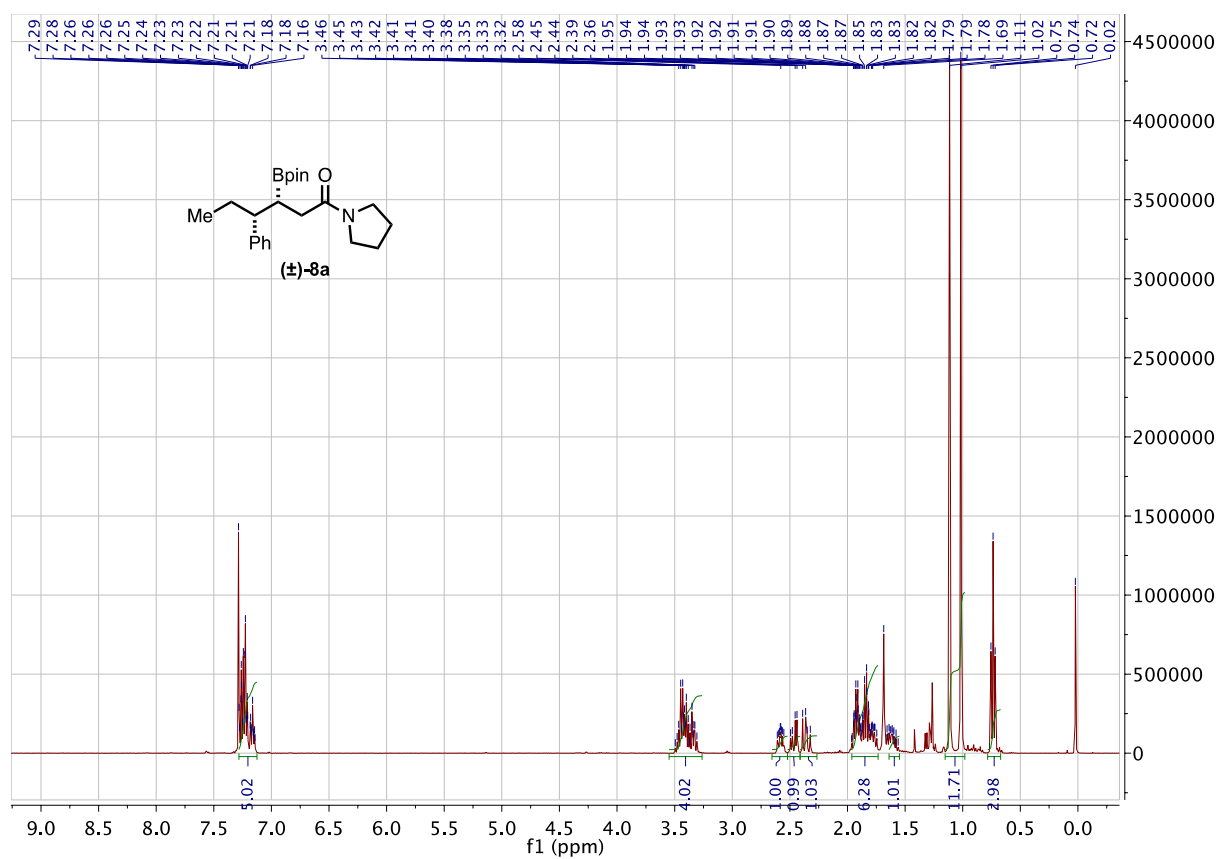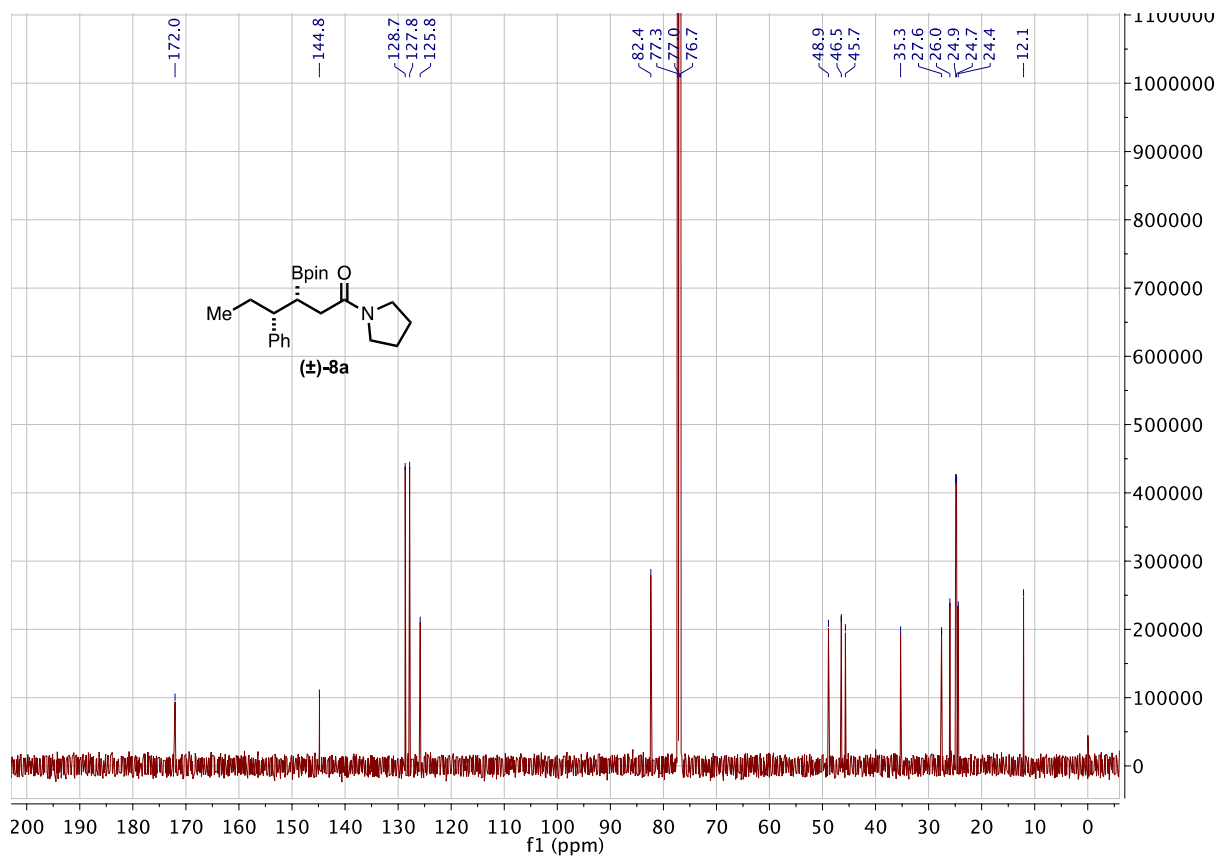

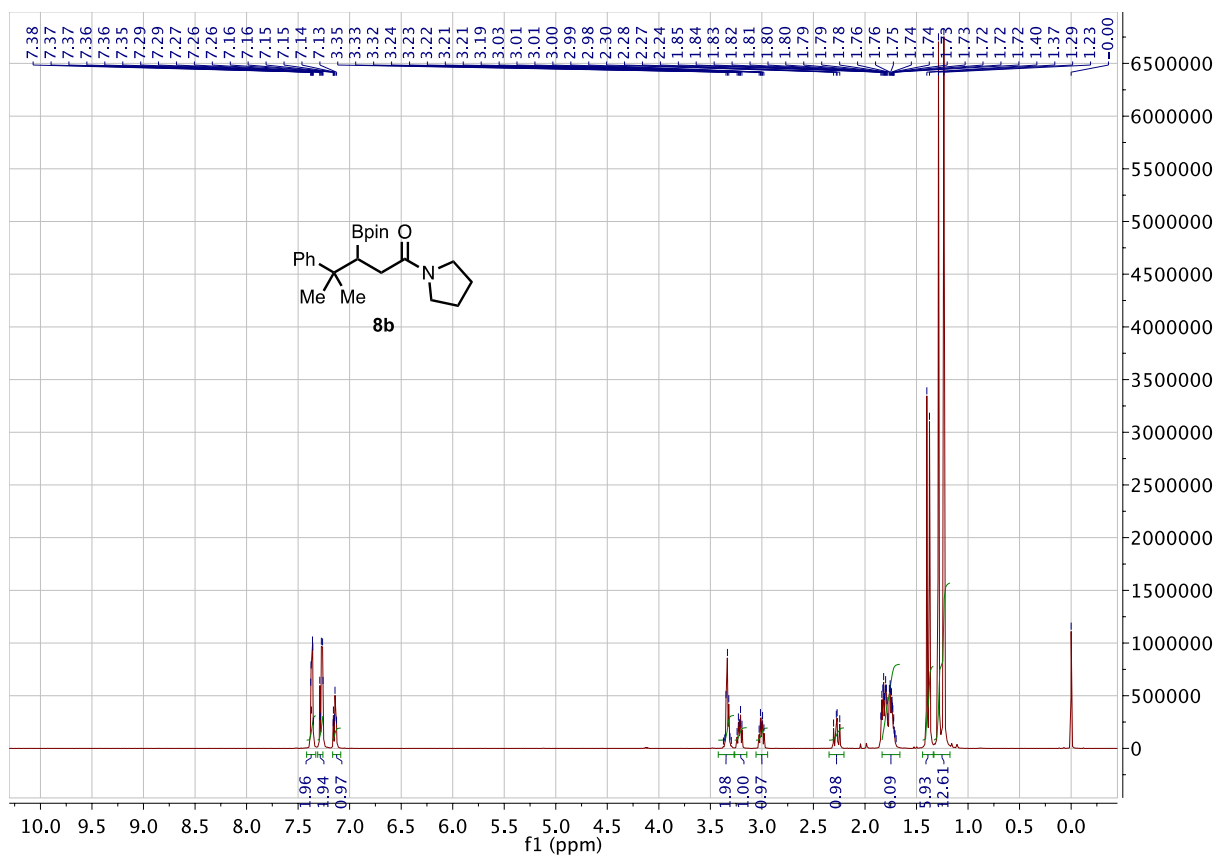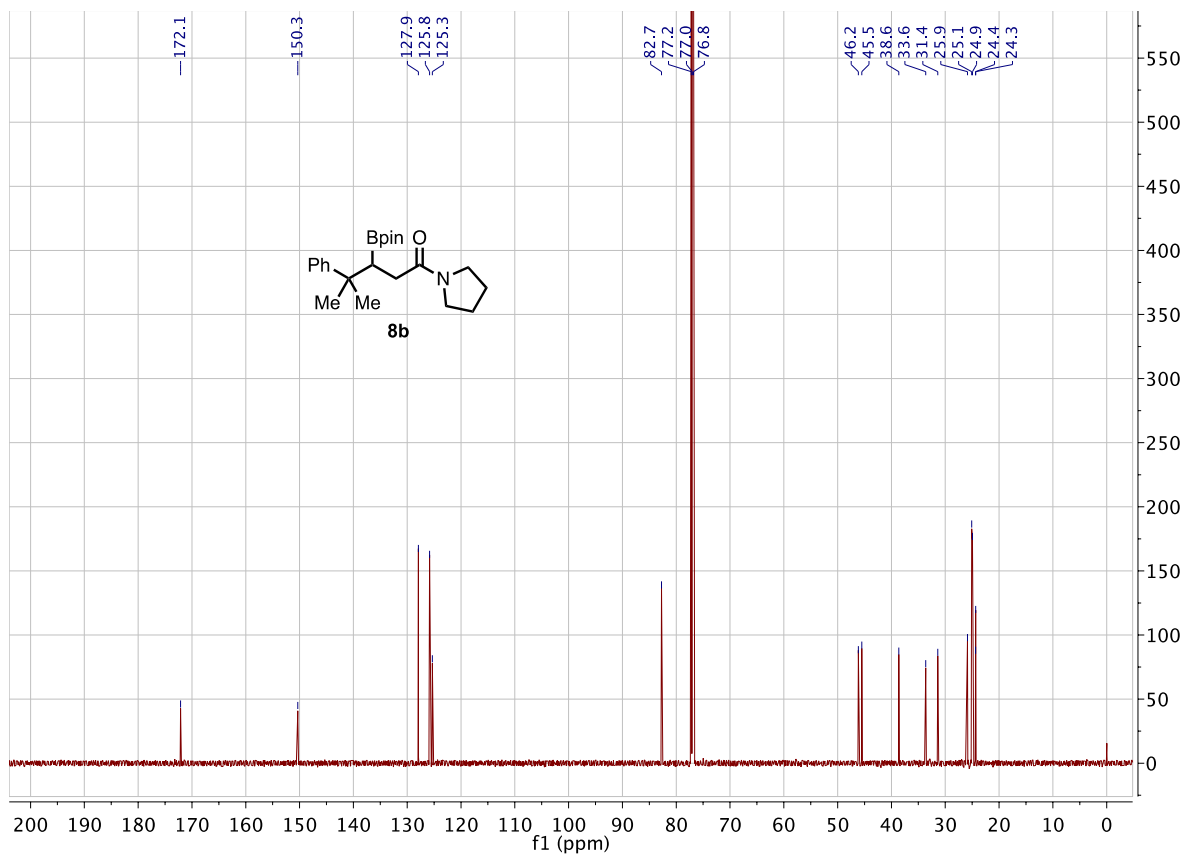

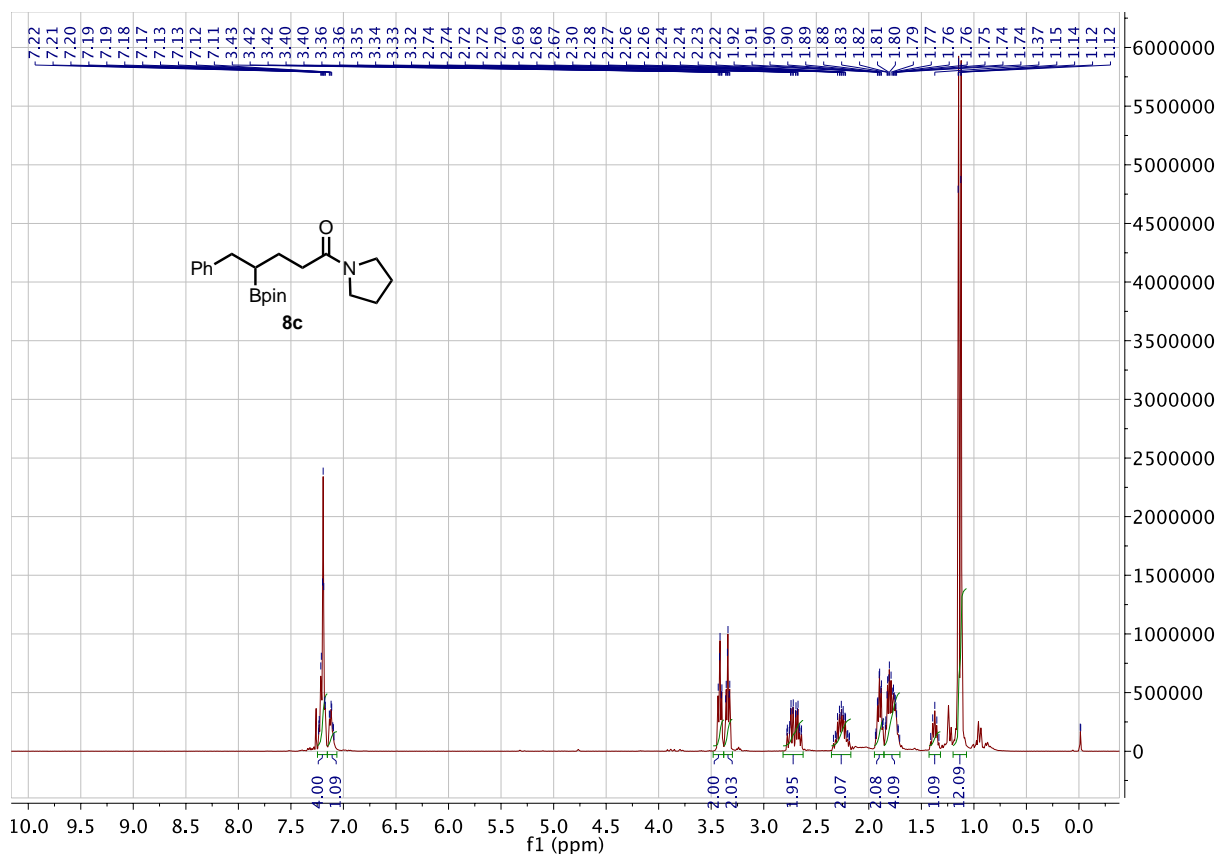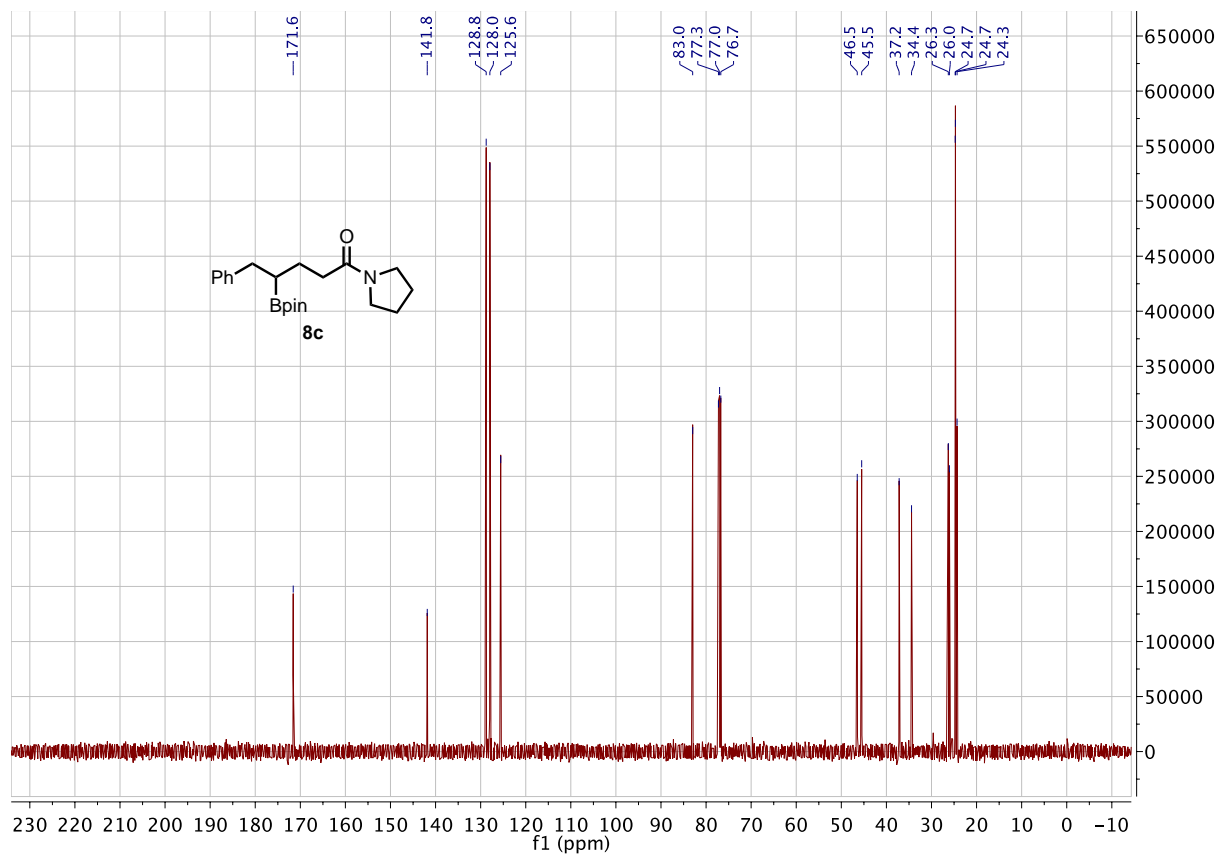

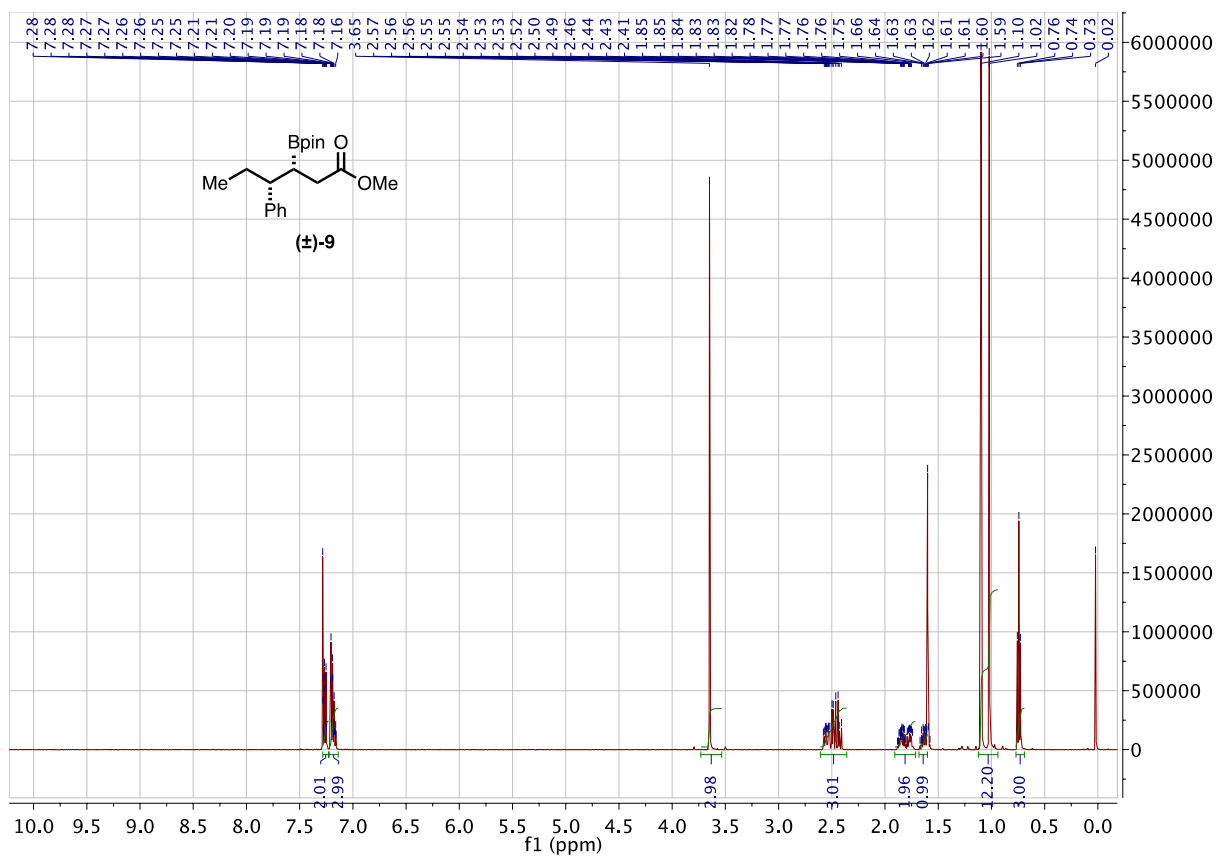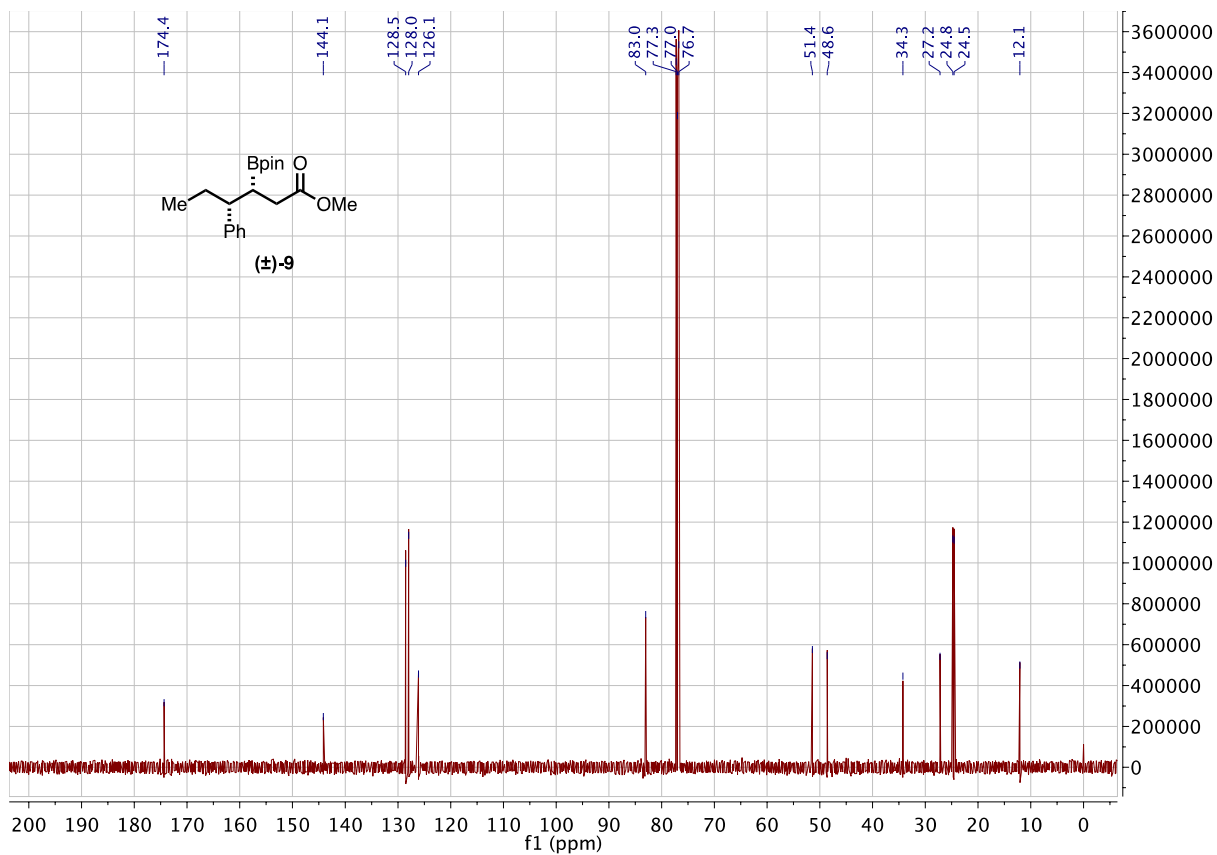

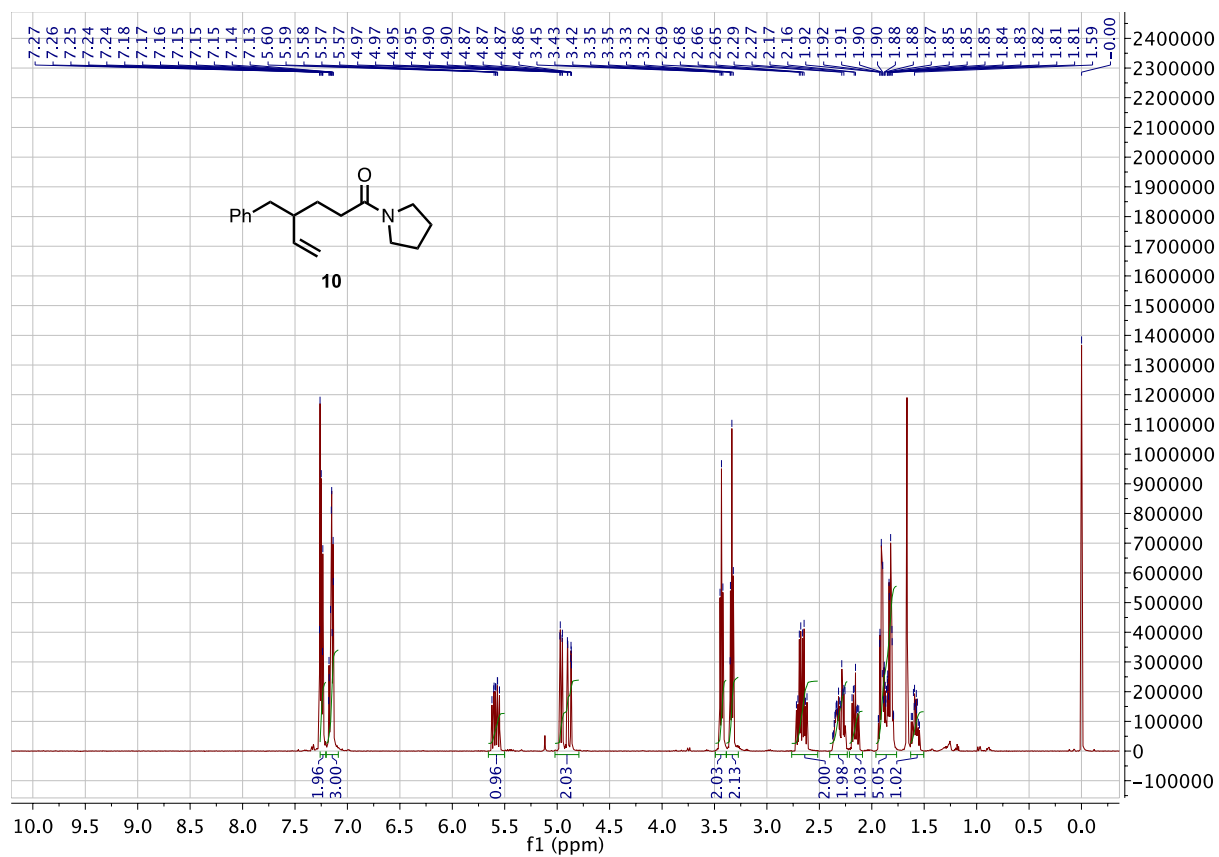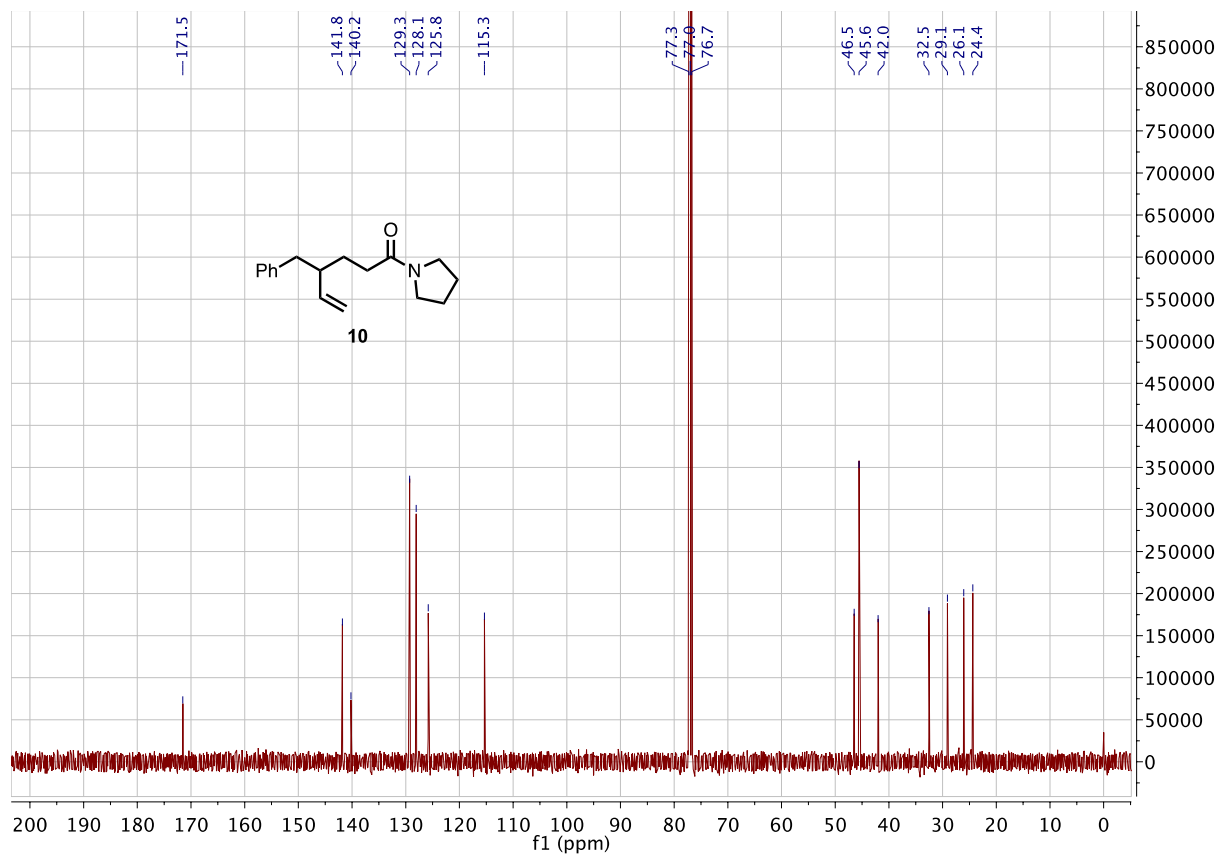



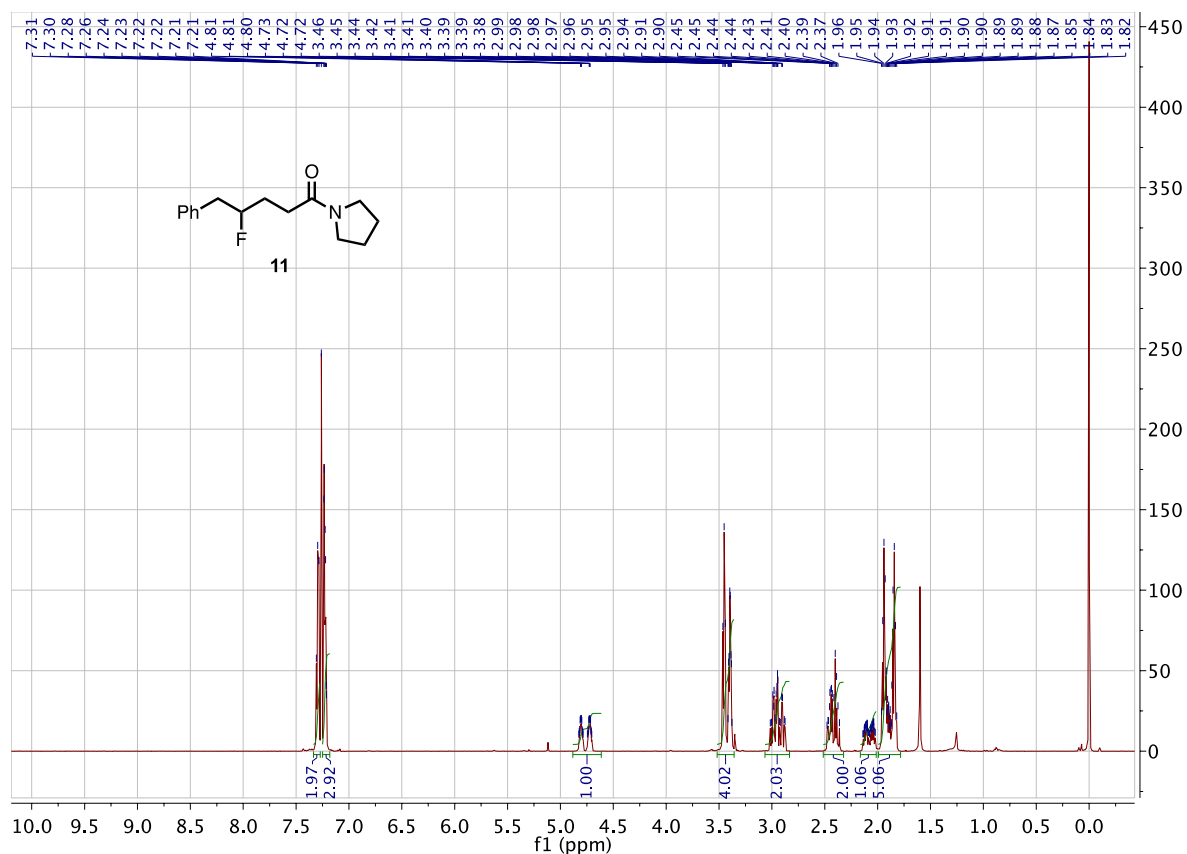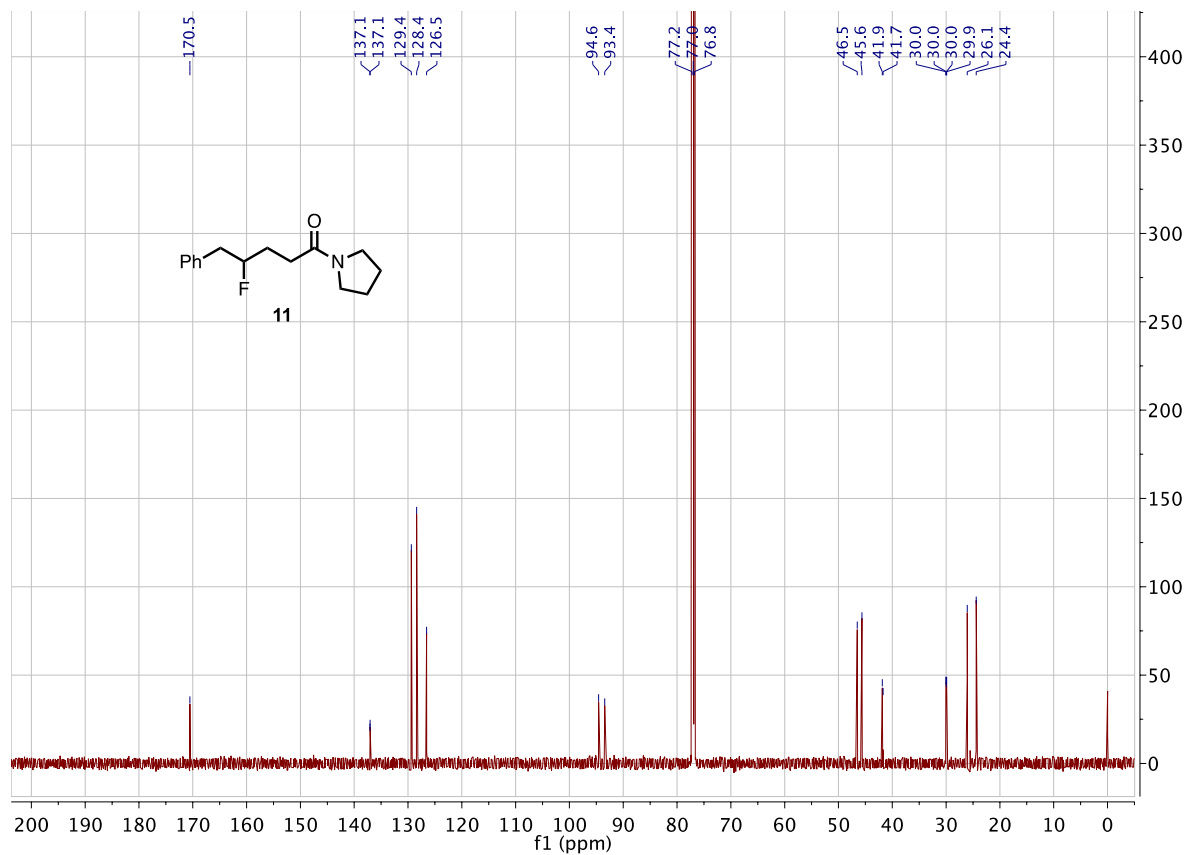

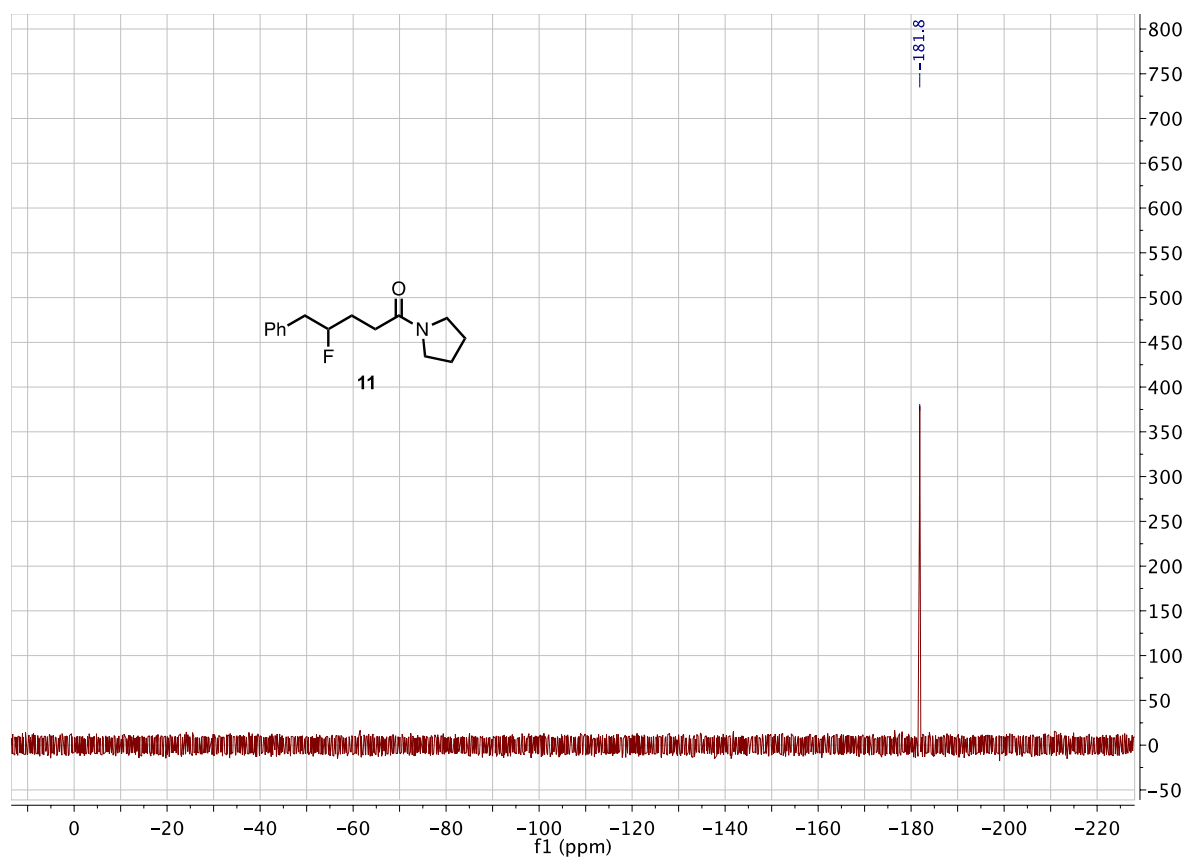

Supplement: NIHMS1603231-supplement-Engle_SI.pdf [file NIHMS1603231-supplement-Engle_SI.pdf]
